# Supplementary material for: iROS-gPseKNC: Predicting replication origin sites in DNA by incorporating dinucleotide position-specific propensity into general pseudo nucleotide composition
Source: PubMed Central journal article supplement (PMC5085147; doi:10.18632/oncotarget.9057), 2016-04-27
Supplement: oncotarget-07-34180-s001.pdf [file oncotarget-07-34180-s001.pdf]

# iROS-gPseKNC: Predicting replication origin sites in DNA by incorporating dinucleotide position-specific propensity into general pseudo nucleotide composition

## Supplementary Materials

### Supporting Information S1: The benchmark dataset consists of 811 DNA samples, of which 405 are experiment-confirmed replication origins and 406 non-replication origins

I. Positive subset contains 405 replication origins with each having 300 bp.

>Positive Sample 1

```
CTGCCCTTAATACATACGTTATACCACTTTTGCACCATATACTTACCACTCCATTATATACACTTATGT  
CAATATTACAGAAAAATCCCCACAAAATCACCTAACATAAAAATATTCTACTTTTCAACAATAATACA  
TAAACATATTGGCTTGTGGTAGCAACACTATCATGGTATCACTAACGTAAAAGTTCCTCAATATTGCAAT  
TTGCTTGAACGGATGCTATTTTCAAGATATTTTCGTAATTACACAGGCCATACATTAGAATAATATGTCACA  
TCACTGTCGTAACACTCTTT
```

>Positive Sample 2

```
GTTGATTAGTACTGTTGGTCTCTCATTGAAATTTTACGTGACACCATCATTTTACTTCCACATAAGTTCT  
AATGTTACGTAGTTCAATTTTAGTCGACCTAGCTTCATATTTATTTTAGAAGCAATTCGTAATATCATT  
TTGCTTTCGAAGAAAATTAAGACTTCATTTACTATTCTCGTGATATTTAGTAGGGCTTCTTTTGTATC  
GAACCATTTTATGCAATGGCCCTTAAGTTACCGTTATTCATACCAATTTGACGTAAATTTAAATGCGT  
TCTGAAGTTTCTTAAATAAC
```

>Positive Sample 3

```
CAACCTAATTTTCATCATCAGTTAAGAAAATAGAATAACAGTTGTATGGGTACCTGGCAGGGAGTAAAT  
CCAATAAGGCCACTACGACAGACACAATAGCGTCAATAATAAAGTTCCATCTCCATCCCTCTAAACCAT  
TTACACCATTTAACGATGAATATACGGCTGACTGGATCCCACCAGCGGATAGAATACCGATATACTGGCC  
CAAATAGTAAAAGCAGAACGACGCACCATTTTCATCATGTTTGTAAAAGGAACCAAACAAATATTGGTAT  
GCCAAATAACTTGGCGCTTC
```

>Positive Sample 4

```
ACGCTTTCAAAGTTTTCTTCTATAAACATACTTGTGGCAGCTTGTTTTTTTTGTTTTATTTTTAAGTTTT  
GTTGGGTCTCTGAGAACTTTCAAAAAAAGAAAAAGTAAAGTATGATAAACCGAGCACTTGCCAAAGTAA  
TTAACGCCCATTA AAAAGAAGGCATAGGAGGCATATACATATATATATATATATATATATATATATATATGGCTGCTG  
ACAGATATTCTGCACTTAAAAACTAAAAATATTATACCAACTTTTCTTTTTCTTCCCGTTCAGTTTGCTT  
GATTGCCCCAGCTCTTTGAA
```

>Positive Sample 5

```
AAAAAGCAGCAGTACTTTTCATCATTACCTCATAATACTGTGCACACGGTTATAATATTTGGTGGTTACAG  
ACAAACCGGTGATGATCGTTACGAAGCAATGAATGATTTGTGGAAGATAGAGATACCCGTGATACGTCGC  
GGTAAAAAAGGTTATTGTAAAGTTTTTTCAGAGACAGCTAACGCGATACTACTGACGCCAAGCGAAAAGGACA  
AATCGGATTGGCCGAAGAAAGAGCCTTTTCTGCCTTTTCTGTTTCATGGGACTTCGTTAATGGATAGGAG  
TTCTCTTGACATGAGACTAT
```

>Positive Sample 6

CAATGTTTTATCTACGTTGGAGTAAGATCGTTTATCACTTCCATATTTGGACCAAATGAAAAGTTCAATC  
GGCCAAGTATTTTCATGGATGGAATGACGTTTGGTAAGGAAGTGCTTTTTCTTTTCCACATATTTCCCT  
TTCTCTCGGGGAAATTTGTTTTCTAAACATAAAAAATAAAGCAACAGCAAAAAAGAGGGTCTGTCCAGCG  
AATAAGAAGAAAACCTCCTTTTCGGCTTTTGAAGATAGGTTGCAGTTGTCTGCGGGCACAAAATGGGCAA  
TTTTTTAATACTTTTTACG

>Positive Sample 7

AATATCCAGTAGAAACAATGCTTGGTATGTCGTTCTTCTTACTTTCTTCAGTAATGAGTTGGTAGTTTTTC  
TCTATTTAAATATGAATAAATCAATATGTACTTTCTTTCTTTAATCAAAAATGTTAATATGATAAAAATAC  
AGCATCCAAAGCAGTTAATCAAGACTTAAATATAAAAAATTTACATATTTAGAAAACAAAGATAGGGTAA  
ATATTGAAATTACATAGTAAACCATACCTTAAAAGCAGAAATACTGATACCACATGAACTATTGATCAAT  
ACTACTGCTATTCTTCTCCT

>Positive Sample 8

AAATAATAGGTGTAAAATGACTTTGGCTTTTAAATATGCAACGGTTGGTGTTCGTAATTTGAATGTTGGG  
AAGCGCATGTTCAAGAACGTCCCCTTATGGAGGTTTAAATGTCGCCAATAAATTAGGAAAGCCCTTAACTC  
GCTCTGTAGGGTTAGGCGGTGCTGGCATAAGTTGCTGGTGGCTTTTACTTGATGAATCGCCAGCCTTCTAA  
GTTGATATTCAATGATTCTTTAGGGGCAGCTGTCAAACAACAGGGTCCCTTGAACCAACTGTGGGCAAC  
AGTACGGCAATTACCGAGGA

>Positive Sample 9

GCAACGCTGAGAGCTTACAAATTCTGGACTTATTGAATCAAGACTCTAATTTTGAAGCTGCAGCTATAAT  
TCACGAACGCTTGGAAGTTTTAACCTAGCAGTCAGGGATTTATTAAGTTTTATTGAACAATGTCTAAAT  
GAAGGGAAAACAAATATATCTACTTTATTGGAATCTTTGAGGAGGGCCTTTGATGATTGTAATTTCTGCTG  
GTACCGAGAAAAAATCGTGTGGATATTATTGATTACATTCCTGATCACTCTATATGGGAAATATCCTTC  
ACACGATGAAAGGAAAGATT

>Positive Sample 10

CATTCAGCGGGAAAGTAGTTGTTTATCACTAGACATATAATTATGTTTATTTATATTTAGTGGGAGCAAA  
ACAGTTTATTGAATGTTTACCAGAACCGAAAAAAAAGCTCTTCTAAACTGTTGACATCCAGTTCATTTAC  
TTCCACGTGTAGATGTGAAGGAACAAATATTTTAGCATCGTTCATACAAGTAATTATGCTATATTATCGA  
TCCTCGGATTTACGCTTCCGTTATATCGGATGATTGTTACTCGACCTTTATGTCGTCTTTTTACATCATA  
TATGATAATATGCTAGCAGT

>Positive Sample 11

CCATTATCTCTTACGTGTAATTTAAAATGTTTATAGTACTATTTGGTTATGCTTGTATGCCTCTATTAT  
TACTTGATCTTTTTATGTTTTCTTATGATTGAATTTATATTCTAAATTCCTCACGAATTTATACTG  
AAGATTTCTTCCAGGCGAGAATAATAAACACATATTTATGATGATAACAAGACGAACGTGTATTAAGCT  
CCCAGTACGAGGGAAGCAGTAAAAATTATCCCAAGATCCATTTAAAATGGATAACTCCACGAGCTACAAC  
AAAATACTAAGGGAATAGGC

>Positive Sample 12

CACGGTACAATGGAGATATTTGCATGCCTATAGAAACAAGTAATAGTTATCATATTATTTCTAGATTTT  
GTCACTGAACTTTTCCACTAATGAATCCTATCAAATTTATATATCCAATATGGCTGCATTCCCAACTAAA  
TATTAATGCGGCTAAGTATAAAATGTCTCCGCATCGGTAAAAAGCATTACAAATGCGTATTATACTAG  
CGAGAAAAAAGTATAAGTATCAATGCCAATCACCTCTGACCATAAACTTTCTAAACATGAATAATAAAG  
GTGTTGAGAGTTATTATCCT

>Positive Sample 13

CTGCTGGTTTGAAGAACCAATGCTTTAAGTACTTTGGCAGGTATTTTCATCCTTGCTTTTTTTTTAAAATGA  
GTGCGTAACCGTACTTTCTTAAAATAACTAAGTAGAAAGTATTTAATATATAAACGTGAGTGTAAACA  
TTCAAGTATTTTAACTTTACGCGGTTGAAGAATGCTGTGTTCGAACTATAAAGCGTCAGAAAAGATGGT  
TTAGCGAAGGCACCATTATGAAGATAGACACATTTCTTTTTTTTTTTTTTTTTTTTTTTTTTTTTTTTTT  
TTTTCATTTACTTTTATTTT

>Positive Sample 14

CTTGGGACGATGATGTCAACGATGACATTTTAAAAAATATGATACCAAATATTTGAGTGGTATTGCCAA  
GAGATTAACAAGGAAAACAAGGGTTTGAATCTGACTTCAAGTGTGCAAACACTTTTTTTGTCATGGTGT  
GCATATGAAATAAACGCTAGAGGTTACAGTGACATCTGTAACATCTTCACCAAAGATGAATTGGTCCGTT

TCTCCTACGGCCAAGACTTGGAACTTATTATCAAACGGGACCAGGCTATGACGTTCGTCAGATCCGTCGG  
TGCCAACTTGTTCAACGCTT

>Positive Sample 15

TGAAACGTTAACAAATGATCGTAAATAATACACATATACTTACCCTACCCTTTATAACCACCACACATCA  
CATGCCATACTCACCTTCACTTGTATACTGATATGCCATACGCACACGGATGCTACAGTATATACCACTC  
TCAAACCTACCCTACTCTCACATTCTACTCCACTCCATGACCCATCTCTCACTAAATCAGTACTAAATGC  
ACCCACATCATTATGCACGGCACTTGCCTCAGCGGTCTATACCCTGAGCCATTTACCCATAACTCCCACG  
ATTATCCACATTTTAATATC

>Positive Sample 16

ATTGTGAAACCGCTTTGTTCTGGAGGGCGAGAAAAAGTTACGGTCACTCTATCTTTTTTATAATTTGGTC  
TAACAACTTGATATCAGAACCACGTAGAAGAAAAAGAGACTAATAGTAAAAATATCAAGAAAGTTGACC  
AATTTTTGTTATATATGTCGGTAAAAGTTATGACTTGGCACTGGTCTTGGTTTACTCATCAATCAGCTAG  
GATCAGCGCTGAGTGACTGCTTGC GGCTGGGGCGGCTAAGAAATGGGAATATGTACAGTACAAATCCGAA  
CTTTGCGAGCCTGCCTCGAT

>Positive Sample 17

TCTAAAGAATTGTTGGCATCTCTAAAGAGTGCTACTGAATCATTTGTTGCCACTTTTTAATGTGAACTAA  
AAAAATAAAAATGAATATAAGGTACGTCTCCAAAAGAAATGTAAATATAGAAATTTTAAAAAATAA  
AAAAAACATAACTAAATTTAAAGTGCAGCCCAACAATAACCCTGAAAAATCTAAATATCTTAGAATTT  
TTTTATTTTGATTATTATATATTATTATTCTTATGGTAAATAATGCCCTACTTTTCTTCTAAGGAA  
GTGAGTTACCACCAAATAA

>Positive Sample 18

TACGGCATGACTTAACAGTACAGTCATGATTTAGGAATTTGAGTGTCTCCGGGGTTTTGCAGATAAAAA  
TTTGTCTTCTCTCGCCATTCCTGGAGATTTTGAAAAGAGTTGGTAATGTGTTTCAAAGAAAAAATA  
CATTCCAAGAATAAATACCAGGATTTCTGTGACAAAAATTAAGGGAAGTATGGCATGCCTAGAAA  
TCTTTTCTGGAAAACCTGAAGCATATCATATAATTGTATGAACTTGCCTTCAAAGATGTTACCAAATA  
TTCAAGAGTATGTGAGCTTT

>Positive Sample 19

AGATTCCTGATTGCTTGCATGCCTAAATACTTCATAATTGTATTAGTTTTAAAGAAAACCTTTTACTGAG  
ACAAAACATAAATTTAAGAAAAAGGTTCCGGAGCCGTTTTAAAAAAGAAGATTAAGATATTATATTT  
ATGTAAGAATTAATAACTGTCAGAGAAAAATAGTTTTAAAGGAGACGGTGAACCTTTACCTTCCC  
TTGATATGCAAATTTTTTCAGCTTTTCTAAAACATAACATTCTCGACTTTTTTTTAGAAGACTTTATG  
GGTGTGTTAGAAACAAAGCT

>Positive Sample 20

ACTCTTGAACAAGTGCCCTCAGCAAATTCATCTGCCTCGAAATTTGAACTTATTTTTAACGTGTTCAATA  
TTTAGCTAAAACGTTCGTTTTTCAGTCCGGGTACCGCAGATAAGCCATCCCGGATCTTTAAAGGAAAACGAG  
GAATTCAGTGGTGCAGACTACACTTTAATCTCAATTGACCAAAGTGAGTCTCAAGTAAGACGAATATTA  
TTTTCTTTACGACTCAATTGAATTCCTAATAACACTTTTGTGTTGCTGTATTAGCTTTTAGCTTTGAGA  
GCGATGAAGCAAGAGAGAAA

>Positive Sample 21

GGAAAAGATTTGATGAAGACCAAAAACAGCATCGAAGTGCTTTGCTACGATTTCTTTTTTACTCTCCGG  
TTATTTTGAGCTATCTTGTCAATTATATCTTTAAATTTATATATTTCTTTGCCAGCTTTTAAAGCGTTTAC  
TGGAATGCCCATATGTTCACTAAATATAAACTGATTATCTCTCCTCTATATTGTCATCTCGGCAGAA  
AAGCTACTTTTAAATAAGTTTTTAAACACCAGTTTTCTGCAATGATAAAAATAGCTACTTTGGATAGAGGC  
TGAGGCCTAACTAGTTGGAA

>Positive Sample 22

CAAAGAGGTGTGTGGAGTATTATTAAGTAACTGTACCAAATGTGTAGATTATAGGATATTCACCATTT  
ACTTTCTGGTTTCGTTTCTCGAAATTTTTCGTTGTCCTATTTTCTTCCGGTAAGTAATTAGATTTCTTAAA  
AAAGGCATATGATAAATAATATTACACGCGATTCCGCCATCTTGGGTTTCCCACATACATACTTCACGAA  
GAAAAGAAAGAATTTAGTATTGTGTAATAAAATGATGTTTATGTTTAAATATTTACAGAATGTTTAAAC  
AGGTATTTAATCCATTTAGA

>Positive Sample 23

ATAGACTTTCATTCCAACACATCTGTTGACTAGTAAGATGGATATTAGTCAATAGATGATGTTTCTTATT  
CCAAACTATCATGGGTTTGTAAAGAAAATTTATTTTGTAGGGGAATTGATTACATTTCCCTTTTTTTTTCAAT  
GTACTTTGAAGTTTTTTCTTGTTTAACAATAAGCTTGCCTAATCATTAAATTAGTGCATAAAAAAAAAAGG  
TAAGCCGAGATTAATAAGTAAACAAAGACATACTAAAAAAAAATCATTCTGGTACATACAGCATTCTAGT  
TAATGTTAGATTAGCAGTGG

>Positive Sample 24

GACATCGTAGTAATAAGGTGCAAGCTTTTGTATCCTTCTTAATGATTTGTAAGCAAAAAAAAAATTACGTA  
CATCAATTTGTAATGGAAAGGAAATAAATAGTATAATATGAACACTCTTTCTGAGAACAGTTATCTTTAG  
CTTGCCCCACAACTGAAAGCACATTTTTTAAAATGTTTTACAGATGAAAATGAACCCTTGACTGTTATC  
CTCTGTAAGTCGTTATTTTTCTTTTGCCTTTTTCAGGTTGACTGCTACTGTAATCGTAAGAATATTCAA  
ATCAATCATCTCGCATCGCA

>Positive Sample 25

TTTTATTAAAGGGTTTGGAGCTGTTTTCGGACTGAAAGCCAGTAACAAGCTTGTGTAGGAGTTTGTCTGA  
AAACCATCTTCATTTCAAATAAGAGAGCGAGTAATTTTTAAATAATTTCTTTTCTGAACTACTTAAATCG  
CTATGTACCTTGCAGAAATTAATCTTTAATAGTTAACTAAAAGTAAAAAGTTAGAAATCATAAATAGAA  
AATCAAAGAGACAAATCTCGTTGCAAAAGCTTGAAAAATAGTGCTTTACCAACAGGTTGGCAAACCAGAA  
TGCTAACAAAACCTTAAAATC

>Positive Sample 26

TTTAATCTGCTTTTCTTGTCTAATAAATATATATGTAAAGTACGCTTTTTGTTGAAATTTTTTAAACCTT  
TGTTTTATTTTTTTTTCTTCATTCGTAACCTCTTCTACCTTCTTTATTTACTTTCTAAAATCCAAATACAA  
AACATAAAAATAAATAAACACAGAGTAAATTCCAAATTAATCCATCATTAAAAAATACGAGGCGCGTGT  
AAGTTACAGACAAGCGATCCCTATTCCATGCAAGTTCGGTAAGTAGCAGAAATAATCAAACCTGTTTAAAC  
CCAATTAATAATTAATAA

>Positive Sample 27

GGAGGTGGGCGCTCCCCTATAAAGGTTTCTGATGGAGCTATGAACTATATTACCTAAGTTACTGGGTA  
GGATATGGCTTGAGTTTTTCTTCTTATACTGCTCTGTGTTACTTCTTCCCTGTACCTGGGTGCCCTGTTA  
ACAACATTATAAAGGACAAGGGCTGGTTCCAAAGATGGGCCAATGTCGATGATTTTGAAGAAGAGTGGAA  
AGACACAATTGAGAGGGATGACCTGGTAGATGACAATATTAGTGTCTACGAACACGAACACGAAAAGACT  
TTCATTTAAGCTCTCCATAT

>Positive Sample 28

AACTATCGCACTATCGAACTTTTTGTTTCACAGGGAATGGAAGAAAGGGCCTTTATTTTTTACATTTTTT  
TAAGCCATAACGGATTTTAGTTACCGAGATTTTCAATCCTATAAGAATTACCTAACTATTAAGCGGA  
CCCATCTAAAACATAACGTTCCGGCAAGTAGATGTATTGTTCCAAAAGGCAATACATCCATAACGGGTG  
CCACCGATCTGTAATGAATGCTCCGTAATGTTTGGGGGATTCATTAATTTACTGCTGGAACCGAGAGAG  
AAACACGACAGAGCAATTCA

>Positive Sample 29

GTGGTAAAGGCACCTTATAATACAGCTTGGTTCTATGTATTAATTTTCAGACTATTTTATGGTCTGCTTTT  
TTTTACGGTCAGAGAAAAGATGAAATAGATGCCACAAAACAGGGATATATACGAAAACAGCATCTTATAT  
ACTTTTTTACTCCAACATTAATTTCCAAAACAGGTGAGATGAGGTAACCCATTCGAAAAATTTAAATGTT  
CAGACACTGTCAAGTTAAAGAATATAACCTGGAGGTTTTCTTTTCTTTTTGTCCATCAAAATGCACTTTT  
TTTGAAAAAAAATGCCTTGT

>Positive Sample 30

GCTTCTTCCCACAAGAAGAACAAAATAATAAAAAATATTTTGTAGAAATTTTTCGTAACAAAAGGAAAAAC  
TATTGAGTTTAACTTATGAATGTACTTTACTGGCCAAGAATCCGTCTGGAACCATTTCTACGGTGCTCTCT  
TCGTAGCGCTAAAGACAGCTATAGTGGATTTTACAGACGGTATTGAAAATCACTAATGATATCAGTTAACA  
AAGTAAGAAACATGTTTCGTCAGATAAGTTCTACACTGCTGCAAGTGCATACAATGCTCGTTTTTATAAA  
GTCCTAAATTATATAACCCT

>Positive Sample 31

TTAAAGAGTTGAATTTTACGGTGAAAGTAAATTAACGCTACTTCTGTTGTTTTGGAAAAGCCAAGTTCAA  
GTTTTCTTTTCTTGATTATTTATTTCTCGTAACGATTTTCGCTTTTCTCTCTATATATTTTCTACTCCATT  
CTGTAAAGAGCTTCCAGAACAAAATATAAATAAATAAAAAAACTTCTCTTCAGGCAAGAGTACGTTCTT

CGCTGGTTTCCTACAGAATCAAAGAGTACTGCAGCTTATTGTACACACTTACAATATTCAAACATGTG  
TGGCCTACTCGGTTCTGGC

>Positive Sample 32

GGATAAAAGTTTCAGTTCCTGTTAAAAAAGAATAATTCTTACTGAGAATGAAGTATTCAAAGAAATTTAAT  
ATTTTTGAAATATTTTTGGGATTGCGCAAACATATGCCCTCTCAAAGCAAGACAAAATTTAGCAAAC  
TTTATAACGATTACACCATTATTTTCTCATAATTTTCGCTAGACATTTCTACAGTACTTGTGGACGTTGG  
AAATGAAAGACATAGTATGAAAAAGATGATCAATTTTCGCAATTGGTTGAGTAAATTTTCAGGTCTTTTT  
TGGGGATATTTTTCAACTGA

>Positive Sample 33

ATTCTGATGAACAGCCATCTATGGAGCACTTTTTACCAATTGAGAAAGGCTTAGAAGAATTAATTTTTG  
TGGAATCAGGTCTTTAAACGCACTAAGCACTATCTCAGTATCTAATGATAAAATTCTTCTTACCGATGAA  
GCAACAAGTTCCATTGTTATGTTTAGCCTAAATGAGCTTTCTTCTTCTAAAGCAGTAATAAGTCCTTCAA  
GATTCAGTGACGTTTTTATTCTACACAAGTTACGGCAAATCTCACAATGTTATTGAGAAAAATGAAACG  
TACTAGCACTCATTAGTAG

>Positive Sample 34

AGATATTTTCGCTCTTGAAAGCTATAGAGATTAATTATGTTTTTCCCTTGGTATACCTTTTCTGTGTTGT  
CTTTCAGTTCCTGTCTTTAGGATGTTATTTATCGATCTTTTTTCAGAAAGACCAAAGCGAAGAAGCGAAG  
AAGAGGACTTCTCTGTACTAAGACCAAATTATGTAAGGAAACTAAACATGAATATGTGAATTTATTT  
CCAAAACACAGCAGAGCTTAAAGATGGGGTAAACTCATATTCATATTCATATACACGTATGTATATAAAA  
ATTCATTTAAAGGATTGCT

>Positive Sample 35

ATATTGCTGAATTATTAATCACAACTTCCGGTATTAATATATGCGGGTGATAAGGATTATATTTGTAA  
TTGGCTGGGAAACCATGCTTGGTCCAATGAGTTGGAATGGATCAATAAACGTAGGTATCAGAGAAGGATG  
TTAAGACCATGGGTCAGTAAAGAAACAGGTGAAGAGTTGGGACAAGTCAAGAAGTATGGCCCTTTCACCT  
TTTTGAGAATATACGATGCCGGTCATATGGTGCCTATGATCAACCGGAGGCAAGTTTGGAAATGGTCAA  
CAGTTGGATTTCCGGTAATC

>Positive Sample 36

TAAAACACTTGGAAGAGAGAATATTTGGCTTAGAAAAATCTCTTGAAAAAAAAAAAAAAAAACAGGTAAGGGC  
TGACAGCGTTAGATTAGACTTGAATAGATATACTATCGACCAGTTTTTGCATTACTGAAAAGCCTCAGC  
GAGGTTTTGCAATTCACAATGTTTATGGCAATGATTTGAAGGAAAACGACGATAATATTATAAAGATTG  
AAACCTGCTGTAGTGCCTAAACATGAAAAATTGTTTGAAGACTCCTCATTTTCGTTTACAAGAAAACAG  
CTTCAAGAGGCAATTGGGCC

>Positive Sample 37

TATGTTTAGCTATAAAATTTAACTTTTAGAATTTTATTATATTATTTAACTTTCAAGAAAATTTTCTCAT  
CACTCATCCCAAGGACTTCAAGAAATAGAACAATGCATCATAAGTTTATGAATTACGTGCATTTGGACCT  
TCAAAGAATAAAATCGAAGTTATAGTTAATTATATTAATTAAGCCAAAAGTACATATATCTAAAAGGAA  
AAAGTATAAAATTTATGCAGGTCCAAGACATACTTAAGCCTTCAAAGAAGAAGCTTCTCTTTCTGATT  
TCGGCCTTTTCAGCCTTTCT

>Positive Sample 38

ACGTCTTGAATAACACCATGTGAACCAAACAGCTTTGTCTCAAAGGGATGTGAAATTTTGGACTGTCTTA  
TTCTAGTAGAGCCGTGTTTTGTTCTATCGAATATGTAGATTGCACCATCTGAAGAGGCGCCGGCTATAAT  
ATCTGGATTTTGGAGGCAAATATCTTGCCTATTGCATTCCCCGTTTGGGAAGAAAATACTGATGTCATTT  
ACTAAGTGTGGAGGGAAACCTTGTGAGTCTCCGGTTTGAATTCCATTTTCGTCCATGTCGAAATTAT  
TTAAAGATGACCATTTTATA

>Positive Sample 39

GAAACAGCGTGATTTGTAATAAAAATAAATAAGGACATATATGTATATAGAAAGTTGCTTAACTTTTTA  
GACCACTTGGAATATTTTTATTTATTTTTCTTCAAATGTAAGTTGGGTACCTAAGCTTAAATTCA  
CCTGAAAATGAATTATATGAAAGATTTTACACCACATGTAACAAAACGTAACAAAAGCCAAATTTTC  
CACTCAATCATAATGCATGAATTATAGGTATTTTAAAGTTATATTGCTGACGTAATAATTCAGAAGAGACTA  
CAAGAAAATTTCTGAACATA

>Positive Sample 40

TTATTTGACCAAATATTATTGATGTTTATTTTTTTCTTTTTTGCATAGCCTTTCTACATTTTCATGGCTTT  
ATTTATTTTATATTTATTTTTTCGTTTCCTATTTTTTTGCATACATAGACACTACCTTTGATTTTTGCTTGT  
AAGATGTACGATATAAAGTATACTATGAAAAATTTGAAAATATTGGTCTTAGTTACTTTTTCTGGTTTGT  
TTTATCAATTCATGTAGCAGTGTGCACGAAAATCTAGTTACGCAATGTGAAATCTAGAAAACCTTCTACA  
ATTTGGAATTATCAATCACC

>Positive Sample 41

ACACGTCTGAAGAGCAAAATCTGAAGCCGTTTGTAGCGCTTTGCAATAATAAAGACTGTGGGTGTGTTAA  
CCACTTGAAATGTCTTCACAGGTACTTTCTAGATGATGAACAGTTGATGGTAGGGAGAAGAAATTTGATA  
CCTCGAGGTGGGAAATGTCCGAAATGTGATATGTTTTGCGACTGGACGACCCTAGTCAAGTTTTTCGACAA  
GAATGAAGTTAGCTCACGGGAAGTAGGGCCTGACACAATTTTCGGTTCTTTTTTTCTATAGATAATGGT  
TATATGTTATATTTACGGAT

>Positive Sample 42

AAAGTGTACCGAGCACTGTGCCCAGAAGCTAAGCTTTTTTCGCTAACATATATATATATTTAGGTAAATC  
ATTTACTTTTTCGTCGATCTAAAAGCTCATCGCATTTTTTCGGTCCTGATGTTAAAAATTTATTTTCGTT  
TATTAATAAAAAAAAAAAAAACATTACTGAAACGTATAAAAGAAAAGTCTTAATCTATAAATATGGTTTTATC  
ATAATTAGACTGTTTTACTCTGTCCATTGGTCATTATAAAGCCTGAAAATACCCACTGAATGGTTTTTTT  
CGCAGGAGCAAACCTTTTTCC

>Positive Sample 43

AAGCAATTTTACTTTCAACTGTTTAATATTTTTTTAGAGGCTACTCGGCCGGCCATATCTAGACAATTAGT  
AATTCGGATGACAAAGAGTTTAAAACCACAATATCTGCCACACATATCGTGAAAGGCATTAGTTCCATTG  
TCTCCGTATTAGTGCAAAGCCCCTAAGCCAGCCTGCTTTAAAAAATGTGCAGGTACTTTTGTATTGTTT  
TGATATATAAAGAACTACTATTTGCTAATATGTGATGTAGCGCAGAGAACTTGCATTTCCCTGCATGGT  
GACCTTGACAAGAATACAAT

>Positive Sample 44

TTTTTTTATTTGCATGATATACATATACTATTTTTTATTAGTTTCTTATTCTACTATGTATTTACGTAAC  
AATAAATTTACAGGTCTCTCTTTTTGTAAAGTATCTTGCACGCTGATATCTATAATACTACTTCACAAGTT  
GATCAGCTTCCGAGATAGACATTTTATGTATCAAGTCGCCATGTCCGTTCTCTACTGGCCGGTGTATATT  
ATGATATTTTCGACCGTTCTAATACATAAGCACCCGCCACTCTGAGGAGAAGACATTTTTTACAAGAATTA  
CTAGCCATATTTCCCTTGT

>Positive Sample 45

AACATAAGGAAGGCGAACAGGCAGCGAATCAAGCAAAACAATTTCTTGAGCCAACTTTAAGCCTCCGTTA  
ATAAGATCAAGTTTGGTATCCTTGTAATAAATATGTGTGTACGTGGTTAAATAGTATGTTTTTAGCATA  
ATGCCTTATTTGTACCAACAAAAACATGATAGTTCCACATATCTTTTCGCCTGGGGAATACCAAGTGG  
GACAAACAAAACGTTAAAAATTAATCCTTTAGAGTACCACAAATTCGCAAGAAACAAGATAGTTGAATT  
GTCAATCATGGCTAAGATAA

>Positive Sample 46

CGATGTAAATCTAAGATAGCTGTCCTTACTATATAAATATTTGCTGCGGCCCTTTTTTAACGATTTGTAA  
AGGATTACAGCAGTTCGTTATACTTGGCTGATAGCGTTAATTTTGCATACTTTTCTTATAATTGGTAATT  
TTCCTACGTATTATACAGTTGTACGTATACTTATATAACAAAGTTCATGTGTACTTCATATTAACCTCAG  
CGATACCCCTACAGATGATGTGCCAATCCATAGTTTTGTCTTTTTTCGCGATTATAATGCTTTTTCCACCA  
TTTGAAGAGCTCATATACGA

>Positive Sample 47

TCCTTTAAAAGCAAGAGCCTTCCCCCATTGAAATAATCTATTGCAATGAAAACAATGGTTTCATAAACA  
TAAAATCCTTAGAAAGCCCCACTGACGATAGCATGGAGGCGGACATTTACATAGAGAAATGGCTACAAT  
CCTGACTAGAAACAGAAACAATTTGGGTAAGGTTGCCATTGATAAGAAAGGCGTTAATAATCATTGCATA  
GATTTGAATGAGCTGAAAAGGGCCTTGTGCGCAATGAACACAAATTGGATAACGATAACTCAACACGGC  
ACCAGAACACATATTCACCA

>Positive Sample 48

TTATTTTCATGGTTTTTTAGGCGGAAAGAGTTTGGACGGCTTGTCTCTCCTAATGTGGAAGAAATTATGTTT  
TGTTATGAATCTGAAAAGAAAAATACTATTTTAGCAATACAATGAATTTAAAAAGTTACCCTGTACTTTA  
ATCCTTCAATTAACACTTCTTAAAATAGTATATTTTGAAGATCATCGATATATATACAGAGGCAGTTT

TGCAAGGCAGATAACGTTATTGAGTTGTATGTAGGCTGTGTGATTTAATCTCATAAATCAATAATGGAA  
TAATTTTCTTATTGTAAATA

>Positive Sample 49

AAGTCAAAAGGCCATGTTTAGGGTCAAATTGAATTTCTTATGGAGTTTTACTTACAACCTATTTGCTATC  
CTTTTGGCGGCTGGTGCCTTTGTTGACTTTCATATTCCACCAGAGTATGCGGGTTTAGGGGAACTAGTTA  
GTATCCTCCCTGTAATTTTTGTAGCTATACTTCTGCGTTATGCAAAGATTTAGTCCAGGTACTGCTGCTA  
TTTGATTGTAGATTTTCTTTTTTCTTTTCTTTTTTTTTTTTTGACGACTCTGTAATACTCTATTTATTATT  
TAGTTTATGTTTTCTATTTAA

>Positive Sample 50

TGTGAGTGATATTCTTAAGTCTTGCTTTTCGAGGGTGTAAGAAGCTATGTTCTTCAGGCGAGATTATTCT  
ACTCCTGCCTTACTTGTGTAATATTAGTTCTGATGGTCATGATAATTCTATATACAGTTACATTAAG  
TATATACTTAAGCGGGCAGCTTACTAATAATAAATTTGTGGCATTTTTGTGGGATATGAGAATCATGTA  
TCGTTGATTTACAAAGCGAATTTACGTTACCAGGAATAGGGAATACTCTCTTGAATTCTAACATAAGCAC  
AGAAATGCTGAAAGAATACG

>Positive Sample 51

GCACGGCACTTGCCTCAGCGGTCTATACCCTGTGCCATTTACGCATAACGCCCATCATTATCCACATTTT  
AATATCTATATCTCATTTCGGCGACACCAAATATTGTATAACTGCCCTTAATACATACGTTATACCCTTT  
TACACCATATACTAACCCTCAATTTATACACACTTATGTCAATATAACCACAAAATCACCCTAAAATC  
ACCTAAACATAAAAATATTCTACTCTTCAACAATAATACATAAACACACTCAATTGCGTATCTATACCAC  
CATGACGTCATTAACGTAAA

>Positive Sample 52

AGAATCAAATAGGTGTATCGCAATGGAATGTAATTTCTTAAGTATTCTATATGTACTTAAAACCTATTA  
TATATGGATCAACACAGTATCTTATGAATGGGTTTTGATTTTTTTATGTTTTTTAAAACATTAAAGTT  
TTCGGCACGGACTTATTTGGAATTCAAATTATTAATGAAAGAACAATTAATAATTAATGTACTTAGTAT  
TTGGCCATTATTATCGATTTTCGGGGGCCAAATCTAACCAAATTCACCTACATTTTTTCAAATTGATTCA  
AACACCTTTCACAATAAGAT

>Positive Sample 53

GGAATTCAAATTATTAATGAAAGAACAATTAATAATTAATGTACTTAGTATTTGGCCATTATTATCGAT  
TTCGGGGGCCAAATCTAACCAAATTCACCTACATTTTTTCAAATTGATTCAAACACCTTTCACAATAAG  
ATTTTTATATCTAGCGCACATAGAATGAAATGTAACAAAGATTTTCAGAAAAATCGTCATTCAAACCTGT  
ATTAGACGAGGGACGGAGTGATTTTTGTGTTTGTTTTTATTAATTGTGGGATAGGATAGTAGCAACTCTT  
GGAGGAGAGCATTGTACGTT

>Positive Sample 54

TAACCTACTTCAACATGAAAGCCCGACGTTTGAATGATATCCTCTTTTTACCCGATTATTTTCATTTA  
TTAGTAAGTGGGGTTCTGGGTGAAAAAATCAAACAAAAATATGAATTTGTAATGATTTTTATATTTTCG  
CCGGAGGTGCTGGAAATGGCAAACGAAAATACTATGACATAAAAGCTGGGCACACTATGTACGTTCTTTT  
TAATTTTTTATCAACATGAGAAAAATTCATGAACACTGTACCTTATATTATCTAATAAATGAAGTAAGCT  
TTGCATCTCCGTAACAGCTG

>Positive Sample 55

GCTGCATATATATAATTAAGCGGGAGCTTTCTTTTCGATCTCTTTCATTCCATATGTTTATTATGTACTGA  
TGAAAAGCATTTTACTAAGTTGAGGTCTCTGTAAGTATATTGTGACCATTATGCTAAAATACTGGGGTCT  
TCATTTGTGTCAAATTCTACGTAATAGTTCCCCTTTTTCTTACATTTTTATACTAAAGAGTTACGGTATT  
TATACAAACGAGGGGCTTTACTGTAATATATGATTAAGATTCAAGCTGAAACATTCTAAGTTAGAGGTAT  
AAAATGATTATTGATGAAAG

>Positive Sample 56

GCTGGGAAGATTATTACGGAACACATTCTTATAAATCTATAGGAATACATAGGATTGTATTTCTATTGAC  
AAAGTACAACCTATATTTTATGTTATGTTATGTTATGTTTGTCTATGACTATAGTTGCTTTTTCTTCACTTA  
GTAAGGATTAATACTCTCGAGCTAGTAAATTTGACGTGAGAAGCATAATTATATTAATAATAAGAACGA  
TATCTGGTGTGTTTTATTACAGACTGCACTGAGTGTTAGAGGTAGAAATTATAAGTTAAAAGCAGTAGT  
TTATGCTTTTATGCTCGAGTA

>Positive Sample 57

ACTAGTGCTTAAGTTCTGTTGACGCACACAGTACCTATCTTTGATTCTTCGTGCAAACAGTATTCCGGC  
ACGTTAATTGATACCAAAAAGATTTCAAATCAGATGCTTCAAGACTAATTGTATACTTTATGTGACTTC  
TGGAGTTTAATTTGTTGATTGATGAGATAATATTGTCTATTATATTGCCAATAACAACCAGCGCCAGGT  
GTACTAAGTCGAGATGACAGAAAATTTATAATAAGTGTAATACAATAAATTTTGAAATAAATAACTAC  
TTCAATAGAAATCTCAAAGT

>Positive Sample 58

GCGACGCCCCGACGCCGTAATAACTACTTTTCGACAGACCCTTATGACAGTATTCAGGCCGCTCTTATAA  
AATGACATGTTAACAAACAGTTCTGATTATTCGCCTTTTGACAGGACGATAATGTAAATAGTTGTGGTAG  
TATCATTAGGTATGTAAGTGTACTTTGTATCGCTTGAAAAAATAAGCATTTCAGAGCCTTCTTTGG  
AGCTCAAGTGGATTGAGGCCACAGCAAGACCGGCCAGTTGAATGCTCAACTCTTCAAAGAAATTCCTC  
AAATATGTCCAGTTTCATGT

>Positive Sample 59

AAGCTTAACTTCTTCGTGAGGAAGGAAAGTGTTGTCTCCTACTTTTTTCAAATTTTCGAATTGTATTTAT  
ATTTATTTAGTACTTCTTGAGTTTACATATCCTTCGTAAAAATGCAACTTTTGTGAAAAACACTTCCAA  
AAAAAATAATAATGAATTTATGAAGCATACTAACGAGCGAGCACATCGCTGAGGTATCATTACTTCATG  
AGATAAATTAAGATCTCCTCATATGCGAATTTCTGTTCAGTGATAAACGTTGATTACGTTATTGATAAA  
AGTCTTTTCTTCTGGCAAGG

>Positive Sample 60

GAATTCTAGGTGATATTGCAATTACTTCTTCTCATGCACTAACAAAGTGAATGATAGAAATATGTTGAGTT  
CCTAACTGCCTGATTTTAAATAAGTTTCATATTATAATCTTTTAGCATATATATATATATATTGATCCTC  
TCTCTTCTTTATTTTCTGCCAGTAACCCATGTGTGAAGAAGAAAACATAAATAAAAAAGCAGTAGCACAT  
GGACACATTCACGCCCGAACACTCCTAAAAAGCAGCCACACAAGAAAGTAGATATAATGTAGGACACCC  
AGCTTGCCATAATTGCTAA

>Positive Sample 61

CGATCAGCGCCAAACAATATGGAAAATCCACAGAAAGCTATTCATTGAAAAAATAGTACAAATAAGTCAC  
ATGATGATATTTGATTTTATTATATTTTTAAAAAAGTAAAAAATAAAAAAGTAGTTTATTTTTAAAAAAT  
AAAATTTAAATATTAGTGTATTTGATTTCCGAAAGTTAAAAAAGAAATAGTAAGAAATATATATTTTCAT  
TGAATGGATATATGAAACGTTTACTGGTGGAAAGTTTGTCTCATATATTATTATTCAATAGAAGTAATAAA  
GAAAAAGTTGGTAAAGCAAC

>Positive Sample 62

TAAGTGTATAACCGTACCTTGCTTACATCATCTATATTTTCGTAATCATTTTTGTACATTGTTTATAT  
CTTGTTTTGAAGTTTTAGCTTTGAAAAACATTTAATTGCGAAGTAACATAATGTTATTAATAGGTACGA  
CTGAAACAGCCATTCTATTTAAACATATAAAAGTACGATTAGTTGGTGTGGTTATATAAGTCATAAAATA  
ATTATCATATTAATAAATGAAAAATAAAAAACTACTCTTTTTTATTTCATAGTTCTCGTTATTAGTAG  
GTCGTGCTCTTAAAAGATTA

>Positive Sample 63

TATCTTGTCTCGTTATGATATTTTGTGAGATAGGTATCCAAAATTAATAAGAGAAAATGTCGTATTGTGT  
TCACAATTCACCTGATTGTTTACTAGTCCAACCCCTGGTATAATTGTCACTTAATATATTCTTAGCTTC  
CAGGTGATGTTTTATTCCATTATTTATGTTATGTATATATAATCGTAACTCTTAGAGCAAAAAGTAAAAA  
AAAAGGTGGTACTTACCGAGGGAGAATATATACAAATTTATTCGTAAATGTAATAATTAATTGAAGCAG  
AGCTAAAAGAAAAATACAAG

>Positive Sample 64

TGCCACTGTATAAAGATGTTTCAGAAAGATGCATAAAATCTACTGCAATTTTTTACTTTTAGTTTGTTAAA  
TTTTAGTTTTCGTCATATATATAAAGTTTTAAAAAGGTACAAAGAATGCAGTAATAAGAAATGTAATTACA  
TGAGGGCAGTTAAGTGCTACCTTTTAAAGACGGAAGAATAATACCATAACCGAGAGTAATTACGCAGAC  
AAACGCTAACAAACGAAGCAGGAACACCTCTGGAGATAAAAGCGCCTACAGTTAGCCATCTATTACCCTTT  
TTATCGGTCATAGAAATAGC

>Positive Sample 65

GCCTAAAGATACGGTAATTGAAACGTTTCCTATGCACAATCTTAAACCTTTTTAGGTAATTGATTAAGTT  
GACTGTAATATCTGTAAGATTACATCTAATTTACGTCTGGTTTCTTATCAAAAAATATTACTACTGT  
AGTTATGCAAGTATTCTTAATTTTTCAGTACTAAACATGAATATTAATTTTGTGAGCGTACAAGAAGCA



AAAGGAAGTCATCTTTCTTTGAACAGTTCTGTTTTTAGGTAAGCCTTGGAACCTTAGCTATACTGACTTG  
ATACGCCCTGTCTTTGTTGT

>Positive Sample 66

TCTAGAGGGTACAATAATCTGGTATTACAAATGCCTAATGCTGCAAAATCCATATGCTTAGAAGGTGCGG  
TAGGTAAAAACACCATAGAGTAACAAGTGAAAGGATAAGACCCAAATTCTTTGAGTAGAAATCTATAAT  
TTTTTGGCAGACAACTGTCGAATTTATAACTGTTAACTCATCTGTTTCCCTGCGTCGGAAGTGTGAAAATT  
TGAATGGGTATAATATCCGAACCAATGTCGTCATCCATAGTATCGTTAACATTGTCCACAACATTCTCTC  
TCAACTTGTCTTCCTCTACT

>Positive Sample 67

TGGGTATTTCCGTGTATATGGTAAATAATAGTAGTATCTTGTCAAGTTTTTTTTTATGTTTTTCTTCGCGCG  
TCAACTTTCTACCAAGAGAAAAACAATATAAGGTCTCCTTACTCTATAGGAGAATAAAACAAACAAAAAT  
AAAAAGCACATCGTAGCGCCAAGAAAATACTGCAAATACCAATACCACAATAATACTACAATTATCTAT  
ACACAAGTGTTTTGCCGCTTAAAACTTCGATTTTCATAGTACGAACTATACACCCTGGTTTTTTCTCTT  
TTCTAAATACATATCTACCT

>Positive Sample 68

AAAATAACGGCATTATCGTACACAACCTGGTTTTCTTTATTGGTTAAGTTGTCTTTATTCAAAATTTTTTC  
ATTACTTCTTATAAACAGCTTCTTGACGCTTGTAATTCATAAGTTTTTTGATACAAGCAATGGAAACAAA  
ATTAAGAAAATGTAGGCAACGAAGAACTAAATTTGAAAAAATAAAAAAAAAAAATTTACTGCCAAGATCA  
TCTAAATTATCTTATAGTAGCAAAGCTTGAGCATAAAAGGATCAATCTTTTAGTTTTTTTATGGCAAAGTA  
CATTGCAGTAAGTAATTAG

>Positive Sample 69

TGCAAACAAAACCTTTTCAATAATAATTTATAAATAGTATCAATATATATATATATATATATATATTTATTT  
GTTTACTTTTTCTATCAGTGTTCATTTTTTATTAACAATGTTTGATTTTTTAAATCGCAATTTAAT  
ACCTAAATATAAAAAATGTTATTTATTTGCAAAAACCCATCAACCTTGAAAAAAAGTAGAACGTTTTTAT  
TTAATTCTATCAATACATCATAAAATACGAACGATCCCGTCCAAGTTATGAGCTTAATCTCCATAAAA  
ATATTTGAAAGCAATAGATC

>Positive Sample 70

CTGGTTTTGGTTTTGTAGAGTGGTTGACGAATAATTATGCTGAAGTACGTGGTGACGGATATTGGGAAGA  
TGTGTTGTACATTTGGCCTTATAGAGTGTGGTCGTGGCGGAGGTTGTTTATCTTTGAGTACTGAATGT  
TGTCAGTATAGCTATCCTATTTGAAACTCCCCATCGTCTTGTCTCTCAATGTTTGTATATACT  
CATATTTCTATGTGTTTATACAATTGCTATTGTTTATATAATGTAGTGACATTTTCTCTTAATCTTATAC  
TAATTTCTATGACATTTATA

>Positive Sample 71

CGTACGCCCTGGTTAAGACTTGGTATAGTTCCAATAATTGGAATATTACTGCATAGTGGTCCAATAGCAG  
GATTTAGCATAAACATGATAATTTAGAGATGCTTTCATCCCTCTGACGAAGGTGGTAGAGAACAAGAA  
AATGAATAACATTATATCATAATTCCTATATATATATATATATATATATATATATATATATATATATAT  
ATCCCGCGATATTACAGATAAACATTACACCCGCATGAATGTGAGCCACTACTATATTATAACTTAGTG  
AATAAAGAGTGTTACAATAG

>Positive Sample 72

TCCTTTATATGCCCATCTTGTTATAAGGTAGTTTTAAATTCTAAGTTATTCAATACTACTGACTAATCATT  
GTTAATAGCAATTTGCGAGTCATGTTGGGCTCAAATACTATAGTCATTTTTGTGATTTTTTTTTTTTTAT  
TATTTGATTGAAGAAGGAACAATTCGAAATATGGAGAAAACGTAAAAAATGTTAGAGTTATAATCGAAA  
TTATCCTAGTTCAGATACTGAAACTTAGGCATAGGTGTAGTACAAAGGTATTTCCCTTTACATATATATT  
TGTATATGTGCATTCTCTTT

>Positive Sample 73

GATTTCTCAAAAACAAAGGTGCAATTACATGTTAAGCACCGAATTTCTATGCGAAACAGGTCCGTCTCAT  
CAGTCATAGCTTTCCAAGTATATAAACTTGAACGCAAAGTGCGTCATCGACGCCTTTTTTTGCGCAAG  
GATTGTTACTATTCATTAATGAACTCTGATGTCTTAATAAGCCAATGGTATCCATAAGTGAAGGTGAAG  
TCTACTGTGTTACATTAGCAAGTCAGAACTCCTATACGATACAGTATACTGCATTATGGGCACTAAAATA  
ATTTAGATTATAGAAAATAT

>Positive Sample 74

AGTTAAGAAAAAGTCTAAAAATGGTTTTTTTCATCCAAAATATTAATTTTACTTTTTATTACATACAACT  
TTTTAAACTAATATACACATTTTAGCAGATGCGCGCACCTGCGTTGTTACCACAACCTTTATGAGGCCCG  
CGGACAGCATCAAACCTGTAAGATTCCGCCACATTTTATACTCTGGTCCTTTAACTGGCAAACCTTCGG  
GCGTAATGCCCAATTTTTCGCCTTTGTCTTTTGCCTTTTTCACTTCACGTGCTTCTGGTACATACTTGCA  
ATTTATACAGTGATGACCGC

>Positive Sample 75

GCTGATGTTATCGACACAATTATGTCCAAACAGGAACCATAAATGTTCAAACCTTTATAAAGATTTTATA  
TTCAGAGTTTATAAGGTCTAGCTTATATAGTCAGTATTTTAAATTTAATTATATTATAGTTTATCCTATC  
TCACCGTTTTAGCTTGTCTTCTGCGCCCAAACATAAAAAATCAAGAAGCGCGGATAATTTATGATCAGCTC  
AGCGGGAATGTTAATGGCAGATACTTAGAATTTGGTGGAAACGATTTTCTTCTCTAATCCTCATCAGAGG  
AGAGGTAATCGAGCAAGGGA

>Positive Sample 76

CGTCGCTTGTTCACAAGATTACCAACGCCAGCCATATTGTAACATAGATGTATAACTAGAACAAATTTAC  
CACATATACATAACTATTTCTTATGTTTATTTTCTAAAATCCTTTATCCAACCTACAATCTACTAAGGCT  
TAAGCTATTTTCTTTTCATTATTTAATAACTGTTCTTTTACAGTTTACAGCTCCATTTATATCCGGTTAAT  
TTTCTATTGCTACCAACGATTCTATGGCAAGGTACTAACAATGCCAGGTTATTTGAGCCGCAAGCTCTTC  
CGACAGATCTTGCAGCAGTT

>Positive Sample 77

AAAAATTACGTAACGGTTTATAGAAATTTCTAGTATGAGAACAGTAATATATGAGAAAAAGTTGTTTTTAC  
TTTGTGTTTCGAAAAAATAAGTATTTGAAAACGAAAAAATAGTTTGTATGTTTGTATATAAGTTGTTATTA  
TCAAAAATTAGAGGGAAAAAGTAACTAAATATATATTAATAAAAAAAAAAAAAAAAAATAAATGTATGTTGGAAT  
GAAATAGCGTAGTAAGGATAAAGGTGTAATAGATATATATTATAAGAAATAATCCGGTGTCTTCTGGTG  
ACGGTTGGTTCACCGGTCT

>Positive Sample 78

GCTTTGGCAAGAAATGATTCTTTTGTACTTGGAGTAATGGTTTCTTGGAGTCTTCTTGTTTTTGTAACGG  
GAATACTTTCAACAGTTTATATATAGCATATAAGTAACGACCGTGCACATATTAGGGTGTTCATATCTTG  
AAAAATCTTTATGTTATCCATTTTACTTTAGGGGAGGTGGAGCTTAATAATAAAATTTACATAAGAACAA  
CAATCTGTAAGTAATTATAAAAATATATTAAGGGACATTTTAAACCCTACTTTAAAAGTTTAACTACATC  
AGTGGTTCATCAATCAAAGG

>Positive Sample 79

GAAGCCAAATTTGACGACATTTTAAAACGATATAAATGTTACAATTTCCAAAATGCTAGATTATTGATAC  
GGAAAATTTGGCAAACGAGGCTGATGGCATCAGTGAGCATGACCTGGTCCACATGATTGACGAATTAGA  
TTACAATATTAATTTTGCCTGAGCAGCATATATTTCTTTCCCCGCCCTGGGTGTCTTAAATTTATTGT  
TTCACCACACAAACATATATATGTTCTTTTTTTTTTTTGTAGGACGTACGGATTCAAAAACAATTTATAC  
CTATACAATGTAGAAATGCT

>Positive Sample 80

TGTTTAAACATATTTCTGTAGGGTTTTTTTTTTTTTTTTTGTACAGATTAGAAACCATACAGTGTAACCA  
TTATATAGGTCAATTAATATATTTATAGATCATCCTGTCAATTTTTTTTTTTATTTTTTTTTTGC AAAGCTCC  
CTTTTTCTGAAACCAACAACAAAATATAAAAAAAAAAATGATAAGCAGGATTTTTCTTTAATAATTCC  
TTAAAATTAAC TAACAAGCTGAAGCCCTTACAACAAAGTAAGTCAAACCAATTCACAAAAAAAATCT  
GTTTTATTTT CAGATATGCAG

>Positive Sample 81

GAAATTTCCGAAAGTGTGAAAAAATTGGATTTTTTTTTTCTCCTATTGAACTCAATGGAAGCTATCAGTT  
TGGAGAGGGACAATTATTTTCTTCTTGTTTTTTGGCAAGAGAACAATATTGTAGTATTTAAGTTCTAAT  
TTAATGTTATATACTTATCTAATAGTTTTTTTTTTTCAATTAGATTGTTTTCTTACGACGTTAATCC  
CTTGTATCTTCACTTACGAACTTCGATGAATATGACATACGTAATCGGGAATGTTTTGTAAC TAATTG  
ACGTAGTTCCTTTTTTCGTAA

>Positive Sample 82

ACGACCGAGGTCCTACAGCCTCCCTTTTTTCTTATTTTACATATTAATATACATAAATATAACCATAATGC  
ATTCTTTTTCTAATGATTAGCTCTCCTTTTTTTGACAAATTTGAAAATAAATATAAAAAGGGCCATAAA  
ATATTGAGTTAAAATTGACGATTTTTTTTTATAGAAATGACTTGAATTTACGATTTAAAATAAAAATATAC

CTGGCATATAACTAACTATACAAATCATCATCTTCTCCGCATTAGAACCAAATGCAGCACCTGCTCCAC  
TTGGAGCACTATTATTACTG

>Positive Sample 83

GCAATAATTTTATGCATTTCTTCTATCTATTTTCAGAAGTAATTGACGTGATTTTTTATAGTTTTGCTTTG  
AATCTTTGTGTTTCCACACCGGAGAAAAAAGTTTCATGAAGTGAAAAAGCGGTTAAACATGAATTTTCT  
ACTATCTAAAGATAAAATTACAGATGCAGTTACTTACATACATTGAACAGTTTCTGACGGCAAATTTAGC  
TTCTATTAATTTTTTCTGTAGCTGATGAAAAATTCTGTCCCTATGATGCGCCAATGGGTCATCAACATC  
CGTCGGAAAAAATTCATTTT

>Positive Sample 84

CGTTAACTCCGGCCATATAAATGTGGTAAAAAAGGGTACTGCGCTAATGGCCTACAAGTGTTCAAAACCT  
CTTCTATATAATAAGTTATAGTGTCTTGTACATATGTCGCAGGCGCGAATACGTGATGTGATTTTAGCT  
GTTTAATTTTAAATTTTGTCTTTTCTTAAACAATTCACGGAAAAATCAACTGAGAGATTTTAAATATATA  
TAAGAAATACTAACAACAATAACAGCAGCTGTTAAGGGATCTTACTTATTATTAGCTCATTATAACTT  
CTCCCAAAGTCTTCTGTTTA

>Positive Sample 85

TGAATAATAGAATGAGTTACATACGTAAACGTGTAGTATTATTATTATTCTATTTCCCTTTCCGTTTT  
TATTATTTATATATATATATATATATATATATATTTGGGTGTTTATATTTAGGTAGGGCATAAGGATTTA  
CTGTCGGCATGAACCTACTTGAACAAAAAATAAAAAATCAAAAGAAAAATAATGTAGGCTTTTGCACATC  
GACTATATATAAATATATATATACACACTTCTGTGCAGAAGAAAAGGAATAAAACGTCAAACCTAATTTAT  
TTCTTCTTGAACGATTCCG

>Positive Sample 86

GAAGGCAGAGAACTCTAAGTTGAAGGAAGCTAACGAAGATCGTTCCGAAATTGATGACTTGATGCTCTTG  
GTTACTGACCTAGATGAGAAAAACGCCAAATATCGCTCAAAGCTGAAGGATTTGGGCGTTGAAATTAGTT  
CGGATGAAGAGGATGATGAAGAAGATGATGAAGAAGACGAGGAAGAAGGGCAAGTGGCATGATAGAGTTA  
AAATATGTGCATAAACAATCGCTTGAACGATCTGTTGATTATGTGGGCAGCACTACTTTTTTGTAAAT  
ATATATGCATATATACATTT

>Positive Sample 87

GTGAATTTTCTATCCGAGTTTTAACTTTTCGATATTCAGAAAGAATAGCCGTTTCATCTCTTTTATATTATA  
TTTAGCGATGTAATGAAAGTAAAAAACAACAAAAAACAACAATAATCAAATGACGCATATCTAAAT  
ATTCCAGAAAAGAATATAAATAACGAGGGTGATAAAGCGGGTGCAATTAATTTCTCTGTAGTACAAAAAT  
ATGTAATAACCGCAGAACTTGTTAGTGAATCTCTTTTAGATGTAGCTTGAAGGCTCAATTCGCTCCCCT  
TCGGTTTGCTGAAGGAAGAA

>Positive Sample 88

AAACAGTGGAATTGCAACAATTATCAAATTATTCACCTAATAATCACCTTTAACATTCAGGGAGGTTTAT  
TTTTGCTTCCGAAATTTTACAGTCTACAGGGAAGAAATAAATTTAGTTGAGAAAGTTTTGTTTATTT  
GTAAGTTATTAATTTGAAAAATAAATACCATAACTAGCGCAAAGCTTATAAAAGAGATGTTTGTGAAAA  
ATGCAGAAACCCCATATATAAAACCATGAAATGTCACAATGGACATGATGTACATTCTTGGAGATAACAT  
CATATTCGAAATATTCAATA

>Positive Sample 89

TTGATGTAAGCGGAGGTGTGGAGACAAATGGTGTAAAAGACTCTAACAAAATAGCAAATTTGTCAAAAA  
TGCTAAGAAATAGGTTATTACTGAGTAGTATTTATTTAAGTATTGTTTGTGCACTTGCCTGCAGGCCTTT  
TGAAAAGCAAGCATAAAAGATCTAAACATAAAATCTGTAAAATAACAAGATGTAAGATAATGCTAAATC  
ATTTGGCTTTTTGATTGATTGTACAGGAAAATATACATCGCAGGGGGTTGACTTTTACCATTTACCAGCA  
ATGGAATCAAACCTTGTGAA

>Positive Sample 90

AATGCTTCATCCTTCTTAACTGCAAAACACAGTCGTACGTAGGGTGTGTTGTTTCATTTCTTTAACCTTC  
GACGGACAGATCTGGGGTACGTTCTAATAAAAAGTAACCGCGCAGCCTATCTCCACGCGAAGGGGTAAAAG  
ATCAAACAAGTCCTTAAGAATATACAAAAAGCTACATAAATATAAAAAAATAAAGGAATTGAGCGTAAGC  
ATCTTTGTATTTGTCTTTACTAGATCAAAATAGCAAATATTTTTTTACTCTTTTTCTTTTCTTAAATAAA  
CGCATTATCAAACCTGAATATT

>Positive Sample 91

ACTCCTTTTCACGTTTTTGCAAGAAATATTCCTTCTTCTTGCCATGATAAAAAGTTGTATTTAGATATTA  
TCTCGATTTAAGTGGCTCTTCTTTTATTTCTTGCTACTGGTGGTTTTTTTTGTTGTCTTCGTCCCAAGA  
CAGAAAAAGAAAAAGAAGAAATATAGGCCAAAAATATAAAAAAACAAAACAAAAGAGGAAAGGGAAATTA  
AGAATAGCAAATGCTTTAATCACACACTTTGCGCTTCCTACAAAATTACGGCAATGATTTTGGATGTAAC  
ACGTAAAGATAAATAGCATA

>Positive Sample 92

AATAACAGTAATTGAAAAGCAATATTAATATAGAAAGCCAAATTTTATATTTCAAATGAATAAATGTT  
GTTTTTTTTGGCAATTTTTGCTCTTCTATATAACAGTTGAAATTTGGATAAGAACATCTTCTCAACGCG  
AAAATGACGCCTCCAGTGAAAAACATAAACTTTCAATGCAGTCTTCGGTACACTTATGAGTAACCCATA  
TAGAGATCGTACACATTTTACAAGGATTTAGAGACAAAGTAATATTCTTCGTTGATATAGAGGTGTTCAA  
TTGTTAAATGCTTTTCTTCT

>Positive Sample 93

TACTGAATCGGAGGTAACAAACGTAGCAGCTGGTGTTTTCATCGAACATGATGAGCTTTAAACAAGGAGG  
AGTATAAACTTTTAATTTTTTTTTTTTACGTTTTGCCTTTTATATACCGATTAAATATTTATATTTCTGA  
CTTTTTCTTTACCGACACCAACAGGTGTAGGCTCAAAACATAAAAAAAAAGAGTATTCTATAAACAGTTC  
TTACGAATAGAACAACCTCTTAAATCCTTTTCTTGCCAAGTCATCGGTTATCTTCAAGTAAAAATTCAGG  
ATGTCAACCTTCTCTCCGAC

>Positive Sample 94

TTCCAATTCAGTTTGTAGTAAACCATGATAGGCCACAAGACATTTTTTTTTCAACTGGGGAGAAATTTAAC  
AAGGACGTCTTTTTTTTATTTAGACGATAAAAAACCAAGAAACAAAACCTAGTAAAGGTTCTTGGAAGCATT  
TATCTGGATGCAAATAATCGTTATTCTTGGGCATGCTGACAATGCTGAAAAAGTTATCCAAACAAAGTA  
GTCAAATATTCAAGATCACTATTAGATCGCTAAACATTAATTTCTCATTTTTCGACGATACTTTTTTTTAC  
AGAATATAAATTCATGTTAA

>Positive Sample 95

ATCGAATATTTTCTGTAAATAATATTGTTTCTTTTAGAAAAATTTGGTTTTCTATAATATATTTATTTCT  
CCATGTTTTAATTTTCTCAGCTATTAATGTTCAACTTATTCTTATAAATTTGTCATTCATTTTTCATAT  
ATATCGTTAATATATAATCTTTGCCTGTTCTGAATCCTTTTTCAACGACCAAACTTTAAAAAAAATAAG  
TAAAAATCTTACATACATCGTAAATGAAAATACTTAGGATTGTAATCATCAATTATACTAAATAGACTT  
TTCAAACGTTCCTTTTTAT

>Positive Sample 96

TAATGTCCAAGGGCTTTCCAGGAGGTGAGTATATTCAAAGCCAAAATAATTAATGTTTTGGTCTGAATTT  
TTATTTTTCAAAAATGAGGTGAAAACCTCCAACGAACTTTTTAATTAACCATCCGATACAGAATTTT  
AAATCATCTAAAGCATTATTTCGGCATTATCCTTGAATAACGTACTATGCAACTCATATAAATACTAC  
AATATACTTTCTCTTTAGGAAATTCGTAGCTATCAACAAAGGTAGTGTCAATTGTATATACTTCCGCCT  
TCCTAAAAAAAACCTCATTAA

>Positive Sample 97

AAAAATTCCTAAAGTTATAGTTCACATTGTTATATATGTATCTATAAAGCGAAATTTTTTAAATTAATT  
GATTAATTAATATTTTGTATCTAAAGTGTTTCACTATATTTACTTAGATTATACATAATTAAAAA  
AAAAAAAACTTTTTCTTGTGTTTTCATTTGTTTTTATTATTAATATTAAAAAAAGTGCCATAACAT  
CAATGTTTTTTTTTACCTTTGATTAGTTTTTTCATTGGCGAAACCATAATCCCCGTTCCATTCCCATCATAA  
CTACGCTCTTCTGAGTTG

>Positive Sample 98

GGGAGTTATCGACAAAGACTGCCAGATATTGAAAAACAGATTACTTAGACACTAACTTATTTTTTAA  
GCTGTATACACAATCAAGTATTTTTCTATTCACTGCGATAAAATTTGTTGTTTTTCAACATGTTAGGTCAAT  
GGAAAGTCATTATTTGAAGCAAAATGAAAAAAGAATATTATTAAGAGAATAAATTTCTTTCAAAAATG  
TAGAGCAAGTTATGTGGAAATCAAAAGAATATTAGTTGATTCTATTATATAATAAATAGTTATAATCATT  
GTATTTGATGATGAAAATT

>Positive Sample 99

CGCCTGAATTGAAGAGTACTTCAATACGTAGTGTACTGTCCAACTCTTCCAAATTTTTAATATTTAG  
CTGGGGTTGGGTAAACAAGTGAGCAAGGGAAAAAGTGAACATTTTAAGAAGAACAATAAAATAGCAAGAGA  
TGGAATGGTAATGCTTGGCTCTCGAGAAGAGTAGCATAAACGAGACTTGTTTTAAACAGGATATGACAT

ACTTCAATTCAGCTTTCCCTATCAGCCGCTCGAGCAGTTATATAGGTGTGTTGCCGGAGTAATTTGGCGG  
AGGCCAACAGTGGCTAGGCG

>Positive Sample 100

GCATTACTGGTGTTCCTAAAAGCGCTAATTGACGTATTGCCAGTATTGCCTGTATTGGTACCAAACCTGGG  
GCATTCCAAATGCTGAAGTGGTGGTTCCTCCTGTCTATTGTGTTTGTCTGTTCCAAAACCTAGGTCTTCCAAA  
TGCACTTCCTCCCATGTTATTGGTACTAGCAGCATTATTTGTGAAAGGGTTGATAACCACTTGTATTAGAA  
AGATTAGGCTTAGCACCCGACGTGAATGGGTACCAGAAAGCTGACATTACAGTTGAGTCGTTGCTCGGGT  
CGAAATTTAATGATAGCTTG

>Positive Sample 101

TTCCTTTGATAGTCTTCAATAATTCTGTTTTTTTCGTCTATTTCTTTGTGTATTGATAAGCATTTCAT  
CGTTTGTATCTGGATTCCCAAGTGTCTACTTGCCTATTTCTTCTGGTGGAAACATTGCTGACACTTCC  
CCTTGAGGTTTTCGTCGATATAGCTATAGTTTGGAAATATCATAGTTGTTTTTCTTCTCAGTTAACACTTTA  
GCCCTATAATTTTCATACAATACGTTGTTTGTACATCTTTAATTCTGAAGGTGAGAACCCTAACAGTA  
TTGCTTTTAAGTATATAAAA

>Positive Sample 102

GGTGGCATTATTTTTATTTTTAGTATTTTTTATACGTGCGTATTCTATTGTTTCATTTTTTACCAATTT  
TTTTTTATTTTTATATTTTTGTTTTCTTGCCTGGAGTTTTTACAGGAAGTTAATCACACAGAGGGTTCAA  
TCTCCAAGGCATAAAAATAAACAATAAATTGTAATAGTTAGCAACTGCAATACGAATTAATAATTTGAGGAAA  
AATCTAGTATTGTTACACGAGCCAATGCTCTGAAGTTTCGAAAGCTAATAAATATCATGTGGAAACTTT  
TCTGAGTCATTAATAAGCAA

>Positive Sample 103

TTTTTCTTTGTCGTTTTCTTCTATAATGAACAATTTACTTTACGGTCTTTAATCGATTTAATGATTAGT  
TGGGCTTTTGGCTACATATGTAAAATTACATATAATATAATGGACACATAAGCAAAAAAAAAAAAAAAAAAA  
AAATAAACAAATGAGCAACCCATCAAATACCAAGAACAAGAATTTAATATAATATATAGTTATTAATTT  
TAAATGTATATATGCAGTTCTGCTCTTATTTTTGTGACCAATTTCTTTAAGTCATCCAAACCGACCTTGCC  
ACTATTAGATTTGCTTGAAT

>Positive Sample 104

GAAATGTGCATTTGAATTTGCGCTTGTGTGAAGGGGTTGGTCTCTGCCCAATGATGTTGTTTTCTTGT  
AAATATTCAATTCCTTTGTGATCGTTTCCTGACGCTTCCTTGGACTGTGTTAATTCAAGAGAATCTCCTA  
AGGTATCCTCAGCATTCAAAAATGGATTAGTATTCTTTAATGTTTCTTTTGTAAATGGTGCCTGGATAGA  
ATGGCTCCTGCTATGAGCATTCTTATTTGGACTTCTTGGCGGTATATCAGGGGCAGAAGTTTCAGCCGTC  
GAAGTTCGTGCGATATTTGT

>Positive Sample 105

CAGCTAACGCAAGTATTGAATTTCTTCTTAAAGTACCCCTAAGTTGAAGAATTCATTTAATCTTCCT  
TGCTTTGTCCCCCCCCCTAGAAGCATAGTTTTGTCTTAAACGCTGTAACGGTCTTGATGCTTATTTTGG  
TGGTAGGGATCGGTTTGCACCTTGAAATGCTATGTTTACTTTATTAATAAATAAATAGTTTTCTCCTCA  
AAACGTAAACAATAAAGTTTGGAGAGACAAAGAAAAGAATGAAAGAGTCTTATATATATATAAGTTAGC  
TGGTAGCATAACCATTTTTTC

>Positive Sample 106

TATGCTTCCAATTCTGATAAGATCAATGAAAAAGTCGGAAAATATAAATCTTGTTTAGAAACTCTTCAAG  
AAAGGATTGCAACGTTGACGAGCCATAAGAATAATCAAGAACTAAATTGAAAGATTTAAGACAAAACCA  
CCAATATATCAGAGAAGGATAAGCGGATTTAAGACAAGTATTGAAAACCTGAACAAAACAATAAATGAT  
TTAGGGAAGAACAATAAAGGAGGCGGATGCAGAATTAATGAAAAAGGTAAAGAGATTGAATACCTGAAAA  
GAGAACTAGATGATTGTTCA

>Positive Sample 107

CTTGAAATCTTCGAAAACCTGATGAGAATTTCTTCAATTTTTTTTTTTTCTTCTTTTATTATTTTTTATGT  
TTATTCCATATATACACTTATAATTTTTTTTTTTTGGCGATTAATATAAGTTTGCCTGGATACACGAACATA  
TATATGATTAATAATGGTTGTCTCGAACAAAAAATTCACTTTTTAGAGGGGTTTCTTATTTATTTCGTATA  
TGTACGTAATTTTGTGTTTGGAAAAATTCACGGAAAAGAATATATATTTGAACAGAATCAAAAATTAG  
GAGGGAGGCAAAGAAAGTAA

>Positive Sample 108

TTCTTCATTTAGATTGTCTCGGCTATGTCACCTTTTCTATCGTTTCACCTGCACATGGCTTTGTCTTGAAT  
ACTGAAGCCGTTATTATAGTTCTATCTTCATGTTTTTAGAGGTTTTTTTTAAATGAGTTTATTAATAA  
AATTTTGAATGTTATTTTGAATAAAAAATATAAAAAAATAATATTAATAATTTTCATTAAGTCTCAT  
GATATCAGTGCATTAGAAAATCTTTTGGTTCCACTTTTCCTATAAAAAATAATTCAAGTTTTATCATTATA  
TCATTTTTAAATATTTGATT

>Positive Sample 109

TGTTGATATAGATTCCAACGAATGTTTCTTCACCTCCTTCAAACAATCAGCTACCATAATACTGGCGCTT  
ATAGTAACTATTCTGTGGTTTCATGCTGAGAGGAAACACTGCTAAAGCAACCTATGACCTGTACACTAATT  
AAAACACTTTTATCCATTTTTTTTCGTATAAGCATATTTTACATCTTTATATATATTTATTTTTTTTTT  
TTTATTTTGGTAGAATAGATTACATATACAACCTTTTTCATAATGTCAAACCTATAGAGTTTTATTTACAT  
AACGGAAGAAGCCTATTGGA

>Positive Sample 110

CACTGATTGTGAAAAGCTCCGGCTCATAATTAATTTTTTGATGAATTATAGAGTACTTTGTTTATAATA  
GAAGACTTTTTTTTTCTCCTAAGGTAGCTTATGCGAGAAAGAGCGCCTACTTCGCTTCTAGCGCTACAA  
AACAATACTTTGAAGGGTAAAGCTGTTAACTTTTCTTCAAAGCTTAGAAAAGAAAAAATAATAAAAA  
AATTATACTTCTATTGGCAACATCTTGCCATACAATATAAATCGTAAGGGTTCATTAATAAATAAAAAATC  
AGAATTAGAGTGCATTTCAA

>Positive Sample 111

CTAAGATTCCCGGTGCTATGTACTTCTCTCACAATAATACAAGTAGTGAATGTCACCTTAATAAATTTTTG  
TAATAAAAAGTCTACAAAGTTTGTGTTGTGACTTGTGCGAAATTCATTTCTGTTGCTTTTCATTTTCTGTAG  
AGAAGAAATAATATCCGACAAAATGTAATAAATATGCTAAAGTGGGTACGACAAATTTCTTGAGAGC  
CATTGATTTTTGCTATAGAGGCATGAAAGCATACTGCACACACATCCAATACTTAACTTTGGCAAATGAG  
GAGCCTAATTACAGAGATAA

>Positive Sample 112

ATTGCCTGAATTCTTCACTATTTTATGATTTTTCCCTCCTTCTTGAAATTTGATTTATATTTAGTCCAA  
ATATTACAGAAAAAAGATGCCTAAGCCTTGGGTCTTATTTTCGAACAAATCCATCCATCGGTA  
ACAATTCAAAAAAGAATATTTGCTCTCGAACAATTTGCTAAGTATTGTGGGTAAATGATATATAAATTT  
TTATAAAAATCTTTGGCCAAGAAAAAAGACTATGTCTAAACGTAACGTTATCATTATTATTAATA  
TCATTTAATGTTTTATAAG

>Positive Sample 113

CGCTACATTGGTCTACCTTTTTGTTCTTTTACTTAAACATTAGTTAGTTTCGTTTTCTTTTTCTCATTTTT  
TTATGTTTCCCCCAAAGTTCTGATTTTATAATATTTTATTTACACAATTCATTTAACAGAGGGGGA  
ATAGATTCTTTAGCTTAGAAAATTAGTGATCAATATATATTTGCCTTTCTTTTCATCTTTTCAGTGATAT  
TAATGGTTTCGAGACACTGCAATGGCCCTAGTTGTCTAAGAGGATAGATGTTACTGTCAAAGATGATATT  
TTGAATTTCAATTGACGTAA

>Positive Sample 114

TCTGCAAATACAAAAGGAACTTTTGAGTTTTACGTATTCTTATGTATTAGAGTAGAGAATATTTAAAA  
TAATAAACTAAGATAGTGTGTATCAGTTGTTATTTTATATGTGGTTTATGTTTCATTTTTTTTACTTCTCT  
TTCGTTAATTCCATTTTCATTAATAAATATATATTTGCCTGAAAAACATTATGTGCATGGCCTTCTTTT  
CTAATTGAAAGGTTTACATACATCAATGGCATGATAGGATGTTGCAACTTTCAATCTAAACATGGTTGCC  
ATATAAAATATTACTCTAAA

>Positive Sample 115

GATCCAGATTTGCATCTCTATCGCTATTGTCGTCATCGACACTGCTCACTTAGTGCTGCAGGTAAATTCC  
GTTTTTTTCAAATTAATATTTATGAACGTTATGATGTCAAGTTTTTTCAAGAAGTAATTATCCGCGAAA  
AAAAGAATATAAAAAATACAAATGTGCATAGATCCTCACATAGTATACAACTAAAAAGCAAACAAAAGAA  
CATCCTCAAATGACTGTTATAAAGACAGAACCAACAACAGAAGTGACATTATTTCTCCACCATCAAAG  
AATCTTTAAGTAAAGATGAC

>Positive Sample 116

CCATCGAATAGAAATGCAACCATCTACCGCTACCGCCGCTCCAAAAGAAAAGACCAGCAGTGAAAAGAAG  
GACAACTATATTATCAAAGGTGTTCTTCTGGGACCCAGCATGTGTTATTGCTTAGTTTCTGCGTACAAAA  
CGTTGTTCTCCCTCCTTTATCTTCTTTTCCGCTACACCAATATATCATGTTTGTTCGTAATATTTCTTT

TTAGACCTAATAATAAATATCCTAAGTAACTATATTATATAAAATATTTTGATACCCTGTACCTGCTTTT  
GTTATCGTTGTACATCCATG

>Positive Sample 117

TAATTGTGCGATTTCCCTTGAAGTACATCTATCATATAAAATCATTCTTTTATATTTTGGAAATGTTTT  
GTGCTAAAAAATCATTATTCTGGGCGACATACAGTAAAATAATATTTAATATGAAACAAAGCGTATCAT  
TTTGTAGACACCGATATCACGTTTGAACAGGTGAATAAAATGCTCTGAATCAAACGACCCAGCGTACG  
TAATAAAGAATCCTGATCATTGCATACTTTCATAAACCAGCCTTGAATTTACAATCTTGTAATAGCCT  
TCCCAAGTTTTTGATATTGA

>Positive Sample 118

GATCCTCTTTGGTGCGGCGCTAACAATAGAAAAAATACACACACATTAGATTGGAATTAGAGCTTAAGT  
GGTACAACTAGGGCTAATAAAGAGGTAACGGTTCGGTCTCTACTAAGGTTTCGTATTGTGTGGCACCGAT  
GTTAAGCACTTTTAAGCGGAATAACTCGAGTGGAATTTTATGTTTAGTTAGGTTTTACCTTGAATTTTT  
TTAAAAAAGAGTCAGACAGGCTCGCTCTTCTACTAAATATTAGGAGCAAAGCAGTAAAAAGTCT  
CTGAATAAGGATAGTAACCT

>Positive Sample 119

TTGTATATATCATATCCCATTTTTTAAGAGAGTAACTTCTTGTGCGCCTCATTGTTTATAATTTGTAGCC  
AAGTTGTAGTGATAAATAAATTTAGGCAGATATTCTTATATGCTTGAGTGGAACCTTAGCATATTCA  
GTATACTTGATATTAAGCCTTTAACAACAATTAATGTTTCGGAAAATTAACCTGTTACATAATTTATGTT  
TAGCTCTTACTTTAATCCCAAAGAGGGCAAATAGCTTTTAAATCTTCAACTACTATAACTATAACTACTT  
TTCTTTCATATATAGTTAGA

>Positive Sample 120

TGCGTAACTCTATCCACTGCTTTATACACATCACCAAAGTTACCTCTGCCAATACATGATTGGATGGAAT  
ATAGCTTCGATGGAGGGTCTTGGACCTAATTGATATTTCTTTGCTTCCATTTTGTGCTATTTCTTTT  
GTTGTTTAGTAAATGAATTAGCTAGTAAAAAACTAAATTTAAAAAGCAAATGCTGGTTTGTCTTTCTTTT  
GAGAAATGTTTGCTAAGACAACCTGACTAGCCAGGTGTTCACTAAATCGATAATATTGAAAATGGCAAAT  
AAGAAAAAAGAGAGAA

>Positive Sample 121

AAAGCATTGGTGCATGTTTAATGTTCTATTTTTAATACACGTAGTAACTTCGTGTTTTCTTCTCTCTG  
ACCTAAATTATTACAGCCATATATAACTTTTTTTTTAAATTCGGATAACTGGCACAGTACCAAAGCTAA  
AATTTCTCACAAAACATAATTATATGACAACTGAACTACTCATTGCTACAGGTAATTTCAATAAAATG  
CGCTCAATGAAGTTGTGAATTTGCTTGCTTGTCTTTCTCGACCTTCTTTCAGTATTATACTCCATTTGAA  
TCTGATCACAAACACGAAAG

>Positive Sample 122

TAACTGTTACCAAGCGCACATATTTGCATTTGCCTTAGCACAGTGACAAAATAAAACACGTAATCTGAAG  
TGAGTCCGTCAAGCGTCTTTAGTCGAGGCTCCGATGAACCGTCTTGTGTAATCAGTGTACAGTTGGAT  
GCGTCTTGTGTATCATCGACGTATACGTTGCGCTGAGGACCGGCAAAGCGAGTAGCTGAAGCTCTGGA  
TAACGGTAAGGGTATCCTACGGCAAATGGATCATCCACATAAGTGGCACCGTAAGCTCGTCAATTGCAA  
CAGCGACTTTATTTTTAAGA

>Positive Sample 123

AACACTTTGACTTGAAGTATGAATACTACCATGGCGTCATTAACCTAAAAGTTCCTTAATATCGTCATAC  
CTCTATACTCTATTCAATATATTGTAATATAAATGCACTCTATAGTCATACAAATACTTTTACTTCAACC  
TATCTTCGCATACCATTGTCATAGAATCTCACACTGACGCATGATTAACGAATAATTTTACTATAAGG  
CCTCCCATCCGTGCTCTATCCTTTTGTGTTGCAATATTTATATACAGAATCTCAAACAAGCGGGAGAAGT  
GGTAATTACCCAGAGGTCAT

>Positive Sample 124

TTTTACAAGATATTCCTTAATAGAACAATCTAAATATTCTATTTGAAAAAATGAACAATAATTAACAC  
GAGAATTTAAACCATACTCGGCCGATTAGCGATCATTTCGTTAGTAATTAATAATTAACATTTCCATGTG  
GGACTCTAACTGCTGCATCGCCAAGTTGATAAGCCATGAAATCACCAATATCAAAGATAGCAATCCAAC  
GGAAAAATTTCTCGGCATATGGGTGATGATAAAAGCGTAGCTTAACAAACACCAGTGCTGGTTATTA  
TCTGTAAAATTTGATTAGAT

>Positive Sample 125

TTGGTAATCGCCTAGTCACAGTCATTTAGAAGAACTTAGCATCATTATTCCAGCATCATGCACCAGAAC  
AGGAAAATGCCATTTCTAAAAGTATTCTCATAGCCATTAACGATTCAATACTTTTTTGGTAGCTAAGTC  
AATGCCTCTCTGAATATTGTATACTATATGAATAAAGTGATCCCATAATCAGACTACCCAGCACTTAGTA  
GCGCATTTTAGAACTAAATATATATTGCCTTTTTAATACTGTAACCTTGAGAATTCTTAATAAGGAACAAC  
AATGGTCCAGAAGGTGTTCCG

>Positive Sample 126

AAATCATATCGGTCCAAATTTGCTCAAATTTGTACATGAGATATAACTTTTTCTTCTAATGCTTTCATTTTC  
AGAGTTTGTTTTTTTTTTTTTTTTTTTTTTTTTTTTTTTTTTTTTTTTTTTTTTTTTTTTTTTTTTTTTTTTT  
TAGATGTTAGTGACTAAAATCTGATGGACAGTATCAAAATGTAAATATTGTACCTAAAAAGAAAAAAGTA  
TTAAAGTGGTTTGCCATAAATTTTAAACAAGTGAAAAGTTTCAATATTTATATTTACATGATTGTGGACA  
AGCGGCATTGTCTACAGGCT

>Positive Sample 127

TGGGTGTATTGTTAAGTTTATGAAAGTGCTGTATTATTTGTA AACAGCTTCTAAGTATACGAAAATTAT  
AATAGCTTCAAGTTTATATTTTGTGCTAGCGTTACGGTTATGTTTTTACGATACATATCGCCTAAGCAG  
GTCTCTGCGCCTAAAAAAGTAAACATATAAATTGGGAAAGCAATATAATTAACATACTGCTATAGTAA  
ATTCATTAAGGCAATTTAACCCTGCCTTATTATGATATGAAATACCAGTCAACAAGTCCCGCTTAAA  
TGCCTCTAGTAAAGCTACA

>Positive Sample 128

CGTAGGGGAAGAAATGTAGATTTGAGGTTTCAATTTGGCTCGTGAGAACGACTTGAACCTTATTCATACTTT  
ATATAATATTTTAGGAGTATTGTAGCATTATGTATATTTTTCTTGCGGGTGTGCACTGCCGAAATAGCTG  
CTGAATATCCAGATTA AAAA ACTAAACAAAAA ACTGTTTCTTGTTTCGAATAGTAAAAGAAGTTTTCCCA  
AATGCTATTGTTATTTAGAAACGCTGGAAATACAGTATTTTTTGAAGAACTATCCGTTTTACCCGAACCT  
ATTTAATTCAATTCTTAAG

>Positive Sample 129

CTCCTTATCGACTGCTTTTTATTTCTATAAATGAGCTTGTATACACATGTATAGTTTGTATTTGGATTAT  
TTACTTTTTACGGATTATGTTTCGATTGTTTGTATTTTCATTCCCTAATTTTTCTTTACAGATATAATTT  
CATGATTAATTTCAAGGCAAATATAAATTTTATTCAGAAATAGCTTCATCACACAGTGTCTAGCGAAAA  
TATTTGTTAAAATGCTTAACCCAAAGTGTCTTCTCGACAGTGAACCTTTCCTAAAAACTTACAATTGTT  
ATTACAAAGTTCTTCGGGGG

>Positive Sample 130

CGCATTTCCGCTTGGAACCTGTTGCAGCTGTTGGCGCGCGTGGTTTTGCTGACGTGCCAGTACCTGGGCCA  
CGTCCTTTTGGAACCCGTCCATCCGCGCTCAAGGTCCGAAAATGCGTCTATGCTGGCCATTCTTGATG  
TGTGTATGTGTTGTATACGTATGAGCGGTTTTAATTGAATCGGCTTAGCCTGTTTTGTTTTGTTTTG  
TTTTGTTTTGGTTTGGTTTGATTATTTTGGTTTGGCTTAAATCTTCGAGGAAATTTGCGCTTCCGCGT  
AAAAAGGGAAAAAAGCAGA

>Positive Sample 131

CGTCAACTAAGGAAAAATATGCTCATACTTACATATCTCGTACACCCTAAAATCCCACACAGGGATTAA  
AATTAATAATGTTTAGGTAATGAAAAAATAGTAAAAAATGCTTCCCTAAGTTAATTATGAATTTCCC  
TATTAACACACATGCGTACACAAAAAAGTATACGGAACTATATTAGACTACACTACATCAACCTTATT  
TTCTTTTAAAACCTGGTGGGGGCTGAAACTTCTTGTGTTGAGGGGGCGCTTCATTATTAACCTCGACCT  
ATTTGCGCCGATATTATCGT

>Positive Sample 132

TGAGCTCAAGTACTTTGGTTCGTTAACGAAAGTTCATTTAAATGTTTCGCTATTTTAGTCTTTGTAATGTA  
ACATAAATGGCTCTAGTATGCAAATCATTA AAAA ATAGCATGTATGTTAATTAATTTATCACGGCTCATT  
CATTTGAGTTGATAACGCAATTTCTGATAAGCATATCACGTGACTGTGGTTCTAAGAGTTACTCCGATCGC  
CAGTAAATACTTTATGAGACGTTGCATTATTTCTGTTTAGTTGATAAATTTGATTTCTAGTCTGTTGAA  
AGCCTAATGCATGCAGATGA

>Positive Sample 133

GGTGACATTGGGTTTCGAGTTAGGCGGAAGTTGGGCGTTCATCATCTATAACATTGTAAGACCTTTAGAAC  
TCAAATATTTCCGTCGATGACTAAATGTTAATTGATTAATTTTTTGCTAATCATTGAAATGATTGGTTT  
TAATGGATAAATCTCGACATTCGAATAGATAGCATATAATTCAAAAACGATTATAATGGGATATATATAT



AAGTTTAATAATATTA ACTCCCTTCCCATTCTTGAAGAGAAGAGATGTGTAACTCCTCCAAATCCGAA  
GCTGTTGCATAATGCGTACT

>Positive Sample 134

ATTTTAACTGTGTTGCCTTCCCTTGCTCGCAACTATGCTACGCTATATTGTACTCTTGAATTTTATTTAT  
GTTTTGTTCCAGCGGGCATCTTTCAATAAAATGAACTCAAGAAGAAGTAAATAATAACAAGCTATAATG  
GGTGGCCATTTGTGATCAAATTTGGAGTGAAACACGTATGATTATGTTTGA ACTCTCTTTCTTTGATACG  
AAACCTCAAGCGACGTAGGTGATGGATATATTCACAAGATAACAAAGGCCGTGTTACAACATTAGATATG  
TAAACAACGTGCTAGAAGTT

>Positive Sample 135

TAGCATGTGCTATTGATAACCCAGAAGCTTGTGAAATGTGTTCCGGTTAATGAGGGCTAAGTTTTTATTT  
CTTCAATTCTATTTATCAAAATTTGGGTGTTTACTTCGAGGTGTAATTTATATTTCTTTTGTCTCTCT  
GATAAAAAAATTGGTTTCCATTCTAATGCCAAGCTAAAAGGTACCTATATATGTTTACTAATTATTTTCT  
TACTTTGCATATATACATAAAAAAAGTCGAATAATTTAACATGAACATTTTAAAGCTGTCCTTGTAAGAAG  
GCCATGATACAGATTCCCCC

>Positive Sample 136

CGGCCTTCTTAGTTCTATCATATACGACGTTATACTTATTTACTTTCCCAGCGTTGAAATTAATGTGTC  
TTTTTCATAATATTTACTTTTTGGTGCGGAAATCTGTAATATTTAAAACAAAATCTCATCCTTTTGAAA  
AGAAACGATGAAGAAAAAAAATAATAACATACATTGTACCTTACTAACACTTGTAACAAACGCTTAC  
ATTATAATGGCACAAATGAGCAATCAGTGTCACTTCTTCTACATAAGCATAATTCAAGTATCGGGATAT  
AAAGCTATTATATACCGCTT

>Positive Sample 137

AAGGTTCAAGAATTGGAGAAACCGTGAGCGACTTCTTTGATACTTGGATGTAAGCTTTTATTTAGTTGCT  
TTTTCGTTTTCTTTATTTACGCCCTTGTGTTGCGTGTATACTTTACTTTTCTAATTCACTTGAGAGCGG  
GACTATATATAAAAAAATGCACAATTACAACTTGAGAATGAATGCATATCGTGAAGATTTTGATATTA  
ATTAAGAAGCCAAAAAACGTAGGCAACCATAACAAATTTCCGGCATTGAACTTGATTCTAAATGCTACAT  
ACAATTACGCGCGCTGTTTT

>Positive Sample 138

ACTCTTGCCAAGCGATACAAGCTTTACAATCCTGTAACAAAAACATACTTTTAGCGGTTCCGACGGTATT  
CTTCTTTTTCTCCATATATTTTGCTTATGTTGGCTACTTTAAAATAATTACCGCTTCCCCCACCAGAAAC  
TAAACATGAGCTAAAGGCGCAAACTTAAAAAATTACATAGCCAAGACTGTTTTCAAGAAAAAATATCA  
GACCACATTTGATAAAGTACATACCTCTGTAACTCCCGTAATACACCCATATTCTTGACTTTCTACAA  
TCTATCACTCAAACCTTCTCT

>Positive Sample 139

GCTTCGGCGGTTTAAATTTGGCGGTGCCATCAGGATTTACTCGCACATTGTGGCCGTTCCCTCGGGGATGG  
AGTGTGTCCTGAACCATATTTTTTAACATTTTTTTGAACTAATTAACCGTCCCAATGAGGGATGTTGGAA  
GAGTAAGTTGATTTAATGTCCTATTCTTGTTCTTTTCGAATATAAATGACGATTGGAAGGTGCATGTCAA  
TGTTTATCATCATGTTCTTGTTGTAGGTAGTCCTTACCTTGTTGTAGAGTGAGTAGCGACAGGCGGCAG  
CGGAATATAAGAAGGATAAA

>Positive Sample 140

GTTTTGTTATAAGGTTGTTTCATATGTGTTTTATGAACGTTTAGGATGACGTATTGTCATACTGACGTAT  
CTCATTTTGAGATAACAACAGTGGGCTAAGAATATAACAACCGTTTTAGTCAATGTGTTGAAATATCATA  
TTTTAATGCATTGCTCGAATCTCTTCCCTCGACTTACTTATATTGATTAAGGGTATGATTTTGATCCTTC  
CACCTGGAAAACTGAGGACCTTACAGTGTTATTAAGTGTATGATGTATCACTGTCGTTGTAGTATTTCT  
CGGGAAGTTTTTCACTGGCA

>Positive Sample 141

AAAAGGAATGAAAAAAGTTCAAAAATAGTAACAGATATCTTTGAAAAAGTTAAAAACTG  
GTAAAAAATTTGAATAGAGTATATAAAAACTAATAAATATGTTTAGTTATCATAACCATAGAATAACT  
ACTAGAGATATTATTTCAATTTTCGTTTTCAATTTTTTATTTTTTCTTTTCAATAAGGTAACAGAAAGT  
TATTTATGCATTCTTGTTCTACATGTCTTATGTATACTAATAAGCTACTACAGGTATTTTGGTAGTATGG  
CTTTTAAATGAGTTATTAAT

>Positive Sample 142

TTTTCTTTTACTTTGTGTTACTAATATTATTAATATCTTGTTATGATTCTTTGTTTTAGCAGCTCCAAAA  
GAAAGGAATATTATAATATAATTGTTGTAATTCGGAAAAAAAATATTAATTACTATGGTGCATATGCGT  
ATATAAAATTGAGCATTACCTAACGCCATATATTACTATCTAAAGTCCTCACAGATGATGTGTTTTCAA  
ATCAAATGATTGGAGCTCCTCATCATCCCCGGTAAACTGCTCGGTTTCAGATCCATTATCCAGATAC  
CTCAACGGGCTAGTGACGC

>Positive Sample 143

TTACATTATGGGAGTGAAAGTATAATGGAGCACCCGTGTGAGTATGTGCTTGTGACGTAAACGAGGATG  
AACAAACGACAAATAGATTTCGACGTATTGAAGTACTTCTTGCCACTTTTCATCTTCTGACGCGGTGAGC  
TTTTAAGAGCCCTTCTTTTTCGACTGGCCACGTGAGAAGACATACAGTTCAGCTTACATAGCTTTGGCCC  
ATACAATACCTATGTGCCCCAAACCGCAGAGACGATTAGCACACCTTTTTACCTGCACCACAGTCATTC  
TCGATAATGGTGAAAACACA

>Positive Sample 144

ATATACACTTATGCCAATATTACAAAAAATCACCACTAAAATCACCTAAACATAAAAAATTTCTATCCT  
TCAACAATAATACATAAACACACTCAATTGCGTATCAATACCACCATGAGGTCATTAACTTAAATGTTCC  
TTAATACCGTCATACCACTATGCTCTATTCCATATATTGTAATATAACTGTACTCTATAGTCATACAGAC  
GCTTTTACTTCACCCTATCTTCTCATACTATTGTCATAGAATCGCACACTGACGCATGATTAACGAAT  
AATTTTTACTATAAGGCCTC

>Positive Sample 145

GTGACTTGATGGGTGGTATTTCCATCCAATCAATTAATGAAGCAGGAGGCCAAAAACGGTGCAAGACTTTC  
TGAAATCGGATGGTAGAACTAGCGATGCTCACACAACGCTAATTTGTTTCCTTCGAAGGGGCAGTCGGCT  
ATTGTAGTTTCTATATATTATGTAGCACAAACATGGAAACCATATTCAGCCAGTTTGTATATATGAGAATT  
AAACGTAAAACCTTTTTCATCCTATCAGTCTTTCACATTGGCCTTGCCTAAAGGGCACAAATCGTTCACGT  
ATATACATATGTATGTTTAC

>Positive Sample 146

CATTATTGTGAATATAAGCTATTTGAGAATTATTTTACCTTTTTACAGCCGCCCCCCCAGGATAAATATT  
TCAAGTTGTGGTAACGGAAAAGGGCCTTACATACTCTAGTGAGCATAACACGTACAATGAACTATGATT  
AAGTCTTCTGCGCTTTTTAGAGCCGATGTAAAAAAACATGCTTTTTTATAACCAATGCATGAAGTATAAT  
TTAGGCCCTTTTGTAGTTAACTACTCAGTGTGCAACACAAGTTTGTAGATTTTCGCAGTCAATTTTTGGGT  
TGACTCGATTATTTGCTTTG

>Positive Sample 147

CTTTTAACTCTTGCGGAATCTCTGTGCTCGGAGAAAAATATCCTGGAAAAGAAGATGCGGGGTAGGCCG  
ACTTAAAAGATAAGTGCACATTTTTCCGGACTTCGAGTGGCGACAGACAGCCTGTTAACTATTTTTGAGA  
ATAATTAATCTTTAGGGGGGTTTTAGTAAAACAAAACAAAAGACTCAAATAACGCCAAGAACATCCGAAG  
AAGTCTGGTTCGCGCTTTTTGCTGAGGTGGCTTTAAAAAACTAGTTTGTGAGAGATGTAATAATGGCTT  
TAACAGATAATTCCTCGTTT

>Positive Sample 148

CGTAAATTGTTCCGACAAAAGAGTTCTTGCTATGATTATTCAAATGCTGACTTTTTATTTAGCGCTTA  
TTGGAGTCTTTGCTGTCTGTAGAAATCTGACCAGGCATACAAATTATAGTTATTTACTAACGCAAGAAGT  
TTATTGTGGTTTTTCATGTGTATGTGGCCACGTAGATTTATTTTGTAAATAAGTATCGCGACAGCTTCTAT  
TTTCTTGGTTAATACGCCTGTACTAATTTCCATTTTTGAGTTTAGGCGGTGCTTTCGTA AAAATGATAT  
GATTATCCGCTCATAAATG

>Positive Sample 149

TCGCGACAGCTTCTATTTTTCTTGGTTAATACGCCTGTACTAATTTCCATTTTTGAGTTTAGGCGGTGCT  
TTCGTAAAAATGATATGATTATTCGCTCATAAATGGTAGTCATGGTAAGGAAGATAAAAAAAGCGCAGT  
TCCACTGTCAGGCTTCGTTTATTTAACAATATAGATACATCATAAAAGTTTTTGGTAATGTTCTCTGGTT  
TACTTCGTA CTCTGATCAGAAGTCTGTTATATCATGGTTCGGTACCAATTTTTTTTTATACACCATTGT  
GATGATGTTAAAACATAACG

>Positive Sample 150

TATCTAGATGGCTTTTTATTCTATTAAAATGATCTATCATAGACACATTCATAGGTTAAATAGGACGTTCT  
CCAAAATATGTAACAATACTATATAGAATAATATATGTGTTTTATTCTGCTTTTAAATTTCCAGATTTT  
AAAGTTTTGATACAAAATATGAAATTAGGGACTTCAAAAATTCTAATTTAGCCTCGAAATTGAGAAATGA

AATTAGATCATAAATTAACCTCTAACAAAGGAGAATATATATACGTACATATATATATATATATATAAG  
TTATTGTAATTGAGAAAAAA

>Positive Sample 151

TTATTTTATGTTGATATCCAGCTTCCGTTTCGTCAACTATTCTCTCGAGCTCAGTTTTGGGTTTTGGCATG  
TAAACAATGCCTTCGCTTGTATTACGCAAAAAAAAAAAAAAAAAATAAATAAAAAAAAAAAAAAAAAAATAAGG  
TATAAATCGTTGGTCTTTTATGCACAATTATTTAACTATAGTTATCTATTTACGTAAAGGCTTCTATTT  
TTCCTTATCTACAAGAAATTGCATGAAGTTAATTTTTTTTTGTCCACCTTTGATCTTCTGAATGTGTTGG  
TAATGAAATTTTCTAGTCTC

>Positive Sample 152

TTACAAAAAGGGTGCCGTTTATTAATTAATGTTTCTTCCCTGAAAATATGGAAAGTACAAGTTTTTAGTT  
GAGAAGGGTTTAAGAAAGTTTTGAAAATGATCTAAAAAAAAATATAAAGCAATCAAAGAAATAAAAGCTGG  
AAAAATGCGTAATAACCGAAGTACTAAAATTTCTTTACGCGCCAAATAAGAAATCGATGCTCTTGAAAG  
TAGCAACCATTTTTAAATAATATATTCTGATGGTTCTTGGCCCAAGAGTTTTCTTGAACTTTTAACGT  
TAAGAAGTTGATTCTGCTGA

>Positive Sample 153

AAAGCTTGCCAAAAAGAAAAAGCGTGAGTACTACCTCTCTCTGTTAGTGGATTTGCAGGACAAACTTTTA  
GACAAATTAGATAATGAAAAAGATATGGGGTGGAAAGATAAGAATGTTCATTTTACGTTTTGTTACACAAA  
TCCAATCGAACCTCGAAAGCAAACCCGATAAAGAGCAGTATTTCAATAATCTCCCAAATCTCCACAAA  
ACATCCCGAAATCATACATTTGGTTGTAAAGTCATTGTTGTCGACGTGCAACAAGATAATATCTCTCTCT  
GACTATGAATATGACATCAC

>Positive Sample 154

CATTAAGTGCCTCTTTCAATGACTTCACGCTTTGTAAAGTTTCTTTAGCAACAAAACGTAATTAATTCT  
TTGGTCAGGTTTTATTGCAGAATGATTAATGCATAATAACCTTGAAAATAACTTATCTAGATCAGGCAAT  
GATTTCAATTTCTAGCCTTAATTTTTGTAGAAGGTCATCATTGGCTTTCAATTCTTCTAGGGCCTCTAGTC  
TCATTTGATACTGCCCTATCAGTTAATGGCTGCAGTATACTGTTCCGAAGTGATCTTTGTCCCATTTT  
AGTGGACGTGGTATCCAAGA

>Positive Sample 155

ATGAAAAATCTAATAATGTTATTTGCCGAATTTTATTATTGATTTGGTTGGTCTTCTTGATAATTCTGTG  
GGCGCTTTTTTTGTGACATATTAATTTGCGAAATTGCAAACGAAAATATAAATATATATGAATGTTAAT  
AAATAAATTATTTAATTGATGATTGAGGATGAAATACACTTTTATGATCTGTCCTTACGCGTAATAATTA  
CAAGAAGGTGAGAAAATTGCCTTTTTTTTGCTAATTTTTTTTTTTTTGGTACCATATTCAATAATTGATGCT  
AAATTATAAATTGATTTTAT

>Positive Sample 156

ATATTATTTTCGAGCTTTGTCTTGTATATTTAGTTACGTTGGGATCAAGTTTTAAAAAACTAGATCTGG  
AGTGACCAAAAAAAAAAATACCCAGCGTAAGGTAAATATTATGGATATGCTTTGGAAGAAAAGAATTTTGA  
GACTTACACATTATTCGGCACAGTAGGTACTAGAAAGCATAGAATCACATTCGCCTTTAAAGACATTCTT  
TTTTCTTGCTCCTTCTATGGACTGCGACACAATAGTTGTTTTTGTGTCGTACCGAAGAAAAGCCTTGTG  
CAGAAAGCAAAAATAGTACA

>Positive Sample 157

CGACTTGGATGCCGCAATTGAAGAATTAAGGAAGCATCAAGATACATTTTAGAAGTCTACTAAATTAAT  
ATAGTAATAAAAACTAAATATCTATTTATTGAACCTGTCTTGAACATTTCTATTTTTTTTTACTTTTTAG  
TTTTCTTCTATGCGCAAGCTTTTCTATTGGCTGCCAAATAGAAAATTATTGAAATATGATTACATTACAA  
TATTTATTTGTCTTATGAAAATAACCATCACATTATACTAACTACGGAGGTACCATCTTGAATCTCGT  
CCTGAAGACCCTATTAGCAT

>Positive Sample 158

ATATTTGTATATATAATATGTGCACAAAATTACTACAAAATAAACAACCTTTTTCTCTCCCGGAGAACAAA  
GTAAGTGGAAAAAATTATACTAATAACAATCTAAAAATGTTTATTAGCTAGGATTATACACATAAATATA  
TATATATGTGTGTCTATATTTACATATACTAGACCGCAAAAAAAAAACATAAGGGCATCACTCATAAGAA  
TAATAATATTAAGGGAGGGAAAAACACATTTATATTTTATTACATTTTTTTTATTAAAGCGCCAATGATAC  
CAAGAGACTTACCTTCGGCA

>Positive Sample 159

TTGTCTGGAGGATCAATCGTCCTCTCAGTGCCTTTCTTGGCGAGACAATTCAATTCGCTTTATGCTCTT  
TTTTTTTGTGAATTTAGCCAATTCGGAAAAAACATAAAAAAATGGTTATGCATTCTTTATTTTGAAGAA  
TGAAGTAGATATACAGTAATATACTAAATTGTCAGCTCTCGGCATAATTCAATGGCCGAAAGTAGTACT  
ATTAAAAAGAAGTGCCTCAAAGAATAACTCCGGGAATAGGTGATGTAGCTTTTGGTGCTGGAAGCGAAC  
CGCTTTCATGTGTTTTGGTC

>Positive Sample 160

GCATACATATGAATATTACAACCACTCAAAGAGAAATTTACTGGAAGATTTCGACAAATAAAAAATTCAGCT  
TTTTCAAGTGCAAGCGTAACAAAGCCATAATGCCTCCTATATTTAGCCTTTTTTGATATAACTGTGGAG  
AGTTAAACAAGCGGCTGGACTACTTTCTGGAATAGCGTTCGGAATGTGTTTTACTTAAGGATTGCAACGTG  
ATCCTAACGAGTGGATGCACAGTTCAGAGTTATCTAACAATATTCGTGAAGGATATGTCAAATTTGGATA  
CGCTTATGTTTTATGATATAT

>Positive Sample 161

AGTGCTAATGCTATCAATGTTTATTATATACAACGTACAATAGTATTATTCTCTAAGATCGTTGAGTTGC  
TCATAGAGAAATCCAAAATATTGTGCACAATAAATTATATTATCTTTTTGAGACGATGAAATCTTAAAAA  
TTGTCAGCAAATAAATGTTTATTTATCGAATACTAGGTGCAAAACATTTTTTTTTGTTTATTCAAATGATC  
ATGTACCTTCTTCTCGCGAAAGTTTTAATTAATAAATTTACTGATAGTTTTTTAATGATGAACTTCTATAAC  
TAAACCATAATAATGAAAAAT

>Positive Sample 162

AGCTATAAGTTATTGAAAGTAAGCTAGACAATAATTTTTGGTGAATAGTTGGTGAACATTCCTGAACTAC  
AAAGGACTATTGTTATATTTAGTTTACTTCAATTGGCCCCCAATAGGCTTCGTAATTTTTACATGTCACA  
AAATTAATAAGGCAAAACGAGAAACAAAATATTAATAAATGTAGGAAAAAAAAAAGTCAAATTTGGTTTGA  
CGACTTAACCTAATCAATTTAAGTCGGAATGATGATCAACAATAACATCTTTAATTTTATCATGAATATC  
TAATTCGGTTAATTGACCCA

>Positive Sample 163

CAACCACTAAACAATCTCGTTCAAAGCTCTAATTACTTGTATATTATTTTATACGTTTATGTCTATTTTC  
AATGCAATTACGTGAAAAATAAAAAGACGCTACCATAAAAAATGTTAAAAACTGGTTAAAAATGTCAAAAA  
ATGGTCCGAAAACGTAAAAAATATTCGTGATACAGTTTGCATAAAAAAAAACACTATTGTGCGCGATTAATA  
TAACCTACTAGACTTAAATGACGACACTTTAATATGAAGTTCAGTAGTGTGAATTAATAAAAACAGTCAG  
TTCTTGATGGATTGTACCCT

>Positive Sample 164

GGTACCTATGCAGCTGTCTCTCCTGAGAACTGACTGAAGGTCTGAAGAGATTAGGTGATACTTTATACG  
AAGAATTTGGTATTTCCAAATAGAGAGGTAATAACGTTGGAAGAATATATATAAGGTGAAAAAAGGACGT  
ACGTATTTTTGTATTGCTTAAATTTGGAAGTATTTTTCTTTTTGTAAAAGACTGCAAGTGGAAAGCCAAA  
ATATAATATTTGTTTTTTTCATTAAGAGTACAACCTTTATACAACAATTATAACTTGATTTGAGAGCCAAG  
TTATGTAAGATATTTTTCTC

>Positive Sample 165

GGAGGCTTTAACAAGTCATTAATATCTTTATTATTTTTACTTGTGAGTTCATTAATAATTCAATTTATAA  
TTTGTGTTACAAACAGTATTTTACAAGTCATAATAAACGTTCAAACAACAACAATATTAAGAATT  
GGTATTAGGATCCGACATGACAATTAACCTTAGATCCTTCTATCAAGTTTCTAATCATATATTACATCTAT  
TAAAATAATTTACATATATCATGCTAAAGCTTATAAAGAGACATTCTTCTCTCGTGCCTGGGCGTCGC  
TAGCCTCAAATACAAGTGAT

>Positive Sample 166

AGTAGACCTAATATTTGTGCAAGGTATAAATGAGGAAGGAGAAGGATTAGCTGTTATGAACAGATTGCGA  
AAGGCGGCTGCAAATAATTGTATACAGTTTTAAATAAAAACGTGATTAACTTTTGAAAATCATAACCACT  
GATTACGGAGATTTTATATCTAGTCCGGAAAAAGAAGGAAAGAATAAAAATTTATATTGCTTTGTATATA  
CGAAAAGTCGCCCATACATGTTTATCTTAGTATCCGTTGTAATATATGTACATATATACATCTACATAT  
GTTCCCATTAATTAGTACAT

>Positive Sample 167

TACGATCCGGAAGAGATTTTTGATGTTTACATATGAGCCGTTTGATAGAAATTTTGAATTTTTTATATT  
TATTAAGAATAAAAAGTAAAGTGCAGAAAGAAAACAACATCATAAATATGAAAGAAAAAAAAAAGGCAA  
TGTTAGTGTATGAAGGGAGAAACAATTACCGTATACTGTTTGCAGGTGTCTATCCTCCACGGTATAGCA

CGTTAGGACCATTTATTCGCGCTACGGATATAGAGTTTAAAATGACTTAATTACATGAATAATACCATAA  
TTCTTATAACCGTCATCAAT

>Positive Sample 168

TACCAAGCGCTGAGTTGGTCAATTCAATTAATGTTTTGAGAAGATTGATCAACAAATTGGATTCAATGGA  
TATCCCACTAGCTATTTTCAATTAAGGTTAAGAACGAATTGTTAAATGTTATTGTTAACTATTTTACGGAG  
TCAATTCTAAAGTTGAACAAATTTAATCAAAACGGTTTTAAATCAGTTTTTACATGATTTTAAATCTTTAA  
GCAGCATTTTGAGCTTACCGTCACATGCTACCAATTATAAATGTATGAGTTTACACGAACTAGTAAAAAT  
ATTAAAGCTAAAGTATGATC

>Positive Sample 169

CCTACGGCATCTACCTGTGTTAATTTATTAATTTGCCAGATTATAGAAACAAAACAATTTTGGAGAGAGA  
AATTATTATATGCAATAAACTCAGGCGCCAGGTTTGACTTATCATAATTCCCAGAAGATTAGGGAGGTAA  
TTAATTAATAGGCAGATTTCTAGTTCTTATATATTACTATAGATAAGGAAATTATACGCTTGTATGCAGA  
GATAATTTAAGTTTTGCTTTGTTCCGCCACCATTTAGTTATGACCTTTATCTATCATTCTATTTTTTATT  
GGAAAGGCTTTACAAAAAAC

>Positive Sample 170

AAATACTTCCCCGCTATTTGTATATATGCATATCTTTATATTATGAAAGATATTTTTTTTATTTACTTTTA  
GTCCGTATACTTTTATTTTGTGTTTGTAGACAATCTCGAAGAACAAAAAAGATAAAAACAGAAAGAT  
AAATGTGCACTTTTTGTACCTCGTTCTGCTATAGTACTTCCAACCAGATCGACTGAAAGATTACTAGTA  
TATACGTCATGTTTTTAAATAGTAGTTCCCATTTCTGCTTCAGTGAATTAGATATTTTTTTCCAATCATT  
TCTTTAAACCCTCTGCGATA

>Positive Sample 171

ATGCTCCTTCTTCACTCATTTTCTTGTCTGTTGTTGAGACATTCAACTTTGATCCTGCTCTTGTACTTT  
TATGATTCATTACTTATATATTGGTCTTCATTATTCTCGAGATGAAATTCTCAGGGTCTTTTAAAAA  
AGTTTCAGTAGGAAAATAAACGTAATTAACCTATTTCTCGGTTTGAACCTGAAGTTGCGTGAAAAAAG  
GGTACTGCAGTCTTGAAAAATAGAAGCCAAAAAGAAGTTAATATCAAAACAAATAAATCTTGCACATAT  
TAAAGCGCACAAAAGTATTC

>Positive Sample 172

TGATGGTGAAAATGTGGACTCTTCTGATTTATTAGTTCTATTAGAAGACCAAGTTCCTGTTGAAACTAAG  
GCATGAACCGGTTAGTTCTCATTATAATGTATAATATACCCGAATCTTATTTATTTACCTTTCTTATTT  
TTTGACGACCAGTAAATACTAATAACATAATTAGGAACAAAAGTTAAATAAAAAAAAAAATAATAATTTAA  
CGCATCCAATTAACGTGTCCTTTTTTTCATCATTAATTTATCTACTATTTTCGATTTAAATTCCATATA  
TAAATCCTAGATACATTCCC

>Positive Sample 173

TAATTGACGCTGATTTCTAGTTAATTAATAATAAATATATGCAAGAATTAGCACCAGGCAGTCATTTCT  
GTAAATTGCTTTGTTTTCTATTTCAAATTTGTTTTTGTATATGTTTCAATGTTCTCGTGACAATGCAGG  
CTTTTTTTTTGTGCGAATTAAGTAAAGCTAATCAAACTAAACAATAATTTATCTTGTTCCTCGAAAGAGT  
GGATCATGAGGAGGAAAGCTAACCGTCCAAGATCCTATATAATTTTGAAGTAAACCAACTGTTTACC  
TAGAAGACAGGTATCTGGAT

>Positive Sample 174

TCAAGCATGAATAATACAAAATAAATATTTGAGCCAAAGGGGATGATTTAATTATCAAGTTTTTCTTTTC  
ATACTTCGGTTTACAAGCATTGTTTACGGCTCTTCTTTTCTTAGTTCTTGGCAGTTTGTGTTTTCTTGAT  
GAGAATAAGAAAAGTATCGATCTTACGGCAAAACATAAATAAAACACAACCTTTATCTTTTTTTGTGCGAG  
TAGTGTGGTCTACAGCTCCAAGCCTGCCGCTTTTAAATAGTGAGCTGTGCATACTGATATATGTTCTA  
TTTTACCCATTTGAGGGGCC

>Positive Sample 175

GTAATTTCTGTTGGATAGCAACATTTCCCGCTGGGATACTTCAACATGGGCTATGAATTTTCTTTTGTCT  
TTTATCTTTTATCTTTTATCTTTTATCTTTAAATTTTGGAGCTCGGTTAAGTTCATAACTATTGCGTGC  
CCGAATGGTATTCTTTCAATTCACAACCAAACATTAATAAATGAAGAAAGCATACTTATATTATATCAAT  
GTCTTTTTCTTTACTTATTTGTCTTTGCTCATAAATTTCTACATAATGGTAGTAATGGTGATGAAATGTT  
GTTACTTGTGATATATTACA

>Positive Sample 176

GCCGATATACTCTTCAGTTTGTTCATTCATGATTTATTATAATATAGACTTCATAAGTGAACCTTTGTAGTT  
TCTGGTGATTACTATAGCGATACTTTTCGAATAGTCACAACAAGAGCTTCTGCTTCACGTTTTTTGGAAA  
CAAAAGACTGAGGAGGGGCTAAATATAAATACTGATTCATATTACGAAAGGAAATAAAAAATAACTATA  
TGTAGATTTATATTAATATTGTATAATTGCAGTCCTTGTATTTGAAGAGAATGTGGATTTTGATGTAATT  
GTTGGGATTCCATTGTGATT

>Positive Sample 177

CATCTTCTAACACCGTATATGATAATATACTAGTAACTAGTTAGTAGATGATAGTTGATTTT  
TATTCCAACAGTATTTATGTTTTGTTCATTCCTTTCTACATAATCTTGAAACTAGGTAGATCTACAATTGA  
AAAGTAAATACTAACATTATTTACTAAATTTAAGTTAGAAATCGGCACGAAAAAATTTGACAGATTACG  
AGAGTCCAGCCAAAATATGAGTATATTACTATTTCCCCTTGGTGAAAGAAATGAAAGATGTTATTTTTTA  
CCGGCTTAGTAATACTGAGC

>Positive Sample 178

CAAATAGAAGAGGTAACCAATCAATGGCCCGTTAGTTTGCCATTTGCTGCATCCTTCCCATGCAAAGTG  
TCTTCGTATTTAGTGATGTTTTGTTAGCGACACAAAAGAGACCTCGATGACAGACATTTTTTTTTCTTTA  
CTTAATGTATTATAAGTGTGTCTGACCTCGACTATCATTATAATATTAATTTGAAGTTCTATTTTACATT  
TATATGAGTTATTCCATTACATAATAAGGATATCAAGAGCAGATTAGTGTCTTTTAGATTATACATCTTT  
TCCCCCTTTTTTTGTTGTT

>Positive Sample 179

TTCCTTCATTGAAATGCTCATCTATTGCCAAGTACATAGAATCCACAGTGCATAGGTTTATGAGATGCTT  
GGAAGATGTACGATCGCCTGCACTATATTAGTATATTTTTTCAGGCTTTACAAAACCAGAAAGAAATTAC  
CGACTGTAATACTTAATTTCCATGATTTAATCGTATGGTCCGTGAGGAAAGAGGAATTTAGGTAAAAA  
AAAACCTTTGTCTATCAAAACATAAAAAGAAAAGAAAAAATTAATGAATAAGTCAGCTTTTTAGCATG  
ACCACAGTAATAATAGTAAT

>Positive Sample 180

TTGTAGCATCCTAAAATTTACTTCTATTGAATATATACATGTATTTATTACTTGGACGTTCTACTTTAAA  
TGTAGTCAGTCGTTTTTTTTCTCGATATTGTTTTTTTTATTGTTTCTAATAACTTCATTTGTTACTTTTTT  
GCCTTTTGTATTATGGAATAATGCAGGTTAACATAAGTAAACATAAAATATGAGAAAACTAAGAAT  
GTTTGCTGATGTATTGAACAGTTCACATCGTTGTGTCTACTATTAACACTAAGTTGTTGATCAAAACATT  
CCCTAATTAATAGCTGCCCC

>Positive Sample 181

TATGGAGTAGTTGGGCTCTATAAAAATTTAGTTCCAAAGTTTGTATATTTTTGTTTCTATAATAAT  
GTATTGAAGATATAAACAACATAATTTTACTGTAAACATTTAGGCGCAACAAAAGGACGATCTTTTTTT  
ATTTATACAAGTTAAAGATTTTCGATACAAATAATATTGTGGTTAAGGTACGTCCAACCTACTTAAA  
TCACTGAATCCTTCAGATAACGAAATTACGAATAATATCTACTCTGTTTCTCCTTGTCTTTGTTCTTTCT  
TGCAGCCAGCCAAGCCATT

>Positive Sample 182

CGGTGTTTTTGATGTATGTTTACTGCTAAGAGTATACCGTCCTGTTTACTTTTTTACCTTTTGTCCGTT  
ATTGATTTTTTCGCAGCAAGGTTGAAGCTTCAAATTTGAAAATGAAATTAAGACGTAGAGATGAAAAACAG  
CGATGAAATTACTTTTTATAGCTTCTTTCCCATCTGACTCCGTTTTATAACAGGGTTCTTTAAGGGCT  
TACAAATAAATATAAACACTAACACATATATATTTCGACCTACAGTTTTTTCGACCAATGAAGTTTAC  
CTATTTGAGTTAGTGCTTA

>Positive Sample 183

GCAAGTGTATACTCTCATTAGCTCTGTTTCGCGATGTGTATTTTCGTGGTGCTTTATATAGGGTTTTTAACT  
TTTCCCCATGAACATTTCGCTGTTATGTATTCGCAACTAAAAATAATGTCTCTCTTTAATTTAATTTACA  
TCCAAAGTACGGAAATGGTAACTAACTATATACAAAAAAGTTTCGCTCAAAAAAAGTTTAACTATTGT  
CCAATTGTGCCATTTTGGTAAATCTGTTTTGAACTTGAATTTGCCATTAATCTCCTCATACTTCCAAGC  
ATGCAACCATAATTCTAGGT

>Positive Sample 184

AAGGGTCTAGGACATTTCTATCAGTTTCTATACCAAAGAAGAAAAAGTGGAGAATTGTTTGTATTTT  
AATATTTTGTCTTTAGTTTTAAAAATTCAGAAGAGAAAAAATTTATTTGTCACAAGGAAATAAAACA  
TAAACAAAAAAGAAAAATTAAGATTTGCAATTCGCCGCTTAAGCAAAAAGTAGATCATTCACTGGAATAT

ATATATATAAACGCATTTATAATCTTGTAACGTGCACTCAATTTAGCTACGAAAGCCAACCAGCAAGGAA  
CCTTTTATTTGAGTAGGTAC

>Positive Sample 185

TGGGATTGTCGGATATCAAGGTTGAGTAACGATCGTTGGCCTCGGTATCACCTCCCCCTTTCCTCTTCT  
CTTTACATATATCCTAACCACACAAGCACTCATTGATATGATAATACTTATTCGTTTTTATTCAAATAG  
ATAGCGCAGTCTTGAAGATTTACCTATATTTTTAACTTTTGTATAATAGTTGAAATAGATAATACAGCA  
TTTTTTGGCTCCTGCTTCATATCTTTTTTTTTAGGTTTTTGTCTTATATTCTTTCTTTAACTCAACTTG  
TGCGGAGCAGAGGTAAGAG

>Positive Sample 186

CATCGATGAACAAAGGTGTGATCGGTAATAATCCGCCAATAACGCACTGATTACGTAAACGATAATATGT  
TCCTGAACCTCGCATTTTTTTAATGATTTTTTATGACCTCTTATATATTCTTTCATTATATAACCTCTATA  
TTACATCAAAGATGGAAAAATATAAAAAAATTAATAAAAAAAGAAATTTTTTCCAAAAGAGTATA  
TTTATATGTATGTATACATGTAGGGAAAATAAGAACTTTATTAATAGTAAAAAAGCATATATACTTTAT  
TATTAACTCTTTTGTTTTTT

>Positive Sample 187

CAGCAGTAGTTGCAAAGTGCCTTTTTACTTTTTGGGCTACATTATTCTTGAAAAAGTTCATGTTTT  
GTTATTTCTTCTCACATACTTTATAAAAAAAGATAATTTTTTAAAAAATAACAAGTGGAA  
CATTATCAAATAAAAAGCATTATAGCGCCACATGCGATGAACCTGAGCTTTTATCTTCATTAATATATAG  
TAATTACAACATGTTATTTGAAATGCACAGCACTTATCCAGAGTTATTTGATATAAAGATTATGACTCAA  
ATTCTTCTCGACAAACAAGA

>Positive Sample 188

AAGAATTAGGTGACAACGCTGTTTTCGCTGGTAAAACCTCCACCACGGTGACAAATTATAAAGCTTTTG  
ATTAAGCCTTCTAGTCCAAAAACACGTTTTTTTGTCAATTTATTTTCTTAGAATAGTTTAGTTTA  
TTCATTTTATAGTCACGAATGTTTTATGATTCTATATAGGGTTGCAAACAAGCATTTTTCAATTTATGTT  
AAAACAATTTCAAGTTTACCTTTTTATTCTGCTTGTGGTGACGCGTGATCCGCCCGCTTTTTGGTCACC  
CATGTATTTAATTGCATAAA

>Positive Sample 189

AAAATTTGAACTCTTTGCAAATTTATCGAGAAAAAAGATTTCGTATTTGCGGGTAATATTTTTT  
GGACATTTGTATTAGGAGCGTTATGTTTATTAATGTCATCCAAAAGATAGTTATAAATCTATGATTGTAT  
GGTTTCTTTGACATATTTATAGTTAATATATATATATATATGTTTAAATTTTATAAAAATCCATCGTT  
TATATTCGATTATTTTTATATGTCAACCTTTTTTTTTAAGAAATGTTTATTTAGTCAAGTTCTTAATGA  
AATGAACGGTTGAAAGTACA

>Positive Sample 190

ACTCGATAATCGTAATAGTACTTTTATAAACTTTAGTGCGGGTACTGTGAGAGTGTGCCGTAACCTTTGG  
TTTACATTTAAGGTGCGACCAGCAATGTCACTACTTTTACAACAACCGCCATATGGCTCGAGAATTTTAT  
TATCACATGGAATGCCTGTGACAAAAGTGTGAAATATCTAATAGAAATTAGATGTAGCTGTCACAAATA  
TTTACACAGGAAAGAGCCTGTCTACGAGTATCTTACATGAAGATTCATAGAACCAATTTACTTGCGAAT  
GTGAACAACCTTTCAACATC

>Positive Sample 191

TCTCAACTTACCCTACTTTTACATTCTACTCCACTCCATGACCCATCTCTCACTAAATCAGTACTAAATG  
CACCCACATCATTATGCACGGCACTTGCCTCAGCGGTCTATACCCTGTGCCATTTACCCATAACGCCAC  
GATTATCCACATTTAATATCTATATCTCATTGGCGGCCCAAATATTGTATAACTGCTCTTAATACAT  
ACGTTATACCTCTTTTTTACCGTATACTAACCCTCAATTTATATACACTTATGCCAATATTACAAAAA  
ATCACCCTAAAATCACCTA

>Positive Sample 192

CCCCTAAAGTAGGAACAAATGTTCCTTTTCCAAAATATACTATGTGTAGTTGATCGAATATCAGTAAGTC  
AAAACGTATTTTACTTGTATTATTATTAATACTCCTTTTTCGCATATGTTTTATCACTTTACACCATAC  
AATAACCACTAAATTTCAAAAACACTTATTTTCAATATTTGTTATAGAAAAATAACCACTAAAATCACCTA  
AATATAAAAATATTCTACCCTTTAGCAATAAGACTGAAACACTTTACTTGGGGTAAGAATACTGCCATGG  
TGTCATTAACATGAAAGTTC

>Positive Sample 193

TCCAAGCTTGCAGAACAAATATCGAGGAAAACCTTACGGTTGTTGAACAGTATTGATTCAACGAGCAGAATT  
GAGTTGGAATTGAAAAATATTGGTCTATGAACTCCGAAACTTTTTTCATATTGATAAATAGAACAGTTAAT  
AAAACCTTATCTAGAAAGACGTTTGTATAAAAATAATGTATAGTATCGGTACTAAATATTAACCTTTCCG  
AAAAATCAAAACATCAAAGTATTCAAAAAGTGCTTGAAGAATATTGATTAGAGATAAAAATTTCGTATGCA  
AGGTGTTAAAAATTGTGTAG

>Positive Sample 194

GATTTTCCTTGGGTAGTAGACTTTCTTTTACGTTATTCCTTTTATAATTTTAATTTTAGTTATTGATTTTC  
AATGAAACAAAAGGAAACTGACGGCTTCTTAAAATAAATATATTTAACATGAAACATTAAAAAAAAAAATTG  
TCACTACACAGAGAGAAAATAAATAAATATAAAGAATCACATAACTATGCTGAAAAAATGAAGTTATTTG  
TCATGAGGAAACTTCTCTCCAAGAACTTTAATTTACTCTTGAAAGTATCAGAATCGAAATAGCAACCCT  
TTAACCATGCTGGTTTTGAG

>Positive Sample 195

TAGTTCGTGCACTAAGGACAATATTACGGATATTTCCAAAATTGGATAATACCTCTCCTTCGTTACATAG  
AACGCAGACAGATGTTTCGTGTAATGGTACCCGACACTCGATGAGACTTTGTTATTTTTTATACGCCTGAAA  
TTAGGAAGAATTTGAGTTGGTTTCAATATTCCTCAGTTTTAAGCAAAACTGTTGTCGTGATTTATTTAAA  
TTTCGTTAATGAAGTTGTGAATTAGAGTGGGATGTGTTATAAAATGTCCAAATATACACGATAAGATATA  
TGAAAAGAATTTTTATGCCA

>Positive Sample 196

CCACGTATTATTTGCCATTTGTTTCGTTCTGCTATCCTAACTAATTGCAGTATTAATACTTTACTAACGCT  
AGAAAATTTTTTTCATAGTCTTGTCTCTTTTCGCTACTGCATAAAATATGAAAAAGAAATCAAAAAACCTG  
ACAGCAAAATGTAAAGTAAGATACGGGCATTTAGCGTGTCACTGCTGAAGATAACGTAAGACTAAAAAAA  
TTTCAAGATTAATCCCAACCTATATATATATATATATATATACTGTTTAGATCAAGTATATCTTC  
CTGCTAAATAATTAATATGC

>Positive Sample 197

TTATCAATTCCTGCTTTTAGCTTCTATTGTATTTGATAAAATATTTTCGGCTTCTTTTATGTGTATGCGAT  
TGCGTATTACTAAATATAAATTTATATTTTCTGCGACCATTTGTCCGTCAGAAAAGGCTCTCAAAAAAAC  
AACACTACCCTTTTACCGGAAATCACAACTAAATGTTAAAATAAGAATTTAACATCATCCATTGATTAT  
GAATATTGAGTGAATGATTTAATGATTGTTGCGATTTCTTGTGGTGAAGGCTATGATATCAGCTATGC  
AGAATATACTAGTAGTTATC

>Positive Sample 198

TAAACCTGTGGCAATCAGCATGGAGTGCTCTACAGTTGTTAAGCAATCGAATAGTGGCTCTTTGTCTTC  
TTGCATGTCTTTATCATAAGTAGATGGGATACCCTTCAAACCTCATCAAGAATCCTGTCAGATCACCAAAT  
ACTCTACCGATTTACCTCTTAACAACCTCTAACGAGTCTGCATTCTTCTTCTGAGGCATTAAGAAGAAC  
CTGTTGAATAGGCGTCGCTCAACTGTATGAAACCAAATTTCTGCTGTACAATATATAATCAAATCTTCAGC  
AAAACGAGAAATATGGTTCA

>Positive Sample 199

TGAAAGGTACCATTAAGTCATATTCTAAGCGCTTGGTTTTTTTTTATCTTATCTTCCTTGTGTCATATTT  
AGACATTTAGTTTAGTATTCTAGGTGCTTAAATAATGAATATTGTCTATAGATGACTAATCATAAATGAA  
CGAAAAGAAAGAATTCAGAGGCGATAACAACTTCCGCGGAGTACGATTAAGATAAGCGTCGGAGGAGG  
AATTTGATATACGAGCTACAACAAGAGCACGTATATATATATATATTTGTATACGTTTCATATACATCATA  
TATACACATTGTCTGTAAGC

>Positive Sample 200

GGCTTACTAATTATAAAATGCATCATAGAAATCGTTGAAGTTTGCCGTAGTAATACCCAGATTATCAGAT  
TCCAAATCCTTGTCAATAATTATACTCCTTTGGACAACCTTCTCTTTCCATTAAAAAATCTGAAATCTCCT  
TAAATTTTAAATAGATTCTGTTTCAGTTCACTAACGGGGAATTTCAAGAGAACATTTTTGTTCTTCGCCGA  
CTGACTATAATCTGTAACATTATTGTTATCAGAGTTTCTCGCAAATTTGTTTTTTCTTGCTAAATCTC  
AGCATATATTTAATCAGATT

>Positive Sample 201

ATCAATCTTTCACACTAATTTTATATTAACAGTTCTACACTATTTTTGTTTGCTTGACTGTAAAAACATT  
CTATTTTATGATTAGTTGCAAAACTTGAAAAAACAATAGAATTTTCATCACATAATTGAAAGATAATGAA  
CTCTTTCAGTCAGTTAGATCCATGTTTTTTGAAGAAAAGTTTACGAACACAGGATCTTACAAAAGGTGCC



TAAATTTGGAATTGAAAGTCTATTGCTATCAAAACTTGTCAAAGATAACATAGCTTGGAACATCTTATCC  
TTTATATGTCCTGCTAAGTC

>Positive Sample 202

ATGAGTGC GGGATCAGAAAGTGAATTACTTACTGTCCCCTAATGTGCACAGCCACGGGGAATGCGGATCA  
ACTGCAGAGAAAAGGGCGCACAGAGTTAGAATGCATCCCTTAATCCGGGAAGTAACAGTAACACGTCATG  
CGGATGTTTCTTCGGTGGGTATGGGTCACAATTTTCGTCCACCAGTACATCACAGCATGCTCTCATTTCCT  
TACTTTTTGCTAGCAGATGATTACTTTCATTTCCGGTGGGATGGGCCACCTTTTTAGTTTATCCTCCGGG  
ATGCCTTAAACAAGAAAATG

>Positive Sample 203

ATACTGGTGGTGAATGACAGCAAACCTTTTCTGGAAAACCTTCTGTCTAAAGAACAATAATCAGTGTAAT  
GTGTAGGCCAGTGTTATGTTTTTCATGAATATGACATCTGATAAGAATAAAAACAACCTGGTAAAATGACTGC  
TTTTTCGGCTTATAAAATTTCTAACATGTACATATTTTTTATAAAATGAAAATACTATTGTCCTTAATTGT  
ACAATTTTTACATTTGGAGGCCAAATTATAAAAATAATAGCGCTGCTACTCCAACCTATATAACCCATGTT  
CTTGGATTCAACCTTCATAC

>Positive Sample 204

GAAGGTACAGCATTTCATTTACTCACTTATTTGATCTTTTCTTTTGTCTGGTAAACATCTTTGTTTT  
AAATGGGCTCTCTACAACAAAACATGAAAAGTACTCAAGAAAAAAAATCTTTATTAGCGTTGGAATCAA  
AAATATATAGCATTAGCAGAACGTTAAAGAGGATATTTGGTTTCTAGTCTAAATGGTGTCCCTTTTCGA  
AACTGTATAAAATGAAAGGTAAGGTTTCAACTTCTGTGGCCTTACTTATTGCGTTCATATTCCGTGAAAC  
TAGTATATATTAAGGTTGC

>Positive Sample 205

GTCACCAAAGCTTCACAGGTTAAAAAATTTACCAAACCTGATTAATGATCGTGATAAAAACGAAACAATTT  
TGATTGTTGAATGGAATTGGTGTGTTGAATCAATTTTTTCATCTCAATGTTGATTTTACATCAAAGAAAA  
TGTTTTGTATCAAAGAAAAATAACTAAAAATGGACACTATATATTACGTCATCTGACATACGACACTGA  
TAACAAATAAATATATAATAATTATAAAGATGCGTTGTAGAAAATCTTATGTTCAACAAACAACCCACAT  
ATGATTAACAGACCATTTTA

>Positive Sample 206

AGCATTGGTACATATTGTGGTGCCACTTTCCGTAATTAAGCTACTAAATTTTTGACTCTAACGTTTATAA  
CATTGAATTATTAATAATGATCTTGCTATACTATTTTGCATACATTATTTTTTGTAGTTTTAACAAGAAGA  
CAAATTCCTTGACTTTACTCACAAAACATAAAACATAAAATGTAATAAAGTCCTCAATGTTACCCGATTTT  
TCAAAAAGGATCAGTGAAAGTGTCCGTAAAGCTACCTTTTTGATACTTTCTTTTTATGAGAATAAGTTGT  
ATTTCTTTATTATGTATGAT

>Positive Sample 207

GTCAATGCCGCTAGTTTGAGGAATCTTTCCATTAAAAAAACTCAAGTCAAACCGGAGTCTGCAAGTGAAG  
AAAGCAAAGTTCTTGCTGCAGCTTTAAATGATGCAAAAACAAAACCTGGATGAAAACGTCTGGAGAACTCC  
TATCTAAAAAACAAACGAATATAGTTTGAACACTCATTCCATGTTCTATGCTTATTGTTGTACATTTATT  
ATTTATATATTCTTAAATATATTTTCGAGAGATCTATACATAAACATCAATTTATTATAATTCTACACAAA  
ATTACATTTAAATATTAATG

>Positive Sample 208

TTTTACGGTCTTTTTCACAAACCATTATACTTGCTAAAGGTTGTAAGGTCATACACTTTTTAACATCAA  
GATTTACAGTACAACAATTTCTTACATGTAATAATCGTTTGCAAATTAAGTTCGCCAAATTGTATCTTAATT  
AAAATCTATGTGTTTCAAGGTTGAATATTGGTAAAAAGAAACAATAATGTATAAACGAACGAAAAAGGAAG  
TGATCAAATAGAGTAAGGAACCAAGGCATTAGGTTACCCGAACGTTATCATATATACGCTCATATTAT  
TCCAAGAAAGACACATTTGT

>Positive Sample 209

GATTTGGAGATATTGAAGTCACAATTTACAGTCCTTCCGACCCAAATGCATCAACAGTAACGGCTGAAAA  
CAGTCAGTTTCTCTGGAGAGCAGCTATTACTCTCAATCAATTTAAAGAGTTTGTGAAAAGCTGGAGCATA  
TACACTTCTTGGGCTAGAGATAATCCCTCGAAACCGGATATTGCCGATATATTCATTAACGAGCTCAAAG  
AAATCTGTCAATGTGAAGATTTGAATGTACCTTTAAAAATAGAGTGGTCAACGTTTTATTACTTATGTAG  
GAAAAGAGAATGAGGTTTAC

>Positive Sample 210

TGTCAAAAACAGTACGTTTATTATCTGGACAGCCAAAAATAAGATCTATTCAAACATGGAATATAGCGT  
ATTTTTATTTAATCACGGTACAATGGAGATATTTGCATGCCTATAGAAACAAGTAATAGTTATCATATTA  
TTTTCTAGATTTTGTCACTGAACTTTTCCACTAATGAATCCTATCAAAATTATATATCCAATATGGCTGC  
ATTCCCAACTAAATATTAATAATGCCGCTAAGTATAAAATGTCTCCGCATCGGTAAAAAGCATTACAAATG  
CGTATTATACTAGCGAGAAA

>Positive Sample 211

TGATGTTATGTTATTTAGTGCTGTCCGTATGTCCTCCTGTTCTTTTTTGGGCTACAATTTAATTGATGGG  
GTGTTATGTTTACGATATTTCAATTATGTTAATATTTAGTATGTTTATATCTTCTCATTAAATGAATAGTT  
AATTTTTACGTTTAGGTGATTTTGGTGGTGATTTTCTATAATATTGAAATAAGTGTATATAAATTGAGT  
GGTTAGTATATGGTGAAAAAGTGGTATAACGTATGTATTAAGAGCATTTATACGGTATTTGGGCCCGCCG  
AATGAGATATAGATATTA

>Positive Sample 212

TTCACACCGGATTAACAAAAAACTGTGTTAATCGGATCCGGGAGAAAATGCTAATATCTCCTTCTTGT  
TTGTGAAATGATGATAACTGGGCTGTTGAACGAAAATGAAACTTCTCAAATACACCTATTTATTAATAAA  
TGTTAATTTATATTTTAAAAAAGGTAATAAATGATCAGGTTTGCATCCTGATTTCAAATCATG  
GCTTGGATTATATCTTAGAGACGTATGGATTTCAAACAAATGCCTATTTGATTGAATATTACAGATCTAC  
ATTATCTCTTGACATAAAA

>Positive Sample 213

CAAATATGATGTCAAAGGCGATAATAGTAACCTTCTAAATGCATTACATTTACAGCGATAGTTTCTTGA  
AGTCGTCGGAATACGCTCTATGCGCTATGGTTGATTTTTAATTGTTTTTTTGTGTTGAGACGCGAAAGTA  
AGGAATATATAAAGAACTTAAATTTGCTAACAGAAGAAATATTTATAAGCTGTTTGTGTTATGATTTA  
TGAAACCAAACAAAAAATTGCCTGTATAATGAAAGAATTTTCATATTTGATAAGCTTCTATGTAATTAAG  
GAAAGGAACCAAACGGGGAA

>Positive Sample 214

CGTCATTGGAAAACCTCTGAAAACGAATTAGGAAACGTCATTGAAGAGTTACGAAATTTGGAGTTTGAAAC  
TGAACATAACGTAACAAATTAATAAAATAAATGATATATAATACCCGAGCAATCTACAGCAAAGCTCAGC  
CCCACCTTTCCGCATTTAATAACCTGCATTTTGTTCATTTCCACCCTCACTCCCCTTCTCAAGTATTCC  
AAACCAATTTAAGTAAGTATTGATATGTAGTTATTTTTAAATAAATATATGTAAGTATATTTGGATGCT  
TTAATTAGGAATGTTCTATT

>Positive Sample 215

AATAATGGTGATAAACTGCAATAACAAAAGAAAATAGTACCAATCCTGGATCTAGTTTTCCCTAAAATCC  
AATTTTTACTTATCAGCCTCACTTCCTAAACTACCTCACCTTCAAAGCTCGATAATAAAAGAAAACAT  
GAATAATATAGTAAACAATGATAATAGTTTCTCTATAAGATTATCTAATTTTCGAACAGTATTAGCTATA  
TGCGAAATATCTTCATCATTGGTACCTTATCATAAACCAAGGCCTGCTTTATATTTATTTGAACGAAAA  
ATTAACCTATATTCTTGGCT

>Positive Sample 216

GTTTCGACGTGAAGAAAAAAGTCGTA AAAACTAAAAAGTCTCTGCCCCACTTTCCAGAAACAGATATCT  
ATATTTTATAACAAAGACGTACGGCATCATTTAAAGTATCTAAAATTTCTTTGAAGAGATCACATAAAAA  
ATTTTCACCTTCTTTTTCTTTTTGGCTGTCCAAGTAAACAAAACATAAACTGCTTCAACCAAAGATAA  
AACTTGAGAAAATCCAAAATGAACAATAAGGACATTTCTTGGTGACAGATTGTTAAGTTTCATTATTTT  
TTCACTTATTTTATAGAAA

>Positive Sample 217

TGGGTCGACGCCTTCGGAATTATTTACGGAGCTTTATAGTAATTAGTCAAGGTTTTTTTTTTCTTATTTT  
TTTCTATTTTATAACTTAGTCATATCAAAATATATCTATTAATTTATTTTCCATATATACGTAGATATTC  
TTCATTTGCATAATTCTTTGGGAAAAAGGAAAACAGTTATAGAAAAATATAAACAAAAAACCGCAACACT  
TCATGATTGCGTCGAACAATATACCTTAAAGAAGAAAAAAGGTTGGTTTTATCACTTCATTAGTCTA  
TTGAATAATTCATAAATA

>Positive Sample 218

ATGGCCAAGTTGGTAAGGCGCCACACTAGTAATGTGGAGATCATCGGTTCAAATCCGATTGGAAGCAATT  
TTTTTCTTCGGCACGTCATACACCTTGAATGAGTGTACTAATTCTCTCTTCAAAGATCATTGTATGT  
TTTATGTTTTGTCTGGAAAAACATATAGTACGGATATTTTTGAAAAACTTTGAAATAATATGTAATTTAT

GTAAAAAATTAAGAACCATTATAAAAGAATATTACCAAAAATGTAACAGATGACATTTTTATTGTTTT  
GAGTTTGTTTTAAATTTGAA

>Positive Sample 219

AGAGAGGTGACAACGTCTTAGCTTAATGAGATTTTATGTAGTTAAATTTGACTTATTTAATTTATGTTT  
TGTAAGAATAAAAATGAGTATGATGAAGGAATCTTACCTCTATTAACTATTTCTCTTTTTTTTTTCCTTC  
GATAAGATGTGCGCAATTCAATATGGAAGAAAGCAATTTGGTATGCAGATGGTGTTCACCGGCAGTGT  
TAAGTTACGAATATATAAAAACAAATTCAGGAACCCGCCGAATTTGGCCAAACATATACCTATATACAA  
ATTAGTGACCATACGCTATT

>Positive Sample 220

GGATTTATGAGCAAAACAAGTAGGCGAGCAAGACATGAACGAAATTGTAATGAAGCGTACTTCCTTTTCC  
CTACAACCTTAAAAAGGTCTCACTGATATATCCATTCGCAATAATGACAAGATTTTGCATGGGACTTCT  
TTTTTCTTTTGAATAAGTCGCGTTATAAGGACAAAACATTAATAAATAATATGTATTGATTCAGTATT  
TATATACAGAAGTAAGTACCGGGGTACCTAAATATACGCATAAAAGTCTCTTTCTTTTTTTTTTTTTT  
TTTTTTAGCTTCCTACATT

>Positive Sample 221

GAGCGAAACAAGTAGAAAAGCAAGACGTAAACGGAATCATGGTGGTGTGTACATTTCTCTTTTTTTATTA  
CACCAAGAAAGCTTAATTGGTACGTATTGTTCTGTAGTAGCATGAATCTAGCGTGGAATTCCTTTTATT  
TAAGGTCGCGTTGTGACGACAAAACATTAATAAACCACATGTGTTGATTTGTAGACTTGTATACACTCC  
AGTAAGAAGGTGCACACCAAATACATGCGCATATAAATTATTTATATAGCATGCTATATTCGTAAAT  
TCATAAAATTTTCGTTAATTC

>Positive Sample 222

GGTTCTCCGCAGAAATTCTACTAAATTACGTATAAATTGTGTATTAGAAGAAATTCAGAAACGAAATATC  
TGAACAGACCTACTTTAGTATTTTTATATGATAACTTTTTGAGTTGTATCCTTTTCTTCATTTATTTTTA  
GAACTTTCTTTTTTTGGCCATAACATAAAATTTAAATAACGACGCTGAAACAAAAAGAAAAGAACACCA  
CGACTAATAAAACAAAATTAGAACATTATGATTAGGTACTTCTTCAGTACGCTTTTCAAGCTACTTCTTA  
CGATAAGTAAACTTCTCACC

>Positive Sample 223

GGTCTTGTGTTTCTGCTTGGCTTTCATAGTAGCAAATAGTTTCGACCTTAATGTAAGAAATAAAAGCA  
ATCGTTAATTTGAGTAAAGATAACCACTCTTCTCTTCTACTATCAATATAATAAGAATAACGCTTATGG  
TTTATTTTAGCTTTTTTGAAGCTAAACATTAATAAAGAATAAAAATGCACGGCATACTACATATTTTA  
AAAACATATATTTTATGATTGACTTTAGCAAAAGTTGGCGCTGGGTACTTTGAGACTCTTCTACAAAA  
CGTTACCAACACTTGCTAGT

>Positive Sample 224

CTTCATGACAGAAAGGTTTTGCATTGGTAGGCGTGGAAGATTACAGATTGTACTCGTCGTTGGCTCAATT  
TTTATATTTTGTGCTTCAAAAACAGTGCCGATCCTTAATGAATGAAAATTCATAAGAAAATAAGTTG  
ATACTAAAAATATAATGTCCTTGAAGTATTTATGCGATATATAGAAAATCTATAAATACTTAAATATTA  
CAGCAGCGTTATTTTTGTATAGACGCCGACGTATAAGAGTCTCCTATCAAAAATCAGAATCTGAGCCCAG  
TATGTCATCTAATTCTGCGT

>Positive Sample 225

AAGAGTTTGGGGTACTGATAAATACTTAACTACTGTATATTTTAAACCAATGCACTCTTGGCACTTTAA  
AAGTAAAGGTATAAATGTAGTTAAAAGTTTTTGTGATAATTGAATGTTTTCATTCGCTATCCCCAC  
GCTACTTTATTTACTTCTTCTTCTTCCAGCAAAAACATTAATAATTTACTCTATAAAAAACAATCATAT  
TTCTATTTATTTTGTGAGTTGACAAATCTTATCATAGTGATTAGAATCTGTAAACCGATCTCAATCGTG  
TCCAGAAACAGCGTGCCATC

>Positive Sample 226

ACTGGGTGATCAACAATGCCAGAAATAAATGAGAAGCTTTTTACTCTTGCTTTTGGCTTCTTCTCTTTAT  
GTTCAAGCCAGCCAAGCTATGTTATAGTGTGAATGTCTTGAACCGTTATAGTTTCTAAAAATAACTTTA  
CATTTTGTATGCAATCTTCATCATCTCGAACTTTTCAACAAACGTTCAACAGTGATGGTCTTCCCCAGT  
GAACCAAAAGACATATGACGCTCGTATGGTATGTTAAAACAACATAGAGGATAGTAGGTGGGGTTTAT  
TGTAAGAAAGGACATAAATAG

>Positive Sample 227

AGGTAGGTCTTTTTAAACGAACGAAATTGTTACGCATTGTATGTTGGGTTTCTTACATATCAATCACTC  
AGAAGCCCATTTTCTACCTCCATCACCGTACTTATAGAATTATTTTTCTTCTTGACACAATATACTGTG  
GCTAGTTTAAACATTTTCGTGCCCTTTAAATATTTTTTCATGGTGTGGACAGAACAACGTCAATTGTAAGGAG  
CATGGAGGTCAAATAACAATACCTCAAATAAATAATGAAGACCCCAAGAAGCCTTGCAATCGGCAGTA  
ATTATATTCATGGTACTAAT

>Positive Sample 228

TTGAAAGTTACTTTCTCGGAATGGAGTCTCACAGCTCCTTTAGGAAAAGCTTTACATGATTTGAGTTAGT  
TCACCTATATATCAATATATAAAGAGGGGTTTGCTTTTGTAAAGAACAAGGCCTGCACCTCACTAAGATC  
TGTTGATTTGGCACTATGCTTTTTAAAATTTTGTATACTCAATTCGTCAAGATTTTTTTTACTAGTA  
CAATCCATACAGTTAACAAAATACTGGGCAATAAGGCGTGCATACTACGAAATTTTTAGTTTTGTTATAA  
TAAACGACTTTTAGCTAGTG

>Positive Sample 229

TTGGGTTTCATCGAGTACGTCTGAAATATCTGAGGGATGCCAGAAAACGAAGTCGCTGATTTGAATTTAA  
AAAATGGTGTGACACTAGAAATCGCCAGAATAATGACATGAGTTTATATGATAGATAAAATTAATAAATTT  
CCACATGTATAACTTTTCAATCTTTTTCGCCTACTATTTACTGCCTAGGCTAATAAATTATATGTTTT  
TGTCTGGGCGCGACATTCAAAAAATAAATAAAGAAGAGAAAATACTGGCTTATGAATACAAAAAT  
TACATAAACGAAGCAAAATG

>Positive Sample 230

AAGACATTGCATTTCGGTAAATGAACACGTGGATGTCCCAGGTCATTTATCTGCCATTGCCTTTGTTTACG  
AGTATATCGTTAATGTTAACGAATACGCTTAAGCGCAATCATTGAATAGTCAAAGATTTTTTTTTTTTAA  
TTTTTTTTTTTTTAATTTTTTTTTTTTCATAGACTTTTATTTAAATAAATCACGTCTATATATGTATCAGT  
ATATAACGTAAAAAACAACACCGTCAGTTAAACAAAACATAAATAAAAAAAGAAGTGTTCAAAT  
CAAAGTGTCAAATCAAATTT

>Positive Sample 231

TTGACTAATGATTTCTTCCAAGGCGTTGATCCCAGCCGTTTCCAATAAATAGTCCATCTCATCTGAAGAC  
ATTAAACGAGTTGTTTCATCCTCGTTTGACATTGTTCTGCGCCTTTGCTTCGCACGGTTTGAAGATGTAT  
ACGTGAAATGCAAGAAGTGGGTTTGTATTCTTATAAGTCTATTAGACTTCTTGCAGATCAGCCCTTCA  
TCTTGTGGTTTTTAGGAATCCCTTACCCTTTATTTTTTTTTTTTTTTGATTCGATTAAGGGCGGGAAAT  
CATGATAAACTTCCACGGAA

>Positive Sample 232

CTTTATATATCTATGTTTAGTATAACCAAAGGGTATTTTCGGACGCAGGCAAGCTGCCATTATTTATAGCG  
GAAACTCTAAGAGTGGTAAATCTATTTCTAAAAAAGATTCAATCAAGCGCCCTCCTTGGTTAGT  
TAGTTAGAAACATGTATTCAGAGGGAATTAATAAAGATGAGTATAATTAGTTCTTGGTACTTGTCTCT  
ATTATTTGCTTAACTACTTCTATTGTAACAAAATTGCAAGCTGCTGGAGTTACTACCCATCTATTTTATT  
TAACAAGAGGTGCTCCCTTA

>Positive Sample 233

TTTGCATCTTCTAACACCGTATATGATAATACTAGTAACGTAATACTAGTTAGTAGATGATAGT  
TGATTTTTATTCCAACAATTATCATATACGGTGTTAAGATGATGACATAAGTTATGAGAAGCTGTCATCG  
AAGTTAGAGGAAGCTGAAGTGCAAGGATTGATAATGTAATAGGATAATGAAACATATAAACGGAATGAG  
GAATAATCGTAATATTAGTATGTAGAAATATAGATTCCATTTGAGGATTCTATATCCTCGAGGAGAAC  
TTCTAGTATATTCTGTATAC

>Positive Sample 234

CCAATCGGACAACACTAGCTCTATTTATACTTTTCTGTTGCTCCAAAAACAGGAAAGAACAAATTTTTCA  
ATTTAGTGTGACCCGGCTAATAATAAAGAGGGAAAGTAATAGGTAGGGTTTACTGGCAAGAAATCCATAT  
TGTTGCTCCCGAATAATATTATAAATCTTGTAATTAATACAAAGTTTCTAGATCCACCTTGTTAAAAA  
TATAAAGTTATGCTTAAATTTCTCAGGGAAAGAAGGTTTTCAATGGATGATTTTACATTTTTGACGAATT  
CCTGAGAACTAAATTACAA

>Positive Sample 235

AGGGTTAAATGATAGTGAGAATAAATATATTCTGGTTACCAAAGATAATGTTAGTTTTGTTCCGCTAAAC  
TTAAAAAGTGTAGCAAAATTATCCAGTTTCAAAGAATCTGCTCTACAAAATTGGGAATCAATCACAAAA  
ATGTCACTTTCCATATGACAGACTTTGATTGCGATATTGGTGTGCAATTCCAGATGATACTTTGGAATT

TTTGAAAAAAGCTTGTTTTTGAACACTTCTGGAAAAATTTATATCAAAGACCAAATGAAGCTTCAACAA  
AAACCGAAACCTGCTCCTCT

>Positive Sample 236

TGGATTTGCATCATTAAATAAAAAGATTTCAAGAAAAAATGATACCAGAAAGTCTCAGTAGAATACACGTCA  
CAGAAAGCTAGTAAAAAAAATAATCAAGCATATAAAAAGTATTAATATATTAAAAAATCTTCATGTAAAC  
CAATTCTTATTTACCTCTTTTCCCAGCAAGCGGGCAACTTCTTTAAGAAAAGTAATCTTTTTTTGTACGTC  
GAATTATCAAAGCTTGGTTACTATATTTAACATTATTGTTTAGTAACAGTATCATCTTAAAAGAAAATTT  
TTTAAAATTCCAATATAGGA

>Positive Sample 237

TACAGTGCTTCGGAAAAGCACAGCGTTGTCCAAGGGAACAATTTTTCTTCAAGTTAATGCATAAGAAATA  
TCTTTTTTATGTTTAGCTAAGTAAAAGCAGCTTGGAGTAAAAAATAATGAGTAAATTTCTCGATGGA  
TTAGTTTCTCACAGGTAACATAACAAAAACCAAGAAAAGCCCGCTTCTGAAAACACTACAGTTGACTTGTAT  
GCTAAAGGGCCAGACTAATGGGAGGAGAAAAAGAAACGAATGTATATGCTCATTACACTCTATATCACC  
ATATGGAGGATAAGTTGGGC

>Positive Sample 238

TTCCATTGTTATTAAGGCTATAATATTAAGGTTATTTGGGTCTTTCTCTCTCTCGGCTTTATTTTATT  
TATAGTTTCTATCTTTTACGCTTTCAAAAAATAATATATATGGCGCTTCATGAAAAGAGAGCTAGCTACAG  
AAATATAAACAGTCATGGATGAATAGGCGGCGGCAGCTATGCCGGTGCATGCGCACAGTATAATGGACTT  
AAACTGCCTTAGTACAACCTGTTCAAGTTATTGAATAGCATTATATATTAGTGCCAACCAAAATATGAAAC  
CGATGCTTCCAACCTGTCACC

>Positive Sample 239

GTTGTATTGTGTTAGTTCCTGCAATCACAACAATGGTGAATAAAAAATATATGAAAAGCTGGAACCTCAT  
TTGAATTAGTTTACTTCACTAGGCTCTTTTATCTTCACTTATTGTTTTGTGGTGTCTATTTTTTTTTACTG  
ACAGTTTACACTTTTATAGTCTTTAAAAAAGCAAAAAAATAATTCTTTTATTTTTATCCCAAGATAATA  
AATATTTATGTATTGGATAGTAGTATAATTGAGTATAAAAATTATTTTTGTAGTACTTTTTCAAACATAAT  
CTCTGCAAGACATATCTTCC

>Positive Sample 240

AAAGATGGCAGTCATTGTATAGAATACCACAATTTGTGAGCATCTCTGAGGTTTTTTACAAGCTTCCGTA  
ACTCATAACAGACTTCTATCGTCCTACTCTAGTATTATTTACCTATTCATAACCACTTTTTTATCCTTCTA  
TTTTAAATTTATAGATGCAAAGGGCGGAAAGAATTGACTGGAAAGTAAACTAAATATAAAAAATATCGCCA  
ACTTATTCATACAATATCGTAGCAACTGACAACCTTTTAAAAATCTGCAAAATCTTTGTAGTGTTCCTTA  
ATAATGTTTAAGCTAAGGT

>Positive Sample 241

ATTGAATGGCGGTTAGCTGTTAAGCATTGAAAAAGTAGCTCTCATCGAACTCTTTCATGGTGATGAAAT  
TTTTTCATCTACTTACTTAATCAGTGGTCTACTGAAACAGCCTTCGGGTAATGAAACGAGCGGTAACGCT  
CACAAATTTTTCTTTTTACGAACAAAATATAAATTTAATACTATGATAAAATCTGCGGTGAGACGGAAAA  
GGATAAGAAGTAAAGTATTATTAGAGTTAAGATATGAACTGTCCATTTAACTATGGTTGAAGAAAAA  
AAGAGCCAGGATGAAAATTA

>Positive Sample 242

ATCGTTCAAAGCAACAACCTTCGACGTTCTTTCTTTGCAAAGCAATTCTCATAACCAATCTACCGATTCTA  
CCGAAACCGTTAATAGCAACTCTAACCATTTTGTGTTTGTGTTTGTGTGATGAATTTAATTTGAAACTA  
AGTTCTTGGTTTTTTTTAACATTTAAACAAACAATAATAAATGAATAGACACACAAGAAAAAACTATCT  
TGAATGAGTGCAACCTTTATATATTCTTCCAAACCTACAAAAAATTGCAGGTCTGCGATCACTGGGTAC  
TATCAAAACACATATTAGCA

>Positive Sample 243

TCTTGTTGTTTTCGGATATTCCGTCATTGAGCAAAAAGTTGGTTTGTAAAGACGAAACTGTACTTTCATT  
AGATTCTCGTGTTCCTCATACGCCTTTATATGCTATCACAGTTACCTTATTTGTCCTTTTTCTTGTAG  
AGCTATTCTTATCTGCTTTGACTTAACTAGCGTGAAATTAACCAACGCGCTTATCTAATCACAAT  
AAAAGATCAGACTGTGAAATTAATAAAAAGGAAAGGATAAAACGACAGATATCGCACTAACTTTGTTAGA  
AACATTATGCAGACAAAAGA

>Positive Sample 244

TCTGCGAATTCATACTCCATAATAGAGATTTTGGATGCCGAGTGACAATATAAATGGATACTTACAGAAT  
GAAAAACATTTTTTTTGTGTCGAATTTCCCCACTCTTCAATCAGTTGATTCATTTTTGTCTTTTGTGAGCTA  
CTCCTCTCCAATGATCGAAATCTTGTTTATAATCTATGAAGTCTAGCGTTATATTGTAAAAGCTTTGAAT  
TGACAACGCTCCACGGCCATTTCTTCTAGTATTGGCTACATAATAGATGAACGTCAATTTTTGCTGCAGAG  
TGAATATGCCAGTCTTCCTC

>Positive Sample 245

TTCAGAGCAATACGTGTTTATTTTTTCACAACTTCGCATGGCATTATGTATCATTGCAGCGTAAATTTTT  
ACATTTAGTAATATCTAATAACATATACACAAAAAAGGGACAGATTTTTGAATTAATAAACCAAGCGTA  
AATCAGTATTGCTCTTACCGCAGTAGGGGGAGTTATCTACTCCTGCTTAACGTAGAGAAACAATAGTAAA  
AGTTATGCTTGTGTTGGAATAAAAATCAACTATCGGCTGGCAACTAATAGGGACACTACCAATATATTAT  
CATATACGGTGTAGACGAT

>Positive Sample 246

TTAATTGTGACGAAGGGCCCAAATTTGATGGGTCGGTGTAAATGATTAGTCCTCATTGTCATAATAAAGT  
GTGATGATGGAGGCAATGATGATATACGGTAGTACTACTGCTCGAGGTGCTATCTTTAACCAATCCTTT  
GAGATTCTTGTGCGCCACGGAGTTACTACCTTTTACAAACCGTAATGTCACATTTTGCATATATCTTATGT  
ATAAATATATAGTTCACTTACTACTTGTCTCGTTTTGTTAACTTTCTTGTGTAGTTCTTCTTGTCTT  
GGCGTTTCCCCCTTTGTTTT

>Positive Sample 247

GGTTATCAATTATTAACCCAATGTAGCGCATGCAGCTTATGGCTGAAGGTTAATTTTGACATCGAGGAAG  
AGCAAGAAGGACAATAATGAAAATGGGAGGGGAAATTGAGCATATCAGATAAATCTGTTTATAGAATTAT  
TATTTTACTTCGTGGGAAATCGAATGGTGTATATAAAAGAGGTTGTAATAATGACGAAATAAATAGTATT  
TAGGCAACTAAAGATAAAAAAATATTATTTATTTTATTCGCGGTGCGTTGCCAGATTTTTTTTTGACATG  
CGGAATTTTGGTAAAAAGAA

>Positive Sample 248

AATGCTAGGCAAAAATAAACGAGAAGGAAGGTGAGTTTTAGTTCATTGACTAAAAATGAGCAAAAAAAGT  
CAGGAGTTTTTGTGTTGAAGGGCACTTCAACTCTCGAACTATGGATTTACAGTTTCTTCCCTCGTCTTTTT  
AAGTAAAGTATTTCAAATGACCAAAATGTAATAAATTTGAAAAGGGCCCTTCTTTACGAAAAAAGAT  
CAAAAAAATGTTCAAACTATTTACGAAATCAAGACAAACATATAAAGGAGAAATACAGTGGAGATTA  
GATAGTAATGTTTCGTAATAC

>Positive Sample 249

CCCGGATTCATAAATCCACGTATTTTACCTGCATCTTTATTGAGTGCTTAGTAAAAGTCAGTTGGTGAAA  
TTCCGCAGATAAAACAGCATATTAGTTGCCTGAAAATAGCCTTATGTGTTGGTTTGATACGTCTTTGTCA  
TTATATACCCAAAGGTTTGTAGTTCATGTTGCGGGTGGTATGAATAAATTTTTCGTATTTAGTGATTAT  
AATACTTATTACCCATTTCCGGCGGCTAATAAGGAATCTGCTAAGATAGGTAAATGTACAATACCATCAAT  
GGCTTCTAAAAGTTTTCAA

>Positive Sample 250

AACGGAGGTAATAAAATGAAGGATGAGGGAAAAAACCATAATTTTAGGCTGAAGCCCATATTGTGA  
TATTTTTAATGTTTTCTTAGAAAAATTAATAAACTTCTCAATTAATGTAATAATTTACTTGTGGCGAT  
ACCTTAGAGGATTCAAATTTAACTAGTGTAAATATACGAACTGGTAACACTAATGTTTAGATACCTGTAT  
ATCATACAAACCATTCAAAGTGTATAGGAGTATGTTACAAACCGTAGTATTATGTGCTACATGAATCAA  
GTATAGATTTAAAATTTCTT

>Positive Sample 251

GCTTAATCGCATATCCCAGTTGGCCCCGAAAGAGAATGCACATATACAAATATATATGTAAAGGGAAATAC  
CTTGTGACTACACCTATGCCTAAGTTTCAGTATCTGAACTAGGATAATTTTCGATTATAACTCTAACATTT  
TTTACGTTTTCTCCATATTTTCAATTTGTTCTTCTTCAATCAAAATAATAAAAAAAAAAAAAATCACAAAA  
TGACTATAGTATTTTGTAGCCCAACATGACTGCGAAATTGCTATTAACAATGATTAGTCAGTAGTATTGAA  
TAACTTAGAATTTAAAATA

>Positive Sample 252

ATTTGAAGATGCAGCCAAGGCTTACGACTACAACATTGCCATGGTGGAGAGGTAGTCAAGACTATTATC  
TTTGGTCTGAATGAAAAGTGAATACTTTTCCGGCACTGGTTCATGTCCATATATATAGACCAATTCAAAA  
GCAGTAATACTTGAAAATAACACCGAAAAATAAAAATTTAAATAGTAGACACGTTTAAATGACTTAAAAAC

TAACTTTTTCATATCTAATATTGTAAAATGGGCGGAAAAAGCTTAAGAATATGTTATTTTACAAATCAGA  
GCGCTGACACATATAGAGAG

>Positive Sample 253

TCTAGTAGAAAATAGACGTAGCTGTCACAAATATTTACACAGGAAAGAGTCTGTCCTACGTATCTGACAT  
GAAGATTCATAGAACCAAGTTACTTCCCAATGTGGACAACCTTTTCGATACCATGTCAATAGCTTCCCCTT  
ATGTTCCGGTGTCACTGTAAAACGGATCAAAAACAAACCTAGAGGTACGGTGGTACTCAGATCATGCATGA  
CCTCTGGGTAATTAGCACTTCTCCCGCTTGTGAGATTCTGTATATAAATATTGCAAACAAAAGGATA  
GAGCGCGGATGGCAGCCCTT

>Positive Sample 254

ACTCAATTGGTTAAATTAGTACTAAGAAAGATATTCCGGCACATGTATCTACAATGATTCTCGAAATTT  
GCGCAGATGACAAGGAAGGAGAGGATGTTGAAGTTCCTTTCATTACCATTTCATCTATGAGTAACTAATTA  
ACCAAATAAAAAAATAAATTAATATATACATTAATATGTATATATATATGTATGACTTTTGACAAC  
TTTTCTTTGGTAAAAACTTATTATTATTATTATTATTATTATTAATGTAGTCTCGAATATTTGAGTA  
TGTTTTAGTTTTTTGTTTTA

>Positive Sample 255

GTTCTTTTCTTTTCATTTTTCATCTTTATTATCTAGAGTTTGTATATAACATGTATCCTATATTATCTT  
ATCCTATCATCATCACTTAACCTGTTATAATTCTCCCATATACTTATGTTTTCGCCTTTGATATTTACTA  
GTCGAAGGAACTTTTTTCGCAGTTAGTAAACGTCACGCTCGGAACTAAACATTAATGAATGAGATGCATTT  
TTATAACAACCTTTTACAGGCTATATACAACTAAGTGATTTTCAATACATTAAACTACCAGAATGGACA  
CCAACCGATATAATGTTGGC

>Positive Sample 256

TACGCCATTGTACACAAAAGTATTTTTTTATATTTTTTTTACAATTTTTTATAATTTTTTTTTTATGTTTA  
GTGTATATTTGCTAGAAAAGAAACAAGATCTTTTTTGGTAGTGAAATGCTTAACTTTGTCTCTTTTTCC  
TTTTTACTTTGGAAAATGCCGACGCAAGAACATAGACATCTGCGAAAACCAAAAATAAAGTACCAATTG  
TACATACAAAACAGAGAAAAAGTTCATGAACAGAACGTTACTACGGTATAGCAAGATCTTTGAATACAT  
CCATTACTTCGGATTGTTCA

>Positive Sample 257

CACTCTCATTCCCCACACATAAACTTGTTTTATGGCATCCTTTTCATTTAGCATGTCTTTATTTCCAAAC  
CTTTCCTCGTCTTTGCAATTCATTTAGCGTTTGCTCGAGAAAGCATCACGTTTTCACACATTATCGTTCC  
TCGCTATAATAAAAATAGTTATAGAATTTACTCAGATTTACATGTCGTACCTTTTTAATTGTAAAAAAA  
AAATTTTATGATACATAATTACCTAAATATAATTCAGAATCAAACATACTTATAGCTATTTGTATGCTAT  
TAGGTGGTCTCTGCTATAAAA

>Positive Sample 258

GTTACTTAAACGCTCTTCAGGCACTTCTTATTTATTATGACACGTACAAAATAATAAATTCGTAGTTATA  
AGATTATCTTATCATATTTAAAATATCTCTTCTTTTCAGTTGAAATTTGGGCCAAAATTTTTACCCCATAG  
CGTTAAAATTAAACAAAAACTGCTATTTCCGGTGACAAATTGTAATAATTCTGAAAACGGAAGAAACAAA  
ACGTTTAAAATGATTAACCTTTGGTAAAGCAATAATCTACAAATAATTGGAAAAGGAATAGTAATAAAGA  
TGGGGAGAATTATGAAGAAG

>Positive Sample 259

GGTATTATGCAAAGGAAAATTAAGGAGGGTTTACTGTGCTTTCTCTTTTTTTGAGAAAATGTCTTGAG  
TAAAGTGAGGATTTTACTGTCAAATCTTTAAAGCTTGTGTTTGAACGATGTCCTGCATTAAGTGGGAGTT  
TTTCAAACGGGAAAATACAAACAAAAAATGAAAAAAGGGACTTTAACTTTCTGCGAGA  
GTATGTTTAAAAGTATATGTAATGCACTTTTGGTATGTTAAGAGGCATGCACGAAGAACCATTCTATAAG  
AGACTAAACATCTATATATT

>Positive Sample 260

TGACTCTAAAACGGCATTGTTATATATCCCAAATCGCGGAACGGATTTACACTAATTAACACATGGCCA  
ATATAGGTATAAATAATTCCATTCTTAAATCTTTTTTCAAATTTTCATTGATAGATTCATCAGATATTT  
TTGACAAAAGTGTCAAATCAGAAATACCTACTTCTTTCTTTTTATTTGCATCAAATGTAGCCTTTTTGAT  
TTTTGCAGATCTCTTCTGGGCTCCTAACGTCCTTTCTGCGTGCTCCCTTTTTTATGACAGCCATTGAC  
GGTTATAAGTATTTCTCTTT

>Positive Sample 261

CAGGCGTCATTTAATGTTGATAATGGTGTACGGGAAGTGACTTGTAAGGTAGGGGAAACCGTCAGTCT  
ATCACTAGTGGTGTATCTGATGGAAGTGCCCTTTTATATTTTTGCCGTACACAGGTAAAGAAATGAAAG  
TACTAATTATCCCCATACTCTTTGTTTCTCTTGTGTTGTTTATGATCAATCCTTCTAATTTAATCATT  
AATAACTAAATATTTAAAAAGATGTAATTGCCGCAAAAAAACTCTCAATTATTTACTATTTTGAAACAG  
TCTCTCAGATAGTATGCGCC

>Positive Sample 262

TTAAGTGTGAGGAGGTTAATGAGTTTGAGAATCCCCTTTTCTGGAATCTCTCGTAGTGAAAAACGTACT  
AAGTAAAGTCGTGCCGCCGTGTAAGTTTATTATGATTTTCGAGCATGCATCTGGAACCTATGTTTACAT  
ACGTACAAACGGTATTTAAAAGTTTCTATTCTTAGCGTCAATTGCCCTTTATCGTTTTGTTAACCAATTG  
TTGTTTTTATTCAATTATGCCATGACCCGAAAAATGAGCAAAATCGGTCAAAGTAAATAGCTAAATATTTG  
GTCTAAAAAGTAAGAGAGAA

>Positive Sample 263

CCTGACTTCGATGACAGCTTCTCATAACTTATGTCATCATCTTAACACCGTATATGATAATATATTGATA  
GTATGACTATTAGTTGATAGACAATAGTGGATTTTATTCCAACAGTTTCATACTTATTTAAATGTTTAG  
GTTGATATATTGGTAATGATATGTTATCTTACTCTGAGATGCAACATATATGCTACATACTGAACTCATT  
TATCCAATATTAATTAAGAGATTGGTGAATTTTGAGGTATTTGTTGGCAGATCTAAACTTCATCATGCT  
CTTCTTTTTCTATGTATCTA

>Positive Sample 264

ACCGCTTATACACTACATGATAATGAATATATCAAGTCGATCATCCTTTTTTATGTTTTAAAATACTTTA  
CATACTAACTGTGTTTTTACTTTTATCTAAAAAAGAGTTGTTATGAATTTGTGATTATTTATATTTCCA  
AATATTTATGATCTCAAAACGTAAAAAACATAAAAAAAGTGTTAACCAAAGAAATTGAAGAAAGATA  
GATAAATAAGTTCCAAAAGTTCTATGAATTTTACAGTTGCATGGCAGATAATGTCTTCTGCTAGGCAAAT  
GTCAAACATGAACTGAATTG

>Positive Sample 265

TTTTCGGACTCATACCATATAGAAAACATTTTTTATGCTTCTTCATTTACTTCTACTTGTTTATGTTTAT  
TTGTAATAATTACATTATTTAATTTCTTGAAAGTAAAAAAGTTGAATTTCTGAAATAAATAAAAACTAGAG  
AAAAATTAACGATGAGGCATGCGACGGAAATCAATATTGAAACTTCTCAAAGCTGAACCACTGAAAGGGT  
TCTTTAGGACAATTTTCATTCCCTTAATCAACAAAAAATGACTAAAACCTACATATTTCTTCTAGAAAA  
ATACATACGCAAAACAAGAT

>Positive Sample 266

TCAATCTTCATTTGTTTACGTAATAATGAAAACGTTTTGTGTTAGAATTGACAGATTGAAGTTTAATTTTA  
GGTGTGCGGAGAAACATTTTAATCCCTTTTTATGAATATAATTTAAGTACTAAAAAATCACCATAATTA  
TACAAAGTAACTGCAATTTAAAAGTACGTTTATAATTAATTCACATACACATGTTATTGTATCTAACTAA  
ATAGTCTCGAAATAGTTCAATTGAGTACGCAAACTAACACAGTCAGTACAGATCGTAAAGTTTTCCGTC  
ATAGGGCCCTGACGGAGAAA

>Positive Sample 267

TGTTGACGTAAACTAAGACATTCCATTTATAGTTGAATAGTTTATTAATATAGGTTAATCAGTCATAAA  
CAAATTTGTACCCTTTTTTTTTGAATCAAAGTACTTTTTTTACGAAGCAGTAAAACGTTTACGAGATTCTC  
TCTACATATGCTCTTTCGCGTGTAGCGACATTTTACCATTAGGTGAGAATTTTGTGTTACAAGCTGGATG  
TCAGGATGATACCTTTGAAGGCATAGTTAAATTGGCTGGGAAAGGAACGGAACCTTTTCTTTCCGAGTT  
TCGGCCAGATATTTAGGCTT

>Positive Sample 268

GGGAAGAGAAGATTGCATAACTTCAACAATTGTTTTGAGCGTTTCTTTTAGCATTTTTTTTGTTTGGCTT  
TTGTTTGTCTTTTGTGTACTTTTCATGTATTTGATCTTCCATGTGCAAAAATAAGTAAAAAGAGCTGA  
ACTAAATGTAGTATTAATAAACAAGAACAACATAAAAAAGGAAAGGAGAAAATGGAACAATTGCTTAGTC  
AAATAATGTGAAGTTATAAACTGCCGGAAGCCTATAAAAAATATTTCTTTACTGAGACCGTGATCAGG  
AGAACGAATGTGTATTAATA

>Positive Sample 269

GATCCTTCGTTATAAGCTATGAGTTTCTTAGTTTTAATGTCATAAGTTTTCGAAGCCACCAACAACATAAG  
CGGCTTTACCATTCTTGTCAAGTACTTGTAAGGTTTACGAAAGTGTCTTTAGAGTTCCATTACTTGGCAT  
TGTCGGCGTGCAGAGCTTAAAAATATTGTTCTCCATGCAGTAACATTGCATAATTGAAGTTATCGACTAAA



TTGTCCATAGCTAGTGTGGCAGTAGCTTGCATAAATGGAATGACGGCGAACGTGGGCAAAACTTGAAGT  
CTGGATCATTCTCGTAGGTG

>Positive Sample 270

ACTATGAAAGAAAGTAAGGTATTTCTATTTTTTTACTTTTTTGTATTTTTATTTATGTTTTCTAGGAAAT  
GTAAAAATAAATCTTTTAGTAGACAGCGAGATGAAAATAATCTGTGTGAGCTTCAATCAATCAATATGA  
TTTCCCCGCATTTTGTGGATTTTTAATTGATTCCGATTAATCCGCTGGTAGCAGTTTTGTTTCAAAC  
TAATTCAGCTCCTTACTCCCCATTTCTTATTGAACTTTGGGGATTTCGGAGTTCCTTTTTTTTTCCGCC  
ACTCCGATAACTAAACTTTG

>Positive Sample 271

GAGATCCCACAACTGAAAAAATAGCAACAAAGTTTTGGGGGAAGCATTAAAATCAAGTTTACCCCTCT  
TTACCTACATAAGAGCCAACGTAATTTTCTCTCAGTATTATATGTATTATCTCCGAAGTTTATTATTCTT  
TAACGAAATATAAAGAAAAATAAGAAAGATTAAGACCCTAAAAGGTGTACCACTACGATTCAACAAGCA  
CAACGAATCCTATCCGTAATATACTTTTGATTTCTGACTATTCTAGAAAAATTTAGTTCATTTTTTTTC  
CCTTTTTTACTTATTGTAT

>Positive Sample 272

AACATGCAAATGACACTGTAAAATGATTCATTACCCTGATTATGGAGTGATTTTCTTTCCTTTTTTTTTT  
TACATTTAGTTTCATTATTATGCAAATTAGAGGGGTATACAGTTGAGATTTTAACACTTTGAATAAAAAG  
TGTTACAGAGGAAACCGACGCAAAAGGCTTGGTGACGCAAACTTTTCCATCTTTATTTACCTCTTCAGA  
CGGTCTAAGACCTTTTGAACGTATCAATATAGTTTTATCATCTGTTCTCTGTTGTTCTCCGTTACTAAG  
ATATTAGTCAGCTCTTGAAA

>Positive Sample 273

TATTGAAGATGTCCTCATCGGACTGAACTAATGATTCCGGTTTTCGCATATATACATGGCTTTGGCTACTT  
TTAGGTTTATAGTTCTTGCTGTTTATATCACTAATATTTAGTATATAGCTGCGAAGAAAGAAAAAGAAA  
TATTCACCTCTAGGAGCCAAAAACATAAAAAAAAAAAAAATAATTAATAAAAAACTTTTATTGAATGCTTAATT  
ATTTAGTGACGCGATTACCTATATACCAGGTTATTTATTTTTTTCTTTTTTCAAAGGAAAACAATACAAAA  
TATTACTGTTACCATTTTTG

>Positive Sample 274

TTGATGATCCCAATTACTGTTTTATTGACTAACTTTCACTGAAATGTTTTATTCTCTGATTTTATATTT  
AGTTGGCGAACTAGCTCATCCTAATTATAATTAACCTTATATATAGCATAAACCGACAATAATGCGTGGG  
TGGTCTCCATGCCGAATTTGTGAACTGAATTATTATCTAAGCACTGGATCGATCACCTAAGATGATAT  
ATTATTTATAACTAAAACGCAGCAGCATTACACTCCAGAGTAACTCCTGAATTTTCGTCATGGCATGTACT  
TATACTATATAACCAACAAA

>Positive Sample 275

CTAGGTGCGACGACGACTGATTCTATTGGGTTATCCGACACATCATCAGAAGATTCGCATTATGGTAATG  
CTAAGAAGGTAACATGAGAAAACAGACAAGAAAAAGAAACAAATAATATAGACTGATAGAAAAAATACT  
GCTTACTACCGCCGGTATAATATATATATATATATATTTACATAGATGATTGCATAGTGTTTAAAAA  
GCTTTCCTAGGTTAAGCTATGAATCTTCATAACCTAACCAACTAAATATGAAAATACTGACCCATCGTCT  
TAAGTAAGTTGACATGAACT

>Positive Sample 276

TGTGATAACTGTACTGTAAATTTGAAGTTATCCATGCCTCAACCGTGTGTTTACTGCTGTTTTTCTTTT  
TAAACAATTGTGTAGACTTAACCTCTGCGGGCTTGAATAGTGCTTCAAAGGTTTCAGGTAGTCAAGAGGT  
TAGCTATATAAACAAGATGACTTTTCATCCTTTATTTCTTTTATTTTGTTTTTTGTTTTTTGCCTTTGTG  
GAAAAAAAACAATCTACAAGCGAAAAGAAAAATTTTGGAGAAAAATATAATTTAGGATTACAAGAAAGTG  
ATAGAAAAATGTACAATCTT

>Positive Sample 277

ACTAATGGAATTTGTTTAAATTGAACTTGACACCCGAGCAAAAGAGCTCACATTTTAAACGTTTAGTTCATC  
TTGCTGTGAATAATCTAAAAGTAAACAATGGACAAAAAAGTCCACTGGACGTCAAATCTTTTTTTATTGT  
ATTTGGGACATATGGCGTTGATAACTAAAGTTTAAAGGAAGTAATAAGTGAAGGTTAAATCTGGACCTCT  
TTACTTTCATATTAGAAGTATAAAACACACGCGGATTGGTCCATTATTAGAATACGGGTACTACAATAAT  
GGTTTTGATAGTTACTGTAC

>Positive Sample 278

TACCGCCTCTGTGGCAATTGACAACACTTATCCCTATCAAAGACAATACAAAGTATTTGTTACCGAGTGA  
GATTATTTAGTACAATATGTGGGTAATAAAAACTAATCGGAGATATTTTTTTACGTTTTTTGATGCAAAC  
GCAATAAATTCTTGATTTTTGAAATTTTGCAGGACATCAAGATACGTTTCTTTTAAGCAGTTTGGATTGC  
TTCTTTTCGTTCCGAAAGTAAAACGTAATGAAAACCCCTATAGTATTGTGACGCGTTTTCCAACCTCTGCC  
TTAGCTTGATTTGACGGCTT

>Positive Sample 279

ATAAACTTTTTAATAATATTTATTACACGTGATTTAATATATCCTGTTTTTTTTTTCATCATTCTCTTTCT  
TTCTTATGTTAACCTCGTACTACAAGTTTTCTCCTTATAAAAAGCTGACTAAAATTAGAGATTGATAATC  
ATAAATAAATTTAGTAGCCATTTCCATTTTTACATTTTGATTTAATCGACTCAAAGTTCTTATTTGAA  
AGCTAGTTTAGAACTTATTTGTTTGTCTCCTTGATGAATATAATGAGAAGAAATCCACTCAGATTAATA  
TGAAGATTGTTAACGGCAAG

>Positive Sample 280

CATTGTTATATATGGAGTTTGCTGCGCGCCTAGGCGTTCTCGAAGTTTCTCCTTTGATTTTACTTTTTGG  
AAGGGCTTTGGACAATTTAAAGAAGATAATTTGAAGTACCCCATCAAATGCTAGAATGAAATATTTAATA  
TACTAAATTAAGGCTGGTATTTAAAACGTAATCTTATGTGTAGAACCCTCAGTGAAAAAGCGCTATTATT  
AATATAACAGTATTTTACGGAGCTTTTTTTATTCAAAAAGGTTTTCAAGACTTGGCAGAGGACGGCTGC  
ATTCTCGAATGATAATATAG

>Positive Sample 281

ATTAATATATCAGTACGTGTCTCAACTGGAATCGTATAAGGTTCTTGTAAGTACAAATTGTATGCAGAAA  
TTTAAATGCGAGAACAACACTTGAATCTCCCCCGCATTTAAAAAATATCTTTTTGAACACAGTGCAACT  
GATTAAGTACCTGTAATACATATATATGTTTGTATACGTATGTATATCTAATTATTTCTTACCGTCAA  
ATCATAATTATTTTTATCCGTTTCGTAAAGCAATCCAGTGCTAAATACCAATTGTGAGGCCATCGGCTTAG  
TTTGGAACAGCAGTGTAGAT

>Positive Sample 282

GTTTCTGTACCGCTGTTATTTTTAACATCCACTGCGTTTTATGTATCTCTAAAATTGTGCGTTGCCTTTC  
TTTTGTTTATATTTTTGTTCAAAAATGAGTTAATAATGATTTTTTCATCTTCGGCTTACCGGTCTTGAAA  
ATATTTGTTAAGACAACAGTGGATAAAAATAAACTAAACAACCTCAAGCAAAAGTATTCCACTTCTTAAAC  
AAAGCCCAACTGAAAGGTTGCGAAATACTATGTCAATTTGATTTAATCATCTAATGCTCGAGAAAATTC  
AGAGCCGTAATACTTAAGTA

>Positive Sample 283

TATCTGTATTTTTAATGCAATCATAGTATAAAAATTTTTAACCAAATTCAAAAATTATAATTTTTAAAA  
GTTTATGCTTTTGTCTTTTATATTCAAGTCATTTGGCCATTATTACGCTTTTTTTTTTTATTAGGTAAGT  
GGTTTCAATAATTAATTTCTTTAGCGGGAAGGCTGACTATCTATAGTATTGAAGATAAGTTAAATTAATG  
TTTAGTTCTGATATTTCAATTTTTATTATTAATTAATTTGCACTATTCGCCATGACGGGTTACCCGAGT  
ATTTATTTTGCTTTTCGTTAT

>Positive Sample 284

ACCAAGACATCAAGAAGGTCAAACCTCTGTAAAGCTCTTGTGTCTTTGTTATATGGGTACAAGATATAAGA  
AACATAACTATTACATACGAAAATGTGCATGTTATCTATATCCTTCTTTATATAGATGCTGTTAACTTCT  
TTTTTTTTTTTTGGGAAAATCAACTGTTAAACGCGACAGTAAAAGCAGCAAAACATTAATTTTGCTTCCA  
AGACGACAGTAATATGTCTCCTACAATACCAGTTTCGCTGCAGAAGGCACATCTATTACATTTACTGAGC  
ATAACGGGCTGTACTAATCC

>Positive Sample 285

ATCTGCAGTCCTCTCCTCTAGTACTTCGCTGTTATGGGCATCGAATCATCATTTATTACCCTTGTCGAC  
CTTTTCCGTAGCGGTGTGGTAAAATTTGTTAAAGTTGGCTTTGTTGAACCTTGGTGTTTTCCAGGGCGGCA  
ATGACGGTAGTTGAAACAACCTGCCTTCGTTCTTATCACCATTTGGTTCATCTTACTTTGTCACAGCTA  
TTTCTTTCCTTCTGAATTTGTCTTCCAAACCTAGTTCCCTGTTCTTAATTTCTTTTTATTAGGTTTT  
TTTTTTGTTTTGTCAAGAG

>Positive Sample 286

TCAAGAAAGACCTTTTTAAGACTCCAAGAACCCTCACTTATGGCGTATTGTTTGTATCAGCACTTCTA  
TCTTCGATAAAGGTTTGTCTGTCTTATATTGTTTACATTTCAAGTCTAATTCTGTGCTTTTACCGAAGAG  
GAATTTTCATAAATACGGAGAAAATATAAAAAAAAAGTAAATACAGAAAATAGAACAGTTGAAGCAGAAA

AAGAGAACTTGCTAAATAGCTGTCTCACCCAGACAAGCGTATACTTACCACATTTAGTCTTTTGCAATCT  
CATTCTTGTTGAAGATAACT

>Positive Sample 287

TTTCGTATTCGGTTTTGTACCTTTAGCTATGATCTTAGCTAATTGAAGAGGGTGGTGTGATCTTTAACCA  
TACCTTATTATCTTTACAGCTGCTTACCATTTTCTTATATTGATTTTTAGCGAAAGATTTTTATTACAAG  
CTTTTTTATCCTTAATGCTCGAATACTACAACAAAACAAAAACATTAACAGTTTTTAATTTGTGAA  
CAAATGAATTACAAGGCCTTACATCTTATTTAGAATATATTAAGAAACAGAGGCCAACATGCCTTCTTA  
ATTATATTGATATGGACCTC

>Positive Sample 288

TTAGCGTGACGATCTTAAAGGCGTTTTTATGTTTATTCGCTAAAACCCTTCTTATTGTCATTTTCGTTAA  
CATACTATCTAACGTATTTCTGTTTGTGAGTAATTTTCAGTTAATGGATGGTATCAGACGAAAATTAAT  
AAATCACCTTCTGCTTTATAAGCAAGATATAAAAAAATATGGATCGATTGATTCATTTCCATAATGAT  
CAATATATAATAATAATAGGACTGCTAGCTAATATACTCAATATGATTTGTTTCATATTCTTCGCAGGT  
ATATATAACCATCAAGTAAT

>Positive Sample 289

TACCACCATTCAAACCTTACTACTATCCTCCCTTCAGTTCCCTTTTTCTGCCTTTTTCGGTGACGGAAA  
TACGCTTCAGAGACCCTAAAGGGAAATCCATGCCATAACAGGAAAGTAACATCCCAATGCGGACTATACC  
ACCCACACACTCCTACCAATAACGGTAACTATTCTATGTTTTCTTACTCCTATGTCTATTTCATCTTC  
ATCTGACTACCTAATACTATGCAAAAATGTAAAATCATCACACAAAACATAAACAATCAAATCAGCCAT  
TTCCGCACCTTTTCTCTGT

>Positive Sample 290

GAAGTGAATCGCTTGAAACTGGACGACTTCCAGATCGGTGTTTATATGGAATTGGTGAAGGTTTTGTTTCG  
GCTAACCCAAACTTATATAATCATTATAAACATTTTATAAACTTATACACTTTTTTAATAATCTCACCAT  
GTTTTTCTTATGTGTTTTGTTTGACAATGACATTACTCCCTACAAACATGTGCGCGTTTGTGACAAAAAC  
ATAAATAAAACAAAATAATAAAAAGTCAAGTGAAAAGCACTGAAATCTAAAAAATAAATACATATACAT  
ATATATATATATACCTAT

>Positive Sample 291

TATGATTTGGCGAGTAGTGTTAGTACGTTAAATGCTACGACTCGGCATATACTGTGCTCGTTTTTATCAG  
TTTCATCCGAGGATTGTAGCCTTTTTTTTTTCATTTGTTGATGTTTCTCTAGTATTTCCGTCTTGTAGTG  
GTTTCGGGTATGTTGAACATAAACATTA AAAAAGACGATTAATAAACTTGAGTTTGTACAAAGGAAAGC  
TG TAGTCATAGAGTATTTAGAAAAAAAAGCAGCCACAGTTTACATGAAGATGTGACCAATGAGGAGGCAT  
CGTTTTGCCTTTGAATCTCA

>Positive Sample 292

AAGAACTATTTGCCGTTGTCAAAATATATCGCATTGAGTTCAATTCGCGAGTACGAAAGAGACAATTCTA  
CGGTGAATTCGCCAATGAGGAAGAGTCGTATGCATACCCTTACGCTGTGAGTGAATTAGAGGGTCCGAT  
GTTGGATTGAAATCCCAAGGTGCTATTTCTATATTTATATATTTTGTGTGAAAATGCCAAAATAAGATT  
TTTGATAACAAGTAATACTGGATATTTTTTATTTGCTTATAACAATAAATAAGTTCCTGACTTCTGTAGT  
AGTAGTATAAACTCCTGATG

>Positive Sample 293

TCTGTATAGCTGTTTCCAAATCCAAATTCGGCACCATAGGAAAGTCGCAATTGTTGCACGTATATGTCCC  
TTGGATATTCCAATTA AATTTGCGAGGATTGTTCTTTTCGGCCGTTTCGTGGTTTGTGTAGCCCTTATTAT  
CCCTCTTTTTCATCCTTAATTGCAAATTTATGTATGAAAACCTTTCATTTCTAATGTTATTAATTTCCCG  
ATTCTGCAAATAATTGATAAATAATTGATACTTGCCGTCACAGATGATATAGAGAACGTTTCAGTTTTT  
TTATTGTTCTATTGTA AAAA

>Positive Sample 294

TGAAGTTTCCAATTTTATATGTATACATTATTTATTTGTCTATCATTAAAATTTCTGTCAAGTAATGG  
CTTTTTATGTTTATTTTCATGGATTACGAAATTTGCTGGCTTTTTAGAGTGACCGATGAGTTGCATGTACA  
TATGTGCGAAATAAAAACAATACGGTAGTAAAACATGAATACTTCGAGAAGTAAATTCAGATTGCAGGCC  
TAGCACAGAATGTCCTTCCGCCTGCTAGTGTGTTGAGCAAAGCACGCCATCACTAATGGAACCTTACA  
AAATCTCGCATGGAGCAGCA

>Positive Sample 295

ATTGTTACTGCTGCTTCCTTTACCTTTCTTTTTTTTTGGTCAGTGACAGGTTATTTTCTTTGTTTACTAAA  
TGGTCGCAAGATTTTCGCGATGCGTTAATTTTCATATTATGCTTTCCAATTTACCCAAAGTGCAATTG  
ACAAAGGCCATTAGTCTTTCTTTTTACAACAGTAAGAATATAAATATACAAGTGCAGTATTTAAGATACT  
TAATTCGAAAAGTGAAAAAAGAAATCTGGAATTGGTTATTTAATTTCTCATATGAATTGCTT  
TCCAATTTCTGCAATCAAT

>Positive Sample 296

AACCAATGTGGCACAATTTCTAACTAAGTCGCCCTCAGTCCGCTCATTTTAGCTGAATTTTCTAATGTTA  
TTTTTCATCAGCAAAACTTAACAGAACGTTAATTTATCTACCCCTTTTAGTTTATTATCTCTTTTTTATC  
CAACATTTTACAGAGATCTCTCACTTAAGTCTAAGTAAAGACATTATTTTATATGGTACACTTATAGAAT  
ATACGATAATAATAAAAACTATGTAACATAACCTTCAGAATTTAATATTAGTTTCCTTTTTACCTCA  
TTGCACTAATAAAAAAATTC

>Positive Sample 297

GGTAACATCTTGCTACCGCCATCTTCTGTTAGTTTACGCCTTATGACCAACATTCCTTATATTCTCGTTC  
AACTTTTGTCTCGATATTTTGCAGGTACCTGTAGAACTTAATGTGTTCTATTCAAATAAGTATAAAAT  
TTCTGGCCAGTAAAGGCAAACAAAACATAAAGATATTAATACGAAAAATTTCTTGAAGAAAACAAAAAAT  
ACTTCTTATAATAAAGAAACAGCGAAGCCATGGCTATTGACAAGATAATCAGGAAGGTGAGATACCTGG  
ATAGAAGACTAAGAGAGAGC

>Positive Sample 298

GAGGTATAGTTCGACAGAAGAGTTCTATTAAGTTTTCTGTTATTTTCAATTTGGAATATAACCCAAGTTG  
CTTTTCTTTGATCATAATTATTTCCACCTCTTTAATGGTTTGTATTATTGGTTGATTATTTTACGCCCTTCT  
TTTAGGTTCTTCGCATTACATTAACCCCGTAACTAACTTAACTTTAAAAAATAATGGACAAC  
TCAGGAGATAGATAATAAAGCATCTTTAAATTTGAGCAATGCTTTGCTTATTAACCAGCAAATGAAG  
ACTATGAATTCTAATTGCTA

>Positive Sample 299

TATATGGCTATTTAATGGCTTGCACCTGCGTAGAGTTACCAAATCTAAATTTACAAGAGACAAATTAGT  
TGAAATTTTATTTCAGCCCTTTCTGTAATACTGTAGAGTTACTGAACATTCCTTTAACTAGCTAATATACT  
GGAGTTGCATCGTTGATGTGTATTATCTATATTCAAATAGTTATTTTTATGTTTAAAGAAAGGATTAAGA  
ACAATTTGAAAAAATTACCATTAGCAACGAATATTAATTTGTAATTTATTAGAGATATTTTTCTATAA  
TATGCTCGCTACCATTCTC

>Positive Sample 300

TGGTGTTAGTATCCACAGAATGAGAGACCCTGAGAGACAGAATAATCCAATTTTTATAATTAATGTTTC  
TTCATGTAATTTTCAAATATTGTGTAATCGTCTATTTGAATTCGTTTTACGGCAGCATATTTGAAAA  
AAAAATTAATTTTTACATCTAAACATAAAAAACCTAATCGTTTTCTTTCCATGCTGTTATAGAGACATTT  
ATTAGTACGAATTTTTCTTTCTTTACGAGCACTATAGACAGTAATTTATATAACTAAGAAAATGGTAT  
GCTCAAAAATCAACAATATG

>Positive Sample 301

CTTTAATCTTCTTATTTCATGCTCTAAATCTTAAATAAAAGGTTCCGTTTTTTATCTGCAATTCTGTGTA  
TTTGTAAGTGAATTACCATGCACGTTGTGCGATCGTTTTCTAGGCAGAACTATCTTATTGAACCATTA  
AAAGATTACTTAAATATTACAATTAATCTTACGAAGCATATTAATTAGACTGGAATTACAGCGCAACTAT  
CACAGGTTAATAATTGGTTGAGAAAATATTATAGTTTTGTTAGTAATGTTGAACTTTTTATTTTATACT  
TATGAAAGTAAATTAATTCA

>Positive Sample 302

TAATGGATCAGCCAGGGTACAGTGAGTTATGATAAAGAGAGTGATGATCGCAAATGCTGCTTGTAGAAA  
GACAAAAATGAATAGAGGAAAGCCGAGAGGTTTGTTCAAAAATTGACGCCTTCCTCATTTTTTTTCATAA  
TTAGCTGGTAAAAGTTACTATTTGTAACGACTGCTAAATAACAAATAATTATTCGTGTAATAAATAATAG  
CTAATACCACCAGGTGTTTCATATTCATGACTGCATATTTGGGAAACGAGACGGTTTGAACATCCTTAGT  
TGATGTAAAACATAATAAA

>Positive Sample 303

CATCGCTACGTGAAGATTTTTACTTTTCTTCAACATGTGTATTTTTTATGTTTCATATTTTTATATTTTG  
TGTTTGCTAAGGTCTAATCGTTCAGCTAAGTTAAAGCTAAGTATAAGAAGCAAAAAATACTAAATTATAC  
TAAATTATAAATTTTCGTACATAAATAATCATGAGGTAGATGTTTAAATATGTAAATAGTTTCTTTTTTC

TTCTTTGTGATTGTCAAATTTGTGTCTATCTATAACAACCTCTAGAGGTATATCTTAACTGTGTATTAT  
CATCAAATTCGTTATTATTA

>Positive Sample 304

TTATGTTTTCTCGTTTCTTTTCTTTTTTTGTTTTATATCTTACACATTTTTAATATACTAAAAGTAAAA  
TAAAAAATACGTACTGTTTCCCTTTGTTTTCTCCTCCTCTTTGCTTATATCTCCACTGCGCCATCGTCA  
TCTTCAGAGGGCGTGCTGATTAGAGTCACTGTGTCTCCTCTGATGAACACCATTTACATCGTCTTTCGG  
ACTCACTCAACTCCTCGTTGTTAATTGGTATATGGTCTCTACTGCATCACTCAGCACGATGTTGCAGTG  
TGAGTCGAACGCTTGCAGTG

>Positive Sample 305

ATTCTTTCACCCATCATTCAAATGCATATGCATACTATATTTGTCTAGTTTTTAATTATATAATAATA  
TAACAGAAACAAAAATCGCATTTCATCGTTTAACTTATTTTTCTTTTTTTCACCTTTTTCTTGTGAAATT  
GCCAAGCGCTTAAAAAATCGTTATTTTCAAGAACTAAACATCATTAAGCAACGAAGAAGAGAAAAGCGGAAC  
TATAACCATGAGTGATACTACGGAAGTCCCTAGGCAATCATCTGAGAACGACCAGGATAATAACTTGGAA  
AGAACCAACTCATTA AAAAG

>Positive Sample 306

GAAATGGGTGCATAAATTTATGTGCTTGGTACATATGAGTTCAATAGATATGTAGTAGTTGGATAGTAGA  
TAGTTAGGATATATAATCATGGAAGGGTTACTCACAACGAATCACATAATGAGTTATGATTTTCACTGTG  
CTCATCTGTTGCCCTACAAGGGGTGATCAATAACAAACAATTTTCAAAAAAAAAAAAAAAAAACTAAGT  
CACTATAACTAAACGTAATAACTATGTATATGAAAGAAAATAATATCTGTTTCGTCTAGTTTAATACG  
GCAACGAGTTTTTACCAGA

>Positive Sample 307

CGGATTCTCTGTATTCTGTCTATAGTATTTATATACCAATACATTTTTCCGCACTTTGAAGTTTTGCATT  
TACTTAAATGTAGTTTATTATTAGTTGCCAAAACGAAACATTTAACATGTGAATTA AAAATACAAAAAA  
AGCCTATTAACGATCTAAATTTATGACAAAAGACATATAATTTTAAATGATGCCTTTGTCACAACCGA  
ACACAATATCTTTGAAAAGTGATCCAGCAATCGAATTCAGAATTCGTTGTGCCATTTTTGCCTTACGTT  
GCGCCATTGTAATTTCTCTG

>Positive Sample 308

ACATGCAACTAGTAATAGTACAATTTTTAGTACCCTTTAATCTTTATTGTTTCGCTCCCTAATAACGAAGC  
CTTGAAGTGAACAGATCCCAGGTTACCCCTTATCCTTAAGAGGTCTTTTTATTACTCTACATAATATA  
TATTTTTCAATCCATTGAAGAGGATTA AAAAGAAGAAAAATCAATACCGAACAAAAAACAACGAAATA  
AAACAAAACA AAAAATTAATTAATTAATTAATTAATTAATGTCATCATGATTCTTACTCTGATTGTCT  
TCTCTTCTCTTTCCCTTG

>Positive Sample 309

AACCACTGGGTTCTATGAAAGTTGATATCCGGTTGATGTGAAAAAGTTACAAATTTAGACCATAACAAC  
ACTAACAGTAATCTCGCAGTTTTACAAATAATTGATAAAAGCAGGACTATTTTTTAACCATTTAATATAC  
CTATTACTATTAATATCATTAAATATTATATATGACAGTCACTTATTTCTTTTTTTTTTTTTCTTT  
CTTTCTTTTCGTTCTATTTCCCTTAGTATATACGAATTCGTGCACATCACAGCAAAATATATGGCTATCAC  
ATGGCACAGGTATTACTAAA

>Positive Sample 310

GGTTAAACGAACTTTTCACGATCATTCAAGAATCATTGAAGATTAATTTTACCATTTTAAAATTTTAA  
TTTTCTTGGGTATGAACTTTTATTTTCAACTGCTTATTATATATCAATTTCTATAAATTTTTTCTTCTCT  
CTAACGACCAATTATAAAATTCATCCTCTTATTTATTACAGCATCTTATACATTATGTATATGGGTAGCT  
ATTATTCATTTTTGCTTCGTAAGGTCTTTTTTTGTCAACTTTTTTCATCCTAAGCGGCTAAAAGTGATTGG  
AGAGGAATGTCCAGGCGACC

>Positive Sample 311

CGTTGTCATTGAGTGAAATCAATTGAAAGTATGTACATTTGGAAGAGCATATGTTAAATATTTTATTTAT  
AGATTTTTCGTTGTGAAATATTTTTTTTTTTTTTTGAAAAAATGTCGGACTTTATTCCTCCTAATTAT  
TAATAAAATACGAATATATATCTAAATATAATTAATGCTTATTTACATGAAAAATCATCAATCGTAAACA  
GTTGATTA AAAACA AAAAATTTATCGGTTCCATTACCTTTGTGAAACCCATTACTCCACCCCACTCCT  
TTGCATAATTCAAAACCAT

>Positive Sample 312

TGAAATTGGTTTTGTTTTGCAAAATATTTATGTTTTGTTAATCTCCTCTACCCTTTCAATGCTTGAAAA  
TACTTTCAACTTTTCGATTGGGTGATGAAAAAAGACAAATAGTGAAAGGGTTCAAAAATAAATAACAA  
GCAAGAGAAAGGGACTTTGCTTTTCTCATTTAGTCACCAGTAAGTTATGTCATGGTGTAGAATAACGAAT  
TACAGAAAATAATAACTGATGAAAGACCAGGGAGTAAAATGGCTTTGACTCAGTTTGAAAATGATTT  
GGAAATATTAAGAGATATGT

>Positive Sample 313

TGTCAACAAGAGTGTCAAGACCGGCTACTTATCCCCAAGGATCACGTTCCCTTCTGCCAACATCATTGCC  
GTCGAACGTCGCGGCGGTCTTTCTGACATTGGTAAGAATACTTCCAATAAGAGCATGCTTCTCTTTTTT  
TTTGTAGGCCAATGATAGGAAAGAACAATAGATTATAAATACGTCAGAATATAGTAGATATGTTTTTATG  
TTTAGACCTCGTACATAGGAATAATTGACGTTTTTTTTTTGGCCAACATTTGAAATTTTTTTTTTTGTTACCT  
CGCGCTGAGCCCAAACGGGC

>Positive Sample 314

AAAGACTATTAATGATTGTTTCTATCGTCAGGATATTTGAAAACGTCCAAATATGTAAAACAACCTTCTA  
AACATTAATATTTTTGGTGAATTAATAAAAAAATATGCGCAAGCCCGGAATCGAACCAGGGGGCCCAACGA  
TGGCAACGTTGGATTTTACCCTAAACCCTTTCGCGCATCTTTATTGGTATTTGTTGGAACATAGAGTTA  
ACTAACCATATATAACAACCTTCTTAAATGCACAGTACAGTCTATTCAAAACTGTAGCTATGCGCTGCATC  
TTGTGGCAAACCTCGAATGGA

>Positive Sample 315

AAGCTGAGTGGTACTAATGCACCGAGATGCAAAGTCCGAACCACCCCAACCCCTCTTTACCTATTTTT  
TATATTTTGTGATAAAGGGATAACTCGTCTTGCCTTCACTGCGCTTCGATTCTACTTTAGCTAAACTAAG  
CGTTACTTTGTTTGAGAATCTCTCAGCCGTTAAATCAACGTACTTGTATACTAAACAGTATATTCACGTG  
ATAACTTTGCCTTACACCTATGATATAGATAAATATATACATATATATGAGTGTGTGTGCATTGCGTCAC  
TAAACTATGTTTAATATGAC

>Positive Sample 316

GGTATTCGTATCGCTTGTATACAATGATAATCGAGGTAAAACCTCATGTACAGTAGTGCGGCATATTTTC  
TTATTTAGTTTTTGTAGGCGGCATAGTACTTGCAGATTTTTTTAAAGTCCCTGAGCCCCAAAGTTCC  
AAAGCAACAAAAAACATAAATCCTTTGCAGGAAAAGTAACATTTGGCAAATTTCAACAAATTATGCC  
CCCGAATTTAGCAGTGATCAATGTTAATTTGCCTACATGCTGATGCAGAGTTGTAGAAACAAAGAATTT  
ACCCTGTATGAAAAATTTTC

>Positive Sample 317

ATATTGGTAGCAATCCTTGGTGACGCTGACTTTTTTTTTTTGTAATTTTATTGTTTAGTTCATGATAAAA  
AACTTCAAATCACTTTTAATCTGGTAGACAGAGAAAACAAATCGAAACGAAAATAGAGAACTACGAATAA  
AAAAATATAAGTGGAGAAGATCGTCACTACGCATTAACAATATTGATCGCTCAATGCCAGTACTGCGCG  
TAAAAGTTTAGTAACTTAACGATTTAGGCACAATTTGAGAAAAATTTGCGCCTGCAGTAAGTATGTTATT  
CAGTACGATATAAAGCTGAG

>Positive Sample 318

CGGAGCGACAATTTTGTATCATAATGTCATATTATAATGTGATACATCGTCTGAAGAAGAGAATGCTTT  
CGAAAAATTCACCTAACGCTATGATCGAGGTTTGCTAACTCAGGGTAAATAAATATTACATTTGTGATA  
TTTCGGCGGTTGTGCCTCTTTTACTACTTTACAATTAGTTACAATTTCTTTTTCTTGAGTACTTTTCT  
CAAAAAGAAAAAAGAAAGAAAGGCAAACCTAACTAACTTATGATAATATAGAAATATTCAAAGCTA  
AATAAAGTAATTTCTGGTCT

>Positive Sample 319

CGATGACCTAGGTTTAAACAAGATCATGAAATATTCATTAACGGAGTTTTTTGTTTTTCGCTTTTTTTATTT  
TTTGTTCCTAATTTTTTTTTTTTTTACATTTTATTAGCTATACACTTGGCGCAAGGATATTTTATATAACC  
GGATATAATAGATAATTAAGACTACTAATTAATAAATGATGTAATATGGTAATAGGTATGGAAGAATCA  
GGGAGTTTTCAGAATGTTCTTTGCCCTCTTTGGGCTTTCTAGTTTTGCACTTTTACTTATTCATCTCCT  
GTAACCGAAACTGAAATGGG

>Positive Sample 320

AACAATGGAGTTCACAATTATCAAAATATTCGCACAATATTCACGTAGAATAGTGGATGACAGAGTATAT  
AAACAAAGAAAGAAGCACTCAGGATTTTCTATAAATAGTGAAGTTTTCTATGGACGCCAAAAAATCTTAA  
GGGTATCTTGAGTGAATCATCATTGGAAGGATTATTATCTTTACAGAGTAAAATACTATTAATAACTAG

TAATTTCCGTGAAGTCATTAATAATGAACAAAACGATAAAACGGTTTCTTATTGCTAATGTGCTGATTTTT  
TGCCAAAAGGTAAAATCTAA

>Positive Sample 321

TGAGCCTTATAATTCTATTCGCTTACTTTCTAAATTTTAAGTATAAGGCAGTCCTCTGGTCTACAGAGTT  
GTTTTGTTTTTTTATCCAAGTTCTTTGTTTCAATCTTATTGTAGTTTTTTTTCCATTAATAATTAAGCC  
TAGGATAATCTATATCCTAAACTAAATATAAATTAAGAGTATAAAAGATGAAAGTAAATAGCATCTAGCA  
TTCAGAAAAATAAGAAGTCTCTTTTCAAATGATTGATCGAGCACAACGAATGTTTTCAAACCACTGTTA  
ATTTTTTTATAGATGTAATG

>Positive Sample 322

AAAGATACTAGATAATGTTTGTCTTGATGGCAAGAAATACACAATGTCAACACCCGCGCTTTCTCTTCG  
ATTCATTAGTTGATATCATTAAACATTATATTATACATACTTTATTTCTCTTGAAATTAATAATTTGATG  
ATGGTTTATCTAAATATTGTCTCACTCATTTTCCCTTTTTTTTTAAGATAGAATATCAGTTTGAGGCAACA  
AATGATAAATTATGATTATGTATATAAAACAATTTTAATTTTATTAGCATAAAAAAGGGACAAGGCCTCT  
GCTAAAATATCGATAAAAAA

>Positive Sample 323

GCAATTAACCAAGTCCTTTTATTTTTTTAATGGTTTATTTATGAATTGTTTATGTTTATGTTCTTTATAC  
TCAAAATCAATAAGTGCTTATTTTAGCGAATTTCTTCTACGAATATATATAAGTCATATCTAAGACTTC  
CATCCGTGCTTTATTACGTTTGTATGATGCATACAATGATGCCAATCAGCTTGATGCTGTTGGTATTCA  
GTCGTCCGAAAGCCTGTTGATGTGACACTCAAATCTTCGGCATGTGTGAACGGTGGCCGAGCATAGTTCCG  
TGAACATCATCACTTAAAT

>Positive Sample 324

TTTCGCCTTCATGTTTTATATATTATATAAATTTGTTTACTTATTTTTACTATTTGTAATAATGATTCTG  
CTTTACGCGCTTTAAAAAAGTTGGTCTTAATGTAAACATGAACCATAGCACACAATTTAAGACATCAGC  
TGTCAAATGACCATAAAATTGCTTACCAGCTGTCCTTAAAGTTTAGTGTACACTTACGAATGACTTATT  
TACTCACCTTTGCAACTTTGTTCAATAAATTCATTGATCTTTTCAAGTTCCTGACATCTTTTGTAAGTGG  
CATAGAGCTTCAGACTTGAC

>Positive Sample 325

CCCTTGAATGATACATGACTAAATATAATGATAAATTTATTTCTTGATTTTTGATTATTTTCATATTTTGT  
TGACATTTGAGAGCTTCAATTGTATAAAGTTGCAAGATAATATATGAGGTTAGGGAAGCCGGATAAAGAA  
AATAGAGTACTTTAAACTGTTTCAATGGACTAAGAATTCAGTGACGATGAAGTAGTAAAGGAGAGTGTTTA  
GGATATAAATAAGACCGAGAAATTTGTTAGTAAGCATTACTTCTAGCAGAAATAATGAACCACAATCGTGA  
CAATATATACTCGAGTTAGC

>Positive Sample 326

GACGAAATTACTGTAAAGGGCTTAAAACCTGACTTGGAAAATGTTCAACTCCCAGATCCTAATTGCGAAC  
CCATAGCCACAACCTTTTCGCGCGAATTAGTTTGTAAATAAGTCAACTTTTTAGATGTGTAACCTGATAAT  
TTTTTTTTTTGATGTTTCGACATCATTATTTCTGAATGAAAACGTGAAAAGCTTCGCCAACTTAAAATGG  
AAAATTTGCAATGGAACAAAATATAATCGATGCGATGAATTTAAAACCTTGGAGAAGAGGGTTAATTGTT  
AAAATTACATATATAATTGG

>Positive Sample 327

CTAAAGGCAAGAGAGAACTGAATCCGCTAGACGTTATTACCACAACGGTCACCGAGACCAAGTACAAGAC  
AGTCACCGTCACTGCCAAAACCTTAGCGCGGTTTTTTCTACCTTCCCTTTTTTTCATCTTTTTGTTATATAT  
ATATACAGAGACACTCATGCAATTTTCGCAAAACGAAGAAAAAACATAAAATTTTCGTTTGTATCTAC  
ATGACTATCCTTTAATTATTACCTTTCTGTCAAATGTTTTATGGGAATATATATGTTAATATGAGCCAAT  
AACTCACTAAAACCTCACTG

>Positive Sample 328

GTTTAGTTAGGTTATGTGAAGGCACGGGTTTTGTCTTTTTTTTTTTTTTTTTTTTTTTTACTATTACTTTCTTTT  
TCAAGCTTTTAAAGCGCCGAAATGATATTTAAGGGAAGATGACTAAAGGGACAGCGACGAGGATTCAGCCT  
GGACAGTGATAGAAAAGTTATGCGGGAATACGTATATATAGTTGTATAAATTGTGGTTATAGAACATCGC  
AGCGCCTTTAAATATATTGTCTTTTATTTCAAATCTTATCCATCTCTCTTGTCAACCAGGCAAAGCTG  
GAGCTATGCTGAAAAATCA

>Positive Sample 329

TGTATCCGTAAAAGACATTCTTAAAAGTTTGAATTTATGATCTTTTTATTTTTGTATTTAGTCTTTGTTT  
TCGAACTTTTATTAATATTAATTTTCAGTAAGTAAATTAAGAACATCTTTAAAAGAGTATATTTATTG  
TTACATATGTTGATCTTAAAAGGAGATGAATATTTCTTAATGGAAAAAGGTAAAAAAGATTTTCTCAT  
TCATATGTTCCCATTAGGCAGTTCTATGAGGCAGTCGTCCAACCTCGTAATCAGAGATCTCATTCTCATCC  
TCTAAGTAGCCCTTTACCTG

>Positive Sample 330

GTCAGTAGTCAAAGCATCAATTTATTTTCGTTTTATTTTTCTTGACAAAGAAAATTCTATGTTTTGTTCC  
GAAATCTCGATATTTTAGTAACCTAAAATAAAGGTAATAAAATCATCAAAGGTTTTCCATCCAGTGGTCC  
AAAAAAAAAAAAATACAGAAGCAACAAAAGAGCACCAGAAAATGCATTTAAAAGAATTTTATTAATAAT  
AGGGAATACAAAGGACGCGATAAATACCTTCATCTATAAGCAAACCATACATATATCTATATCTATAAGA  
AAAGTAACGAGAATTTTTTC

>Positive Sample 331

TGTGCTGTTGATTGTGGATTCATTCTGAGACAATAATTTGTCCAGGCATTACAATTATCCATTAATACA  
TACAATCTTTTATCTTCTTTTCTTTTTGTACAAGTTGCGGATTACTTCTCTTTGTTTACCTTTTTGCTT  
TTATTTTTTTTTTAATACGTGCATATATATATATATATTTAGTTTAGGTCAGAATACAAAGATAATTAT  
GTATAAATGGGCGCATTTGGAACTATTTTACATACAACCTGAACAAGTTCGGAACAATCTATCAATAATC  
TGCACAATTATATAATCCGA

>Positive Sample 332

TCATCCGGATAGATTGAGATCGCATTCTTCTATGATAGACCAATGATCATTAAAAACTGATACGTCTTA  
CGACTATGTTTAGCTTTGATGTTTTCTCCATTTTTTTTTATGTTTTTTTATGATAATCTCTCAGCCGCCAT  
CACTTCCACACAGGCAATGCTCTACAGTTTTATTTTGTCTTTTAGGTAATGCCGCATATATATATATAT  
AAGTTAGAACACAACTATAGAGCAGCGAGGACCCGTAGCTAAAAGGAAGACAAATTGAAAAATCTTTCA  
CAAATGAGTATAGAATATAT

>Positive Sample 333

ATTAGCAAGGTGTCGAATCAAGTTATACTAGATAGGAGGATTTTATAATGAATAATGCTTTAAAATGGTT  
CTCACCTTTATTTTATCATTCTTCTTTTCTTCTGCTATTGATTTGGTAGTGTTCGGGTTAATTCATT  
TTTTGTTCAATAACAAGAACCAACATAAAAAAAAAATACTTTAAGAATAACAAGACTGATGAAGCATAG  
ATCATATTATTAGAGCGCGTAAGGTATGTAGAGCACAGATTGGTCCTTCGAGTGTGATTATATAATTTTA  
TATACGCTCCTTAATTTAAA

>Positive Sample 334

CATTAGACAAAATTGGAAAAGTTAGATAATTAGCGTAAAAGCCTTCATTAATGATAATAGCGTGGGAGGT  
ATAAGATGCGCTTAATAACGCTGAAGAATATAAAGTTTCTTATACATTCAATGAAACAAGGAAATTTTCA  
ATTTTAAATTTAAGTTGAAATAGCCTTTAGCACCTAAAATAAAAAAATATTAACACCAACATGTTGT  
TGAACAAGTTTTCCAGAGAATTGACCGAATATTTAAATTTCTATTTAAGAGTCATATAAATTTATTGAAA  
ATCAAGTTGTATATCTTTAG

>Positive Sample 335

ACGCCAATGTCATTATATGTACCAATATAGACGCATTATACAATCCTACAATTTATATCATTGTAAAATT  
ATTTACTACCACTTATTCTTCAATGGTGTTTTTAATGTTTTGTAGAGGAAAACCTAAAAGTTGTCATTTT  
TATTCAGATCGCAATCCATGGTTTGACACATTCTATCTTAAAAAACAATAATCTATTTATTTTGGTTTCG  
GCTATATTGATGATGATGAATGTACATATAAATGGCAAAATTTAAATAAATAAATTTTAAAATCAAT  
TTTGTGTTGAGTTAAACGATA

>Positive Sample 336

CTCATCCAATCAATCATGTATTTACATGCCTGGAGTGGCCTATTCTATGTATTAACAGCCTTTGCAAGAC  
GCGACATTGTTCTTTCCGATATGGCTCGGAGTAGACTAAATATGCTACTTATAGTTTTTCTTGCATATA  
CATTGTCTTATAGTTTTTGCACACATTAATGTTTAAAATTGAACTACGAAGCAAAACAATAAAAAAAC  
AAACAAAACCTAAAATAAACAAGACGCTCGAAACCAAGTGCATTTATTGAATGTTTTTGGGAATGCA  
AGTAGCAATACTATTGTAAA

>Positive Sample 337

GTTCTTTGGAAGCGAGTGCAGCCGATGAAAGCGATGAAGATGAAGAGGCCATCCGCCTTTTTGGCAAAAA  
GTCTAGAGTTGTTTTGAGCCAAGGTGATAGTGATGATTGAGAATGAATATGTAGTAATTAATCCCTTTAA  
TACGTGTAATTTAGAACCACTTCTTTACTCTGTTTTTAAGTTCAAAGTATTGACATAATATTAACAACAA



TACATGCGATTTCATTCTTTATCATTACCTATATTTTTCTAAGTTGTTGAACATCTTAAGGAACTCAAATG  
TCCATTAGGACACATAAAAT

>Positive Sample 338

TTCGATAGATAGCCAAATGCAGTTTATATATATGTATGTAGACTTGAAGGTATATTAACAGTGCCCATGT  
TTCTTTGGAAAGTGTCAAATATCGCAAAGCATAACCTTGAAGGTTAACATTATTTTCTAGAAATACACCT  
TTCCCACTGGATATGATGACGGAAGAAACAAAACGTTAAATTATTGTACCGTTGTATAAAACAGTAACCG  
AGCATGGACAATTCATTTTTACACCCCAACGACGCCACTAACCATGTATAGGTGTCTTGCCTAACTTATC  
ATTATTCATAGTAGAATTA

>Positive Sample 339

ACGAGCAAATCAATGATAAGTACAAGTCCAATCGGACTGATTTCGTA AAAATTTTTGCAGACATTTTTGAT  
ATATATTCAATTCATATTTTTATCTCTTTTTTTTTTTTTTTTTTTTTCAGACGTGGAATGGTGGGAAAGCCAAA  
ATGTCACTGACCGCGGCTAAAAGTTAAAAAATACATGAGACGACATTCTTTTATGTATATATATTTACAC  
ATGTATACAAACAAATACACACGCAAGTAGAGAGGAGTTGGTGGGGGGAAGATGCCATTATAGAGGAGAA  
AAGAACAAAGAGAGTGAGCT

>Positive Sample 340

CCTGGACTACTCAGTAACTTGTAGTAAAACCATTTCTTATACTTCTTGGAGGCATGCTTAAACTGATGT  
GATAAACATATTCTTGTGGTAAACAGAGTTCGTTCAATCTTTTTAAGATATTTTGTTCCTAATTTCT  
TCACATTTTTGAATTACTGTTTTTCTTAATTTACATAACGGGTTCTTTTCAAAAAACCGTAAAAATTTGAG  
GTCACACCAACTAAATACAAATTGTTTCATCACGGTGACTATATCAAGAACTTCGTAAGGAAACATTTAG  
AAAACCTCAATATAGTAAAGT

>Positive Sample 341

AAAGGTTACATTTTCGCTAAGTAGATTGATTACCCCTTTGTTATAAATAAGTATATGTGTTTACTATCATA  
TAATAATTAATTAGTTGTAAGTATGGTATTTTTCAAAGAAACATTTAGTATTATTTTTAAAGGGTGCCTT  
TACCATAAAACCAAAAAAAAAATGGCTTCTGAGAGAAAAACATAAATAATTGATAAAACTGAAACTCACAA  
CACCAACTCTCCGCTCTAAACACCCAAAGCTCAAAAAACGACATGTGCACATCTATATCCATAAACTTT  
CAAAAAAGTGGTTCATTTCGC

>Positive Sample 342

TGTTATTGTTCCGTTTCATGTTATTACAATATAATTGACTATCTGAACATTTTGTCTTCATTTTTTTTTT  
TTTTTATTATCGTTTTGTTTACGTTTAGGGCGAAATACTCACCTCTTACTATTAATAAATAATAGAATTTAT  
CAGAAAAAAGTCAGCAACATCAAAAATAACAGATGGATGGCTCTAGGATAAAGGATTCTTATTCTCTTA  
CGATTGTCTATGTTCTTTTGGTATTTATTTAACTTTATATATCTGTCTTAATTTATAAATATTTATAAC  
AACCTTGGCGTAATGTAAT

>Positive Sample 343

CGCCTGTGTTATCGCTTAATTTTTGACGACAACCAAGAGGTCAAATCAATATCTACCCCTTTCATTTATTA  
CGTGTGCTGGCAAATAATTTATTCCAATTCTCTCATATTAGCTCACCCCTTTCATACTTTTTTCATAC  
TTTTATACATATGATTTGTAGTTATCACTTTAACAGATTTTTTTCATGTTTTTCTTTTCTGATACGCCTT  
TCCCTCCGACGAAATGAAAGATGAACCACCCATTACATTCGATTTTTTTTTTTAATTATATTTTTGACTA  
TTATTTAATCATTA AAAACA

>Positive Sample 344

CATCAAGGTTGACCAATACGATTGCTGATTTCGACAACCTTCTACATTACATAGGCATATACATATCAGAAA  
AACGTGCTTTATAGGTACATTTTTTAATTCCTTAAACATAACTTGCTTCTATTTGGGATAGTTCCTTTT  
CTTTGAACTACGTTTTTTGGGCAGAAATATAAAAAAAAACCGAAAAAACGGCACGCAAGAAAGCTTATT  
CAAAAAGACGCAACAATATCATAGATTATTCTAAGTACCAACAACGTGATAAACTTTGTTCTAATAAAGC  
TACATCTTATCTCTCTGTA

>Positive Sample 345

GCAGAATTAGGGAGAAGTATTCAAATAAATACACTGTTATTTATATACATCGGGAGGGAGTTTAAAAAT  
TGTATACACTAAAGTGACCTTATGAATTGGAGCCATTTTCAACGTTTTAGAGTGATGTTGCATCCTTTTC  
ATCAGATCGGGAAATTA AAAAACGTTATAGAAGGGCTAAATGTAAATATGTAAATTTTATGAAGTCAA  
GAGTAAAGAAAATCTTCGGTTGCCGATCAAATACACTCTTACAAAATACCTAAACTCAGTTTATCTTTC  
CATTCCAACCTGATTATCGCG

>Positive Sample 346

TTTTTACTTTCTGCTATTGGACCCTTTTGGACCAGCCGAAGGAAGTTTTTTTTCTTTATGTTTAGCTCTT  
TTTTCATCACTTCTAATTCGCAAATAGAAGGGGAAGGAGGACAGCAATTATGTAAAAATTAATTAGTATG  
TCAGTAACAAAAAGAAGAGATAACAGAGGTAGTTCCTCTAGACATTTTTTAAGACGACTATTGATGCCAGG  
CAAATTTTGGATTTACTGCTCCTCTTTTAAGAAGACAAGTGTGTGATATCGTAGCGGTAGGAACCAATTT  
TGCAATCGATTTACTTACAG

>Positive Sample 347

CTTTCTCCGTCAACATTAGTATTTAATTGTATACAGACACCATTTCATAATTGCAGTTAGCTTCTCTGTTC  
TTTCTCATTCTAGGATTTACAATGCAGTCTTACCTTATTTGTTTATGTTTTTTTTCGTTTATCAAGCGTG  
CAATCAATTACTGAAGATTCACGTGCCAAAACGTAATAATAATAACATAACCCGAGAGAGGCAAGAT  
TAGAATCAATTCATCTTTTCAAACAATGGTTATATCGACTAAGCGAAGTGATTAGATGGTGTACGTTCG  
AGATATTCAACAGTGACGAA

>Positive Sample 348

GGCTTCACAGGAATAAACTCCTATAATTTAAAGGAAGTTGTTAGTGTAGCACTATAAGTAAGAAAAAGT  
AAATTCTGGCAGTGTGCTTTTAATCGCAATAATTTGATTTACATTCAAACAGTTTCATATACCTCTT  
TGATAGAACATATTTGCATATGTGTTTATTTGTTTTTTTTTATTGTTTCTTTTCAAATA  
AATGTGAACAAAGAAGAAAAAGGAGTATAAAAGAATAATAATAGCGGTATTACGTGTGTTGGAAAAAGA  
ATCATAGATCGTCAATGGAC

>Positive Sample 349

CGAGTACATCTCTTTTCAGTGAGTAACTTATATATTTTTGAAGTTAACATCCTTATTCTTTTTTATATTT  
TTATTTTTTTTTATGTTTATTTTCTATTACTGATTTTCACAAAGAAAGGTAAAAAAAACATACTTCAGCG  
GCTATACAACCATATTTAAGTAAATGCACTCAGAGAAAGTATAACAAGTAAAAAACCTAAGTAAAGACATA  
AATATCCCAAATAATGCAAAAACCTCTTTGTCTTTTCTGTGTTATTGACAGTAGTACTAGCAACAGC  
ACCATTTTCAGGTACAATGTC

>Positive Sample 350

ACATGTAAGCAAAGTCTTCCAAGAATCTGGTTTTACTCGTAGCCTTTTAAACGCTGTTTTTTTTTTTTGCA  
CACCTTTAAAACCTATAGAAACTCCTTCATATAAAATGTACTAGTTATAAGATGACTTTTTTATATTCAA  
ATTAGAAGAAAACCTAACTAAAATTAATAAATAGCGGCTATTAAGGTATTAAGAGTGAGAAAAAAA  
GAAAAAATTATAAACTTGAGAAATCAAAGGAGACTAAATGCATAAGCAAAGAGAAGAGGATCTCCTCGG  
ATGATAGATTTATACAATTA

>Positive Sample 351

GTGTGCATATATAACATACATATATAATATATACAATAACCCTTTAGAAAAATAATAACAACCAC  
AGTGGATATTTCCCTTTTGGACCTATGGCTTCCGCTAAGAGAAAAGCATGCTTTTAAAGTTTTCTTTCTT  
TCAAGGAGATTATTTGGTCTTAAGCGAAGTGAGAGATTGAAACAAAATGTTAATTACAGAGTTTACGAAG  
AATCAGTTTGCAAGACCACCTTATTCGTATGGCATTATCAAGCTTTGTGTGTAGACTATCCACACAAACA  
TGATTCAACATACATAGCAG

>Positive Sample 352

TGACTCATCATATGCGTGAAATCTTAGTTATACTGGTAGTTGGTATTAGGGCCTAGCGTCTAATAGTTAG  
TTGGCGTTTTATTTTTTGCACCTTTCCTAATAGTATTAATCTCTAAAAGTGAAAAACTCCTAAGAGTCT  
TTACGAGCTCATTTAATACGTTCTGATCAGAAGCAAGACTATAAAATGCAATAGCCAATACTTTTTAGAC  
TAAAGGTAGACGACTTACTAGCGGTTCAAGCTTCAGGAACACTCACTCTCAATTACGTTCTAGTCCATTTT  
GTCCCTCTTTCCGGTTTTTTT

>Positive Sample 353

CAGTATGAGTACGGTGAATTTCCCTATAAGTTTTTAAACTTTTAGATTTTTCTATAAAGCATGTTAAACCC  
TTCTTGACATCGTTTTCAAACGGCATCTTTCCTACGGAAGTGGCTGTTTTTGGAGATATCCTTATTTAAG  
TTCCTCTTGGCACAATGTTATTTCCCGCATTTATATTTAGTTAACATTATGTGAAATTCGCTCATAAAAAG  
AGCCTTAGCTCTTTCTTCATTTTGCCTCAAGAAAACCTTTAAATAAAGTAGGAATGCCAACAATACTTTT  
CTTCAGTAAAAGACGAATAT

>Positive Sample 354

TTTTGCTATTTGATTTTTCTTGATAGTTTGACAATTCAATAAGTTTATAGTTTGATTTATCCTTTCAATT  
TTACTTGTTAATGACATACTGAGAGCTCATTGGATGGAAGAAAGCATAAACGTAATCAGGGTCTCGA  
GTGTCTGGGTGCTGTCTACGTTAGTACTATTTCGGCTGCATTATATTTCCAATTCACAAATAAATTAGGCT

CATAACCGTAATTTTATTCGAGACATTTTGGTTACTTCAAAATATTGTTATTATATAAAGATCATATAA  
AGTTCTTGGACAAGATTGGA

>Positive Sample 355

AGTCTGAAACAATTTAATGACAAGTTTATCATAATTGTGTTATTATTATATTTATATTTAGAGGCCTATA  
TTGCGCATCGAACTTTTCAAAATCCGCGGAAAATTATAGAATTCATCATATATAATGAAGGAACTGTGTT  
CCTGAAAAGAACAACAAAAAAGGATTAACACAAAATGAAACATAAATATGTCTTTTATCAATTAATTAAT  
GATAATTTATTCTTACCGAACGTTTTCTTCTACCAAGTTTTTCGCCTACGCACCTACATTTCTCTTTTG  
AATTCATGGCAATAAATAG

>Positive Sample 356

GAATTCTGCCTCTATTTCCGGCCATTGTTACCTCTTGGGTTGTGTTTGCTTTTTTTTACTTTTAGTTTA  
TTTTTTTAGACTTTAATGTCGTTCTCCCTTTTTAAAGAGTAAATACATATTTAAAAAAGTGACTATGGCT  
ATTGCTAAACGTGATAAAAATCAGAGCCTATAACACTCTCTGAAATAACGCTATGCAGGAATTTCCAGTT  
AAGTTCTTCTTGGGGTGACTTCTTACTCGGTATGATATGTGTTTTATATGCACAGTACGAGTCCATTAG  
GGTAAATTAGTGGCCGAGAA

>Positive Sample 357

GAGCTGATAAGGTACGTAGAATCCGATGTTTTCTTTAGAGAACGTTGCTATGTTAGTTTATAAGAAATAGA  
GAGCTTTTAATTTTTATTTTTTTTCACTTGTATTTTTGACGGGCTATTAATTTTAAATGAAACTTTTCTA  
CATGATGGAACATAAACATAAATATAGGTATAGATAAATTGTTCTTCTTTTTTTTTTTTTTTTCTTTAAGA  
GAAAGAGTAAGTAAATATATCTTAAAATTACAAAGGGCTTATGCATCATTTTCAAGTTAAAATTATTGAAGT  
ACCGCTCCCTGAAATTATCT

>Positive Sample 358

GAGATCATCGGTTCAAATCCGATTGGAAGCATTTTTTTTTAAATATTTTAAAATTGTTTATATTTTTGTAC  
CACAAACATCATTAGAAGCTGCAAATGAAGTGAATCAGAAAATTTAAAAATGAAACTAAATACTAAATAT  
TATTGTTCTTTTTCTAACAGTTGAAGTGCCAAAAGCAGTAAATTGTTTAAATATTAGGGTATAAAACATG  
ATATTATAAAGTTAATGATTTAGAATGGCTCCGTCCAGCAGAACCAGTTGATTACCATTAATGTTGAGAG  
TTTATGCGAGTTTTTCAGGC

>Positive Sample 359

CTTTTAGTTTTCTTTAAGGCGCTATTGGCATTTCATCTTCAAAGCTTCCGCAACACAGAAATTATATATTC  
ACATTTCTGAGGCAGAGAATAGTTTTGACAACGAAACTGTTAATATTTTTACTCCAGTTACCGCCTTTGA  
AGTCTGATATTGGTGTACAAAGGTAAGTACTTAGGGGTATTTAAGAACAAGAACTACATAAAATAGTTTCGAAA  
AGGGAAAACAAAAGTAACATCTTGATGAACCGAGAAGCCACTAAGTTTTTTAAAAGCAAAAGAAATT  
AAATCTCTCTTTTTTTTTTTT

>Positive Sample 360

TTTTAATGAAGAATGTGTGCATAACTTGATGGTACCTATTCAATATAAAATTTGATAAATAAATAATATT  
ATAAAAATGTCTATGTAATTATTATAAAGCTCTAGAGTATGTATGAGTTGTTACACATAGCATTCCAATG  
AGTACTTGCTTTTTTCTTCGTTCTTTAGACATTTTCAAGAAGAATATTCTTTATCTTGTCATTGTTACTGCA  
ACTACTATTATAGTATTATTAGTATTATTGTTGGTATTGTTACTATATATTTACGCTTAAAAACTCCAAA  
TTCAGACCCCAAAATATAAT

>Positive Sample 361

TTTCTTTGGCTATAGTACTTATTTAACTTTTATTTATGTTTTCGTTATATTTTCAACATTTCCGGAAAAT  
AAAAAAGCGACTTTTTGAGGATATTATCCTATCATCTGTTGAGAAACCTAAGACAGTTAGTTTCTATGAT  
AATACCATCTGAAACGTAAACAGTTTTAAATTTAGCAATAAAAGCTAGGTAAGAAGCCGTGAAATTTTCAG  
TCAACATACAGAAACGGTATATGTGGCTCCAATCAGAAAGTTCCAATACTATTAAGATGCTGACACAATT  
AATGTTGGTTTTAAAATAGC

>Positive Sample 362

GGCTTTAAAGTAATTAATGCAGATGGTTCATGGCATACAAAAAATACTTTGTTTCGTTTGTTTTTTTTTT  
CTTTTTGTTATGATTTTATTAGCCTAATAATGTCCTAGAGTTAACAATGTAATTTGTAAGAGGATACAT  
TACATCTACAAAATTTAAACCAGTTAACTCTCTATCCTCATCCTTTTTAATTTTGTGTAATAAGAGGCAA  
CCATAAAGGTTAAGAAATAGCATCAGATGTAATGGAAGCTGAAAATGCAATGATTGATTATTCAATAAT  
AGTGAATAACGGCGTGTA

>Positive Sample 363

TCCACAAAAATCAAGCCTATTTCTGTATGAGGATTATAAAAAATTTATTTATCAACAACCTAGATATGTTT  
AGTTAATTACTTACGAAAAGAGAGGCTATTGTTTATTGTTGGCCATTTTATTTATTATTTTTTTTCCA  
CCTTAGCATAAGGAAACACGATTTGGATTTCAAAGTAGAGCTTTAATAACAAAAGATAAACAACCACAG  
TGTCAGAACGGTTACAACGAGAAGGATAGGCTGATGATTTATCAAACATCTTCTTATTGGTTCCTAGTA  
ATTTCCCTATTTTTGAGCAA

>Positive Sample 364

GGCGGATAATGAAGACATGATAGCTACTATCAAGGGTATTGGTTTCACAAACACAAGCAAAAAGATTGCA  
TAGCATGTTCTAATATTATTCAATAGATATTAGACCCTGTATATAAGTTATATATATATATATGATTAT  
TTAGGTGTAACCTCACGGACAACCTGTCTAGAGTATAAGATTACTGGAGGATCATTGATGATTTCTTTAA  
CTCTTTTGGGTCATCTAAAATATCATCAAAGAGCGTATGCGAAAAGCGCGTTAAGAATAGATTACTTCAT  
GACAAAATATAATTTCCAG

>Positive Sample 365

CATTTGAAATCTGGACTAGGCGCAAAGTTTTGGGGCTCGGGTATAGAATCTAGTGCTGATATCATAACCTA  
AATAATCCGTTACTATTTCTTCAGTTCTAGATTTTTATTTTAGTATTTATTTTCCACATATTAACATAT  
GTTTAAAGGATTTTTTTCATAGTTAGATTTGTTTAAAGATTTAATATGGTGACAAAAGGTAAAAAGAGAAA  
AATAACAAAAAAAAGGAAAAAAGAAGAAAATAAGGGATCGAAAACGATCTTAACCTAGTACTGCACAAA  
CAACGTAAGTGATGAAACCG

>Positive Sample 366

TGGCTATACTAGGAAAGAAAGTTTTTAAAGATGATTTGTTTTTCTATCTTAAATCTCATATATTTATTT  
TTATTCACCTTCTGAGAAATACAAGTTGCATGTCTCAAACCTTTTACTTTTCAACAAAATATTAATCAAAA  
AAAATAAATGAAAAAAGAAGACCATATTGAAGAACATTTAAAATCCTTTGTTTGAATAGAGATCAAATA  
TCTTGATTAGCTGGTTTTAAATCAGTAGTATATTGCTATGTATGGTTTGATAAGATGATACAGATTGTT  
AGACGAAATTATTATCATAA

>Positive Sample 367

AGTCAAAGAGCTCACTAAGAAAGTGGAAAACCTTGACAGCTGTAATTACCGATCTACTCGAAAAATTAGAC  
ATAAAGGATAAGAAAGAGTAAACGACATGTGTTCAAATACTGCTTAATTAATTTCTCAGAAATCCATATA  
TATATATATATATTGCTCCTCATTGCAACTTTGTAAATTTAATGTTCTTTAATTTATCATTATTTACAA  
TATTAATAATCCATCTCCCGATTTTCGGCATAAAATAAGTTTATATTTTGGTCTACATGAAAACAAAAG  
TTAACTAACTAACGTGTA

>Positive Sample 368

AATGAAAACAAAACCTTCATGCTTTTTCTTCTGTTTATAACAATTTCACTTTTGATTGTTATTCAAAAAAT  
AACATTTAGTCGCAGCTTCTCAGTGTACTAATCTTTTTCTTCTTTTTTCGAACATAAGATTTTCTGATG  
GAACGAAAAAAGGTGATCTTTTAATTATTTGTGAATCATAAATATCCTTTTCATTAATTTTAAAGTGGA  
TAGCGTATTTACATATAAAACATACATGATTATTTTCATGTTTATAATCAAAAATTATAAATAATTATTTA  
ATCTCTAATATAGATTAATT

>Positive Sample 369

AGATAAGGACAGAGCGTGGATTAATAAAAAATGGCAGAATTTCTCGGCAAAAAAAGAAATCATGCATAATT  
ACCTCGATGTGTACGTTATTGCGGGCACGATCCTGTGCTACGGCCTGATAGTAGCGGCTATTCTGCTGG  
CGAAAATTTTACGACGTTTGAATCTTACTGTGGCGTCCCGGTCCAGCCGAGATGACATCTAACTAAGAA  
ATGTCCGCTGCGGCACACCCACGCCGTTGCAGCTAAAGTCGCGCACCAAGCACAGACCTGCTGGAGAATG  
AGGAACAAGGTTGCGTTAAA

>Positive Sample 370

ATCAATCATGACGTAAGAAATGTATCATAATTAAGTTGTTAAAGATGTCAGTGTATGTTGGTGTAC  
AAAATTCTCGGCTTCTCACTAATATTTAATATCTCTTAAATTTTATCTGTCTTTGATTCTTTAAGAAA  
GTTATGTATTATTCAAGAAAAAGTCAATTCGCATCAAAGGTAAAATTTATATAAACTGCTTTAAAATT  
TCATGAACTAGGCAACTTTTCGAAATGATCTTTTTTCGAGCATGAAGTTTCTTTTATAATAACCTGGTCA  
AAAGCTTTCAATATATAATA

>Positive Sample 371

CCGTAAGAAATTTTTATTTTGAATTCATCAATTGGTGACAACTCATAAAAAGAAAGCTAATGCTCAAAT  
GCATCGTTGTACTAACTGCCATAGTGAAAATCCGTTAAGCAGATCGAGTAAAACAGCTGTTGTCGATC  
TTATACTTTTCTATGGAAAACACTATTTAAGCGCTATGTGCCCTTACTTTAGAATGATGACTTTACTGTA

ATATGTCAACATTTTTATTCTCAGCAAATCTTTGGCAGCGTATTTACATAGTCGTCTTTTTTATAATATT  
AATGACACAAATATAAGGCT

>Positive Sample 372

TTGTAATGGAAGACAGTCGAGAGCAAGCCATTGGCTTGGACTTGGCGTTGGACCTATCTTTCGGACCAAC  
TATTTAATGATTAGTAAGACAAAAATGACATTTAAGCATCTATAAAATAAGAAAAATAAAAAAATGAAGG  
GAAAAAGCTAAACACTAACTTCTTGACCAAACAACAAGGAAAAGCCAGTAATTGCGTGAACAAAAGGCA  
CCTGCAATTGTTCTGATGGATGTACTTTGTCCAACCTATTCTGCAAGAAAAAGAAATCAACTCCAAAGAA  
GTATGGAGCTTACTGGCACT

>Positive Sample 373

CGCCAGCAGGAAGAAAAAAGGAATCTAGTAAAAAATAAAAAATTAGGTTTATAAAGTAGTAAGTGAAGTGC  
AAGAGGGGAGCGTTATTGGACGATCATATTGTGATCGGATCCCGTTTATTGGTCTTTGATTCAATTTAAAA  
GAAAAGAAATGTACAGGTTAACTTCAACATACCAAAAAAATAAACAATGTGGCAATTAACAGAGAAG  
AACTAATCTTTAAAAATAGACTTTCAGAACTATATATTAAAAAATAAAGAAATTTCAAAAAAATTTT  
TAGATTGATGTGAGAAGAAG

>Positive Sample 374

ATTGTGCTCACATGTGCTAACATGTGAGCACTCCAAGCTTCTCTTGTGTCAGCTGGATATTTTTATATTTT  
GGCCGTTTTATGGATAGAAAACACGTCAAACGTTTCGATGGATCTTATAAAAAGTAATGATGTAAAGCAAG  
GTACAAAAATGAAAGAAGTACGGTTTACTGTTATATAATTTTCGAAATCGTTCAACTCTCTTAAAGTCC  
TCACGAAATAGATATGATTGCTAACATAACGCAAATTTAGTACAAGATATATGATTTCTTACTGCTGGA  
AGATATCTTCCAATCTTAAT

>Positive Sample 375

TCTTTGTATAAATATCCCATCAATAATGTATTCTTAGGAATCTATATATGTATGTACGTTTTATGTGTAT  
ATGTATTTTACGTTTTTTCATAATCATATACTTTCTGCCGAAATTTTTGCCTTCATTATGCACACTAAT  
GTTATTAATCAGATAAAAATACAGAAATTTAAAATAAATACTGAGAATAATATAATTAAGTTCGAGAA  
TTGTCGCAAATTAATAGCTTCACACTACTCCCACAAGGATTCCTAATTCACGTGCAACAGCAACCGGATC  
TTTTTGAAAATGCTTTCGAA

>Positive Sample 376

GATGTTTGCATTGCTTTTTTTAAGGGAAAATGCAAGCGTTTTTATTTTTAACTTTTGGTTTTGAAGCTCG  
TAATTCAACAAAAAGAATTAATAATCTTCAAGTCCGATAACAAGATGTAGAAAAACATCCCAATGAA  
GTTACAAGTCAACCATTCACTGAGAATTTTTGTAACCTACCACCGATTTTTTGGATAAAATGTATTCTT  
GCAACTTTTTTTTTTTGAAGAGATAAAAAGAATTGAATAGAATATGCAGTAAAAAAGAATCTCGAAAAAA  
AAAGGACAAGAAATCTTAAC

>Positive Sample 377

AAAGACATATACTCAAGGAAAAGAAGTAGTAGATATATCTTCTTTATATATATTGCCCTGTGTTGCTAGC  
AGGGTGTGGAAACAAATAATTTGTCCGTATTGGAAAATTTATAATTAGGTCCAAGAACAAGTTCACTAT  
GATGACGACATATTACTTTGTTCAAAGAGATGGTTTAAAATAAATATGTATAGCAGAATTATAAGAGGCG  
AAATCGATCAATTAGTTGAACAATTAACCTAAAATCTAATATATATAAATATATATATATATATATAG  
GAAATATACGGCAGCTTATA

>Positive Sample 378

AGTTTTCCGTTTAGCATTTATAACCATATAGTAAAAAGTTTCGCAGATAGTGCGATAGTTGTATTCTGAT  
TGCCTTATTATTATTTCACTAATCTTTATTCACGTAGAGCATGACACTTTTTTTTATGTGTTTCCTTTTG  
ATTGTGAAATAAAGGCGAATCCTAACAAATATTAATAATGTTTCAATACATTGATAAAAATGTAAACATT  
ATTTTTTTGTAGTATAAAAATTCGTTCCCTCATCTAAAGAAACAAAAAGCATAACAGATAATAATAAAAA  
AGGCACTTTAGACAGAATGA

>Positive Sample 379

TAAATAAGCGGGCTAAACTTTGTTTATGTTTAGGTTAACGATAGACATATTTATTTTTTTTTCTAGGAAT  
AAAAATGAAGAACGGGAAGAAAAGGAAAAATGAAAATGAAGAATATGAAGAGTAAACCTACTTAAAAAAA  
AAAACCATACTTTAGTATTTAATGTAGCTACCACGCGTATTCGATACACTATTATTTTTCTTGAAGTAGT  
ATGTCAATTGTAGGTAGCCTCATGATGCCCTCTTGATCTAAGCGCGGTGAAAGTCCGCAGGCAATTGCTA  
TAATACTGACAAAATTTATA

>Positive Sample 380

CGCAAATTACTCATCACATTTATTGACTACGAACTTGCTGATGTCCTTTTTTTTATTTATATTTTTCTTCA  
GTGAAGCGATTTTTTTTTTACACAGACCAAGACGGAAAAAAGTAGCTAAGGAAGAAAACAAAATCATGAA  
AAAAATGTGAAGTGATCATGCACATCGCATCAACTTAAACATTGGCTTAGAGATATATAGAGTTAGAGTT  
TACGGCAACCTTTAAGCACCATAACCTTTTGGCATAGTCTAAAGACCTGGTTCTTAATTTTAAACAAATT  
TAACTAAAGATTTCCCTATC

>Positive Sample 381

AGCAATAAAGAATGCCGTTGTGACACTTAAATAGTCATATCACATGCGGATACACTTCTAATACACTAG  
TCTTCTTTCACTGCCCTTTATTTATAAGACTCATGTCCAGTCTATTTTTTTTTTAAAAAAAAGACTTTC  
AAGCTTTTTACAACCTTGATATTCTAATATGAATAATGAATAATGAATAATTAATTAATTGTTTTGTTA  
AATTTTGTTCGGTCTCGGCTATATTTGGAAGAAAAATAGCCAGTACATACTTCTACCCTTTTCGCTCAA  
TTATCAATAAAAACATTTAA

>Positive Sample 382

CTGCCATCTGTCATGGACCGCTCCTTTTCGATGGATTAATAGATATCAAACAACAAGACCATTAATCGA  
AGGCAAAGCTATAACAGGTTTCCCACTCGAGGGTGAATCGCCCTGGGAGTTGACGACATCTTGAGGAGC  
AGAAAATTGACAACGGTTGAACGCGTTGCAAACAAGAATGGAGCCAAGTACTTGGCGCCAATCCATCCCT  
GGGATGACTACTCTATTACAGATGGAAAGCTAGTTACGGGTGTTAACGCAAATCTTCCTATTTCGACCAC  
AATTAGAGCTATAAACGCAT

>Positive Sample 383

CAATCGTTATCAACATTTTTTTATTTCCAGTCCTACCACAGCATTATTGCATAATTAATTTACAGGAAGAT  
TTTCTTGAAAAATAGAAAAGAAAAATACCCATTTTTTCAAGGAAAATAAAAATTTATATATTACATACATT  
TCTATAAACAGTTTTAAATTCAAAAATATAAACAAAAACATAAAAAATAAGAAAAGTTCAAGTCTTCGTTA  
TTTTCTGTTTGTGGAGTAATCGATCTTATTAACATATATGTGGAGACTTTTCAAATATAGCCACCTGCAA  
CATGGAACCATAGTGTACAG

>Positive Sample 384

CGAGGAGAATGTGTGTGTATGTGTGTGTTGTTAGGGCATTTCATATTCTATATTCATTGTTTTTTTTGTTT  
TTTTTGTTTTTTCAGTCTTTGTTTACCTATTTTTTCTTTGCCGCAATTGCAAATATTATTAACCTAATT  
GCGATTATTGAGACTAAACAATAAAGACCTGGCAGTGGAGGCATGACAGAGGATATCGCGAAACGATTGT  
TTAAGAGTATATTATAAAGTTGACTTGTTTCCTTATAATTATAATTATAAATATATATATATAGATTATT  
CACAGGAGAAATTGGGGGCA

>Positive Sample 385

AAGTTTCAAATATTCCGTAGAGTATAAATATCTTACAACATAAATTAATCTTAATATGCGCAAACAAATT  
ATGGTGCGCATCTTTTTTTATTTTTATGTTTTGTCCATACTAAATGCAGTTTATAAAAATTTTCAAATG  
AGTCAAGCTATGTATAATCAGTGCTACAAAAATGATAAGATGCAATTGCAAGAAAAAATCCCTTGCATAA  
AGGGCTTTCTGACCTCTTGCCTGATCAACGAGAAATAACCGCAAACCTTAATTTTAAACTCCCGCGTCT  
GCTTTACACAGCCACAGTA

>Positive Sample 386

AAGAAGCATTTATTGCTAGTATCCAAATTATTAGTATATCATCATGTTTTCAAAAAAAAATGATGTAAAA  
ATTGAGAAACAGTCACCAGTCATCATGAAAAGTGCAGTCAAGGATTAATAACGTAATAAAAACAAGAACG  
ACAGTACATAAACGAAAGAAGAGATAACTATATTATTGTATAGAATTATCGATTCTCTTTTAGAATTCTT  
TTATTCTCCAGGAAACTACTTGTACATTCTGTTTAGCTAATATTGTAGCCTTTAACCAATAAAAATGC  
ACTCCAAGTATAACCCAAAA

>Positive Sample 387

GTAGATCCTTGCCGTTTATATATACATGTAGAGCAATTCTCAAGCTAATAATTAATGTTTACTTCAGACA  
ATAAACATTAAAAACAATTTTTAGAAAAACAAAAGCTGAAGTAAAGACTAAATATTACACAATTTATT  
CATAATTTCCGCCCAAACCTCAAACAGCCTAAATAATATAAAAATTAACTTTTGGCAGCTCCAACCTCT  
CTACTGCCATCTAAAACCTTTCCAGTAAACGGCTTATATACAGTTAACAACCCGTCACTATCAACTGTAG  
CAACTAGATCCTCAATGTAT

>Positive Sample 388

AGAAGTGGTGAAGATGGTGATACCAATGCATATATAATGTTGTCTTGAACCCACTAAAGAAGTGACGCA  
TATATTACTTTTTGTATTTAGTAACACAATTTTTCTATTTTTATATTTCCCTGTATAGTTAGTAATTTT  
AATTTTTTCTTCTTTATCTCAGCTCTTCGACCATTTGGTCAAGAAGTTAGTTTTTTTTCTTATTTTA

TTTGACAATATACTAATTTTATTATATGGTATTGTAAATAACATTTGAGGAATAAAAAGACAGTCACTCT  
ATAAGCTTTATCAGCCTGAC

>Positive Sample 389

CTTACACTTCGTTCCCTTCCCTTCTGTTACCTTTTTTTTATTATGCCTGACTATTCTAAAATTTATGTTTA  
TGTGGCGTAAAATATCTTTCTTCTGAAAACACATGCAGCAGTTACTCCCATCATAAAAAGGAATTAATAAA  
TGAATAGTATAAACAATTATTTACTTAAATATATTTAAATTTCTGCTTGGAAAACCGGCCATGTCGGCGG  
CACATAAAAGTTCTATTTACCTTTAAATTTCTTTTCGACATGTATGGACCGTCTAGTTCATATCCTAGTTT  
ACCATAGTAATTTCTTACAC

>Positive Sample 390

GATCCTAATCACTCCAAGCCCAACGGACAAGCCCAAACACATCAAAGGGGTCCGAAAGGACAATCACATG  
CACAGGTTCAAAGTACTAATAGCCCTGCGCTAGCGCCAATTAACATGTTCCCGAGCTTAAGTAATTCTAT  
ACAGCCGATGCTTGGCACCTTGGCTCCGCAACCGCAAGATATAGTACAGAAGAGGAAGCTACCGTTACCA  
GGTTCAATAGCCTCTGCAGCAACAGGCAGTCCTTTTTCTCCATCACCCGTTGGTGAGTCTCCCTATAGCA  
AACGCTTTAAACTAGACGAT

>Positive Sample 391

AAAGAAAACTAACTTCGGTTCCTTATGATTTGATATTTTTCTTTCTTATTTACAATTAGTTTTCTCAG  
AACGATATTCAATACAGTTCTCCGGATTTTTGCTTACTATATTGGCCCCAAAAAATGAAATAAAAAAAG  
AAAACAAAATAATACTTGGGTGAAATAAAAAAATAAATCAATAGCACCCAGTTAACCTAGATTCAA  
GTTTCTTCTCAATCTCAATTTATATACACGTTTGAGTTAATGGGAAAGCAAAGTCCAGCTATAAAACAC  
TTGACCGTTAGCGCCATACC

>Positive Sample 392

GAATTTAAGGTATCGTACAGGCCCTGCAATTCAAGAAGAATCAGATAATGAAATTGAAGATTTACTTATT  
CACAATTTCAATTCAGATACTGTCATGAATGAAGAGCCGCCCATCCATAGTTTTCTAGTTCAAGCA  
TTAATATACCGGACCACTCTACATCTTCCGAAAGCCGGAAAATAAGAACAAAAATAATAAAAAAAGCA  
CGTTTAATATAAAAAACATTTCAATGTATGAGTTGGATTCTTTAATTTTATTTTAAATACGGTTGCAT  
TTTGCATAGTAATATCCAAC

>Positive Sample 393

TCCGATGATGGTACTAAAAATTTTATATTTAAAAATAAATAGTTAAGTAGTTTGTAAGATGGTATATTC  
AGCGGATTCTTCCCTATTTTTATGTTTTTGAGATATTTGAGCTTTCTATTTTTTTAAAATGCCTGAA  
TTTCCATCTTCAAAAAAACATAAAAAAGGTACTTTACCACCAAATAAATGATAACCACAATTTACTTTA  
CTTATCCTCCACTATCAAGTATCTTCTACCAGGAAAAATGAATTTCAAATGATTTCGAAATTTACGGAGG  
CTCAATATAGAGATAGTGTG

>Positive Sample 394

CTCCTCATATTCTCCCATCTGGAAGAACTCTATTATTCCTTTGCCATTTCTCGTAGTCTTTTTATATTTAG  
TCCGCTTTACACCGAAAAGGTCATTTTTAAAAAGGCAAGAGAAGTAAACGTGCCCCCTTC  
AAAGCGAAGAGATGAATATATTTAGAAGTTAAGAATTTATTTATTTATTTACCAAGTTTTTCAGTTAG  
TTCAGGGACTATTTTGTAAGATCCCCTTGCAACCCATAGTCAGCGACATTAATATAGGGGCATCAGGA  
TCATTGTTAATGGCAACGAT

>Positive Sample 395

CAATTAGCTGCTTTACCGTTAATGGTAGTAAATTATATCACTAGATTTTGTTGTTGATTATTTAATTG  
TTTTTAATTTTTAGTTAGTAGATTTTCGTTTCGAGGCCCTAAAAATGTACCGAAAAGTCATAATAAACGGG  
CGGAGTCACATCGTAAGAGTAACATATAACAATATGCGAGCAGACTTTGTCCATTAAGCCAAGTAACAACA  
AAAGAACCAAAAAAGGAAAGTATCTCGTCTCTGTTGAGTAATTTTATATCTTGCAAGATTTAATTCTC  
ACTACTAATACGGAACCTCAA

>Positive Sample 396

TGTTAGCGAAATAACGATTAATAAATTTGAAAGTCAATACTATGAAACAAGGAAACGAGCAACTTGGTAT  
ACTTCCCTCACCTTTGTAAATTCCTTGGCCTTACTGGCAATCATAATCATTTTGACGAACTGCGGACA  
TCGAGAGTACCCTGCAATATATCTAGAAAAAGAGGTAAAAAATATTGAAGGGTCAACCTGAAAAAAT  
TGAAAAGTGAAAATAGATCTGCTGATAAATAATGCACGGCTTGCATCAAGTGATCAGTGAACCTTTCC  
AATACCTCAACTACGCATTT

>Positive Sample 397

GAAAGGTCGTCTTTTCTTTATTCTTTAGCATTTC AATACCGAACTAAATATCCGTTTTTATAGTTTAGTT  
GGTTTTGTTTAAATTTCTAGAATCCTGTTCCGGCGCTTTTGTTAAAAGTAAAAAATGAAAATTCAAACGAAA  
TGAACCTAATCACGTTAGAATTTAAATCTTGGAATATGTTAAATATAAAACAAGAAGAGCAAGCAATACT  
ATTTCTGACTAATTCTCTATACACATAAGAGCAAACAAAATGTTCCGGTAGCAAACGTCTGAAAAATGTT  
AAGGAAGCATTTAAGTCCCT

>Positive Sample 398

TCATATTACAGTACATACACCTTTTTTTTACTTTTTGTTTCTTTATTAATTTTTTAGTTTTTTTCATATT  
CTATTTTATTATAAGTAGTAATATGAAGAAATTTCCCAAGCAAAGCTCAATAAAAATTATTTAGCTAAACA  
AACATATGCATATATATGTATATTCTCCCTAATTTAATTCCTTGGCTGCCAGGTTGGTAGAACAAAGGA  
AGCTTCGTGAATTTTCTTGTATAGTATCTGTATAATTCAGCCTCCTTCTCATCAGAGATTTACAGTAGT  
GGCTTCTTGACATTGCAAGT

>Positive Sample 399

GCTTTGTAAGCACATCTTGTTTTAAATGTGTATGAATTTTTTATATTTGGTTTCGAAAATTATGACATTCGGC  
CAAGAACTTTTCAGAGGAGCTGTGTATTAGCAGATGGTAAGCGCACGTTGAAAATGCTGAATATTATTA  
TTTAGACATACCTTGATGGCTGAACAGTAGTCAGAAAATTAAAAAAAAAAAAAAAAAAGCGCTTATTACGGCG  
TATACACGTAAC TATATAGACGTAGATCATTGAATATTGATATGATATAATTTTTCCCCGGGATTGCAG  
AATACTGACACGCCTTTTAT

>Positive Sample 400

ATTATGAAACCAAGGCAACATGTAATTTTTAAGTTTAGTAATCTTTTTCGGGATGAGATGTTTTGAAGAG  
TTTTATGCTATTAAGTAGTAATATGATTTATATATTTCAAATAAAATGTAATTTATGAAAGAAAAATACG  
ATAAGCTGATAGGGTAAACTAGAAACCTTCGTTTTCTTCATCATCCACATCCAGTTTCTTTCTACCGCCC  
CCATTTCTTAAGGCAGCCATCTCATTAGTGGCAACTTGCTTCTAACCTTCTTTGTCATCCTGGCTATCT  
CTTCTTCAGCGTCAACTGCA

>Positive Sample 401

TGTGTTAGTTTTTCTTTCTTTCTTTCTTTGTCTTGACGTGATTTGGACTTCTGTCTTGCATTCGCGTCCA  
TTCATCTGACCCAATATTCCTTTTGGTTTTGTTATCCTTATAAAAAGAAAGGAAGCTTCTTAGAGGGAAA  
AAAATGATGAAGAGTAATGCCAAAATATAAATAAATAAATAAATATGAAAATCATTTTCTATTTTTAATA  
GAATAAGAAGAGCATCTTAAGATTACAATTTCAAGAAATAGTTTACACAGTATATCCAATAACTCCAATA  
AACTACTTTCCTATACAAAT

>Positive Sample 402

CCCTATATCTTCCCTCCTCCTTGCAATTGAATTTGTTTGCATTCTATATTATCATATAGTTTCATATCA  
ATTGCAAAAAC TTTTGCAGCCAATGTTACAAAATTGTTTTCAATCAAAGAAATACAGGTGTGGTGTCTT  
CACCATCGATATATTAATATTAATATATCATGAATAAATATAAAAATTCAAGGTAATGTACTTGTGCACT  
TCTTTTAGAATATAGCAATTTCCCTTAGCTCTTTTTCAAATTGTAATTCTCTACAATACATAAAAAGAAA  
TTGATCTTTGGTTCAACTTT

>Positive Sample 403

GAATTTTTACCAATTGAAGA ACTTTATGACAACAGAATGTTCTGATTGTAATATAATGACAAATTTTAA  
TCTTTAGTAATATCTAATATAATAGTTAATGATAAATAGTTAATTCTAATGTTTAATGATCTGCAAATAC  
TTTTTATGTTTTTCAACATAGTTTTTAATGTGTTTCTACACTTGATCGCAACTAAATCTAAATAAACACA  
CAAGCACAAAATATGATAAAAAGCAATTTGGCTAGAAGCACAGGAACCAATATGACGTTCAATTCAAA  
TAGACCCTTATTTCTGGTCT

>Positive Sample 404

TTGTCAGTTTCATAACAGTTGTTTCATACGATTTCCACATGTGTCTCATATATATTTTATGTTTAGGTTA  
ATAACTTTGGTAATGCTAAATATCTTAATTTGACGTACACAAATTCCTCTACTGTTATATATGTTTCGA  
ATTATCTTTTAAATTTGTTGCTAAAAAAGTTAGAGTTATCACCAAATCAGTTGAGCAGATCACCATTATTC  
TTATGTAATACTTGTAAAAGAAGTAGCTTTTCGCAAATACACCAATGCATTTCGTTGATAATTTACGCAG  
TAACCTCTTACAGAACGCCT

>Positive Sample 405

CTATACAAAGCCCATGTTGGCTACATTAGTCTTTGAATCCTTTAGATTGCCTGAATCAATAGCTCATTCA  
AAATATTTTGGACAATCGATAGTTAACTGTAACATGTGCTGCTATATAGTGGCAATCTAGATGCATGTAT  
CTTATATGATTAAGTATAAAAAGAACCACAGCAAAGCTAAACGTAAATAAGTAGTTTAGAAAGTACTGGAT



ATGAGTTAAGAATCTGTTAATTGAGCATGACATGAAAATTTTGTATTAAGCAATATGAGTCGTCACATT  
AAATATATGAAACTACGGGA

II. Negative subset contains 406 replication origins with each having 300 bp.

>Negative Sample 1

CCACACACACACATCCTAACACTACCCTAACACAGCCCTAATCTAACCCCTGGCCAACCTGTCTCTCAACT  
TACCCTCCATTACCCTGCCTCCACTCGTTACCCTGTCCCATTCAACCATACCACTCCGAACCACCATCCA  
TCCCTCTACTTACTACCCTCACCCACCGTTACCCTCCAATTACCCATATCCAACCCACTGCCACTTACC  
CTACCATTACCCTACCATCCACCATGACCTACTCACCATACTGTTCTTCTACCCACCATATTGAAACGTT  
AACAAATGATCGTAAATAAC

>Negative Sample 2

CCCTGTTTTACTTCTTTTATAGAACCCTTATTTTTGACGCAGGGAGGCGACATTTATCCAAATTAAGTTTT  
GACATGGCGCATCAGGGAATAAAAAAACTTTATTATGTGGCCGAATCAACATTAATCAAATGCACTAAT  
ATTGTAACGTTCTTACAAAGGGCAGACAACCTTGAGAACTTTCATGCGTGCAACAGTATTAATTTTTACT  
GTCTTGATATCGTTATCCTCATCGTAACGTGAATTTTTTTGTCTCATAACGTTAAGGTAATTTTTGATGAC  
CCCCGTTGTCCTTGTGTTGCC

>Negative Sample 3

AGCAGAACATGCAGTGAAAGTAAACCCCTTTAAATACCTGGGAGCTTCTTCTGTTTTCCAAACCAAAAACA  
CTTATCCATGCGGTAGATGATTGAGCCATAATATTCATTGTAACATAAGTAATAGCTCTAGTTTGAGCAT  
CTCGGCGACAAATATCGTTTTGCCAAGAGTATAAAACAGGAGCCATAGCCCAACCAAAAACATTGCAGCAT  
AAATGCAAACCATTTGGCTCCTTCTGCGACGTCCCAAGCGGCTAATATGGAGTTACCAATGATATTGAAA  
ACCTGAGTAAAAATAATCGC

>Negative Sample 4

CTATGGACGTGCGGTTATATGATCTTCTAATAAAAAATCTCTTAGACTACGGTTCATGGAATACTTCTTGA  
CTTCTTGGCGAAGGAAAGGCGCATAAATGTTGTGATCGAATGACCAGTAATACGTGCTTTGTTCTCTTGC  
TGAACAGCGAGGAAGAGATATTCATCCAAATGCATGAACGCAGAATCCTGTAAAAGTCGTA AAAATGTTA  
ATCGCAATGTTGTA AAAACCGTCAAGGCATTTATCGTTCAAATGGCGATCATTGTTACTACTAAACACT  
TACTGTTAAATTA AAAAGCT

>Negative Sample 5

TAGAATTAATGGAACATTTACATATTTGGGGGATTGATGCCATGCTACAGCTATGAGGAGGATGCGCC  
GATGCTGAACGATTTTTTTGTAGACGGAATAAAGA ACTTACCTCCCCCTTACTACCTCAAGTGATTAAT  
AATCCATCAATGGTCAATAATCCTCATCTTTATGTGCTTCTATACCATCATGCCGTTTTAGCAAACCTA  
AAATGGGGGGTTATATACCGCCTCCATTGCTATGTGTTCAAGGATCCAAATTAACGGACCGACATATTTT  
CTTTTATGGCGGATTTGAAA

>Negative Sample 6

TCCCGATGAAAAGAAAAAGGGAAAAAGTCGATAAAAAGAGGTAAGCGAAAAGAAAAAGAAAAATAGAA  
AATTTGGGTGGGGGGGGCGGAAGATCCCACGCCGCGCAAGAGATATTTCAATATTACTACTACATAGTAT  
ATGCGGCGCTACCATACGTACAACCTTTTTTTCTTTTTTTTTTTTTTTGCCTTCTAAATTTGTAATTCGG  
TCACACTTTTGTGCGCAGTGTTGCAAACGTCTTGAAAGAATTGTAGGTGTTGTA AACCAACTTGCTCCC  
TTGAAAGCGTTGCTGATTAT

>Negative Sample 7

ATTACTATTATATCGAAACTCCCGTACATGGTGAAACAGGATGTATAGATCTTTTCGATCTAATTGAATT  
TAAAACCAACATGACCGAATTTGAAGCAAAATTGATATTCAAGCAGGTTGTAGCGGGAATAAAACATCTA  
CACGACCAGGGTATTGTTACAGAGATATCAAGGATGAGAATGTTATCGTAGATTCTAAAGGCTTTGTTA  
AGATTATTGATTTTGATCTGCTGCGTATGTCAAAGCGGACCATTTGATGTTTTTTGTTGGGACAATAGA  
TTATGCTGCCCTGAAGTCT

>Negative Sample 8

TTTAATGTGAAGCTAGTTAAAGTACAGTCTACGTGGGACGAGAAATACACAGATTCAGTAAGATTTGTGA  
GTCGAACAATTGCTTATTGTAATATTTATTGTTTTGAAAAAATTTCTGTGGCTTAAAGACGATAATGCCAT  
TGTGAAATTTTGAAAAAGTGTACGATAACAATCCCAACCGAGGATCGGAGCTGTGGATGTGAAATTAGTC  
CTCAACCCAGAGCATTTAGTGCAGAGATTAGAGAAGGATGGGAGATTTATAGAGACGAGTTTTGGGCCA  
GGGAAGGTGCTAGAAGACGC

>Negative Sample 9

TGTCTAACCAAGCCCTCGACTGCGTTGTTAATACCATATGCTCCTCTAGGGTTCAAGGTATATATGAAAT  
TTCTCAAATAGCTCTGGAGTCGCTTTTACCCTATTATCATTCAAGAACAACAGAAAATTTTATACTGGAA  
CTAAAAGAAAAAATTTCAATAAAGTTCTTTTCCATATCTATAAAAGTGAAAATAAGTACGCCAGTGC  
TTTCACTTATTTTAGAACTAAGGACATCGAAAAAGAATATAACACGGACATTGTATCCATAACCGACTA  
CATACTCAAAAAATGCCAC

>Negative Sample 10

TCAATGATAAAACCACAGCTGAAGAATTGCAACGGCTTGATAAATCTAGCAATAATGACCAGCTAATTGA  
ATCTTCTTTGTTTCATTGACATTGCTAATACCTCTATGATTTTAAAGAGACATACGGAGTGATTGACAGC  
TTATCCCGCGATGATATCAGTGATTTGTTATTTAAGCAGTACAGACAGGCAGGAAAAATGCAGACCTATT  
TCTTATAACAAGGCATTGAGAGATCAAGGGTACGTTTTGTCCCCAGGTGGACGTTTTGGTGGGAAGTTTAT  
AGCATACCCTGGTGATCCTC

>Negative Sample 11

TTCTAATATGATGCAAAGCCATCAAAAATCATGCATAGTTATGAAATACCTGATGAAACGCTTCGAGTTC  
GTGCTCAAGAAATTACTGAAAGGTTACCGAGAAGAAAAATATCTATGAGACACGATAAGGCCCTTCTGA  
ATCCATTGTCCTGGGCTTGTTCATTCTATTTACCCTTAAAATTGATCCTTTCAAAGGAATTTTTTTCTA  
TTTCCAATAGTATATTTGTACAAAACTACAAAAATGGATAAAAAATAACAGTAATTTGTGACTACTGTA  
AATATCACTGATTTGGATTT

>Negative Sample 12

GCTGGTGTAAGATGGTGTATTACTTAAGACTGATTTGGTTGCTCAGGTATTTTCATTCAATAAAATTG  
TGAAAGAGAACCTGGAATATAGAATGGAAATATATATCCTGCTACTAACCCCAATGGAAGGTGACGATCA  
CTTCTTGTGCGTTCCAATCCCAGTTTTTGAATGTGCGAGTGGAAAAATTCTAGAGGAACAAATTGATATT  
TTCAAATCAGAATTCATCAAATATATGTACTCTGTAAAAACCAAGGATGTGATGAAGTTGAGATATTGTC  
TTTATGGGAAATTGACTTCT

>Negative Sample 13

CAGCATCTGGTTCAATCGCTTCTACTGCTTCCACCGCTTCCACTACTTCTACTGCATCCGCTGCATCCGC  
CACCAGCTTCACCTCAGGTTCCGCTTCTGTCTACACTACTACATTAACCTACTTGAATGCCACAAGTACA  
GTCGTGGTTTTCTGTTCCAGAAACAACCGACGCTAGCGGTAACATTTACACCATTACCACAACGTCCCAT  
GCTCATCTACCCTGCCACCATCACATCTTGTGACGAAAACGGATGCCATGTTCCAGCACCAACTGTAC  
CGACGCAACTGCAACCGTTT

>Negative Sample 14

CAGGTACCATACCCCTCGGAAAGTTATCTGACATTGACAAAATCGGAACTCAAACGGAAATTTTCCCATT  
TTTGGGTGGTTCTGGGCCATACTACTCTTCCCTGGTGATTATGGTATTTCTCGTGATTTGCCGGAAAGT  
TGTGAAATGAAGCAAGTGCAAATGGTTGGTAGACACGGTGAAAGATACCCACTGTCAGCAAAGCCAAAA  
GTATCATGACAACATGGTACAAATTGAGTAACTATAACGGTCAATTCAGCGGAGCATTGTCTTTCTTGAA  
CGATGACTACGAATTTTCA

>Negative Sample 15

ACGACCTCGCGCTTCGAAGTAGAGGAGCCCTTTTTGGCGTACCTACATATGGCGCGTCAGACAGACAAAC  
TTCCCCAAAAATGTATTACCCCGCCGAATAAGAAAACAGACCCATTACCCACGACGTATCAAGTACT  
TCCTTGGTGCAATGTCCCACTATAAAAAAATTCCTTGACGCTAGATCGTTGGACTAAAATCTGCGTCACA  
ATCGCCTAACAGGAAATATTGCCTATTTTCGTACAAGGTTACTTCCTAGATGCTATATGTCCCTACGGC  
CTTGCTAACACCATCCAGC

>Negative Sample 16

CTATTTAAAAGAGTCACCTTCCGATGGACCTTCAAAAATATAAACGTGGCTTATCTCAGAGCTAAGACA  
GACCTTCCGAGCAATAATAATGAGTCGTTCTATTTTTTTTTTCTCGTCCCTTTTTTTGTCCCCTCTTAAC  
AAAATTAGAAATATAGGCGGGAAAGTGGAGAACCCTTGAAGAGTCAGATCAGAGATTGGAAAAATTAAG  
ACCAATGGATATCTACAGATCCTGTGAATCGAGTGTGAGTGATATACCGCAAGATCGGTAGAAAACCTGTA  
TATAAAGCAAAGAAGTATG

>Negative Sample 17

GGTCGTGAAGCCTACCCTGGTGATGTCTTTTACTTGCATCCAAGATTGCTAGAAAGAGCCGCTAAGCTTT  
CTGAAAAGGAAGGTTCTGGTCTTTAACTGCTTTGCCTGTTATTGAAACCAAGGTGGTGATGTCTCCGC

TTATATTCCAACCAATGTTATTTCCATTACCGATGGTCAAATATTCTTGGAAGCTGAATTATTCTACAAG  
GGTATCAGACCTGCCATTAACGTTGGTTTGTCCGTTTCTCGTGTCCGGTCCGCTGCTCAAGTTAAGGCTT  
TGAAGCAAGTCGCTGGTTCC

>Negative Sample 18

TTAAATGGCATCTTAATATTTTGTGAGCGGTATTATACCTTTCTTGGGTACCTAATACTTCTAAGCAACC  
TGAATGAAATTAGAAGGTGTTCACTCCTTCATTAGCAAGTGAGCTTTGCCGTTGTCACCGTACTTGGTCA  
TCTTAAGAGATACAAAGGGGGGGGACCCTGAGAAAACCTTCTCCCGAAAAAAAAAAAAAAAAAGAAATATACCCAC  
GCGTTCTTTACCCGAAATAAATATCTTGATTTAGCCGCCGAGATTGTTATATATGCATCCAAGACCTCT  
GAATGGTGGCTAATTAAGAC

>Negative Sample 19

TCATGTCATCACAATGGATCTCCATGCCTCCCAAATCAAGGGTTTTTCCATATCCCGGTTGACAACCTA  
TATGCAGAACCAAGTGTAAAAATTATATTAGAGCCCGGAAAACAGATTTTCGACAATGCTATTTTGGTGT  
CGCTGATGCAGGTGGTGCTAAGAGAGTAGCTGCTTTGGCTGACAAGTTAGATTTAAATTTTGCTTTGAT  
TCACAAAGAGAGGCCAAAAGCTAACGAGGTTCAAAAATGGTGTCTGTTGGTGTGTTACCAATAAATCA  
TGTTTATTAGTTGATGATAT

>Negative Sample 20

GAACAGTTAGACTTCTAGTCTTCCCACCCTTAGATAGCATGTACAATTGAGGTAGAATAGCCACACTCTC  
CAACCATACAGAAAACTCCATGCTAATCAAGAAAAGTGAAGTTGTGATGGAAAAAACACTCATTAGA  
GCACTCCCAATTAGTAAATGCTGGATCTTAAAGGTATCATGCATAAGCATTTCATTATACGCAATGGTGT  
TGTTCTTTTAGACCCTTGTAATAGCACTACAATGTAAGCGGTAGATACAATGAAAAATATTTTCATTAG  
AGCATTGTATAGGGATAACCC

>Negative Sample 21

AGAACTAAGGTGAAGGAGACTGTTTCGTAGAATAAATGAATATTGATTAATAATTTCTGAAAAAAGAGT  
AATGAAGTCGTAGTCATCGCTAATGTACCGTAAGTGAGTTCTGAAAGGAGGCGGGTCTTGTTTCAACGT  
AGCTTGTCTAGTCTTTATGGCATCGTGAAAATTGGTATATATTGAGAACACCCAGGAGTGAATTGATT  
TGCTGCTATAGGGGAAATAAGATGTAACGATATTTTTGTACTGAATTTCTTTGATGATACTGCCAGGA  
TTGAGAGTTTGGTTGCCACA

>Negative Sample 22

CTCAGAGATTCTAAAGTAAGTTCTTCTCTTAATGGGTCAATGTCCATGTCACTCAATAGATCGTCATCAC  
TATTCTCTAAGTCTCATACTGCCTTCTCCTTCTTCGTCTTTCGACAGGAAGGCCCATTTTCATCAAGTTG  
CGCTGCACCTTCTTGTTCTTCGTCCTCGTCATCTATGTAGGCAACATTTCTCAATAGCCTATCTCTTTCA  
TTTAGTTGAGCATCAATGCGGCGACGTTTCGCTTAAAGATAGTTCTTGTTGTTCCCTGTCGTCAACTTGAT  
CTGGATCATATCTATCTCTA

>Negative Sample 23

CGCAAGCCCAGGAATCGAACCGGGGGCCCAACGATGGCAACGTTGGATTTTACCACTAAACCACTTGCGCT  
TATTTCTTGGAAGTGTGTATCTCAAATGAGATACGTGAGTATGACAATACGTATCCTGAACGTTTCAT  
AAAACACATATGAAACAACCTTATAACAAAACGAACAACATGAGATAAAACCCGGCCTTCCCTAGCTGAA  
CTACCCAAAAGTATAAATGCCTGAACAATTAGTTTAGATCCGAGATTCCGCGCTTCCACCACTTAGTATG  
ATTCATATTTTATATAATAT

>Negative Sample 24

AAAATGACCAAAACTTGATACTGTACTTATTTTTCAAATACCAGGGAACCTCCTATCAAGGTGCTCTAA  
CATTGATTACTCTCAAGCATTGTCTATTTTCTGGCAGTGCAGCAGTATTTTATATGTTGCTGAATCCAAA  
TTTCAGCTCGAACACAGGAATCTAACTTTGGACCATATTTTGATAGACTCTAAAGGGAATGTTACTTTAA  
TTGATATGAAGTGCTGTCGTTTCTTGAATATAGACAACAATAAGGCTTCCCTATACAAGATTAGACCATCA  
TTATTTCTTCCAAGGCCGGG

>Negative Sample 25

CAGTTATTATTAATTTGTTTCTTAAACTCTCCTTAAAGATATACCCTATTTAGGTTCACTACACGAGCAT  
TCATTGAGAAATTTTTTTTAAACAACATCGATCTTATCTTGAGCAGTTTGGTGTCTTATCAGTTCTAGTC  
CCAACACGAATATCAGTGTGACTCTAACATATCCTTTCTCATGACCGTATTCATGGATTTCCGCAATCA  
AACCCATCACATATCCCAAGGCCCTTCAATTGTTGTTCCCTGCACTGTGTAAGTGCTCTTTAATGGGCT  
TTCTCTGATTTTTTTTTCAA

>Negative Sample 26

CTTTCCTGTTCCCTTTTACCTGACTAATTATCCCGCCATTAGTCAGATGATTGATACCAATTTTACTC  
AAATGTGTACTATCATGTCCCTTTTCGCACTGTTATTGCTCCTTACCTAAGCAAATATCCTTTTTTTTTT  
CTTTGCATTTGTCTTCTTTTCATTTGAAATCTTCATAATCTTCCGGAAAACTAGTGATGCGCAATATTGT  
AGAGAAAAGCGCAGGGCATTCTATACTTAGTAATCACCATCATAACGTATTTTAAAATGAAGAAGCGAA  
CCTCATAGAATTTTCTATAC

>Negative Sample 27

TTCAAAAAACCTAACTCCGCTTTATGGTCCCAATTAGTGTGCATTCCATTTTTGTTTTCCATCACTTGT  
TTAATTGGAATTCTAGTCACCGCAGCTGGTTATGAAATATACGGTATTAATTACTGGTCGCCACTCGATG  
TGCTAGAAAAATTTTACAGACTACTTATAATAAGGGCACAAGAGCTGGTGTTTTCTTAATCTCTTTTGT  
TTTCGCCGTAGCTCAGTTAGGTAATAATTTCTGCAAACCTCATTATCGTGTGGAAGTATGATGTCCGT  
ATTTTCCCAAGTTTATCAA

>Negative Sample 28

ACATCGTTTTGACTTTTCACTATAATCTTGTCTTTCGCAAGAAAATCTCTGATATATCGTAATCCGGCCT  
TGATCCCATTTGGTCACTTCTTTTTTCGGGATACTTGAATAGTGCTCCAGTAAAGAGCATGTCAAAGATGT  
TGAAGTTGCTGTAAAGTTGCTCCTGAATGCAATCCATGAATAATTGTAGACCAACCCTCCCCAGCTTTCGA  
GGCCTGTTTGATTGAAGTCGTGTGTTGGTAGCTTCATCTACTTGTAGGGAATCTAGTAACTCACGCATTA  
CATTGTGAAGTCTCATGGTA

>Negative Sample 29

CAGTTAGCCATTGAATGGTGTAAACCACAGAACTGCAAAACCCAACGAAGGGTCGACTAAAATAGAAGG  
ATATCTGGTGTAATTGCCGGTTAGTCCTGCATAACAGAGACCTAACTCGCCTGCCGCTTGGATGATACAG  
TAAAGCATGATCGATGCTATTCCGTAACCAAGGACTAACCCGGCAGGACCAGCTGTTCCCAGCACCTGAC  
CATTACCGACCAGTAAACCAGTACCTATACCGGTACCGAGACTGATCATGACTAAGTGACGAGATTTGAT  
CGACTTTGTCAGGTTGTTTT

>Negative Sample 30

CAAGGTTTCATGTTTTACATAATAACCGAAACTCAACAGAGAGATCTCCTTACGAACCAATAGTTGCAGAG  
TTACTTTTTGGAGGTGAAGGAGTTCAGGGCTTGCACTTTAACTTTTTGAAAGTAGACATCAGGCGAAGTCAC  
CTGTCAGAGAAATCACGGTATATCAAAAGAAAAATTTCGGCCCCACAGAAAGCTAATATCACGAAGACGAT  
CAAGTCTGCTTCTGGCATAAACGAACCTGCAATTGCATAAACTTGATTTTCGATCAGGAAACTTACCATATC  
GGAGTCCAGTGGTTTCCAAA

>Negative Sample 31

TAGATTTATTCTCTGGATTATTTATTAAGATGAAAAATAAGAATAAAGAAAAAGAAAGAAGGATGAAGAA  
AAAAGAAAAATACAGGCCAAGGCCTTTCAAGGTGAGCTGTTGCCAGGTTTTTCCGCAGCGGGAAAAATCT  
CGCAGACCATGTGACCGCCGGTACTCCTTTTCTGTTGCTCGGCCATTTGATCCTCGCTTCGAGAAAAAC  
TATAACAATTGATTAGTGCGGAGAGGAGGATAGGCCGTAAGATCAGTTTTGTTTATTGTATAAATGAGAT  
ACTTTGGAATAAGGACATTA

>Negative Sample 32

CACAATGATGAAGGTTCTTTGTTAAGTGCATTCCCCCCTTTTAAAGTACCTTGGCTATCAATTTTATACC  
CATTTTTCGTATTTACCATTTAATTAACGATCCAATTATTAGCGTTAATTACGGAAGCGCCAATGAATTT  
TTAGAAATCAGAACCATAGTTTTGAGCTCAACGGAACCTATCCAGGATAATTTCTCAAAGCTTTATCAAGA  
TGAGCATAATTTTCTTTTCGGGGTGTAGACCTTATAAGAGCTTCCGCGTTTTTGTCTACATTCCATTGA  
GAAATTTGTTGCCAAAGTTT

>Negative Sample 33

TTTACTCTTCTTTAACTTATGACTGCTCCTCTACCGTAACTCAGATAACCATGATTCCTAACTTTGA  
CGCGTTTGCCGTTTCCAGTAAAGATGGACAAATAATTGTATTAAGGTTAATCATTACCAACAAGAAAGT  
GAAGTCAAATTTTTGAATTGCGAATGCATCAGGAAAATTAACCTGAAGAATTTTGGTAAAAATGAATACG  
CAGTGAGAATGAGAGCATTTGTGAATGAGGAAAAATCTCTACTAGTAGCATTGACGAATTTGTCAAGGGT  
TATTATATTGATATTAGAA

>Negative Sample 34

TGACAAAACCTTTTGAATTTATCCATTCCAGAGAGCCAAAGCTACTTTTGAACCTCTTTCAGAGGGGAC  
ATTATCCAGTTTGATTTGAAAATCTGACATTTCTCTAAATTTTATAGTGTTATCTACTATGGAACAGGA  
GTGACTCTCAATTTATTCGAATCTTTAAGGATTTGATAGAATCTTTGACGCTATTATTATTTTACTTA

AAGTTCCTTAGGCATTGTAACCTTTAATATGACCGACTCATCTCTGAAGGGAACCTTTTTACCAATTAC  
AGGATGCTCATTAATAATAGC

>Negative Sample 35

TTTTCTGGAATTGTTTTTTGAAGCTTTTCCTCATTACGCTCCAACGATTTCCACATTGCAGGCGAATC  
CTATGCAGGACATTATATCCCTCAAATTGCACATGAGATCGTTGTCAAGAACCCTGAAAGAACGTTCAAT  
TTAACTTCAGTTATGATTGGTAATGGTATCACAGACCCTTTGATTCAAGCAGATTATTATGAACCAATGG  
CATGCGGGAAAGGGGGCTATCACCTGTTCTCTCATCAGAAGAATGTGAGAAAATGAGTAAAGCTGCAGG  
TCGTTGTCGTAGGTTGAACA

>Negative Sample 36

TGTTTCAGACACCAAACACATTTACATCTCAGCCTAATAAACAGTAGAAAATGATTTTCACAAAGGTGG  
GAGACATGTGATTGACTATCTGAACAAAAAATTGGCTACTATGAACATTGATATTGATTGACTTCAGGG  
GGGAAACAAAACGTATCTTGGGAGGAAGAGCTCGACCAATTGAGCGACCACGTTATAGAAAAGTATTACTA  
ACCACATTTCAAAGGGTAGAATGCACGCACAAGAGAAGCAAGATGAGTTGGAAAAGTTAAAATTGGAGAA  
TTTGAACTTGTC AACATTAA

>Negative Sample 37

CTCCTGTTCTCCAGTTACTATGCGTTCAGCGTCACGTTTTTCGTATTACCTTGAACATGACTACCGTTTTA  
CTATGTTAGAAATTGGTGCTGCTTATGTCTGCCAGGTGTAGCTATGTTACTAGGATCTCAATCTGGTGG  
GCACCTCTCAGATTATCTTCGTTACGCTGGATCAAAGTCATCCTAAAAAGAAATTCCCGGCAGAGTTT  
CGTTTTACTGAACCTAATTGGAATTTACTAACAATATGTGGCACAATAGGATACGGATGGGCAATCT  
TCTTTCATTATCATTTTGTG

>Negative Sample 38

ATGTCGTTACACCGAGCATATGACCACCATGGGTAAATATAGTTTTCTTCGCAGGAGGTATCCCATAGCT  
TGACTAACCCATCTTCTTGGCCAGCCGTTGCCAATACAGTATCGAAATTTGGACTCCATTCTAAAGTTGA  
AACGGAAGTACCGTGCTCCATGGTAGCGATTGGGCTTTTGTTCATGTTTCTAATATCCCATAAATTTAGC  
CTCCCATTTGAATCTGCAGATGCTAGAATTAAGAGTTCTTATAGTTAAATCTACAGGAGTTTACTCCAC  
CATCGTGTTTTTACGGTTA

>Negative Sample 39

TGAATAATGGTTTCGACAGAGAATTTGAAAGAGACGAAAATCAAACAATATTAACATTACAAGAAAA  
CGATACAGCAACCTTTGCAACAGCATCTCAAACCTTAATTTTGCCTCAACTAACCAAGACAACACTTTA  
ACTGGCGAAGACTTGAAGTTAAACAAGAACTCTCAGATTTATCTTTATCGGGCTCCAAGCAGGCTCCAG  
CCCAATCAACTTCTGGATTGAAAACCTACTAAAATTAATTTTATTACAAAGACGATATTTTTGCTTTAAT  
GCTGAAGGGTGACACAACCT

>Negative Sample 40

GAAAACAACCTTATGAAAGACACTTATTAGTTTCCGGGACTCTGGCTTGGATAGAAATTTTTCTGGG  
CTTGTAATGCCAATTGCATGAATTTGTCGCATTGATGGTTATGGATCATCTTCAAATTTAGATGATTT  
AGGATTAGAAGAGCTTTTTAATATCAAGTCCGAAAAGCTATATATAAAAAACTATTGTTGCCGAGACCCG  
GATATTCTCGAAATATCAAACCTATTTGATATTAGATATGGGGCCGGATCTGAGGCTGATGCTACTTCTG  
ATTCCAATCTCGAAGCAGAA

>Negative Sample 41

CATTTTACGTTGGATCAACTCCTAACCCAGTACGACGTTTGAAGCAGCATAATGGGAAATTGGCTGTTGG  
AGGGGCATATCGAACCAAACGTGACGGTTCAAGGCCCTGGGAAATGATAATGATTGTGCGGGGCTTCCCA  
AGTAAGATAGCAGCTTTACAGTTTGAACATGCATGGCAACATGGGTACCAAACGCATTATATTGCCGAAA  
AAGATCGTGTGTAAAGCATAAAGCAGGTGGAAGAAGTTTACATCACAAAGTTGCATTAATGAAGTTACT  
TTTAAAGCATGAATTTTTTC

>Negative Sample 42

CGCCATGCTCACGTACTTTCTTCCGTATCGGTTGGCCCAGTTACCGGCGTAGTACGACCCAAACAGTCC  
GCCTATGCTGAATATAGACGTAATTGCGCCGTTTGAAGAATCGGTTAACGCAATGCATTGCTTGAGTCCG  
TGTTGCCCAACCAAGTGTATCGTATGAGATGTTTTCTGCTGGTGCCTCAAATCTGGAGCACGATAAGA  
ATTCTTGAGGCGCATTCAACTCTGCGATGTGGTATCCGTACTGGATCGACCCCAAACAAGCAACTATCGT  
GCCCAAGATTAAATGGCCCG

>Negative Sample 43

CCAGGTTTACTCAAGTCCTTACCGAATAGGCCTATTTTGATGAAGGATTTGCCACACGTGGAATCAACA  
TATCTGTAGCTAAATAGCCTGCTATAACCAAATCCCACGGCCGCAACAAGAGCAGATGGGCCCTGATTTTT  
GGAATAGTAGATTAAGCATGTGATAAGTGCCAGTGAAAAAAGTCGCAACATATAGTCTACTTTTTGTTAC  
CGTTCTCCGCCTTGCTCTACTTGATAAAGTTTTTATTTACATATTTACAGTTATATACACATGTAAACA  
ATTTAATTTTCGCGCTGTTT

>Negative Sample 44

TGAAATTGGTATGCCTTTCCAAATGATATTATCAATTACCAAACAGATTCTTCCATTGAATTACAGGAA  
GCTTCTTTGGCAGTTGCACAGAGAATGGCAATACCAAGTATTGATTTGAAGACCAAGAAAATACTACGAG  
AGCCATACATTA AAAAGTCCGAGTATTTACTAAGAAGTGTAGAAAGCCAAAGTTTCGATTCCGACAAGAC  
CATTTTCGGATTTTGCTTTGATGACGTTGTCATCCCAACCTATGCGGATGGTCTACCGAGCTGGTTTAAA  
ACATTCTACTGTGAACCAAG

>Negative Sample 45

CTCGATAAGAGAAGTGCCAAGTTCGTCAATAACCAACCACACTACAGAGACCAACTTCTGCAGTAATTCT  
TTTTGCACTACTTTTTTTAGTATTTTGTGCGCATATATACTGCTTACCATTGTACATTAGATAATTCTT  
CACTACCCCTCTATAGCAATGTTATAGTCATTGAATCATGCTTTGAAATGCCTGTTCTAATATTCTCTT  
CATATAATAAATGCGTGATGCCGGTATTTGTGCGCCCTGTTTGGCGCAAAAATCTCGAAAGTGAAAAA  
ACTAATAGGCTTCTTAAAGC

>Negative Sample 46

TGTATCTTCTGGATATAAATTCTTGTTAATAGCTGATAAATCAAATTGTTTATTCTCGCAATCACTTGAA  
GACGCTAGCTTTTCGCTCTTTGGCGTTGGCGATAGATCGCTTTGTATATGCATATGAGCTTGTGGAGATG  
GAGGTGGCAAGTTAGTTTTTATCCACGGAGAGCTTCCATTGGAATAATTATCGTGTTGAGACCTACGGAG  
GATATGCTGATCAATTCGATCTATCGTATGTTTCTTTTTATCTGAAAAATCTTTCGACATTGCAAATTGA  
CCACAAAAACGATTTTGCAA

>Negative Sample 47

TAGCGGCTAGTATATAACCGTTTACATTCAGCAGATTTATGCGAACTTCTAAGAAACAGTGTGATAACCAG  
TGGATTTTCAAGTACCCTAAAGAACAATGGCTCGGCGTTTCTTAGCCAGCCATGACTACTTCGTGGAA  
AACACTGGGTTTGTAGACAAGTGGTATGATTGTAAACCAAATACAAGTTTAGAGCATAACGTTCCGATCA  
TCAGACGTCAATATCGCAGTAGCACTCTCGCAGGGGAGTGGCGACTCATAATTGCGTGAATTGCTCATG  
TTTCTTCGAGGGGCGCATAT

>Negative Sample 48

CCATGGATCAAAGAAGTCTTTTGAGTGTTAAATTCGGAACTACAAATGAGGAATATAGTGACGACTCTA  
TTATCGCTGGCCATTCTAGTTTTACGTTGCAAAAAGTTTTGAAGGATGATGTGGATTATACTGATGAAGA  
CAGCCGTATAAGCACATCTTACAGTAACTATGAAACATTATGTGCTGCAACTGGGACAAATTTACCGTTT  
TTTCATATCGATATAACCGATTTTTTCTAAATGGGACGTTTAGTGTAGTAGATAGTAAGTACTTTAATTAC  
CCCCCTGTTTTTAGTTATA

>Negative Sample 49

AGGTGTTTCTGCTCAAAATGTTTCTAATACAAAAGCTGTGACTGGTAAGCGGGTAGAAGGAACATCATA  
TCTGGTTTGAAGTTACAAGGAGGGAAGTGTGCTTGGCTTGGTCATAACAATGATCCTGACGTTTCGAAAAG  
CCCTTGAACAAGGATATTCTGTATTCTGTTTTAGTGTTAATGGTTCAGTCACTGCAGTTTATGCATTAGA  
GGACTCTTACGGGCAGATGCTGTCTCCACTATTAAGTTGTTACGCCAAAGAGGGATTTCACTACACATT  
TTATCAGGGGATGACGATGG

>Negative Sample 50

TTTGATGCTTTGGCTACGGAGTCTACTAGCGGTTCTTGCCTGAAGACTCACTGAAAAAATATGGAAAG  
AGCTTACACAGCATCCCTTGAATAGAACCATGGTCTTATGGCTATGTGGACATTTTCTTTCTCGACA  
TTGGATTAGGGCGCTGGCTTGGAAAGCTAGTGTTCAGATGAATGGTACCAAGTTTTTCTCAAACGCCAAT  
AATGCTCACATATTGGTTCGAAATTGCAAAGGATATGCTGGACGACATATTCTTAACTCCAAACAACCTGT  
ATGATGTACATGGTCTGGA

>Negative Sample 51

CACCCACACACCACACCACACACACCACACCACACCACACACCACACCACACCACACCACACCACACCACA  
CACCCACACCACACACACCACACCACACCACACCACACCACACCACACCACACCCTAACACTACCCTA  
ACACTACCCTATTCTAACCTGATTTTACCTGTCTCCAACTTACTCTCCATTACCCTACCTCTCCACTC

GTTACCCTGTCTCATTCAACCGTACCACTCCCAACCACCATCCATCTCTCTACTTACTACCACCAACCCA  
CCGTCCACCATAACCGTTAC

>Negative Sample 52

AATATTTGGAGGCGTTCTTGGGGTAATTGGAGCAGGGCTTATGACACTTATGACAAATACGTCCACGAAG  
TCAACTCAAATTGGTGTTTTGGCTATTACCGGGGTTTTCCCTTGGATTTGCTCTACAAGCATCGCTCATGA  
GTGCACAGCTTCAAATTACCAAAGATCGTCCAGAAGCTGCTATGGACTTTATTGAAGTAACAGCTTTCAA  
TACATTCATGAAGTCATTAGGTACAACCTCTGGTGGTGTGCTTTCAACCACTGTTTTTTCCGCCTCCTTT  
CACAACAAAGTATCACGAGC

>Negative Sample 53

CCAAAGATCGTCCAGAAGCTGCTATGGACTTTATTGAAGTAACAGCTTTCAATACATTCATGAAGTCATT  
AGGTACAACCTCTTGGTGGTGTGCTTTCAACCACTGTTTTTTCCGCCTCCTTTCAACAACAAAGTATCACGA  
GCTCATCTAGAGCCTTACGAAGGAAAAACGGTTGATGACATGATTTTGTATCGTCTTCAAAACTACGACG  
GTTCTCATTGACTATTGGAAACATTTTAAGCGACTCCATTAAGAACGTATTTGGATGGATCTAGGGTT  
TTATGCCTTAGGATTTTTGT

>Negative Sample 54

TTTGTATAAAATATGATATTACTCAGACTCAAGCAAACAATCAAAGAAATCTTTCCTGCTCTTTTTCTGT  
GTTCCATTTAGTTTTTAGTACGATTGCATTGTCTATATACTGTATTTACCAAATCTTAATTTTAGTCAA  
CATTAAATGTTACTTTTCGTATTTAAGGATGTGTATACTAAGCCTTGGGAAAATGCGTGTTCCTTGTGCCA  
TCCGAAAGCTACTTCATAAAAAAGATACTGTTCAATTTTCAAGCCCGCATAGTTGGATCAAATATTAATA  
TATATCAACATGGTCCAAAG

>Negative Sample 55

AAAGATCGTAAGTTTGGTCTAATGTTGTTTTAGCAAAAAAATACTATAACCTTTCATTAACGTTTTATTG  
AATTTCTTGAAAAAAAACCCTAAATTATTATAAAATTATAGCAGGATAGTTCTTAGTGGAAGATATTA  
GCAAACATTTTTCTGAATTGCTATGCGAAATTTCTCTAATGCCAGCTGAGTAACTAACTCTCATGGTACA  
TAAAAATACGCATCTTAAAAAATTTGATATTTTATGATTTTATTTATAGAAATAACGATGCTTATTGTGCT  
TTGTTGGGTGTTTACTTCT

>Negative Sample 56

ATCCTCTTTTTACCCGATTATTTTCATTTATTAGTAAGTGGGGTCTGGGTGAAAAAATCAAAAACAAA  
ATATGAATTTGTAATGATTTTTTATATTTTCGCCGGAGGTGCTGGAAATGGCAAACGAAAATACTATGACA  
TAAAAGCTGGGCACACTATGTACGTTCTTTTTAATTTTTTATCAACATGAGAAAAATTCATGAACACTGT  
ACCTTATATTATCTAATAAATGAAGTAAGCTTTCATCTCCGTAACAGCTGCATATATATAATTAAGCGG  
GAGCTTTCTTTCGATCTCTT

>Negative Sample 57

TTAAGGACTCTTTGATGGTGAACGAATTACTACTTTGCAGCAGGTAATTCTCTAAAACCTCAGAAACAAGG  
CATGTATTTTTACTAGGAAAAAGAAGGAAAATGGGACTACAGTATTAGGGAAACAGGATTAATAATTCGT  
AGGTAATAATAACCCATACTTTCATTGTAGCAGTACTTTCGTTAATAAAATGGATATTGTTGTACTTCGG  
TAGATGTTATATTCTAAAGAGTTAAATTATCCAATTCCAAATTCAGGGACGGTTTCCAAAGATTTGTAT  
TGTCCAGTGACATAATTTTC

>Negative Sample 58

CACCAAATCTGGGATAACCGTTAATTTCTCCTCAGGTTTGCCTAGTGGATCCTCTCCTTCTGGAGTTTG  
GCCACGCTCTGGCTTTTCGATCAGACTTGGCATGTGACTAATCAAGTATGGCATGCTGGTTTTTGGGTCC  
TTTGTTCGTTGTTTCAGTCTGGATAAATTTAAGTTACCATTATCGAAGGCACCTTTGTACTTGTAC  
TAATTAAGATGCAATGTCAGCGGGGATACTCATTTTTATTTTAAATTTTACTTTTCTGTTTGTCTAAA  
ATCTATCTAAAACCTGGCTTTC

>Negative Sample 59

TTTCTTTAATGATGGTTTGGACGACGGATTGGATGTCGTTGATAGTAATTTACCAGGTAACCTCCGGTTT  
CAAAGCGTAAATAGTACGACGAGCAGTTAAAGTTTTCAAATAAGTTGCAACAGCAGACATGATATTGGAT  
TGTTTTTTGTATATATGTTGATATAGGATACTTCAGTCTACGAAAAAAGTACAAATTATGTAGTCAGTT  
CCTTCAGTATGGTGTCTTATATACTGTAGTTTGGACAAGGTGCAAATGCCAAGACCCTAGCCCGAAAAG  
CTCGAGGCACCCAGGATCT

>Negative Sample 60

GCTGAGCCGTTTAGTTGCACAAACAAGCACATTAGACTTCTATGTGGTTTTGACGTTGTTTCAATATTTT  
GCTGTGCTTTGTGCTTTTGGCAGCATCATAGGACTCATCTTTGGATTTATATTGGGTGTGTTCCACTCAA  
TCTGCGGGGTACCCAGTGTATACATAAGTCTAGAATGGAACGGTGGTTTGCTCCGATACGTACGGTCTT  
TGAACGTGCTTCCACTAGTATTGTCAACATTATGCGAGGACAAACTATTGCGCCAATACCCATGCCTAAG  
CCCAATCCCACGCATATATC

>Negative Sample 61

AATACTCTATGATAGTGCATAACACTAAAAAGTTGAAAGAATCCCGTATCATGGACGATTTTCCTTGAACA  
TTTGAGCAAAGACGATAACAAAGCATGGTATGGCGCGGAAGAAACCGAGAGAGCTGCAAAATTAGATGCA  
ATAGAAACACTACTTATTACAGATAGTGTACTAAAAAGGAACGACGTGAAAAACGTGAAAAATACCTAG  
ACCTAATAGAGAATAGTGGAAACAACAATGGCAAAATATTCGTA CTACTCAGTACTTCAAAAATCACAGTGAG  
CAACTTGACAAACCAACAGA

>Negative Sample 62

ACCTTTGGCTTCCTTTTTGTAATGCCTCACCTGCTCTTTGAAGA ACTTTATAACGACGTTCTTCCATGTCA  
TACTCTTTATCAATGGTCTTGTGACATTCTTAATTATCACACTGTGACCAGCTCTGTTGATAGCTTTCT  
TAAAACCTTCCCAACTCATCTTGTATCAGCTTTCTTCTGGCTTCTTATAATAGGATTTGTATAGTTTTCT  
ATATCACAGCGTTTTCCTTTTCTTCTCACGTCTGCCTGTTATTAATTTGTTTTCCCTTTCTTTTAATT  
CGGATTCTCATAATTGTTCA

>Negative Sample 63

CGATAGCACTCTCGTGGAGTGATGGGGTTTTGCTATGTTAATCATCAGAATTA AAAAAAATGGCAAACACC  
AGCGAGCCAAACAATGTGCGAAATATTATTTAAAAGGCACTTTGGAATGAAATCCCGTTCCAAAAGAAA  
GTTTATTCTCATCAACAAGTTCAGTATCAATGGGTTGACCATTTCGCGTCTAATTCATATAGCGGTATACC  
CCTTCTAAAGTTAGAACCATCCCTACTATCTTTCGCGTCGCCAATCACTATGGGATTGTTTGTCCACTTC  
AGTCTATTCTTATAAAACCA

>Negative Sample 64

CTATTTATGACCCGAAACAGTTGTGTGAAATTTTTCCAGAGGGCAAGGAGGAAGAAGAGTATGTTGTTTT  
TCAACACGAAATTCCTGATCCTCTTTCATTATTAATGGATACATGCGAACAGGCCGAATTTTCAGATC  
GTATATAACCCCTCACCTTTCAAGGCCATGCCTAAGAAAGATTGGGAGTTGGTAGACCTTTTGGTCGTTA  
ATGAAATTGAGGGTCTTCAAATCGTGGAAGTGATTTGATAATGAACTTGTTGAAGAAATAAGGGAGAA  
GATAAAGGACGACTTTTTAG

>Negative Sample 65

ATTTCTTACGTATAAAATTCTTATTGAAAGAGGTGGTTTTCCCTTGAGGAGATAACTCGTCTAACTCAAT  
TGTTTCCTCGTTAATATTGTTCCCATCTATGGCCTTTTCGTCGGAGTCTCCCCTTTTGCTTCTGAAGGT  
GTTTTAGAACCAAAGAGCTTACGCTTGAGTTTATGTGTAATCTTCTTTTCGATGAAGATGGTTCTCCTG  
CAGCTATGTTGCTTTCTATATCAGCGATTGGACCTGGAGTCTGAGAGTCAGCGTCATCGTTTAAGTCACC  
GGTTGGCGTTTCTTGTTCA

>Negative Sample 66

TCATCTTGAACTTGCCTTATACCCAGTTCTATAACCATCCTCTTCTTCTTTTCTTTGTTACATATTCCTATATATA  
ATATGGGTACCCAGACCCATATACCCATTTCGTTGAAAAAATTCTCTAATTTACTTTTATTA ACTCTTTC  
GCAAACATGTTGAAAATGCGATGAAGTCAACGAATTATTCGGTAAATCACCCAGACATAGCTTGAAGGAAA  
ATTTTAGGTAATACTCGAGACATACCCGAAAGATCGTTCTGTTTTAGTCATCCTTCTGTCAAGTATGTGTA  
GTATCATCGGTGCCTTCAAT

>Negative Sample 67

CGTGATCGTCATCCATTGAGCTTTTCTTCTCTCTTTTTTTTTTTCTTGTACATATTCCTATATATA  
TGTATATATATCTATATATATATATATCCAGCGTATATGACTGCACAAGACGCAATTTTCTTGAACGGT  
TTTTTCTTTTCAGCACTGCGAAAGAGAGAGCAACGGTAAAGAGCATGAGCCAATTTGAAAAGCAGAAGGA  
ACAGGGCAATTTCTTGTCAAACAGGGCTGTATCGCGAGGCTGTGCACTGTTATGACCAACTAATTACT  
GCTCAACCGCAGAACCCGGT

>Negative Sample 68

CAACTTCATTTAATTTCCCGTATATATTATATGTACGTATATATGCTATAAACAGACACTCTTTTTACTT  
ACCTTTAATAATGCTTGATGAGAAATCAGTCATTGTTACTTCTTCCCAAGGTTGTCATCATAATCATA  
CATTCAATATCCTCTAGTTGGCATGACATTACTTTCCCGAACTTAGAGAACTTCAAACGTTATGGTGT



CGGGATAAAATTTGATTAATTCACAACCTCTGCAATCAAGGCTTAAAGGAATGAAAGAATCTTCTTTGAC  
CTTCGATAAACCATGCTTCT

>Negative Sample 69

TGATAACCCAAAAGCATAATACGAGTAATGTTTTAGTATTGCTATTATATGTTTTACACAAGGAAAACATA  
TAATAACAAACCTCTAATCCGGTAGTACTTAAGAACTATAGTTTCTATGTACAAAAAGGTAACCTATGTA  
ATTCTTACATTTACATAACATATAGAAGGGTCCAATAAACTTACTAACTTACTACCTTGTGTATATAG  
GCTAGATCGTAATCCACTACGTCAACATAAAAAAACTTAAGGAGTTTGAATTTTATGTACAAACAGATT  
GTTAAAATATAATATAAGAT

>Negative Sample 70

TCCTTATATCAAAGAAAATCAAGAAGGACAACATGGATGATATTTGTAGTATGGCGGAAAACATAAACAG  
AACTCTGTTTAAACATTCTAGGTACTGAGATTGATGAAATCAATCTCAATACTAATAATCTTTATAATGTA  
TGTTTTTCATTTCAAGGATAGCCTTTGAATCAATTTACTAACAATACTTCAGTTTATAATGGAAAAGTAATT  
TGACTAAAGTAGAGCAACATACATTACACAAAAATATTTCTAACAATAGGTTAGAAAATATACCACCACAT  
TAAAAAAGAGAAGAGCCCAA

>Negative Sample 71

TACTGCTATTGCTATTGCCTATGTTTCGCTCTAAGGCGAAAAATTTTTTCCGTCGGTTGAAGGAGGAAAA  
ATTGAGGATCTCAAAGAGAACATTAAGGCTCTCAGTATCGATCTAACGCCAGACAATATAAAAATACTTAG  
AAAGTATAGTTCCTTTTTGACATCGGATTTCTAATAATTTTATCGTGTTAAATTCCTTGACTCAAAAATA  
TGGTACGAATAATGTTTAGATAATTTTCAGTAATCAACTACGCAAGTAAAGCAGTAAATACGTTACTGC  
TGGTATTAATGTCATGTATT

>Negative Sample 72

CAAGTACTTTTCAATATAAATAATTTTCAGTTAATTAACAGAGTAGGAAGAGGAAGGAACAAAACTAT  
CGCTTATCTTCTTGCATAGGGGTAGTGGAGTAAAGATACAAGTATTCGAGAAATAGATATACATTAATAAT  
AGCATTACTATCCCGGAATCTTGTTGCCATAAGGTGCTTTTATGATATCAAACCAGGGGGGAGAATATT  
TGGGAAGTAATTGGGAAGTAATTGTATGTATTTCTAAAATTTTTGGATACTCAACTTTTAAATTCAAAT  
AGTTATATTTGTTATCGAAA

>Negative Sample 73

AAGTGCGGTAGCAAGGGCTATATTAATCAAACCTATACGCCGACAGAAATTTATAATTGTGGGGTAGCTG  
AAGGAAAGAAAAGTCTAAAGAAAAGAACCCAACTTATTCAATTTTTTATGATACATTTCTCACTGGGCA  
GCCTGCTGAAAGTCTGAAACGTTTACGTGTGGTTTCGCATGGCTTCACAAATGCGAGTTATGTGGCAAGC  
GACTTTTATGCATGTGGTTTTCTGCAAGGGAAAGGTACAGAAACCAATGCGGGAATACATAATACAAGGC  
CTTCTCATTCTCTCGCCAAA

>Negative Sample 74

ACTATCTCTAACGCTGTTGGTAGATTGTCTTCTGAAGAAATTGAAAAGATGGTTAACCAAGCTGAAGAGT  
TCAAGGCTGCCGATGAAGCTTTTGCCAAGAAGCACGAAGCTAGACAAAGATTGGAATCCTACGTTGCCTC  
CATCGAACAACTGTCACTGACCCAGTCTTGTCTTCTAAATTGAAGAGAGGTTCCAAGTCCAAGATTGAA  
GCTGCTTTGTCCGATGCTTTGGCTGCTTTGCAAATCGAAGACCCATCTGCTGATGAATTGAGAAAGGCTG  
AAGTTGGTTTTGAAGAGAGTT

>Negative Sample 75

TCGTTAGGAAAAAATGGGCCATTGCATTTATGTCATTGATCGCATTCTGTCAATTTCTAATGGGTGCTT  
CCATTACCACAGCTGTTTCTAGACAAGTTTGGGCATTTTCCCGTGATAACGGTTTGGCCCTATCAAAGTA  
TATTAAGAGAGTGGATTCTAAATACTCGGTCCCTTTTTTCGCTATTTGGCTGCCTGTGTAGGTTCCCTG  
ATTTTAGGATTGTTATGTTTATTGATTGATGATGCCGCCACTGATGCATTATTTAGTCTGGCTGTTGCAGAA  
ACAATTTGGCATGGAGTACC

>Negative Sample 76

CCAGGATATGGATTGGTCCAAATTGTACCCTTACTACAAAAACGCGGAAAATGGACAAATGACAAAGAAG  
GTGACGATTGCTGATATTGGCTGTGGATTTCGGTGGGTTGATGATAGATTTATCACCAGCCTTCCCTGAAG  
ATCTTATCTTAGGGATGAAAATTCGTGTGCAGGTTACAAATTACGTGGAGGATAGAATTATTGCCTTAAG  
GAACAATACAGCTTCAAACATGGATTTCAAACATTAATGTCTTGAGAGGTAACGCTATGAAATTTCTTG  
CCCAACTTTTTTGAAGAGGG

>Negative Sample 77

AAGAAGAGGAACAAACAATTACAAAGATGCCTATAGAGGCCAAAGTCGTCGGAATAAAGAAAACGGCGGT  
TACCAATCGGGATATTCTTCGCCATATCTTGTGTATCCTCCTCCCAAATGGGTGGCAATAGTCTGCCAA  
CCTACCCTCTAATGTATAACCCCGCTGGTCCTGCCCCGGTCCTGCACCTTCACCCATGGTAATGGGCAA  
TAACACAGTCTTCATGAACCCTTACATGTACAATATGAATCCCCAAGGGTCCTGTTTCGTTTGGCACCCCA  
ATCCCTATGTATCCCCATA

>Negative Sample 78

GAAAATACACAAAATACTACTAAAAGCTTCACACCGATAAAGAGATTTATTGCATTTAGCACGGCATAACC  
AGTTGGTCACCGGTTTATTGTTAATGATATTGGTAGTTGGTAGTAATATCATGTTGACAATTGGGGAATC  
ATTGATTCTGTGCATGTATTTTCGTCTATGTTTCGCGGCCATGAAGGATTATTTACTCCCCTGGTGAACCTAC  
TTCGGCTCAAGAACCATTTCAAATTTTCATCTTATGCGTAATAATTCCTTTCATATCTCTAAACTTCCTCA  
TCAACACTTCGATATATTTA

>Negative Sample 79

TTCAATTCGTTGTTAAGTACTGGCTGATTGTGAATTTTATATATCATGATATTTTGAATTTCAATACAA  
CGTCCTTCCCGATCGAACAATACGAGAAATTCCTCAAAGGGATCAGAACTCTTTACCCAGCTCAGCCAA  
CTTTATTGAGTCAATAGACTCGCCAATTGAGGAAATAGACCCTTTAATTGGCATCAACAAGCCTATTTTA  
CTACTATTGGGACAAGTCACAAATTTGACGAGGTTTTTGCAGACTATGGAACAGGAAGAAATGCTAGAGC  
ATGGCGATAAAATTTTGGAGT

>Negative Sample 80

TATATACACATGACCATTTCTTTTCAGCAATTGGCCGTGAAATTCATCGTCCTTTTTGGTCTTCCGTTTT  
TCGATATTTGGCGGATATACTCGATGAACAGGATTGCAATCGCTATGTTTTTCGTATTTTGGACTCACTCT  
TCTTGCCGACTCTTTCAATAGTCCTTTAAGGCACCATGGAGATTTTTCAGGCTTCTTCTTTTAGAAAT  
TTTCTTATTGGTTTTTCATCCTTCTGTTAATTTGTAGTGGAGGCGTCGATATGCTGTATCCCACTTTTTGT  
TTATATATCATCTGATCCAT

>Negative Sample 81

AGACCACTTCTTGAACGACCTTTAAAGCGTAAACTGTCATTGCCAGGACTAGCGCAAAGACCATTATCCA  
CTGGCGCTAGGCTAGAAGGAGGATATGGAGGTGTATCGCCGAACTCATGGAAAACCAAAGTTCCAAAACCT  
TCCTCTTCTGCTTCCCGGCCGTCTTTGAATCTTTCTCCCAAAAAGTCCCAACGGGTACTGATAAAGTT  
GAGGAAGATACCAAATTTGACACATTGGAATTAGTAGAGAACAATAAACCGCATCCAAGGATGAGAAGAA  
GGAGTGACAATCCAGCAACA

>Negative Sample 82

CTATTAGAATATTTTGGATTGGGACGTCACCATTTCCACAGATGATTTAATTACATGTCTCTCGCCATTCT  
TGAAGCCTATCAAAGAGGAGCAGTTGTACAAATCGCAAAGAGACTGTCGCACGTTGAAAATTTTTCTGC  
TCAAGAAAAGACATAGTAAACAAAACATCCATTTCCCATTCGCGCTCATCGTCCAATATGTCTATCCCA  
TCTTTAGCTTCCACTTCGACCCTCTCCACGTTGGAATCTAGAAGATCGAATTTATCCAATTATAGTAACA  
GAATACGAACTTTGCCCGAA

>Negative Sample 83

GCGTAAAGGCTCTCGAACAATTTATGGAGAGAAATAATATTGGAGAAATATGCAAGAATTATGAATTAGA  
GAAAATAGCCGATAACATATCAAAGGATGAAAATGAAGATCAGTTTTTGGAAAGAAATAACTCAATATGAG  
CATTTGATAAAGGGCATAAGAGAATATGAAGAATGGCAAAAATCCGTTAGCTTGTTAAGCTCTGAATCGA  
ACATTCCTACTTTAATAGAGAAATTGCAAGGTTTTTCAAAGGATACATTTGAATTGATCAAGACATTTTT  
AGTAGATTTAACTTCCTCTA

>Negative Sample 84

AACAAATCATCTCTAGTTAAACCGGGCTTTCTGGGAACACCAGCCGGTATTAGCACACCTGAGCATTG  
ACAAGGTGTTCTCAATACTATCCTTATCATAACCGACACAACCTTGAGTTGGTGTGATGTGAGATAAATC  
CTTACCAATGCCTTCCGCAGCTCGGATATCGTACAACGCCAGCTCGGAAACGTAAGGGCTTAATTTTAGC  
AGTAATGATAGCGTTGTCCACGCCACCAGAAGCGCCAAGAATTGCGACTTTGACCATGTTTATGATTG  
TTTGTCTCTTTTTATTTCT

>Negative Sample 85

AGTATCAAGCTCAATAGGAGGGAGAATATATTGATAGGTCCACCAGAGTTGAGATTTTCTAATGAAATCA  
AGGAACACAATAGTATTGCTACAATATTCAAACCTGGTATTTATTCAAACCAATAGAAGAGTCGTCGAAAA  
AATAGATTTGGCGAACATGAAATGGGGGACAATCCACGGAGGCAGTAAGTACATGAAGCCTTTACCCGTC

CCGAAAGATTTGGTTGCGAGTGTGCTAAGAACGAAAGTGAGACGAGAACTTAGCTACCTTATGCGGTA  
ATGGTCTAGATTTTGAGATA

>Negative Sample 86

AATGGAAACCATAAGGAAATCAGATGAAAAATTAGAACAGTCGAAAAAAGTGCTGAGGAGGATATTA  
AACTTGCAACATGAGAAGTCAGATTTGATATCCCGAATCAACGAATCTGAAAAGGATATTGAAGAACTGA  
AAAGTAAACTGAGGATCGAAGCAAAATCTGGCTCTGAACTAGAAACCGTAAAACAAGAGCTAAATAACGC  
ACAAGAAAAATAAGGATCAACGCAGAAGAAAATACAGTTTTGAAATCTAAATTAGAAGATATAGAACGT  
GAACTCAAAGACAAGCAAGC

>Negative Sample 87

AGTAGCTTTTCCCCTTATAGATGTACGCCGTTTCGATATTACCCGAACTGCAAGAAAAGCTTCTCCAAATA  
TCTACTGGCCTCCATTCAAGAAGGCAATTAAGAGACTATGTGTACATGAATGGGAACTTGGTATGATGG  
TAGTAATGCTTTATTAGTCATTCCCCTACCCCTTTCGCAACCTATCATTTACTTGCCAGATGTGCTCT  
CCACTGTTAGAGCCTCTTCGCTGACAAAGAATGGACGAGTACGCGAGCGGTGAAACGAGCACTGCAGGCA  
AGAGAAAGAAAAATCATGCA

>Negative Sample 88

CCATTGTTGCTAAAGGCTATAATATTGGTATACAGAATATACTAGAAGTTCTCCTCGAGGATATAGGAAT  
CCACAAAAGGGAATCGATAGTTCTACATAATGTTATTATTTTATCTTCTTTCTTTTATGCGTTGTCATT  
CATTATCCTATTACATTATCAATCCTTGCATTTTCAGCTTCCATTAGATCGGATGACTGTTTCTCAATCTT  
TATGTCATCTTCTTACACCCGCATGTGATAATATAATATTAATAGATGATATTAGAGTTCAATTCCAACA  
ATTTTCATTCTAGATAGCGG

>Negative Sample 89

CTTGAGTATGTCTGTTATTAATTTACAGGTAGTTCTGGTCCATTGGTGAAAGTTTTCGGCTTGCAGAG  
CACAGAGGCCGAGAATGTGCTCTAGATTCCGATGCTGACTTGCTGGGTATTATATGTGTGCCCAATAGA  
AAGAGAACAATTGACCCGGTTATTGCAAGGAAAATTTCAAGTCTTGTAAGCATATAAAAATAGTTAAG  
GCACTCCGAAATACTTGGTTGGCGTGTTCGTAATCAACCTAAGGAGGATGTTTTGGCTCTGGTCAATGA  
TTACGGCATTGATATCGTCC

>Negative Sample 90

TTGTCTTGGAATAACAACCTCTTATAATTTGTAAGGGGCCCTTGCACCTCGCGTTTAAAGTCCATAGAAAC  
CAAATATTTGTTAAAGCTTCTCATCCTTTTGGCAGTTCTACTTAAAAATATAAACTTAAAATTTTCGC  
ATGCCAAATCCCAGTAATGGTATGTACTGCAGAGCTTCTTTCAGGATGATATAAACGTTACCACCCAAAT  
TTGAAACAAAGGAAAGCCACCAGAGATAAATCCAGTCTGCATACATTTGATGATTTGCAATTATTATAGC  
CCTGTCTTTAAATCTAAAGC

>Negative Sample 91

GAATATATTATTCGACGATATTTAATTATATGAGAAAAACAGTAAAAAGAATAAGGCCAAATGCATTGAT  
CGTTTTGCCGCTCGTTGACGTTTATATATATTTTATTGTTGTCCAGAGAGTAACTGTACTCAATTGTGGG  
AAAGGGGTTGCTAACGAAGCCAAGGCTTGCCAATACACTGCGCAGGTGCAGCCCCGAGAATTATTAATT  
TTTTACTAAGACAGTCAAGAGACGGGTAAGCGATCGCAATGAGCGGCAATAGGAAAAATTAATAATGAAT  
CAGTCAGCGTCGCAAAAGCC

>Negative Sample 92

ACTTTCGGTTAAAGCCTGAGAGTAAATATTCCTTAACCCCTACCATGTTACATTATGCATCGCAGCAAGG  
GATGAAACAGATGGCACTGATTTTGCTCTCAAATATTAATGCGATCCAACGATCAAGAACAGACTAGGA  
AGGACTGCGTGGGATTTGAATAGAAACGACGACGTGAGACACGCGTTTCAAATTGCAAGATACAATCTTG  
GAGAGTCTTTCATAATTGGGACGAAACTCATATCGGTTCAGCCATTGAGCAGAGAACAAGTTGATGAAAT  
CAATGAAAAGAAAAAAGCAA

>Negative Sample 93

TGCCATAAACAAAATGCTTAGTTTTGAGATTAGTATCGTTACCTAATGGACATATTCTCCAGCCTGGTGAC  
TCATGTGTTTGGTTGGCGGAAGTGGTTGATATGAAAGATCGGTTTCAAACCACTTTATCGTTGAACATAC  
TTAATTCACAGAGAGCAGAGATTTTTTCAACAAGACGTTTACATTTAATGAAGATAATGGAACTTCTCT  
ATCATAAAAATTTGGGGATCATGGCGAGTCAACTGAACTTGGTCAAATAACCCACTCAAACAAAGCAGAT  
ATAAATACCGCAGAAATTCG

>Negative Sample 94

TTTGGTTTACATTTATCAGCGCTAACGATAGCGATACGACTGTTTTTATCACTCATTATGGTCTGTCGTG  
TTTTCTTAAGAACTTTTGCAGAAGGCTAGGTGGAATTCGCGCTGAAACAGATCACAATGAAGATCTAAGA  
ATACAGAAACAATAAAGGTTAATGCCAGTTTTACATTTTTTTTTTTTCACTTTCACTTTGCTAGCGAGC  
GATGCGATTGAGAAAAAAATAGAAAATTTTTTCAGTTGCAAACTACCCGGCTAGAAATCTGGTTCGAT  
GCACACGAGTAACAAGAGAT

>Negative Sample 95

GGTGTAAGCAATCCACTCATGTATTCTTCCACAATCAACGATTATTCAAACGGTACTGGAATTCGCCAAA  
ATAGTAATAATATTAATCCCTTAGATGCAGGTCCATCTTTTTCTCCTCTCCACAAAAACCCAAAATACT  
CAACGGTAATGATAATAGCAATCTGGACAGTAATAATTTTGATTACAGTTTCACGGGTAACAAGCAAGAA  
TCTAATCCATCAATCTTGAACAATAATACTAATAATAATGATAACTATCGTACATCTTCAATGAACAATA  
ACGGCAACAATTATCAAGCG

>Negative Sample 96

GAGTATAAATTCGGATGTGCTTGGACAGACCTGGATAATTTCTGAAAAAGACATTGAAGATGCGGCAT  
AGCCATGTATCAGCAATGTTGGTGTTCGAACAGTACTTGTGTTTTTCAATTTGGAAATGCCATTGATTTAT  
TTCGTTGAATAACTTATCATTCTTTTAATACCTTCAACGTGTACCTCTTCCATAATACGTCTCTGTAAT  
TCCTCCAGCCGCATATAAGTTTTGTGTGGGTATTCAAATGGCTTGACCATAGCTTGAATCCAGATTTTT  
TGACAGCATTTTCTCCTTG

>Negative Sample 97

TCGGCAATATTCAAACAAACAGAGCCTGCCATACCCATATCGGAAAATATATCTACCAAACACCAGCAC  
CGGTAGCTTATAGATCCAACAGACCTACAATAACTGGAGGTTCTGCTATGAATGCCAGTGCTTTGAATAC  
ACCAGCAACAATAAATTACCACCCTATGAAATGGATACTCAGAGAGTTATGTCAAAGCGTAAATTAAGA  
GAGTTAGTGAAGACTGTCGGAATTGATGAGGGTGACGGTGAAACTGTCATTGACGGTGATGTTGAGGAAT  
TACTATTGGATCTTGCCGAC

>Negative Sample 98

TAAAGATAGTATGATAAATCTGGGCTAAAAATGGTATTTTTGCCATAACGACTTACAGCATGGTAATTTA  
CTTTTTAAAAGTAAGGGTAAGGATGACATCTCAGTGGGCGATTTAACAATTATTGACTTTGAGTACGCAG  
GCCCTAACCCCGTTGTATTTGATTTATCAAATCATTGAATGAATGGATGCAAGACTATAATGATGTGCA  
GTCTTTCAAGTCTCATATTGATAAGTATCCAAAAGAAGAAGATATTTTAGTTTTGCACAAAGTTATATA  
AATCACATGAATGAGAACCA

>Negative Sample 99

AAATGGTATAACTCCATGCTATACAACCACAGCGAATTCCCGAGCACATGGAGTCGCTGAACGGCTGAAC  
CGTACCTTATTAGATGACTGCCGTAATCAACTGCAATGTAGTGGTTTACCGAACCATTTATGGTTCTCTG  
CAATCGAATTTTCTACTATTGTGAGAAATCACTAGCTTACCTAAAAGCAAAAAATCTCAAAATCCCA  
ATATTCACATAGTCTAAAGTACCGATAGCAACCAACATATATAAACAGTAGTATTTACGAAGCTGAATT  
GCAAGATTAGTGAGAGGAGA

>Negative Sample 100

GATTGATTATTCGTCGTTCCGAATGCGCTACTGCCACGTTATTGTTGTTGTTAGCTTTGGAGGTTGTAG  
TACCAAACGGCGAAGAACCAGCGCCTGCTCCGCTCTGTAGATTACTAAAAGGTGATTTGTTATTACTATT  
AGTTCCAAATGTGCCAAATGGGATACTCCTGTCCACTGCTTGTACTTGTATTTGAATAGTACCAAAT  
GGCGACTGGGTATTAGTAGCTGCGCCGAAAGTCGGTTTGCCAAACGCTGACGATGTAGATGATGATTTT  
GTGATGCGTTTTGTTGCAGT

>Negative Sample 101

CTCTCGTCAAGTAATCCAGAGATTTTTGAAATATCTCACTTGTATTCATAAACTTGACAGGATTTGGAT  
TTGCTTTGGGACTTCCCTTCGATTATGTTTGTGCTATTTACCTTGTTTTCCAACGGATCAACGGGAACATT  
CATTTGTTTCATGTCGCCATCAGCCAAGGGAGAATGCAGTGCTTCCCTTTATAGCGCTTTGGGTGACTCGA  
TCTGGAGAGCTTTTCCATTGAACTAACTGGCCTGACATAGCCCTGATGTTGAAGATTTTCTCACTATGCT  
CTTTTCTATGGCGTTTCTCT

>Negative Sample 102

TTGGCCATAAAGCTTGCGAAATATTGGATTCTAAAAGAATTGGAATAAAAGTACCAAAGTTATACGTTTG  
GTCTTTAAGTGATAAACCGTTTGTGTTATCGATGGGTTGTGCACAAAATCGCTGTACCCATTGAGTGAT  
GACATAAATACTCCTGAAAGTTTGTGCTCATGCTCAAGCTCAGTAAGTTACGGGAAAATCAAAAAGGAG

ATGCAACATTTGATAATGATGCTATGATAGCCGACCTTCTAAACATAGGCGGACTCGAAGTAGAGAAGGC  
ATCCAATGGCCATATTGAGC

>Negative Sample 103

GGAAGCACGCATCAGAAAACATCTCACTCTCTTTCTCAAGACCTGCGTCCTACGGCTATTTTTCTGTTGG  
AAAAAGGGTTCCAATCGTTGAAGATCGTCGAGTGAAACAACCTCGACGATATAACAGACAGTAATACAACA  
GAAATTTAACTAGTGTGACGTTTTAGGAACACATTCACAACTGGTACTCAACAATCAAATATGTACA  
CATCAACCCAAAAAACAGAACTTGAAATTGATAATAAGGATAGTGTACCCGAATGTTCGAAGGACATGAA  
AGAAGATGGTCTTTCCTTTG

>Negative Sample 104

ATCACTCCCAAGGTGCTCATTGATTTATATGCAAAATCAAATGTGCAGCTTTAAAACCACTAGATTTCG  
TCTTTAGAACTTGCTGAAGGCTTTTGGTGGATTTACCACTAGCCGATGTACTAAAGGAAAATTTATCAT  
CCCCATCATCCAGATTGGAAGAAAATCTTTTAGATGATCTGATTGTACTAAATTTCCGTTACTTGCTTT  
ATTTACTTCTTCATTATCCACAATAAGTGGTTTTACGTAGCTTAAGGAACTCTCCGCGCTGACATTTCTC  
AAAATGGGAGCTTCCATGAC

>Negative Sample 105

ATATTCCATGTCTACGGTAGTTTCACTGGAGAAATGGACTCGTATTTTTCTCTCACGATGAATTTTTCCAC  
AAAATTATAAGATGAGGAAATGTGTGGGGCAGTCATCCTAACAAAACCTCGCACGGACTCCATTTCCCCGG  
ACTTTTTTCCCGCTTGTTCTAGGGAATAATTTCCGAATAATTTAGGGACTTCATAGTATGACTGGGTTT  
CAAGGAACGGAAAAACTGGTTAGTACCGCGTTATTCTGCCATTTGCTGATCGTTTTAGTGGAGGAGCGGA  
GGAGGGGGCGGGGTGATAAC

>Negative Sample 106

CGACCAAACATCTTCGCTAAGCTGAGAGTCAGAGATGTAGATTGATTTCTTCCGCTAATACTGTTGTGCG  
AGAATTCATCCAAGTGTAGACGTGGGTTCTTCTATAGAGGGAGATGATACCTTCAAAAAACCCACAA  
AATTTCTACCGAACAAGAACTGATTACAAGTATGAGCCTTAGTCAGAGAAACCATGGTTATTCTGATGAT  
ATGGAAATAGGTTACCAAAAAAACAACATCAACAGACCAATACAACAGAATTTAAAAAATGATGTTG  
CCGCAATTGAAAATGATACT

>Negative Sample 107

GACTCACAGAGAGCAAATCATTCTTTTTACCTTTGCCACCATGAAGACTGTGCGATGACCACTGTGGGTAT  
GCTTTGCCACTTGACCCATTCCAATGGCTTTTCCCTAATAACGCTGTCTATCACGATATCCACCACCAGC  
AATTTGGTATCAAGACGAACTTTGCTCAACCATTTTTCACTTTCTGGGACAATTTGTTCCAAACTAATT  
TAAAGGGTTTGAAGAATATCAAAAAGAAGCAAAGACGTGTCACCATCGACAAGTACAAAGAGTTTTTGCAA  
GAGAGAGAATTGAAAAGAA

>Negative Sample 108

TGGATTCTTTAATGTTAGACAAGGCTATTTAGGAAATTTGTCAACAATGAAATTCACTACTATTATCC  
TCCTGTGAAACCGCAAGGTTGCCACAAATCAAACCTGAGAGTGGACGGTAAGCATTTTAAATTACCAGAG  
GTTTGCATTTATATGCTACCAAGCCTTTCCGCCAGCTATAGTCAACTTAGTGGCAGATAAGTATGATG  
GTATTGTTCTTGCTACCATGGGTGCTGGTTCATTGCCGGAGGAGGTCAATGAAACCTGCATGAAATTGAG  
TTTGCCGATCGTATATTCCA

>Negative Sample 109

CCAAGATGCTGAAGAGATTGCTTCTGAAGATATTGCAGATGCATTCCAGCAAATGTACGAAAAGAAAAGA  
TACAATGAAATCTTCTTTATGATAGATACATGTCAGGCAAACACAATGTATTCCAAGTTTTATTCTCAA  
ATATTCTGGCTGTAGGCTCTAGTGAATGGATGAAAGCTCGTACTCGCATCACTCGGACGTAGAAATAGG  
GGTTGCTGTTATTGATAGATTACCTATTACTGTTTGGATTTCTTAGAACAAATCGATAAAAATTCACG  
TTAACTTTGCAGGACCTCTT

>Negative Sample 110

CTACTGAAGCCACTCTTAAAGCATGATTTTTTCTTCTGCCATCTAAAGGTTACTTACGGCAACCTTT  
CCATAAATTGTTGCTGAAATAACATATAATAGTACCAAATGGGCCTATCAATAAGTTTACAGCCTACAAG  
ATTTTCTTCCACTAAAATATATTCGAATAGGACTTTGGCCAAAAACTGTTCAATTAAGGGCAGACTGTTT  
ATGTTTTCTCGCAAATTACCTTTTTAACAAAGGTGAAATATTTTTTTTTGGGGAATGCTAACTGTTTATCA  
TCTGCCAGGAAAGAAAACCTT

>Negative Sample 111

GCTGTCTGCGATGACGAATAGGAAAGAAAAAATTTTCCTTAATTTTGCTTGCTTAATTCTTATACGAATA  
ATTCTTCTTAATCAACATCGGGCTTCATATTTACCAACACGCATTATTGATTAACAATACTTGCCTTAGG  
TTGAAATTGGACGCCGGAAGAGAATTTATAGCTAGTCAGTGTCTTCCGGCGTAATTTTATTAATGGACAT  
ACAGTGACTTTTCAAACACTACACCGCCATTTGATATACCGGTGTAATTTTGGATGAAGTGTGAGAATTAG  
CCGCACAGTTAATTGAACAC

>Negative Sample 112

TTCAACTTCCTCTTCGTCTGCTACTTCCATCTGCGGCAGCTTCAACACATCTTCAATTAATCTCTCTATC  
GATGACTCTGAGGTTCCACCCTCAACTCTATTTCTTAGTTCACTTCCAAGAGAGTACTTTGGTATGTCTC  
CAACAAGTTCCATTATCTGCTGCGATTGACTGGCTCTCAATTCAGACTCGTTATCGTATATCTCTTTGCT  
CAGTAAGTCTTGTTTTCCCTGCTCATGGCATCCTTTCTCTTTCAATTACTTGAGCCTTTAGTAATCTG  
CACACTTCATTTGGTAATTC

>Negative Sample 113

AATCTGTCCTAAGTCCGATTTGTCGAGACAGATTTTGATGAAAGGCTGTGATACAGATGCAGGTCGTTTG  
AGAAAGCAGATTGCAATAGAAGGACATCCAAGATTGCATCTGTATAGGGGCTTTTCACGTTTTATGATGG  
AAGATTTATCTCTACTGGAACATTTCCAAAGTTATTCCAGAAAAAAATTCAGAAAATCATTTCAATGAT  
CGCTTTTAAACATGATTAAGAGAAATGACGCGTATTGAACTTAGTGGAATTGATATTCCCTCATCATTTG  
AGAATTTCTATTCATGCGCA

>Negative Sample 114

GCTTCCGTTACTAAGGAAATTTGGGTACTGCTCAATCTGTCGGTTGTCGTGTTGATTTCAAGAACCCTC  
ATGACATCATTGAAGGTATTAACGCTGGTGAAATTGAAATTCAGAAAACTAAGGTTGTTTATAACATCA  
AAAATCCATTCCATATATTATTCTGTACTTTTAATTTAAAAGGCTTTAATCTAACATATAAACCAAATA  
TTTTACTTCACGTTATATTCTTTTTTTTTACTGTTGCAGCAAATTGTAGTCCGGCTGTGTTCAATCAACC  
GTCTACATGTTGAAATAGAT

>Negative Sample 115

ACATACCTAATATTATAGCCTTAATCACAATGGAATCCCAACAATTACATCAAATCCACATTCTCTACA  
TTACTAGTATATTATCATATGCGGTTTAAAGAAAATGGTATAAAGATTAAGAAACAGTCATGAAAATTTAG  
TGAAGCTGAAATGCCAGTATTGATAATACGATAGAATAATGAATGACAAAGTATATAAGGAAGATGAAGT  
AACATTATTATGGAGAACTATCGACTCCCTTTTGTGAATTTCTATATCCTCAAGGAGAATTGCTTGATA  
CTATGTATATATAATATTAT

>Negative Sample 116

CAAAGATGCTGTACCGTTCACGCCGTTTAAACGGTGATAGAGAAGCACACCCAAGGTTTACGTTGAAAGGT  
TCAGTATACAATGACCCATTCATCAAAGATCTTGAGCACAGGAAAGAATTTATTGCGTCTGGGTTCAACA  
CTAATTATGCGTACGAAAGGGTGTGACAGAGGCATTTATGGGCTTAGGATGTGTTATATCCGAGGAGCT  
TTAAAACATCAGGATAGTGTGCAACGTGGCATAAGCTATGTAATCAACTACTTTTTATTTTCTATGTACG  
CATATACATGCATTCACGAT

>Negative Sample 117

ATGAATCTTCTCAAAGTTATCAAATGCGTCAAATCCCCGGGCATGTTGGCTAACTCCAGCACAGCGAC  
TTCTGCATCTGCCAATGAACGACTCCAAGAAAAGCAAACAGAATCATTGTCTAACTACATTACAAAGATG  
AGGCGCCGTGATCTGAAAATTTCTGATATACTGCAGTTTATCCACGGTACCCTATGGTCATATCTTTTTA  
ATCACGTAAGTGATGATTTGGTTAAATCTTCAGAACGTGACAATGAATATATGATAGTAGATAACTTCCC  
CACTTTAACCAATTTATCC

>Negative Sample 118

CCACTGTAATTTTAAATTCGGGGTATTTGTAGGTCATTTCCACAATACTACATTTTCAGTACCGATTGAAA  
TCTGAAACTTTGCTCTCTATAATATTCACCAAATCCTCAAATTCATCTCTTCTTCTTCATCATTGTGTT  
CGTTGGCAATGGCTGCAAACTGTCCTTATTATCATGCTTGCTTTCTCCGCTTTCTTTTCTGCGGGAGAT  
TGCACTTAATTTTGCAAATTTAATAATGCATCTTGCAAACTTCCAGGTCCTGCAAAAATGTCACG  
ACCATAATCTTTAATGGCTT

>Negative Sample 119

AGCTGTTGAACAGTAATCCTTCCAAACATCACTGTCTTTACTAGCTTCTTCTTCTGAACATATCCAGTTA  
GTCAATTTCAAGTTAAGAGTGTACCCGATTTAACTCGAATTTCTGGGCCAAATGTAGCGCTGTAGCCAT  
TTATGGAGATAACTCTTCTTATCAAGCGTGATTTCACTGCTCGCATTGAATTCAGACATGATTTT

GCCTTCCTTAGCGGCCATAATAAATTTTAATAGTATTAAGAGTAGCATTGGCAACTGAACCGGCTTAAGG  
AGAATGACCTTCATTCTAAA

>Negative Sample 120

AAGGGACCTTGTAATTTTGGAGGCTTCCTTTTTGGTAAGTTAGTCATAACTTTCATAGGATCATATTTAG  
ATAATGGGGGTAAGCCCTTGAGTAATCATAGGTGGTGATACCCAAGGACCATATATCTGCTTTCTCATT  
ATACCCATCAACTTCGCAGCAAACAACCTCCGGAGCCATCCAATACGGCGTTCCTACAAAAGTGTCCCTT  
TTCAAAGTGAACGAATGTGGCCACTTACTCCGAAATCACCCAACCTAACCATACTTCTTCATTTAGTA  
AAATATTAGCTGCTTTGATA

>Negative Sample 121

CCTTCTTTTCGGAATGTGTTGAAGGGATGTAAGGCTTCTACAACAAAAACACCGGTCTTGGCGCCGTCAC  
TGTAAGAATACATCGTTATATGAGGTAAGAGCGAGTAAAACCTTTTTTTGGGGCCATTATAAATTTGTTTGA  
GTTTTATCTGTGTAATTAGCCAGTGGGAAGTACTTAAAAATGCCGTTAATAAAATTTAGCGGATGATAAA  
GAAATGAATGGTTCTCCTTATGGCTGTTTATATATCTGATTTAAAGGGTAACGGAAACCGGAAGCAATAA  
TGAACCGTGAAGCCATCCC

>Negative Sample 122

CTGCAACGAGGATATCGTTTGTACTCTTGGGCTCTCGGGGCTTTTTTCGCGTTACTCTTGAGATTTTTTG  
GTGATGATCTGAACTCGCCGCTCACCTGCCACTACGTCTTCCGCATTCCGAGTACTAGAGAATGAACAA  
TGGTAGTCGCTTTCAAGGCCTAACCATGAATCCAGCGCTCGGAAGCTCGTTCCTGCAATAAAGTGGCGG  
TCGTCCCACTGACACTAGTTAACGAAAAGGAATCCACACCGTAAATATTTTCGCCCTGTTTGAACGGAATG  
ATTGGCCATGAGTTCACTCG

>Negative Sample 123

CTGCGCTATGCAGGTGCAGCAAAAAGCAAACAAAATCTCACTAAGATAAGCGACTGTCTGTCCCCTTCAAG  
CACAACATAGAAAACAGAAGGATGTCTCATTTCATCGCTTGATTTCCGGCCTGAAAAATAAAGTAGTCGG  
TACGTACGTTGTTTTCAATTTCCATGGTGCACAGTATCTTAACTATCTGCTTAGTCGAGGAGAACCAGG  
ATTCTGTTGCTGCTCAGCCGCTTCGTGGATATTCTGTTGGATACTTAAACATGGACCTACGTTCCGCT  
CTCGAAAAGACCAATATAAT

>Negative Sample 124

TACTGATATCATTTATGTATTAACATGTCTGAACAATAAGTATCTTTTTAACTGTATAAGAAAGCATGAG  
AATTGTTTCAAAAACCTCTCATTATATATGGAAGGAAATTAGAGAAATATTGTTTCGTAGTGTATTCCTT  
AAATTTACGGCAGGAAGAGTAAAAAAGAAAATAATTCAAGATTCTCTACTTAAATTAATGCATCCTTTCC  
ATTAATAGTTTATAACTGGCGCGATGCAATACACTGGAAAAAATTAATAATAGTTATAAGTACGAGAAAT  
ATCTACTCCTAAACCAAATA

>Negative Sample 125

CAACAACATTTTAAAAAGTAGATTTGTCTGCCTCAGCTATGAGATGCGCATGTCCCTAGCATCTCATATC  
TGTTTATATTATTTTTTCCACTTGGTGAATGTTGAAAAAAACACCACTCGTCCAATTTATCAGTTTGCAG  
GTCTAATGTCTTCCCTGTTATTTAACTGTATATTGTAAGCATGTCTTATCGAAACAACCTACTCAGTT  
GTCCGAAAACAAAACCTGCAAATTTCTGTGTGATTACCGTACTAGAATCCTGTCAAATTTGGATCTTGATTT  
AAGCTTTTATAGCAACGAAC

>Negative Sample 126

GTGGTGTGATTTGTCTCAATTTGAGTCCTACATCGACCCTGAAATTAATGATTTTCAGATTAACCTGGTTT  
AGGTAGAGGTGGTCAACAGGTTCAACGAGCCAAGGAAATCTATTCAAGAGCCGTTGAAACTTTAGTTGAA  
TTAGCCTCTTTACAGACTGCATTTATTATTTTGGATGAAGTGATTAAGTGACGAACAGAAGGGTTAATG  
CTATCGAACACGTTATTATCCAAGAAGTAAAAACACAATTGCTTACATTAACAGTGAGTTGGATGAGTT  
GGACAGAGAAGAATTTTATA

>Negative Sample 127

TTTAGAAAACTATCCAAGCAAAGGCCACAGTCCGGAATTTTCAATGTTTACATTATGGGATCTATTTTG  
TCTCAATTTGCCGTTTCAATTTGCCACTTTAGTTTACATCACTACAGAGATTTATAAATTGGAACCCAGAG  
AGCCACAAGTTGATCTTGAAGGAATTTGCTCCATCATTATTGAATACGGGTATTTTCATCATTAGTT  
GGTACAACAAGTCTCTACATTTGCTGTCAATTATCAAGGTGAGCCATTACAGAGAAAACATTAGGAGTAAC  
AAAGGTATGTATTATGGTTT

>Negative Sample 128

CCCTGCTGGGGATGCTGAACGTTGCTATACAGTTTCCTTTATATGAAAATTTAAAAATAAGGTTCCGGATA  
TTCAGAATCGACTGACGTATCGACAGATGTGACGAGCTCAAACCTTCAAAAATTAATATTGGCCTCTATG  
CTATCTAAAATGGTAGCATCTACCGTGACTTATCCTCACGAAATACTTCGAACTCGAATGCAACTGAAAT  
CCGATCTTCCAAATACTGTTCAACGCCATCTCCTTCCATTGATTAATAATTACGTATAGGCAAGAGGGCTT  
CGCCGGCTTTTACTCTGGGT

>Negative Sample 129

CCCCCGTACATCGCTTGGCGTAATTTTAATAAATGGGTGGAAGTACTTTGCAAATGGGGCTCCAGTGCGA  
GGACGAGTATTGAGTTGGGAGGGACAGAGTCTATATAGTTCACGGCAGGTCTTGGATCATCAATGGGTGC  
AAACAGTACTGTGTATGCAGTGCCTACTATGGAGCTATTTTTCGGGTGGAGAAATTGCTGTTAGATTAGGG  
AAATAACCACCCGTTGGAATGTTATAAACATTCAACAATCCGTCCGAAATATCACAGGTTGAGAACCCTCT  
GTAACCTTTTGAAGATCTGAC

>Negative Sample 130

GAACCAATTTATTCCTCATCTAAATCATAGGCCAGAATAAACTGAACAGATGCGTATAAAGGCGTTATA  
AAGATGCCAGAAGCATATCGCGGGCCACGACTAAAAATGCCGCGAGGTCCGCCCTGGACGGTAAGCACGTG  
CTCAAGTGTGCCGACTCTTGGGGTCCAGCGCCGGGTGAGAGTTTCCGATCACGTGGTCTCCGTGCATC  
GCGACTTCGATCCAGCAGCGTGAATCATCGCCGAATACGAAACGTACGTCATGCACATCGCTGGCTCCGG  
GTAGTACACGAAGCTGCAAC

>Negative Sample 131

TTATGTTCAAGTCTGTGGAAACCTCGTGAACAAATTTACATCTAAAGGGTCTTTGGTCATTATCCGGAG  
GAAATCTATCTCGCAGGTAATTCATATATGGAATTTAAGAAAAGGATCGCCGATGTGCACCTACTAAGAG  
CAAAGGAAATACTATGAAGCACACCGACTCATGGCAAGAAAGGGTCTCTGTTTTTAACTTTATCTACT  
AGGATTAAGGAAAAAAGAAGAAAAATAATGAAGCAACAAAAAAACTGGAAGTCTTTGCCTTCCAAG  
TATTACTGATTGAAGAACAG

>Negative Sample 132

AGCTATCGGCGATCCAGCCTGGAAGACGTATTATGACGAAAATTCCATAGGTGGTTTAACTTTTGCCTT  
CTTGTCCTAATTCTGTTACGGATTCGGTCAGTTCTGTTGCGTGTTATTGTCTCTGTCCACTATCGCTA  
ATAATGTTCCCAACATGTATACTATTGCTTTATCGGTGCAAGCCACGTGGGAACCTCTTGCGAAAGTCCC  
AAGAGTTATTTGGACTTTATTAGGCAATGCGGCCGCACTGGGTATTGCCATTCTGCCTGCTACTATTTT  
TCTACCTTCATGAATTACTT

>Negative Sample 133

GTAGTAGCCGGTCTAGCGTTCCTCTATTTTTACCATGATTCTTGGTGCTGCTTGCGGTATGGCGGCC  
TTAATGACCCAACCTGGAAGTCATATTATGATAAAACGCCATGGGTGGTGTCATATATGCTATCCTGGT  
CCCTAACTCTCTAAACGGATTCCGGTCAATTCTGCTGTGTTTTGTTGGCTCTTCAACTGTTGCTAATAAT  
GTCCCTGGAATGTACACTGTCGCTTTATCCGCTCAAGCTTTGTGGGCACCTTTGGCTAAAATACCAAGAG  
TAGTCTGGACAATGGCAGGT

>Negative Sample 134

GATAGGCATTTTTCGTTGACTTTTTGTTATGTTATGCTAAGAGTTTTCTCTCAATTGTTAGGTATTTGGG  
TGTGAAAAGAAAAAAGGATAAGATGAAATTAGCAAGCCAAGACAAATAATAAGAATTTTGCCAGTGAAG  
CAGCTCCTTTATATAATAAAGAAACGTTTTGTGAATTCGATGTGCCTGGTTAAGGGCGGACTTTGGACT  
GACTTATGCTTTTTCTTTTTGCACCAATATTGAGTCACATACTGGGATGCTAGTCCGGACTATGGATATT  
TTCTTCTGTAAGGGTAGTG

>Negative Sample 135

TACCAAACGTTCCACAAGAATTGAAGGACTTATACAAGACTGTTTGGGAAATTTACAAAAGACTATCAT  
TAACATGGCAGCCGATCGTTCTGTCTATATTGATCAATCTCATTCTTTGAATTTGTTCTTACGTGCCCA  
ACTATGGGTAAACTAACAAGTATGCATTTTTACGGATGGAAGAAGGGATTGAAGACCGGTATGTACTATT  
TGAGAACCCAAGCTGCATCTGCTGCAATTCAATTTACTATTGATCAGAAGATTGCGGATCAAGCTACAGA  
AAACGTTGCTGATATTTCCA

>Negative Sample 136

TGATGGGTCTTCCAGATGATATTCTAACCAAAATGGATGGTTATAGATGGTTGCGAAGGGCTACATCTAT  
GGCTAGCAGCTTTGTTTGTGGTGCTCCTTTTTGAATTAGCCAATATTTATATGACGGGATATAAAGATCTT  
ATCATTTCCGATCCAGATTATGCTATGGCATTGTATGAGAAGGCGGCCGCTTTAGGGCATACTGAATCGG



CAAGAATACTAGAAGACGCTCGCAGAAGTGGAGGGTTTGTTCGCGAGGACATCCTCCTTCGGCACAGAA  
ATATCATAAAACCTCCCATG

>Negative Sample 137

ATCAGTCATACACAAAATTCACCATTTGTACCATATTCAAGTTCTAAAGCTAACCCCTAAAAGAAGTAATA  
ATGAGCACAACCTTACCAAACCTACACAAACCTTGCAAATAAGAATATCAATTATCAAAGTCAACGAAA  
TTACGAACAAGAAAATGATGCTTATTCTGATGACGAGAATGATACATTTTGTCTAAAATATACAAATAT  
TGTTGTTGCTGTTTTTGTGCTGTTGATAAAGCGATTTTTATACTTTTCTCTTTTTCCTTTTTTTTTTTG  
ATTGGCTGTTTCCTTATGCC

>Negative Sample 138

AGTCCATGTCATGCTTGAAAGATTTTAATCAACCTTGCATTTGTGGTCGTAAACTCAAAGGGGATATTC  
AAACGACAATCGACAATACTTCGAATAAACTAAGATTCATTTATTGGGATATAATCAATTACCCTTC  
ATTAAGTGGTGTATATGTTCTGACGTATTGTCATTTTCGGGATAAGAGGTTTGATGACTATTTCTCGAT  
TTTCATGTCATCCTCTTTACACCGTACGTGATAATACACTAATTACACGATATAACTGAGCAATGATATT  
TTAGAGCTTCATCTCCACAA

>Negative Sample 139

ACATTCCTTGTATAACAACCCTCGGTATTCTTTAACAACCTTACGATGACTATATTGTATTAGTGTCA  
ACCTCATCGCCAGGAACCTTTTCATTGAAAATCTTCTGACAAATTTTCTGTGTAAAGGAAAGAAAATGGAG  
TATAAATCGAAAGTTTATTCCAATTGTGCTAGGCTGTAATGGCTTTCTGGTGGGATGGGATACGTTGAG  
AATTCTGGCCGAGGAACAAATCCTTCCTCGCGGCTAGACACGGATTGCACGCCCTTTGGGCAAGGGATAG  
TTCTCTATTCCGCACCGTGC

>Negative Sample 140

CCAACCAGATGGATTGGCTTGGTTTTGGGTCATCATGCACTGCTGTGGGTACGGCCATTCTGTGGAGGT  
GGTACTGAAGCAGGTTGAGGAGAGGCATGATGGGGGTTCTCTGGAACAGCTGATGAAGCAGGTGTTGTTG  
TCTGTTGAGAGTTAGCCTTAGTGGAAGCCTTATCATATTCTTGAATTTTGGAAAGCTGAAACGTCTAACGG  
ATCTTGATTTGTGTGGACTTCCTTAGAAGTAACCGAAGCACAGGCGCTACCATGAGATATATGTGGGTAA  
TTAGATAATTGTTGGGATTC

>Negative Sample 141

ACGAACTCAATATCCACTACAACAAGCAACGCGACCGGAAACTACTTTCAAGATCAAGATAAGTATACAT  
TGGTAAATACGGGATTGGGATTGAGTGATGCAAACCTCGATCATTTTATTAGATCTCAATGGAAACACGC  
TTCTCGATCAGAATCCAATAATAATACCGGAAATCGCGTTTCTTACAGTGGCTCAACACCAAACAATGTT  
GATACAACAAAGACTAATTTGCAAGTGTATACCGAGTTCGATTTTAAAACCCAGAGTCGTTTTTCCATG  
AGCAATCGAAGCTACTAGGT

>Negative Sample 142

AGCATATATTGATACAGAAGGCACTTTCAGGCCCGAGAGGATTAAGCAAATTGCAGAAGGTTATGAATTG  
GATCCCGAGTCATGTTTGGCAAACGTTTCATATGCTAGAGCCTTGAATAGTGAACATCAAATGGAACCTG  
TTGAACAATTGGGTGAAGAACTTAGTTCTGGAGATTATCGCCTTATCGTGGTAGATTCTATAATGGCAA  
CTTCAGAGTAGACTACTGCGGTAGAGGTGAACTAAGCGAAAGACAGCAAAGCTAAATCAACATCTTTTC  
AAATTGAATAGATTGGCAGA

>Negative Sample 143

ACAGACCATACTATCCAGGTGAGTTTGTTCATGGGAAGACGTTTCAGATGCACTTGGAGTGACTGGTTTTGA  
CCAAAAGGACTGCGCAGGTGAGGGTTTTTACGACGAACAACTGCAGCAACGTCATGTCAAATATAGGC  
TCCACTCAGTACGCCAAGTCCGGTCAGGTCTTATAACTATGGATGCTGCGGCGGGGCGGTCTGGATCAGGA  
TTTGCCGCATCACAATTGTTCAAAGGTCATGATCACCATTTCAAGATAAGGCCAGGCCAGATGCTATG  
CTGGAATGTCAACCCATATT

>Negative Sample 144

AACCCTACCCTAATCCAACCCTTCCATCCTGTCTCTCAACTTACCCTCCATTACCCTGCCTCCCCACTCG  
TTACCCTGCCTCCCCACCACCAACCACAAATCCACCATAACAGTTACCCTCCAATTACCCATATCCAAC  
CTCACTGCCACTTACCCTGCCATTACCCTACCATCCACCATGTCCTACTCACTGTACTGTTGTTCTACC  
TCCATATTGAAACGTTAACAATGATCGTAAACAATGCACACATACTTACCCTGCCAATACCCTACCATG  
CCCCATCTGTCATACTACC

>Negative Sample 145

TTTCAATTCCGGTGATGGCAAAGGTCCGTATTGGACACTTCGTGGAGGCACAGATCCTGGAAGAGCTGCA  
AGTAGACTACATTGACGAAAGTGAGGTTTTGACTCCAGCTGATTGGACACATCACATTGAGAAGCATAAC  
TTCAAGGTGCCATTTGTTTGCGGTGCCAAGGATCTAGGTGAGGCTTTGAGAAGAATAAACGAAGGTGCTG  
CAATGATCCGTACCAAAGGTGAAGCAGGTACCGGTGACGTTTCCGAGGCCGTCAAGCACATCACCAAGAT  
TAAGGCGGAGATCCAGCAGT

>Negative Sample 146

CACATGAAGGCCTAGCTCCAAAAATTCTGGCTTGGACCGATCGAAGAGGCGTTCATCCCCGCCATCAC  
TGTTTTCAACGCCTTGGGCCTAATATCATTGATGAATGTGAGCGTTGGAGCTGCAAATGCGTACTCTTAT  
ATCGTTAATCTTTCTGGTGTGGCGTCTTTATTGTCTGGGGTGTAATAAGTTATACGCACCTGAGAATAA  
GGAAGGCGTGGGTTGCTCAAGGAAGATCCATAGAAGAGCTACCTTATGAAGCGCTATTTTATCCGTGGAC  
GCCAGTACTTAGTCTGGCCG

>Negative Sample 147

AGTCGTTTATGAAAGAGAAAAGAAAGAAGAAGAAAAATCAAATTTACGGCAAAAACAATAAATCAATGTT  
AAAGCACTAGTAATTGCCGGATGAAAAGGTTTCAGAAATTGGTTGCGGAACGTTTTTACGCCGCCAGGGT  
TTTTCATAGACCATTTATGAGATATTATACAGCAATATTCTAGCACAAAAGATAATCAACCCGAAATATC  
AATTTTCATAGGGTATAAACCCAAGAACCCTCTTGACCGGTGACTTTTTCTCCGAGTTATATTCTAGACCAA  
GCACCTCTTTTCACCTAGCA

>Negative Sample 148

AGAAAAAGCAGTTGCTTAATTTCCCTCTTTTTCATATTCTCTACGCTAGCACTGTAAGGAAAAACGCAGA  
AAGCAACATAACAACGTTTGTAGGATGTTTCGTAATCACAATAAGCAGACAATAACCATTTCAAGTGTA  
AAAAAATTTTTTTTCTGTTAGTTTGATGCAGAAGACTTATACTTTTAACTTTTTTGGTTAACTTACACAA  
ACCAAGCGCACAAACGCTGCGCTTTTTAGTATTAGATGGCATGATTTGAAAAGCATAAAAGTCTGGATAT  
TGGAATTTAGGGAGGCGGCG

>Negative Sample 149

TGGTAACTTACACAAACCAAGCGCACAAACGCTGCGCTTTTTAGTATTAGATGGCATGATTTGAAAAGC  
ATAAAAGTCTGGATATTGGAATTTAGGGAGGCGGCGGGATAGAGCGATAGTTTCTCCCATATAAAGTCT  
ACAAAATGTGTGGGTTTTTGATATCGATCGAAATTTACAAGGTGTTCTATAATGACTAACATTTTTTGTG  
AGCAGTTGACTCTCCTTAGTGCACATTGTGGAATATGTATGCCATGTCTCTTAAAGGGGTAAAAAGAGGT  
ATTCTGCATACTACCAGTGG

>Negative Sample 150

TGGTATTGCTGTTTTAAGTGAGGAGTTTGTTCGAGATAGAGGAGATGATGAACCCAGAAGAAGTGAAAAGA  
AAAAGGAAATTAATAAATGATGTCGATGCAGCCCAAAAAAAAAACTAAGTGAAAGAAAAAAGCATAACAGTT  
GGGTGCCGAAGTGGTTGAAACCGAAGAAATCCAAATGGAAGGTCATGGTTCGAAGAAGCTGTCGAAGAAGG  
AAGAGATATGCAAGACCTACCAGAAAATGACGTCAATAACAATGAAAACGAAAATCCAGATGAACATGAA  
GGGATAGCAAGGCAAAAACG

>Negative Sample 151

ACCAGCTAGGCTTGCAGACCGTCATTAGGGGCAACTCCATAATATCCCTAGAGGCTCTAGATGCCATATA  
AAATTATATATATATATATATATGTCGACCTCTATGTAATACAGCAATACTATTTTCTAATTTGCATT  
TCCACGCCTGCGTTGCTAAACCCACATTTTTCATAGAATTTGACATTTTCTCATCGCAATCTAAAATAA  
TCTTATAACAACCGTAGTCAAAGCCGATAGTTACCAATTGATCAATCAAGAGCTTGCCCAAACCTTGCC  
CTGATACTTGGAGTTTACTG

>Negative Sample 152

TACAGCTTTGGTTCGGTTTATTAAGATTATCCGACAAATTTTTGGTTCAGTGCCGCTGCAGACGGTTCAATA  
AGGGGTTGGGACGCAAACGACTACTCTAGAAAATTTTCTACCATCATACCAATTTGAGTGCAATTACCA  
CATTTTATGTATCGGATAATATTTTGGTGAGTGGATCGGAAAATCAGTTCAACATCTATAATCTACGGAG  
TGGGAAATTTGGTCCACGCAAATATTCTAAAAGATGCTGATCAGATTTGGTTCGGTTAATTTTAAAGGGCAA  
ACACTTGTTCAGCAGTTGA

>Negative Sample 153

CCCAAATGCCTTCATTGACGTTGATTTCTAGAAAACGTTCAATCTCTCTCACACGTAAATGAGCCCTTC  
ACGAGAACCAATTTTGCAATCAGAGCAAACAGTTTGCACCAGAGTAGAGTTCTATTACATTCAACAAATA  
GAAAAGCTTCCAAGCTGGAAAACCTATTGTTAGTTGACATCATAACAGTTAGCGACATCCCTTTATCCTGA

TATTTATAAACCCAGCACAGGGAACCTTTGGTACACTGTATGAAACAATTAGTTGGGTCATATGGCGTAGTC  
ATCAATAAAAATTATTCATC

>Negative Sample 154

GTATTGTGTAATTATTTTCTTTCAAATTATATGTGAATGAACAAACCAAATCCAGGATAGCCACTGCTTC  
TGCAATCATAAATAGTTTCAGAAATATGGGTGCAATTTTATCGAGCAGTTCATCAACTGTCTCTTCACTT  
AAAAGTAAAATCTCTTCCATAACTTCTTCAACCTCGCATTTTTTTTTTATTATATTTAGGGTTGTACATT  
CAATATAATTTTTTTTTTATTGTTCTTGAATGAATACGTCTGGAAGTGTAGCGACGTCATCGGTAAATTC  
CTGTCTTTTTATTCTGAGAT

>Negative Sample 155

GTCTGATAATAGTGAATTGTTCAAAGTATCTTCAAACCTTCTTTAACGTTTCAAACCTTCTAGGTTAGATAGC  
CTTTGTGAAACCTTCTTCTCAATGAACCTTTTCTGCATTTTGTCTGGTGACATAGTCTGATTCCCTTCGATG  
AATCCAATTGAGAAACCAAAGACTGTGAAAAATCGATCTGTGTTAGCGGAGTATAGACTTGTGTTTTTC  
TGCACCAGCACCCACTTTGGAAGTGTGTAACCCATGATTGACTCTGTATTAGTCGATATACCACCTTGT  
TTTTGTTCTTGAATTTTTTT

>Negative Sample 156

TTCTATACCAACTAGCTTTTCATTCTCTAGTTTTATGAGTAGCACTGCTTCCCCTATTTCCATAATTAAT  
GGCTCTAGAAGTAGTTCTAGTGGGGTATCTCTTAATACACTTAATGAGTTAACTTCGAAAACCTTCGAATA  
ACCCATCCAGTAATAGTATGAAAAGGTCACCAACAAGACGGAGGGCTACTTCTTTAGCTGGGTTTATGGG  
AGGTTTTCTATCAAAGGGTAACAAACGATAGTCGCCGATATTGTTTCGGCTCGTGCATTAAGCTTGTATA  
GTTTCATATAGAAAAGTGATG

>Negative Sample 157

GAGAAGAGAATACTCAATTGCCTCCTCTCAGAAAGTTCATCCAAATGAAGTTCATTTATTGATCGTTGTT  
GTTGATTGGGTGGATAATAAAGGAAGAAAAAGGTACGGTCAAGCTTCTAAGTATATCTCAGACCTTGCTG  
TCGGTTCAGAATTGGTCGTTAGCGTTAAACCATCTGTTATGAAATTACCACCATCTCCAAAGCAACCAGT  
TATTATGAGTGGTTTAGGTACTGGTTTGGCACCATTCAAGGCCATTGTTGAAGAGAAATTATGGCAAAAAG  
CAGCAAGGTTATGAGATTGG

>Negative Sample 158

TGACAGCTTCGAGAATTACTTCAACCAATTGAAGCCTTACTACTTTAGCAACAATCATAAATTATCTGAA  
TCTGACAAGAAATCGAAGCTGATAAGTCTGTATTTGTTGAACTTATTGTCTCAGAATAACACAACCAAGT  
TTCACTCGGAATTGCAGTATCTAGATAAACATATCAAGAAGTGGAAAGACGATTCACTTTTGTCTTACCC  
TATCAAACCTAGACAGATGGCTCATGGAAGGGTCGTACCAGAAAGCATGGGATCTTCTGCAATCTGGGTCCG  
CAGAATATATCAGAATTCGA

>Negative Sample 159

ACGTACTCCTTAAAAGCGTCTAAATCTTCATTTTTCCGGTTTATTTCCAACCGGGAATAAATTATTCCT  
AATAAAATTTCCGGGGTTTGCAGGATGCGGGGTAAAAGTAAAAAATGAAAAAGATGTAAAAAGAAAAGT  
TCGAGGTAAGACCAGGTGCAAGGAGAATACTGGGCGCCAATGCTTTTACTGCAGCGAAGAAAAATTCTAA  
CCGTCTGTTTCGGTTGCTAATTTTTGTCTTACTTTTCGATGGTTAGGCTTCGTGGGGTAAAAGTCGAGCTT  
GTTTTCTGAAGCGGAAATTA

>Negative Sample 160

AAGGTCAGAGAATAAAAACGCTTTTCCGTTAAAAGATCCACCATATGGAAGAAAAATACGAGAGTTAAAA  
TGCTATTTAAAAGTGCTAAAGGAATCCCCAGAGACCTCAGCTGAGATAAGTAATATCGTTGATGAATTAC  
AAGGGAACAATGAGCAGAGGGAAAATGGACAGATCCTTTTCGATTCCTACTTGTGTTGATGAGTTCAAATG  
TGAAATAGTAGCAACAAAAGGTCATAAATCTTCAATGATATTTGGACCTACTAGTGTCTATAGTAAGTGC  
TCGGCCAAGTCAAGCGGTAT

>Negative Sample 161

TATATATTTAATAATAAATACATTATTGGAATGGCTAGTAAATTTTTGACATAAACATGATTTCCGAACGA  
ATTAAAATACAGTTGATTTAGGAGAAAGTATCAGTACATTGCTAAAAATTTAAGCAAATGTTAAGTGAA  
AAAGGCTTATCATTAGATGAGCTTAAAGAATATACTTTTTGCGTTATTCAAGAGCGATGATTTACTGA  
ACTACTGTGACGATATCAGCAGCATGCCTGATAAATAAATCTGTACATTTCGTGGAAAGTAGTATGACTT  
TTCAAATATTTCTAAGAGCT

>Negative Sample 162

TTTTCAATCTATTTATATAGAAAAGAATACGCTTTTTTTATTATTTATGAAAGGAACATGAAAAAACTAC  
GAATGTACAAAAGCAGAGATTGCTAGAGAATACATTGGTCAAGAATTTTCGCATATGGAACGCATTGCTC  
TTTTAGATGGGCTGTTAAATAATCGTAATTTAGGTTAGTTATTGCCCTTTGCGTCTTCCGTGGAACAATG  
TTGGTCCAATAAATTATAAAGAAAAGAAATTGGATAGCACAAATAAAAAGAGCAAGCGATAATGCAAAAACA  
TTAAAAGTCTGTTTTCCATT

>Negative Sample 163

TAGATGATAGTTGATTTTTATTCCAACAGTTTATCAACTAGTAGTCACACTACCAATATATTATCATATA  
CGGTGTTAGAAGATGACATAAGGTATGAGAAGCTTTCATCGAAGGTAGAGGAAGCAGAAATACAAGGATT  
TATAATGTAATAGGGTAATGGAACATATAAGGGAGGAGAAATGATGGTGATATTAATATGCAGAAATATC  
GATTCCATTTTTTCAAAAAAATAGTGCCAAACTATTAAGAAGTAGCGAAACAGCAAAGGCATATTTCCAC  
ATTTGCTTTTTAGCAATATA

>Negative Sample 164

AGTTCTCCAAAGCAGGACCATGACGAATTTTTGAAGTCCTTGGCAAACACTTTCCTTTCCTTGGATACAG  
AAGGCCGTGTTATTAGAATGGATTCTTTTTCAAAGTTTTGGCCCCAGGGACAAGATTGGGTTGGATTAC  
TGGTTCATCCAAAATCTTGAAGCCTTACTTGAGTTTGCATGAAATGACGATTCAAGCCCCAGCAGGTTTT  
ACACAAGTTTTGGTCAACGCTACGCTATCCAGGTGGGGTCAAAGGGTTACTTGGACTGGTTGCTTGGCC  
TGCGTCATGAATACACTTTG

>Negative Sample 165

ACGAATGCCTATGGTGACTACCCTTTTAAAACATAACATACATCTAAAAAGTAACGACGTTGAAGATAAAG  
AGAAGTATCATAGTGTGTTGGATGAAAATGACAGAATAATCATAAGAAAGTATATTGATAGTATTGCAAA  
CAGGTTGAAAATATTGAGGCAGAAGATGAACCACCAAAATTAAGTGATGCATAATATGGTTTTCTTATTA  
AGTACAAATGACCTGCTATATTTCAAGTATCTTCATGATTATGTTATGCTACTCTCGAAATGCTTTACG  
AGTTGCTCATTAAAGTATTC

>Negative Sample 166

TGCTCCTTCAGCGAATGCGTCTACTAGGCCATCTCCTACTTTAGCGTCTCATGTTTATCATGATCTAAAG  
GATAAAATCCCATAATTCTTGATGGCGGAGCGTGCAAGGTTGGTGTAGAAAGTACTGTTGTTGATGGGT  
TATGTAATCCTCCTACGCTACTGCGACCTGGCGGTTTTACATATGAAGAAATTGTTAAATTGGGTGGTGA  
AGCTTGGTCTCTTTGTAAGTTGAGAATAAGAAAACAGTTGAAAAGGGCGAAAAGGTAAGAACGCCTGGT  
ATGAAGTATAGACACTATTC

>Negative Sample 167

TATTTGGAAGTAATATAAAGATAGAGCTTAATCAGTATCAAATAAACGACATCAGTTCAGAAGGTAATGG  
CGCTGTTTCTAACAGTGATATTATCTTTGGTTGTCTACCTACTCTAGAGCCCAACTTGTTTTTGGAGCAG  
TTGCTAAACAGTAAAGCTTCTGTGGAGCAGAAACATACTTATATCTCATTAAATTGGAAGTTACAAACCAG  
TGATGCACGAATGCGATAAGGAGTTGATTGATAAGTTCAAATCTGATAATGAAAGCGCTTGCATTTTGGT  
AGATTCAAGGGAACATACTT

>Negative Sample 168

TAATTTCCGATGAAGTATGGGAGAAATGGATCAACTATGAAGTTGAAATGGCCAATAGGCAATTCATCAA  
TATAACTAAAAATCCGGAAGATTTCCCAAAATCTTCTCAGAATTTTGTCAAATTAATCAATAAAATTTAC  
GATTATTTGGAACCGTTCTACGATTTGGATTTTGTATCTATTAGTAAGATACAAACTAATGACTTGTTTAT  
TAATTTTTATGAACTTGACTTCATCCTACTTGGATTACATTTTAACTGTGATTGATTGAATGAAACAAG  
AACTAAAGAGCAGGAATTGT

>Negative Sample 169

TTATTGAATTACTCGAACGGGTTTTTATCTTCTTTTTCTGATCTGGGAAGCTATGATTGGTGTGTTGATA  
ATAATTTGATCAAATTATTGAACATGACCACTGACGAGATCAAGTCTTTAGATTTAACCTTTGAAATAGA  
TGAGCCTGAAAGTTCCGCAAAAAGTTGTTGACTTAATTCCGAATGGTTCAAAAACGTACGTGACGAAGGAT  
AATGTGTTGCTCTACGTTACTAAAGTAACGGATTACAAATTAACAAAAGATGCTTCAAACCAGTTTCGG  
CATTCCATGGAGGGCTCAGT

>Negative Sample 170

TATGACACGTATGGAGGGAAGTGAATAATGAAATTGCCCAAGGCATCACAAAGAAACCAAAAATTTTATT  
TCGGAGAATATCATGAGACTATGTCTGGAAGAAATTGCCACTTCAAGTATATGCAAACGGATCCTAATT  
GGGCAAATTTCTCTATAACGGTAGGACAAAGAAAATTGAATTATTGGATTTCCGGTGCCTCCAGACCTTT

TGCAGAAGATTTTATTCTAAAATATAGAAAACCTTTAACTTACGCCACATTGAGAGATAGGAAAGGGGCG  
TACGAAATGTCTGTACAAC

>Negative Sample 171

GATTTTCGGGCGAACTAGCTTGTAACCCAGCATAGAACATCAAGGGAACCACGACCAGAAATGCAATGTA  
GTAGAATTTGAACTCAGTAGTTTTCCATAGTGATGGCTTAGTGGTAGTAGAGGCATCCTTTTTTGGTGAA  
GGTTTGATTCTTGAATCTAAGCCCTCGGAAGTAATTAGGGGAGACAGGATGCTGATCAGCGACATTTCTT  
GCAATTGTCTGTAAACAAATGCTGATTCACGCTTTGTTTTTGCCTTTGTATGATTAACATCTATATATCG  
AAAGCAATATGCTAAGTTAT

>Negative Sample 172

ATCAGACGTTTTAAGGAACAAGAGAAGAAAGTTGACTTGTCGTCCAGGCCTGGAAGCTAGAGCCATTTGAT  
CTCGAAAAAATTAGAGAAGACTTGCAGAATAGATTTGGTGATGTTGATGAGTGCGACGTTGCTTCTTATA  
ACATGTACCCAAGAGTTTATGAAGACTTCCAAAAGATGAGAGAAACGTATGGTGATTTATCTGTATTGCC  
AACAAGAAGCTTTTTGTCTCCACTAGAGACTGACGAAGAAATTGAAGTTGTAATCGAACAAGGTAAAACG  
CTAATTATCAAGCTACAGGC

>Negative Sample 173

TATAACCACCTGCTAGAACAGATGAGATTTCTGTTGGTTCTGTTTCCAAAATTCAGCTGTATGCATGGT  
TTTGTCAATTTTCTAGGTATGAATTACTGGAGTAAGCAATAATATGAGTAAGCAGTAAAACTTTTTTTTTA  
TTTGGCTGATTGGGCAAGAAAATCAAAGACAATAGAGTGGCGCATAGATGTTGCTAGCATTTATTAGGTT  
GCCTTACTCTTATATAAATCAAGCGGGAAGCTTGCTCAAGCCAATCACCGCACCGAACAGGGATTGCTC  
GTTTACCCGTATTTTGATT

>Negative Sample 174

TGGTTGCCATCTCATCGCATCCAATGCTGTCTGTAATCATTTTATTGGACTTTTCTTTGTTTGCTAATCC  
CCTTTTCTTTTTCCCGTTCTTTTCTGTCTTGTTTTTTCAATTTAACTATATTTCTGAAATTAAGGAAA  
AATAAGGCAAAAAGTGGGTGGATGCATCTGCGACTTCTCTAGTTTTGCGCCTACTTGGGCGCGCTAATAA  
TAAGGGTTTAGCTTCTTAAATAAAAATGTCAGTAACAGTTGTACGATAAGGTCTTTACTTTTTTTCTCT  
CGAGAAATGTCTTTTTCTAA

>Negative Sample 175

TTCAAACCTTTTGTTCATGCGATTGCAAATTTGAGCCTCTTCTATCTTTCTTGAACACTGGGGGTATTTCA  
CCATTATCAATTAAGTCATCAATCTCATCGCCTGGCTTACCCCAATTACCCTTGCCGGAACCTTGCTTCT  
TGATGTGATTTGGAGATTCACCGTAGTTACCAGTGTGCGAAAAGTACTTTGGATCAGCCTTTCCTTCAG  
TTCGGTCCACTTGTGTTCTCGTCATTTTTTCTGATTGGTTGTACACTTGAGCGGTTTGTACTGTGA  
TTGTTTCGTTTATTTGTATAA

>Negative Sample 176

ATATATAATTAATATTTTCGAGATTTACATACTAGTGGTTACTTAAAAGTGTAATCGCAAATTATATCAG  
AAATGAACAAAGATACGCAGTCCAAATTTATGACAACAACCAGCATATGACTTAGTAATATTTTATGAA  
GTTACTAAATCAAGATTAGAAACGTAAAAATAGAATAACATGATCAAGTTCAAGTCTGAATTTCTTTAA  
TATTTGGATAAGTAAATTCACTACGTGACATGATTGGTTGGTGCCAACATAACAAATTTAACATTATG  
TAATCTACAGGATAAGTAGC

>Negative Sample 177

AACGGATAGTGTGGGTCCGGTTGATAATACGCAGGTGACGTTTGATAATGTGAACACGTCATCATAGATG  
GTTGTTGGTAATGTGCCAGTTAGAGGCCATAGCTTTGTTTGGGGTCATCATGCCGTGCTGTTGGTACTG  
TCCATTCTGTGGAGGTGGTACTGAAGCAGTTGAGGAGAGACATGATGATGGTTCTCTGGAACAGCTGAT  
GTCCAGGTGTTGTCTTGTGAGAATTAACCTTAGTGGAATCTCTATCAAATTCGGTAAATTGGAAG  
CTGAAACGGCTAACGGATCT

>Negative Sample 178

CTGCTTCGTTTCGATAGCAGAGAAGATGTACGAGACATGCAAGTGGCCACACAGCTATTTTCATAACCATGA  
TGTAAGGGGCAAAAACCGACTGACAGCTGAGGAACTACAGAACTTACTACAAAACGACGACAACCTCCCAT  
TTTTGTATATCATCAGTAGATGCGCTGATAAATTTATTTGGTGCTTCCAGGTTTGGCACTGTCAACCAGG  
CAGAATTCATCGCCCTATACAAAAGAGTGAAAAGTTGGAGAAAAGTTTATGTGGACAATGATATCAACGG  
ATCGCTCACCATTTCTGTAA

>Negative Sample 179

ACGTGGGTTTTTTTATTTATACTGTATATAAAAAGAGGACTGCAATAGCACAAGATTAAGATAGAATGGCTT  
CAAACAGCCGCCTTTTATACATATTGGTAAAAGCTCGCGAATCGCACCATATCCCTTATCCTGTAATCAA  
ATCGATCTAGGTGCAGATACAGATCAATTCATAAAAAGAAATTGAAGCACCAGTTTATCACTACTACT  
ATCTTTTTCTTTTTTTTTTTTTTTTTGCGAAGTTTCGCCCTTTGTTCAATATCACTTGATAAGTTGTGGGC  
TTTTCTGTCACTCATTCCGG

>Negative Sample 180

TTTTGAGACAAGAAATTGATTATTTTAAAGGCAGGATTTACAGAACGCAACACATGACGAAAAGAGCAC  
TTTAAAAGTCGAAAATTGAAGGTTGCCCTACAGCAAAGTGAGACTGCGGTAAATAAGTTAGAGATGCAA  
TTGAAAACCTCTCACTGAAAAGAGCTTGAATTAGAAGAGGAATACTTGAAAAGAAAGATCTACACTTGA  
AAAATCAATTAGAGTTCAGTAAGTTAGAAGAAAGCTTATCGAAAAGACCTGAAAACCTCAGAAGGGAGGTT  
CCAAAAGGTCAATCAAGAAT

>Negative Sample 181

GATCCAGAACAGTCAAAACGGTTTGAAGCCTTGCATAGATACGCATATGCTATTTTCAATAAACGTGGTT  
CAGGTGAATACTTATTAAGCTTTGCTTTGAAATGTGGTGGTGAACCAAGACTATCATTGGAGCAGCAGCT  
ATTCGATGGCAAAAAGTCTGATATTTTAAAGAATAGTAATTGTGACTGGCTTTGGCTTTATGGCGATGAC  
GATTGGATGGATGTGAATGGTGGACTTAGAGTATCAAGATTCTTGAAAGAGAAGTTGAAACAAAAAAGTA  
ACGTCATCATTGTTCCCTCAT

>Negative Sample 182

GACTACCCGACATATGATTATATCCAAAGCCATCTAAATGCATATTATAACGCCAATTTAACTGATTGGG  
AACAGGCTGGATATACTTTCCCAAAAAATATTCTAACAGGAGGTTGTAGTAGTTCAAATTTCTCATTATC  
CTGAGGTTGATTTTTTTTTTTCAACTGGTTAAAACCTACTATCTAAGTGCCTTTAATTCTAAGGAGGCA  
AAATAGTCTGCGGTCACAGTCGTTGAAAGTTCTAGATTTGGGTACGGAAGCAGCCATGTAATGGTCTTC  
CTTTGTAATAATATCATCAC

>Negative Sample 183

ATTGTGAAGAAATCTATTAATAAATGGCCTATGGTCAAAAAGCACACGGAATGGTAACGAACTCCTGTCCA  
GTTTGGCAAATAATAACAATAATCGCTAACACACAAGAATTTGCTGGAATTTTATTAATGTACCCTGGGA  
AAAATTTTTTTTTTTCAACCATTGTGTTAATTTTGCATCTTTAATTTGGAGGCTATAGCTTCCACAAGA  
AAGTGTGCGATAATCCACGAAGGTACCTCACCTTGGTAAGCATTAAACGATATTCCTACAATGGAAGACC  
AGTGAATATAATGATTTTTT

>Negative Sample 184

TTTAGGTCCTGGTTAATGGCGAGACATTTCAAGTTGTTGGGTGCAAAGATCAAACCCAAGATAGTATGAGT  
CTAAAGACATTGTGTTGGAACCTCTCTTGTCTGTCTCTGAATTACTGAACACAACATTAAGTACTAAT  
CTCATCCTCCTTTTGTTTTTCTCGAGAGGGCCCCCTTATTTCGTCGCCTGAGATTGCATTGGCCGAATTG  
AAAAGTGACAGTTATGCACCTCAGCGGCTATTCCCTGCGTCGCTTGTGTAAGATTGAGGATTATAGGAAG  
TAGTAAGCTGGAATGGTAA

>Negative Sample 185

CCACCGACATCGAAAACCTTAAACAACGAGGTGCAAACATTCAGAGCTTCTTGTCCATCGTGTACCCAAGA  
GTGTGAAACTCATATGAAGCCAGTAAATATCCCACACTTTAAAGAAGTCATTATCATGTCGACGGTCTGC  
GATCATTGTGGTTATAAGTCTAATGAGGTGAAGACCGGTGGTGCCATCCCTGACAAAGGAAGAAGGATTA  
CTTTATACTGTGACGATGCAGCTGACTTGTCCCCTGATATTTTGAATCTGAGACCTGTAGTATGGTAAT  
TCCTGAATTACATCTTGATA

>Negative Sample 186

AAAATAAGGCCATCATATATATATATGCGGCTGCGTGCCTGATTCTCCCGGATAATATGGTGCCTTGC  
AATTGGAGTATTGGAGAAAATTTCTTTTCCCTTTCATTACGGCGGAAATACTTCATATAAAAAAAGA  
ATACAATCAGTCTTTAAGACTATACGCATAAGCATTCAAGACACATAGAAACACAAACCTATTTTTTAA  
TGTCAGCATCAGCTTTTAATTTTGCCTTTAGAAGATTTTGAATAGTGAACAGGCCCTAAAACAGTACA  
CTTCTGGGCCCAACTTTGA

>Negative Sample 187

TGCGTTACTGCAGCAGTACGCGCATGTTCAATCATGGAACGAGCATCTGCTGTAAGCCACTCATTGCAC  
AACCAATATGACGATCAATCTCCACGATTTTCTCAATAGAATCAGATTCTAATAGTGGTGGAGGTGGCAG  
TTTCTCCACACCTAGTACAACACCTTCTTTCGTGGCAATACCAATTGCTGTAGATCCTAATTTGATGGCC

TCCAAAGAATACTCAACTTGGGAATAACCTCCCTTCTGGGGAAAATGTGCTTACACCACGATCATATTAC  
TTCTAGTTAAGAACATCCTT

>Negative Sample 188

ACATTCAAAGTCTGAAGAAGCTTTGGACTTGATTGTTGACGCTATCAAGGCTGCTGGTCACGACGGTAA  
GATCAAGATCGGTTTGGACTGTGCTTCCTCTGAATTCTTCAAGGACGGTAAGTACGACTTGGACTTCAAG  
AATCCAAACTCTGACAAATCCAAGTGGTTGACTGGTCTCAATTGGCTGACTTGTACCACTCCTTGATGA  
AGAGATACCCAATTGTCTCCATCGAAGATCCATTTGCTGAAGATGACTGGGAAGCTTGGTCTCACTTCTT  
CAAGACCGCTGGTATTCAA

>Negative Sample 189

ATCACATGAGTCGACTGAGCTCTCTTGTGGAATCAGTCAAAGTTTCAAAGGCCTTTTGAATAATCTTG  
AAAAAGCCATCTTGGTCCAAACTACCACCAGCAGCAGATTGCTTGTCTGGATGGTACTTGAACAATTGTT  
TTCTGTGAGCCTTGATGATTTGACTTTCAGTAGCTCTGAAACGCAACTTAGACAAACCCATAGCAGCATA  
CAAATCGGCAGTTTTCCAGTCTCTAGCATCATGAGTCAGTAAATCTTCATCGGCCAATTCAGTGTGCAAT  
AACAACTCATCTGGGTCGAC

>Negative Sample 190

AACGACTTCCCAATCATGAGGATCCGAACTTGGTGTGTTTTTAGTAATCTCTTTGCAAAACTGAGTGAGT  
TGTTTCGATAAGGAACGTTTACGAGAAAGTCTAAAAATAACAAGAACAATACTGGTCCCCAAAACAGGA  
CAAGAAGTGAAACCATAAGCGGGTAAATCCAATTGTTGGAAAGTTTCCACCAGACGCTAAGTGGTAGCCA  
TAATAGCATCCAGATGCGAAACACTAAGGACTTGTAATTTTATAACAAAACCAGGTAAAGCTGCTTCTG  
AAAAGATCTTGAGGTAGAAC

>Negative Sample 191

CGAAATTAACAATAGTATGTTGATTGTTATGCTTTTTGACAAGAAATCCATCAATATAAACAAAAGATTG  
TCCAGTTTCCGTCTTATCATCATCTAAGAATGTAATAATTAAGCTACTCTATTGAGAAGAAGCAGAATCT  
GCGCTATGCAGGTGCAAATCTCCAGCAGCAGCAAAGAAAATTCAGTTAATAAGAAATCTCACTAAGATAA  
GCGACTGTCTGTCCCAACATAGAAAACAGAAGGATGTCTCATTTCATCGCTTGATTTCCGGCCTGCAAAAA  
TAAAGCAGTCGGTACGTGCT

>Negative Sample 192

TCCGTTCTTATATCGAAGAGGCCTTGCAAGTGTATGCTGCAGGATTTGACAAAGAGTGGAAGCTGTTTA  
ATACTGAGAAGGAAGAGAGTCTTTTCGACCTGGAAGACATTCAGCTCCCCAAAGAAGCTTACCGATTTAA  
GCTTACCTGGATTCTTAAAAGGATTTTCAACCTGCGGTGTTTACCCTCTTCTTTTATTATTTTTTAATT  
GTCTACACGTCTGGAATGCTGACCTTATATCACGTTTCTTGTTCGGTAGTAATGTTTTTTTATCATGA  
CGAGAGATTTCCAAAATATG

>Negative Sample 193

TCATGTAATGTACTACTGAAGTTTCGAGAAAAAGTATGAAATATGTTAAGAAGATACTACCGCTTTACGCG  
AGATATATCAATGTGAATCCACAAGAAGAGACGATCACCTTCTTAATTGAAAAAGCCAAAGAAATGATTC  
GATTGTTGGGCAGCGAATCTGATGATAGTGAAGGTTCCATTAAGCAGACTTCCGATGAATCCACAATAAA  
AAGAATTAAGCCTAACACTGAAATTACACAAAAGTCATCCAAAGAGAACATTGAGAACGAAGAGTATGTG  
ATCAACTTGTTAAAAGTTAG

>Negative Sample 194

TTTAAGGATTTTCTTGGAGAGAGCTTGAAATTAAGCGTATAACGTCCAGCCACTGGACTACGTTTGCTT  
GTCTTTGAAACAATTCACGTTGGAGTAGAAGATATCTCTCACTGTAGTGTTTTTACCTAGCGGTAATTT  
TTCCATAACGACTTTCAATAAGTTTAAAAGGATTGCGCATTTTTCAACTGAACTGATGAGTGCATAGA  
TGCGGGCCATTCAAAGGGAAGTCCAATGTTGTGTGAATGTCAGGACTGCTTGATCGCCTTTTTTTTTTTT  
TGTTTTGAAAGACGATTGAA

>Negative Sample 195

CACGAAATCATCAAATCATAGATAGTTACTGCTTTTCTCAGAACTCCAACGGAGAAAAATAGGATATTAG  
AGTTGAAGAGGTCAGCACCCATCATTACTACATAGAATAGTCCCATGGCGAAATTAACACCAGTAATAAG  
ATTCACAATACCCGGTTTCGTGCGACTATGTCAGGATCTTCGGAATATACCGCTACCAATAGGAACGAA  
CCACTACTAAACAGAACGCCACCAAGTATGGAATTTATTAGCAATGTATCTAGTTGCAGTCTTGCTTCT  
TCATTGCAGTGGCCACCACC

>Negative Sample 196

TGATTTTCGTGGCAACACCCATGGAAGAAATAACATCTATTTTATTGTGATGGGCGTACTCTAATAGGTCT  
ACCTTAGATTCTAGATTATCTAGACAATCCACGATAAAAGTTGGGGACTCACCGTCTGCAAAAATTAAT  
CGTGTGAGTTTTCTTTAGTCCAGGCCCTTGGCCCTTGCTTTTATTTTCAGACCAAGGAGCAATTTTAGACAA  
GTGTTCTTTCAAGCATTGAACTTTGGGCTTTCCAATATCTGATAAAACTGCGCAACAGTGGGTATTCAA  
GAGTCGATAGATATGTTTTTC

>Negative Sample 197

CGGTCTCGATTTCTAATAACGGAGATTTTGTGGCCAAGAGACACCAAGGGCAGCACCAAAGTTAAGTAA  
AAAGAGACTTTCAAATACATTGGATGTTAATTGTTCCGATTATGAGTCTAGTGGACAAAATGCAACTTAT  
AATGATAGTGAGTCTTCCCTTAATTAAGATTAGTTTACTTTTTCTGTAGAATGTTAATTAGTTTTATT  
GCATAGAAAATCTTTAATACTGAATGACAAAATTTCCACAATTTTTTTTTAAAAAATTATCGACAACCTGC  
AGGACTCGAACCTGCGCGGG

>Negative Sample 198

TCACACACGTCTTTCCCTGAAACGCTTGAGAGGAAGATTAGCCAAGGTATATAGCAGCATTATTTTCGTTT  
TTTTGCCGGTCATCTTCTAATCATCCAAATAATATCCTTGATTAGATAACAATTGCTTATCTACGTATA  
TATATACATAGCACAATCTCGAAAATATAATACTAATAACAAAATAAGTATTTAAAGAAGGGTTGATGAA  
GTCCTAGAAGTACCAGACCTGATGAAATTCTTGCGCATAACGTCGCCATCTGCTAATTTAATTGGGATTT  
CAAATTATCCAATTGCTTCA

>Negative Sample 199

TTTTGATGGCGGCTTCTTTTTAGGGCCCGCTAGGATAATTCCCACATGGTCATTCTGTTTTGTCTGGTG  
TGCAAGCATAGCAAAATTTGGGTTTGCATTGAAGCAAGTTTCTGCATCTTCTACTAGCGCCACGATCCAC  
TCTGGCCCAGTATGTAAAAGAGCAGGAGGCTTTATGAATTTCAAACCAATCGTTTTTTCATAATCAGCAA  
TCATCTCACTCGATATACTTTGTAATCAGCCATCGGAGCTTTGAAGCTAATTAGTCCCTCATTAATTGT  
TATTGGAACAGCGCCTATTT

>Negative Sample 200

TACCGCAGGGGCATTTGTCGTCGCTGTTACACCCCGTTGGGCAGCTACATGATTTTTGGCATTGTTTCATT  
ATTTTTGCAGCTACCACATTGGCATTGGCACTCATGACCTTCATTTTTGGAAGTTAATTAATTTCGCTGAAC  
ATTTTATGTGATGATTGATTGATTGATTGTACAGTTTGTTTTTCTAATATCTATTTTCGATGACTTCTAT  
ATGATATTGACTAACAAGAAGATATTATAATGCAATTGATACAAGACAAGGAGTTATTTGCTTCTCTTT  
TATATGATTCTGACAATCCA

>Negative Sample 201

GATTTAAGGTTTCGATAATCCCACCACCTTCGAGCAATCGCAAGAAGGAACTCTAGCTGGTAAATGGAC  
ACAGAGTTTAGCTAATGAACTACACATGAACTATATGGGAAGTAGGTGATTTAGTTAGCAATCCGAAG  
AAGAAATATGGCTTTACTAAATTCACCGCAAATTTGAATGAGATAACTGAAATTGAAAAGGGCAATTTAC  
CACCTACGGACTCAAGATTAAGACCAGATATTAGAGCTTACGAGGAGGGAAATGTTGATAAGGCGGAAGA  
GTGGAAGCTGAAATTGGAAC

>Negative Sample 202

ATGGGAAATGTAACCTTGAGACGGGTTTAGCTTGTGCCAAATTATCGTTGTAACCGGCGGTACCAGGAGCA  
GTCGAGTTTCTGACTTCTCGTTGTATGAGTTAGAATTTGTGCTCACAGTAGCAGACCCTTCCAAGGGGC  
CTTGATGAGCGTTTTCAAGTTCCGACATTCTTTCTTTACCTCTAATATATTCTTTTTTCTAGAAAAATAA  
TATTTTTTGTGTTTTAACAAGCTATGAAGTAAATTGCAAAGTGAAAGCGAATCTTGTTGCGTATA  
TTATATATAGAAAAATTATT

>Negative Sample 203

GCAATAATGATTGGTAGTTGCCAAACATTTAATACGATCCTCTGTAATATTTCTATGAATAATTATCACA  
GCAACGTTCAATTATCTTCAATTCGGCTTCAGTACTGTATGAAATACTCGCTAACATTTCTTTATTCTA  
TAATAGCACAGTGACACTTAAACGTCAAACGTGGCGCACATTAATATACGATGTATGCATTTGGCTTGAC  
ACTGCTGTAATAAGGAACATCATCATCCGTCAACTAGTAGTCACATTAGTAGTGTATTATCACATGGTGT  
GTAAGAACATTACGTAAAGA

>Negative Sample 204

TAAAGAAAAAAGCCTTCTGCCAAAGAGGTTAAGAAACAACTGTAAAAGCCCCAAAGAAACAGACAGCT  
TCTCCTTTGTCTTCTTCGACAGAAGAGCCCAAGAAGAAGAAAAGTTTCTTCGGCAAATTTGAAGAAGC  
TATTTAAGTGAATTATCTAAGGATTGGTCTCATGTTGCCGAATCATAGAAATATAAGAAAAAATTAATAA



AAAAAAGAAAGAAAGTATAATACTAATATTGGCAATAATGCTAACACATTACTAATAATAGCAATAATA  
TTAATAATAATAATAATAAT

>Negative Sample 205

AAAGAACTGGCTACTAAAGCGGAAAAGATATTAGCTAGATTTAATGAACTACCAAATTATGACCTAAAAG  
CGGTTTGCACCGGTTGTTTCCATGATGGATTTAATGAGGTTGACATCGAAATATTGAACCAACTAGGTAT  
AAAAATTTTTGACAATATTAAGAAACGGATAAATTGAATTGATTTTTGCTCCAAAGATTTTGAGAACC  
GAGAAATTTTTAAAAAGCTTAAGTTTTGAACCGTAAAATTTCGCATTGAAACCTGAATTTATTATTGATT  
TACTGAAACAAATTCATTCT

>Negative Sample 206

GTGGATTCTCGAGAAAGCAGATGGCTTCCGTCGTTATTGAGCAACATCGAAAACAAAACCGTTATTAATG  
CTGCTCTGGGGTTTGATAGCTACTTAGTTATGAGGCATGGTAATAGAGATGAACAGTCTTCAAAAACAACT  
GGGCTGTTATTTTTGCCATGATGTGGTAGCACCAACTGACAGTTAACTGACAGGACTTTGGATCAAATG  
TGCACAGTAACTAGACCCGGCGTTGCTATGATGGCCTCTTCTTTAGCAGTTGAATTGATGACTTCCTTAC  
TACAGACCAAATACTCTGGT

>Negative Sample 207

CTATTTATGAATTTGGCGTTTGGTACTACGAAAATTGTTTCAGATATGAAGGATATTTTCGAGAAAATACC  
TACAAGAATCTTTGTCCACTTTACAAACTATCGACACATTGAGTTTTTCGGAAGAATTAGAAAAAATTAG  
AAAGAGAAGATTTGATAAGTTTTGGGCAAAAACCTAATCCTGATCCAACAACAATATTCAAAAGTTTGT  
AATATGAGAACAGGAGTAGCAGGTTTTAATGATTCCTTAATGAATCACTTGTACGGGAAACTAAGTTTCG  
GGTAGCGCCAGTTGAAGAA

>Negative Sample 208

ATCGGTGTTTTGAACTTTTTGATTATTTGTTTTCAAGTGGCTTTAGTTAATTATGTACACTTCGTTTCTTT  
TTTCTACTCTTAAAAGTGAAAAAATGAAAAATCAGCGGCATGTATAGCATAACAGATAATAGGAAAAAGG  
TTGTGAGTTATCTTCGAGACTATTCGACTCGTATTCTAAATTAGAATTCAAGTAGGTGGATAATGTGA  
CAAAATGAATGAAGTTAGAGCTTTACACAGAGTATTATCCTCGGCGTTTTCTATCAAAGCTTCTGGTTA  
TTCCATACTTTTTTCAAGGA

>Negative Sample 209

CAATGGAAGAATCCAGAATGCCTAAAACCTAGTTATTTAAACAAAAATTTTGAATCTGCTCACTATAATAA  
CGTACGTCCCTCTTACCCTTTATCTTTAGTCAATGAGATAATGAAATTTACAAAAGGCACACGCAAAAAGT  
TTGGTTGATATTGGATGTGGCACAGGAAAAGCAACTTTTGTGCTTGAACCTATTTTAAGGAAGTGATTG  
GGATTGATCCTTCTTCTGCTATGCTTTCGATTGCTGAGAAAGAAACAAATGAACGTAGATTAGATAAAAA  
GATTAGATTTATTAATGCGC

>Negative Sample 210

TATAGCGGGCATTATGCGTAGATCAGGACTTAAATTTTTTCATTGCAGAAGTCCAATTTTCAGACTCAGTAT  
GGTTTGTGTAGTGCTGGTGTAAAAGATGGTGTATTACTTAAGACTGATTTGGTTGCTCAGGTATTTCA  
TTCAATAAAATTGTGAAAGAGAACCTGGAATATAGAATGGAAATATATATCCTGCTACTAACCCCAATGG  
AAGGTGACGATCACTTCTTGTGCGTTCCAATCCAGTTTTTGAATGTGCGAGTGGA AAAAATTCTAGAGGA  
ACAAATTGATATTTTCAAAT

>Negative Sample 211

TATTACCCAAGAAGTTATGGCTTGTGGTAGGCCACAAGGTACAGCCGTCTACAATGTGTGTGAATTTGCT  
AACCAATTCGGTGTCCATGTATGGCTGATGGTGGTGTCAAACATTGGTCATATTACCAAAGCTTTGG  
CTCTTGGTTCTTCTACTGTTATGATGGGTGGTATGTTGGCCGGTACTACCGAATCACCAGGTGAATATTT  
CTATCAAGATGGTAAAAGATTGAAGGCGTATCGTGGTATGGGCTCCATTGACGCCATGCAAAAAGACTGGT  
ACCAAAGGTAATGCATCTAC

>Negative Sample 212

GCAATAAAGTGTGACAAATTGGTAGCATTGATAGTTATTCCCAATTGACCCATAGGCTGTTGAAATGAAA  
CCATCAGTATATGTTGAAACCTCAAGTGAGGCGTCAACCTCTAAGTGAGGCTTCAAGCTTCGCCAACTAT  
TATATATGCCACATGACTGCAGGGTCTTATTTTTAAGGAGCTAGCTGCAACGACTTTGTGCTGTAAAGGG  
GTGCAGCAGCAAATGTAGCCTATTTGCTCGAGGTTTTTCTTTCTTACGAGAATGCTAGCAATTCAAGATA  
GTACGTTGTAATATGATGCA

>Negative Sample 213

GCCAAATAGTACGCCTGGTAATATAAGTAGTTTAGAGTTTGGTCAATCTGTGATGACTTTAACTGAGCGG  
CAATGTACAGTCTATCGGACCTTAAATTTTTATAGTTCGAGGTAAAATAGACCCCTGTCGTTACAGCCAG  
AATAATCAGTGAGCCCAAAGCCACTATACTAACTAGTGCCGTTAGTTGAGTTCGGATGCCTATCCTAAAC  
GGAGGAGTGAGTTCCAATTTTGATGGCAGGCCAAATCGCATTGTATTGTTAAATCAAAACAAAGTAGAT  
TATACCCAACGTGTTCTTAT

>Negative Sample 214

TGAGGCAATACGATTCGTCGATACAAAATTTAACCAGATCGCGTAGTCAATTGGGTCATAATGTTAATGA  
TTCATCTCTAAAAATTAACATTTTCAGAGA ACTTATTAGACAGAGATTTTCATGAAGGTATCTCCTACGAG  
CAATTGTTTCAAAGGGATCTGGAATTAACGAGTCTATTAATAAATCTATCTTAAAATTAACGATGAAA  
TTCAAGAAAGAATAAAAACCATTGAGAAAGACAACATAACATTAGAAAAAGATATCAAAA ACTTTAAAGCA  
TGACATAAATGAGAAA ACTC

>Negative Sample 215

AATAACTCCAACCCAGATACCATTAACAACA ACTTACAATAATGTTAGTGGCAAAAACAATAATAACAATA  
ATATTACTAACAATAGTAATAATAATCACACAACAACAACAACGACAACAACAACAATAATAATAA  
TAATAATAATAATAACAATAACAATAGTGGTAATAGTAGTAATAATAATAACAATAATAACAATAAT  
AAAAATAATAATGACTTCGGCATTAAAGATTGATAACAATTCACCGTCTTATGAAGGGTTCCCCAGTTAC  
AAATACCGCTTTCACAAGAC

>Negative Sample 216

ATCTCTGCTGGTTCGGTACTTAAATTGGAGCTACAGAACAAGAAAGGTTAAATACAACAGATGGATTAAAG  
AACAAGAATTACAGCTGATGGAGAAATATAAAGGTGATAAAAACAAGGTAGCAGAACTTATCACTCTAA  
TTCTCATTATGCATTCAATTTAGTGGAGGCAAGGTTGCATCCAGCATTTGTGACACTTCTTCTCAGTAGC  
ATTGGCTTTACTGCCTTTGGATGGTGTATTTTCGGTGAAAACACCGCTTGCTGCTGTATTATGCACAAGTG  
CATTGCAAGTTTATTTTCA

>Negative Sample 217

TTGAAAATCTTTTCTGTTAATGCACCGGAAACCGAGTTCGACAAGTTCCCATCTTTGTTAGATGTTTCAGC  
CATTAGACATGTCGAAATATGGGTTTTCTAAAAATGTTCAAGGTATCAAATCACCCTTATGGTTCGAG  
CGACGGTGGTAATGCTGTCGGCGTTCGCTTTTATGATTAGTACTGCTGTGAGAATATACCAT  
GGCTATGCATTAGATGGTGTGAGGTTTTATTACAAGGAAAAACCAACTGGAACAAAGGATGCTCCCGCAT  
CCAAGCCCTCTGTACCACCA

>Negative Sample 218

CTTCATGAAATAAGTAACCCTAAATTTTTATCACAACTTCTAATGTTCTTCAATTTTCTGTAAAGAAAGA  
GCAGGACTGTGGCAGAATAGTACCATTTTCATCAGCAAATGTGAGGCTATGCCATTATTTGCGAATGCTA  
TGAACCTACTGCGTTGCATTCTCCAAGGTTCCCGCTGGGTGGGTGCCACTAACTCTTCCGTGTGGCCGT  
CTATTGCTGATGCATTCAAACCATAGTCACCTGCGATAGGGTTAGTTGTGTAAGAGGTA AACAGTGACC  
AGGTGTTAATCTTCCCAGT

>Negative Sample 219

AATCTGCCTTAAAGAAATGGGGTGGTA ACTGGGAGATCAATGCTGGTGATGGTGCTTTCTACGGTCCAAA  
GATTGACATTATGATTTCTGACGCTTTAAGAAGATGGCATCAATGTGCCACCATCCAATTAGATTTCCAA  
TTGCCAAACAGGTTTCGAATTGGAATTTAAATCTAAAGATCAAGATAGCGAGAGTTACGAAAGACCGGTCA  
TGATCCATCGTGCCATTTTAGGGTCTGTTGAAAGAATGACTGCCATTTTGACCGAGCATTTTGCTGGTAA  
ATGGCCATTTTGGTTATCAC

>Negative Sample 220

AAACTATGAAGGCGTAGCCTTTACTCTTCTGGGTTATCTTGTCCCTTACTATCCTAATTTTTTCGATCTC  
GCCAACTTAACAAAATACTTTTGCAGTTCAATTTTCGTCAAGATCGTATGGTAGCCTCCCAATAAATATC  
GTTCTGTAGGGATCTGTGTCCTTGATATGAGGGTCAACGTTAGGATTCCAATTTTGTAGTCTCCGGTCTA  
ACAATTGAGCATTTTTGATCTTGGAAGTTTGTATGCTTTCGTATCTTTGGAGATGGTTGTTTGGAGATCC  
TTCAGGAAACTCCTCCATAT

>Negative Sample 221

TTTGCTGCTATATATACGACTTGGCTGTAGAGAGATCTACGTAGGATGTGTCCACTATCAAGGGGGGTTT  
ACCAACGTTATCTTCTATTTTAAAGTGCTCAAATGAAGGTTGCATTATATCCCTGGCAGTTTTCCCGCAA  
TTTTGCCGGCCGCTTATAATAGTCATGGTGAAAGGATTGTTGCTTGTGTTGCAACATGACAGTTGC

CTACTAACTAAATAATAATCAAAGTCAGTTTCTCAACAATGGAAAACCTGTTGTGACCTTATCGAAGTAA  
CAACATCGTATAATAATTA

>Negative Sample 222

CCAGAGTCAAGAAGCTTATAAACCCAGAAATATGGCTCCTCCAACCATTGTGACATCAGTTACGCCGCT  
GAGACTTTCAGGTATCACGTGTAATAAAATATCACCCAGGAGTGTTCCTAGAGAAAAGGAACTAGTAAG  
GACAGTGTCAAGCTGGCACGATCGTTCTTGCGCAGTCCAGGAACAAACAGTACGAAAAGACACGGCATAA  
GTTGTATGATTAGGATAGCCACAATCGCATTGTAACGGGGTCCCAGGACAAAGAGGTGGTTCTGCAGAAA  
GCAAACCTAGAGAGTAAAAAA

>Negative Sample 223

CAGCCAAATCTCAAGGTTTGGTTGGTATTGAACTATTATGTGGTATTGTTTTCTTTGATGAAGAATGGAC  
ACCTGAAAATGGCTTTGTACATCTGCTCAAAAATTAAGAGAAGAGAAATCTTAGCCGCTGTAAATCA  
GAAGTCGAAAGGGTTTACAAAGAAAATCTTAGAGAGAAGCTTATTACCTTCCCCTCCATCTATGCACG  
GTGTCTCGTACTTCCATAGAGCACCGATTAGTGAATACTAAAACCTATGTGCGTGATAAATGGTTCTCTTT  
TACAGATGCGGTAAATCAAT

>Negative Sample 224

CAAATTC AATATAGCCGTAGCCTTTTGGTGTTCCTTATCATAAAGAAGTGTATTCTTTTTAT  
CTGGCCACAGTCTTTGAAATGATCTTCTATTTGCTCTGGGGTGACATCCGGAGTGATGTTACCGACAAAG  
ATAGAACGCGAGTCAGCTTCAAGTTGATGAGCGTGTTTTTCTCCTTGCTTAGCTTTTGCACACCTGTG  
GAGTGCCCTCGATAGATAGTTTACCCACAAGTTCATCCAGCTCGAGCTCTTGCTTGTCGTTCTTTTTATT  
GTTTCGAAATTCAGTCTTTA

>Negative Sample 225

TGAGAAATTTGAGTGTGGTCCTTCGCAAAGGCATCTTTTCGTTAGAGGCAACGGCCTTACTAAAGAAAGG  
TTTACTCACATCAAGCTGAAGATGTACCCCGATGGAGGAATCGCCAGATTTAGATTATACGGAAGAGTTG  
TTCCTCCAGAACTCAAACGAAGGATCATATAATTGACTTGGCTTATGTTTGCAATGGTGCTGTGCGCTTT  
AAAGTATTCTGACCAACACTTCGGTTCAGTTGATAATTTGCTACTGCCAGGTTCGAGGTCATGATATGTCG  
GACGGCTGGGAAACCAAAAAG

>Negative Sample 226

ATCTTGACAACATACTCCTATTCCATTTATCACTGTGGTGTTAAGAACCTCATTCTTTTGAAGACGG  
TAGAAACATCCTGTGTGCATATATTATAATATCAGCCAACTTTTGAACAGGAACTTAACATAGGAACT  
TGCGGAAGACCCTAAAACGGTCAATGAACACATCAATGATGACAACAAAGAGAGGATGGAAATCAATTGC  
ATATTGATAGCTTTGCGTTGTCTTCAAATATCCTTATTTTCGAAAGAGACAAAATTTAACAACCTGATCAA  
CCAATGAAAAAAGAGAACAA

>Negative Sample 227

ACGCTAGATCTTTGGGCTAAAATCTGCGTCAAACAGGAAATATTGCCTATTTTCGTACAAGGTTACTTCC  
TAGATGCTATATGTCCCTTTACATAATAAATTA AAAAATTTTTTTTATAAATTATAATAATTTCTTTTTA  
TTTCTAATAGTATCTTGGGATTAATAAATCACTTACAATATTTATTTTATTATATTGCTTTGTTCAATT  
AAATTTTAATACGAAATTTAATTGTTTTGTATTTAAAATATTTTGAATAATAAATAATATAGAGTT  
TTATTATAAATTTTTTCATTG

>Negative Sample 228

CACCACATCCTTGTCCGGGAAAAGAAAAGGCATTCAGGGAAAATACTCTATAAACACCGGCGCTTATGC  
GCTGGTTTTTTGTTACAATCTTCTCGTTATTTTCTTTGTGCGATGGTTTGTATACGATAGAGGTATCAGG  
AGAAATGGGGGATTTTCAAGATTTGAAGAAATCAGATTAGGAGACGATGGGCTGATAGAAAACAATAGGA  
CCGATAGAGTTGTCAACATCATTGTAAGACTAGGATTATGCATTTCTTTAATCACCAAGTCTGCGTTTTCA  
ACGCGCGAAGGCAGGTACAG

>Negative Sample 229

TTAACCTGACCTAATATTAACAAAAGTCCAAGTGACGGCTTCTCCATCAAACAAGATAAATTACCAAACA  
CAATGGTTCGAATCTAAGAATACTGAATTATCGCAAGGAACATGGCTCAATAAGCCAAAATCTGTTTTTCA  
AGAGGCAGGAAAAGTCACTCTGGAAACAGATGAAAAAACTGACTTTTGGCGTGAAACATTTTACGGATTT  
ACCCGTGATAGCGGTCAATTTTTTGGGAGTAGAGACAGGTAGTGCTTTTACTGCACAAGTCCGTGTTTCAGG  
GAAGCTACGAGAGTCTTTAT

>Negative Sample 230

GATAAAATTGATGCCACGGTTAATTTCCCCATTACAGATTTGGATCTGTGCGAGGTACGTTGTCTATAAAG  
ATGATCCCAGAGGTTAATCTATGACCTGTATGCAGTAGATAACCACTATGGTGGTTTGGGTGGTGGGCA  
CTATACCGGTACGTAAAGAATTTTGCCGACAATAAATGGTACTATTTTGATGATTCTCGAGTAACTGAA  
ACTGCGCCAGAAAATAGTATAGCTGGATCGGCTTATTTGCTATTTTACATTGCGCGTCATAAAGATGGCA  
ATGGATTAGGCAGCTCTAAA

>Negative Sample 231

TTGACATGTGCTGCTGAACATTCTAAATCTTTAAGTAAGGATGTGAAGAAGACAATTTTGGGCGCACCAT  
TCTGTCTAGAAAGGAAGGACAAGCTTGTGAGTACATTTCCAACCAATCACATTTGCGCAGCTTAATAAG  
AACAACACAAGCTGTTGATATCATCAATGGTGGTGTAAAGCTAATGCTCTGCCCCGAACTACCAGATTC  
TTGATCAATCACAGAATTAATTTACATTCTTCTGTGGCTGAAGTCTTTGAAAAGAAACATAGAATATGCGA  
AAAAGATTGCTGAGAAGTAT

>Negative Sample 232

ACAACCTCATCATTATTCCTATTGTCACCATTCTGTGCTCAGTTTTCACTATATCTGAAACGTAACCTATTT  
CCATTGCGCCACTAGCGCAAACAAGCCACCGAATGATGGTACGATACACGCAGTAAGAACAATAGCCCATT  
TGTGATACTTCATTTTCGATGATAGGGTAAAGACGTGCGTAAGAAGCCCTATGACCCTGATGCCGCTCAT  
GTATTTGAAAACACGCACTCTTCTATTCTATCGGATAATTCTCCCCACTTACCAGCCATGAAAATACTG  
ATTGCCCTGCTATCATCAT

>Negative Sample 233

TTACCAATCTGAAGGTTTGGCAGCATTTTATTATTCTTACCCAACCACCCTAGTAATGAACATCCCATTT  
GCAGCATTAAATTTTCGTCATATATGAATCATCCACAAAATTTTTAAACCCATCAAATGAGTACAACCCCC  
TCATACATTGTCTGTGTGGCAGTATCAGCGGATCGACATGTGCGGCGATCACAACACCTTTAGACTGCAT  
AAAGACAGTACTGCAGATAAGGGGCAGTCAAACAGTTTCGTTGAAATTATGAGAAAGGCGGATACTTTT  
AGTAAAGCAGCCAGTGCCAT

>Negative Sample 234

GAGTTGCTATGGTAACAATCTAATGCTTACATCGTATATTAATGTACAACCTCGTATACGTTTAAAGTGTGA  
TTGCGCCTATTGCAGAAGGAATGTAAACGAGAAGCTCAGACAATACTGAAGCTGTGTTAAAGACCTATT  
AGTTGAACATGTTATGGTAGGTACATATATGAGGAATATGAGTCGTACATCAATGTATAGTAACTACCG  
GAATCACTATTATATTGGTCATAATTAATATGACCAATCGGCGTGTGTTTTATATACCTCTCTTATTAG  
TATAAGAAGATCAGTACTCA

>Negative Sample 235

GCACCGTACACGAAAATGAAATTAATAAAAAAAAAAATGTTGGAGCACAAGCAAGGCAGCATCAGAACGTACCG  
TCAGTTGGTACCAAGACAAGTCCATCCCCGTAGGCCTACAAATTATGGGAATGAGAAAGTATACAAAAT  
ATAAACTGTCTTATCATGAAGAAGAGTCGCTTAGGAATTTAAACTTTCAAATCGCATTACGCAATTCTCT  
AAAAACGCGAACCTTTCCCTGATATGTAATCAGGGAATTTCTCAGAATAATATTCGATCTAAGAAACCG  
GAAACGAAATGAAAATTGTT

>Negative Sample 236

GTATCCTAGCATATTTAGAAGACATCACAAAAGTAGTTCATCTGAGTCGTCATTATTAATTCCTTTTTT  
GGTAGTGGAATAGGCGAGGAAGCTCCAACAAAGCCTAATCCACAAGGTCATAGTCTGTCTAGTGAAAATT  
TAGCTAAAGGAAAATCTAAACACTATGAACTAATGTGTCTTACCTTTAAAACAATCTTCACTACCCAC  
TTCGGATGATAAAGGTAATTTATGGAATAAATTCAAAGAAAGAGCCAAATAGGGGTTCTAGCCCAAAT  
ACGGTAGCTTATGTAACGTC

>Negative Sample 237

AAACGATGATGATTCTAGCTCCTCAGGTTCTTCCACAGAAGACGAGTCTAGTTCATCTTCTCGTCTTCT  
GATGAGGAAACTTCAACATCCAGGAAGGCTAGAAGAGTTGTTGTAATAACACCAAGAGAACCAGTTAGAT  
CTTCATCTAAGATTGAAGCCCCCTCTCCATCTGTAAACAAAAAATCAATGCCACCCCTGATAAAATTCC  
AGTTACACAGCTAATGGACATGTCGTCTCCTCCGTCAGTTAAATCCAAGACCACCTCAAATCCGTCTAGT  
ATACTTCATGACCTTCCAAG

>Negative Sample 238

TGAATATGCCAAATCCCAGTACAGCTTAAAAGAAGTCATTGTGGGGCGTATATATTTCTTTTAAACGAGA  
CTAAGGATAAAACATATGGAATTAAGCTTGATCACAAGAGAATCTTCCGGCCTACAACTTCTAATGTAA  
TGACAGATTCCTACTGCTATCCGATACGAAATAATGGATGGGTCTTCAGTGAAAGGTGAAACCATACCCAT

AAGATTATTCTTGAGCGGCTATGACCTGACGCCCAATATGAGCTGCAACTACTTTAACGTCAAGAATTAT  
TTGAGCTTGGTTATTATCGA

>Negative Sample 239

TAACAACACGGTGTGCTGTGAATGCTATCACTTGATTATACGCCAATAAACTTCATATTCTTTGAAGAGCCG  
CTGCTATTGCATTTAATGCTAAGGAAGGTTAACAAAGCATTAAATGAAGAATAACTACAGGAGTAGCCAAA  
AAAATCTCCGCGACGGGGAATTGAACCCCGATCTGGCACGCGACAAGCGCCATTCTGACCATTAACCTA  
TCACGGAAGAAACAAAGCACTCACGATGGGGGTCGAACCCATAATCTTCTGATTAGAAGTCAGACGCGTT  
GCCATTACGCCACGCGAGCT

>Negative Sample 240

ACTGTTCAAGTTATTGAATAGCATTATATATTAGTGCCAACCAAAATATGAAACCGATGCTTCCAAGTGT  
CACCCCAAGAAGACACGCAAAAGGTGCTACTGCACATAAATCGGCCACTCCTTGAGCTAGACCCAAATTCT  
AACAGACTTACAGTTAGGATTCTCTTTATTCTGTCTAGTCGTTTCTTTTTTCCCTCGCTTCTTTTTCTT  
TTTCGTCTTCTACCACCATTTATAGTAATTCGATTCTGTTCTCTACTGAGGTTTTCTAAAGCATTAAAC  
TACCTTGCCCCTGGAGACTT

>Negative Sample 241

GAAATAGTCATCAGACTTAATAAAAAGCCGAAATTCAAGGTCGATAATGTAATAGGATAGGGTGTGTAATG  
ACAATGTATAAAAAGGAACGAAGACAGAGTAATACTATTATGTAAGAAATACCGATTCCCTTGTGAGTATA  
TAAACATAACCATTTTATTAATAAATTTATTCAATGGTATGTATGATATTATAATAACATACTTATACT  
TGTCTCACTCTGTTTATAAACGCAACAATACTACTTTTGAATATTATCTTTAATAAATACACTTAGT  
AGTTACCAATAAATAATAAAA

>Negative Sample 242

TAAATAAGGATAGGTTCCACGAGCTCTGAAGGCAAATTATAATTTGAAGAAAAATGGTTGATTAAATAAAA  
GACATCTAACGAGGTCTTGATAAGTCAGACTCTTTTTTCCATCAACCTTTTCTGCCTTGTCAAACCTTGAT  
AATTTTTTCTAAGACCACTCCATCAGTTCATCAGGAACATTTTCCATTGAGGCCTTGTATTGTGTAATAA  
AGTTCCCAAGAGCTTTGTACTCTTCTGGATTATTCCTAATAATTTGTTTGTGAGCGGGAAGTGAAGGTT  
TTAAATCAAGATCACGCAAA

>Negative Sample 243

GACTCTGAAAGCCATACCGGTCAACTTACCTTGCAATTCTGGCAAGACCTTACCGACAGCCTTAGCAGCA  
CCGGTAGAGGATGGGATGATGTTACCGGAAGCGGTTCTACCACCTCTCCAGTCTTGTGGGATGGACCGT  
CAACAGTCTTTTGGGTGGCGGTCATGGAGTGAACAGTGGTCATCAAACCTTCTTCAATACCGAAAGCATC  
GTTGATAACCTTGCCAATGGAGCCAAACAGTTGGTGGTACAAGAAGCGTTGGAAACAATCTTCAAGTCA  
GAAGTGTATTTTTCTTCGTT

>Negative Sample 244

TAGCTTTTCTATATATATTAATCAGGCCCTTATCCTTAGAGAGCTCGTTAAATAGTTTACAATTCAAAG  
ATCTAACTGAAACTTCCAAATGGGTAACAATTCATTCTGTAACACATTAAGATCTTCATCTGTAAA  
TCGTTTCATCTGTGACTGTTGTTTACTCATAGGGATCTTGTTCAAAAATTTGTAGAGATTAACGAATCCTG  
ATAAACAATTTGCATTTGTAATATAAATTCATCTTTAAAATCGACATTTAATCTGTTTAATTCCTGGAA  
AATATACCTGTTCACTCCAT

>Negative Sample 245

GTCATTTAAAATCCAGTTGTTATTTGATAACGTAGTCTCAAATGTTAAAGAAAAGACGTCTTCGAAATTA  
TCCTCTGTGTAATTGAGCATTTTTATTAAGTTCCTACTTGTCTCCGGAAACAATCCGAGTAATCTTCAA  
AACTCAGAGGCTCTGAGCATAGTTTTTTATAAAGCGCCTTTGGAAATTGTAATCTAATATGGTACTGTT  
GAAAATCGCCAACCCCATGACAACCTCAAACAAGTAATATAATTCCAGTTGTGAGTTTTTTCTTTTGAT  
TTGTCAAATTTGGAGGGTC

>Negative Sample 246

AGTGCGGGAAATAGACTATGCAGTGATTTAGTGTGCAAGTTTGGCCACTTCACATTCATACCAAATATTT  
CTTCCCCTCATTTTTATCGTATTAGCACTACATACGTGACTTTTTAGCTCAGCTTTCGGACTGGATAGC  
TTTACTGACTTACTTTCTACAAGCGATATCATTTCGTACAGTACTCCAAAGAAGTCTGGGCATTTAATTT  
TCTTCTTTATCAAGTCCGCCATTATGAAGGAATGTATTGGGTAATAGTTGACATACCGATGTTCTGCTGG  
TAGCATCGATGAACGAAAAT

>Negative Sample 247

TGTGGTAAGAAGACTGTTAAGAGAGGTGCAGCTGGTATTTGGACTTGTTCCTGTTGTAAGAAGACCGTTG  
CCGGTGGTGCTTATACTGTTTCTACTGCAGCTGCCGCTACTGTTAGATCTACCATCAGAAGATTAAGAGA  
AATGGTTGAAGCTTAAACTTCTTTCAATCATTCTCTTTGGCTTTCACTAGGTATATCTATTCCATAACG  
ACTATGTTTTGTATTTGTTAATTTACATAAAACCATATCAGTACATCAACGAACTGTAAAAAAGAAACTT  
TAGCATAATTATTGCGGATA

>Negative Sample 248

AATTGTAAATGGATGCGATGACTTCGATGTGACGTTACTAGTCTTACCATTGTAAAAACCACTATCGGTG  
CCAAAAGATAAGCGCAATCAACTAAGAAATTTACCACGCTCTTTGTATTGTATTTATCTCCAATTTAATC  
TTTCTTTTGGTGTGAAAATTTAGCGAAAATGTCATTGGTGAATTCGTTAACACACTACGAAATTTTAAGA  
ATTCCATCGGATGCAACACAAGATGAAATCAAAAAGGCATATAGGAATCGGTTACTAAATACGCACCCCG  
ATAAACTTTCTAAAAGCATA

>Negative Sample 249

TCCAATTGTTCCAACCAAGGCGTGAATAGCATAAATCTCTGGTCTTGCATTATGAGGACTCAGATGTGCA  
ATCATGGCCTCTTCTATAGATTTGAAAGGCCCGACTTCATCACTTGAAGGCGATATAACACCGAAGATAG  
CAAATACTAGCAAGAGGGTGAAATTTTCGCTAAAACCTGAAAACCAACCCACTTAACAACATCATTGCACA  
ACCATAAACTAGGACTCTTCTTCGGCCCCAGGAATCCGCATACCAAGTAAGAATGTAAGAGCAAATTACA  
TCCCCTGCCAGTGTTAATGA

>Negative Sample 250

GGATGGATTTGACCAAAGTAGTTTCATCTGTAAAAACGGTAGTTAAAATGTCCTTAGAGAGTTGATCTTT  
GATGGTATTCAATGGATCTTGATTGTTCAATAGATGAGTAGCATCTGTGGCAACAGATTCTAGCCCTTTG  
AAGGATGAATGACTATTTTTGTGCTAGTAGTGTAGAACACTTTATTTTGGGGAGCACTAGAGGAATATT  
GCGCCAACAATTGTGGGAGCGTCAAGAGGTCAGAAGCAGTCATTCGCCAATCTTTTGTCTCTGTT  
CCCGTTCCTACTGTTACTT

>Negative Sample 251

AGCTCCAGGCTAGGAAACAAGATACTACTGCGAAACTAGCGGAAGAAGTTACGTTAAAGATCTATTAATT  
CAATGTTAATTCAAATTTAATATACGTAGGGATGCGAGTTATTACATTGGAATATAGCAAATCACTGAA  
ATACCATCATTTTGAATACATTTCGTCATCGCCGCATCAGTTATACGTTTCTGCTATACCGTATAAGAATA  
CTTGCTTCTATTCTTAGTTATACTGAATTTTAGACATTAATAAACTACTAACGGTTGCTACTACTACA  
CTATTCTTCTACCAATGTCG

>Negative Sample 252

GCCTTGGCAGCCAAGGTGTGGATCATGGCTTTCAAACCCATGTCGACCTTACCAGATCCAATTAACTCAG  
TGACATCCGAAGGATTGGTTGGTTCTAGGATGGCAATGTCTAGACCTTGCTCCTTGAAGTAACCTTTGGT  
TTGAGCCAAGAAAATTGGAATATGGTATGGGGTTGGTTGCCAGTTCAACAAAATGTGATCTTGTCTGTA  
GACATAGCTTGGAAAGTATGTGTATTGTTGTTGTGGTATTTTTATATAATTGAAAAGGTAAAAGAACGAAA  
GAATGGACAAGAATATTGTT

>Negative Sample 253

CTATTTATCTCCAGAAGATTTCCCTTGTGAAATTGCCAGAAGGCGTCAGTTATGAAGAGGGCGCTTGTGTC  
GAACCTTATCAGTCGGTGTACTCTAATAAATTGGCTGGGGTCCGCTTTGGTACCAAAGTTGTTGTAT  
TTGGTGCAGGTCTGTGGGGCTTTTAACTGGCGCAGTCGCCCGCGCTTTTGGTGCCACCGACGTCATTTT  
CGTCGATGTATTCGACAACAAGCTACAGAGAGCAAAAGATTTCCGAGCCACAAACACTTTCATTTCTTCC  
CAGTTTTCCACCGATAAAGC

>Negative Sample 254

GTTTCCACCAGACGCTAAGTGGTAGCCATAATAGCATCCAGATCGGAAACGCTAAGGACTTGTAATTTTC  
ATAACAAAACCAGGTAAAGCTGCTTCTGAAAAGATCTTGAGGTAGAACAATCTTTTGGGATTTCGAGCTGT  
TTGAAGGATAATACATCTACTCTTCTCATTTTTAAGTTCATTCTTTTCATTTTCGGTAGTGAGATGG  
CAGTTCGAGGGGTTTTTTATTCGAGATAGTAACTTCTGACTTTTCGCTTTTATACAGCACAGCAGAAAAA  
AAAAGCCGCCGAGGCGCGCG

>Negative Sample 255

GATGATCCGATCCAAATGCCAACGCGGCTAATGGCTCAGATGAAATTGATCAGCTGGTATCATCCCTAC  
CAGATCCTTCTACTTTGGCTGGCTTTAACTGGAGCCTGTAGATTTTCGAGAAAGACGATGACACTAATCA  
TCATATTGAATTTATAACGGCTTGTCTAACTGTAGAGCTCAAACTACTTCATCGAAACTGCTGATCGC

CAAAAGACCAAATTCATAGCTGGCCGTATTATTCTGCCATCGCAACAACCACTTCTTTGGTTACTGGTT  
TGGTCAATTTGGAATTATAT

>Negative Sample 256

CCCCAGGACTAATTGCTCATCAGGGTCCACAATTCCTGTGATGGGTGTACCACCAAATTTCCACAACG  
CATGATGCCACCGCCACCAGGTCTCGTTCAATTCAGAAAGATTCTAAAGATGTAAATAAGAAGGAAGAC  
AGGCAATTAAGGCAAATAAAAATCCAAACGGAACAAGAAATAGCAAGGGAAAACAAGAGGAAACAGCAA  
CGCCAGATCTGCCTCAACAGCAATACATGCCACCACCCACCTCCAGGGTTTTTCCAATGCATCCTAA  
CTTTCCTAACGGCCCAATGC

>Negative Sample 257

AGCTACAGCGTTCACTTTGGCATCTCATGTGATTGCGAAGAGAAAACGTCTGAGAATGAAGCAATGATT  
TACACTAACGATGGTGTATACGGGAACATGAATTGTATTTTATTCGATCATCAAGAGCCCCATCCAAGAA  
CCCTTTATCATAATTTGGAATTTCAATACGACGATTTTGAATCCACTACTGCGGTCTCGACTCTATCAA  
CAAAACAAGATCTGAGTATCCATATAAAGTTTCCATCTGGGGACCCACATGTGATGGTTTGGATTGTATT  
GCCAAAGAGTATTACATGAA

>Negative Sample 258

TACTGCCGCTGCCGTTTCTCAAATAACTGATGGTCAAGTTCAGCTGCCAAGTCTACTGCTGCCGCTGCC  
TCTCAGATTTCTGACGGCCAAGTTCAGGCCACTACCTCTACTAAGGCTGCTGCATCCCAAATTACAGATG  
GGCAGATAACAAGCATCTAAAACCTACCAGTGGCGCTAGTCAAGTAAGTGATGGCCAAGTCCAGGCTACTGC  
TGAAGTGAAAGACGCTAACGATCCAGTCGATGTTGTTTCTGTAATAACAATAGTACCTTGTCAATGAGT  
TTAAGCAAGGGTATCTTAAC

>Negative Sample 259

TCTTCTGCACGTAATTGCCGTTTTTAGGATTTTTGGAGTTGTCACGGTATAGATATGTCTTATTGCGTG  
ATTTACGGTGTCTTGCACACAACATTTCCAGGTCACAATATTTGGTTCGAGGTTCCAGCAAGAATTCA  
TTATCCTTTTCAATGTGTGCGATTAATCATTATCCAAAAACAAAAGAACTTAAGAAGTACAAAAGACAC  
TTGAAGTATGCTAGCGTAAGAAATACGGTAACCAATATTTATATGTAACATGCTTATTCTGTCATGATT  
CACAGTTCAAACCTACATTCC

>Negative Sample 260

CAAGAAGATATTATCAGTTTCTCCGATATTCGTTCCGTCCTCATCTGCGCATTAAATGGCAAATTGAACA  
ACTTCTAAATCTAGCAGGTTGCTGCCTATACGCAAAGACTCAATCATCCATTGAGAAAATTTACGAAAT  
GATTGTAGGTATCGTCAATGGCTAATATGGACTCTGCTGTTAGCGTTAGGTCCTCGTTCAAAGTTTTAGA  
TAAAATTTCTTTTGTAAATGACTGCGTTAGATAATAGTTCAGTAAGTCAAACGTTTCAACACATTTAACA  
AACATTGAAGCTATTGGTAA

>Negative Sample 261

AATTTGGTCTTGTTCTTCTGGACTAAACCAATGGTTCATAGCCTCTAACGTGCCTTCGTAATCTTTA  
CGCATCAATTGATCTGCAGATGTACAGCCAGCCGAGCAGTGTAATATATTTGCTCAGGCATTTGCACAC  
CGAACATCTGTTTATATGTATCAGATGCTCCCTTAGTGAATGGTAAAAAATATGAAAGTTTCTTTCGTT  
CTTAATTTGACCAACAACCTTTGTTTCTAGCAAATAATTTGTGATATTACCTGCGCAAGGTTCAAAT  
TGTGAGTTGAATTTAATTTT

>Negative Sample 262

TAGTTCAAGGATAAATGCGAGTTATGAGTTCTAAAGGACACTTTGGTGTCTGTCTTCTGTGTTGGTGGTT  
TATACGATATGGAGAAGAGCGTTTGGAGATGGATTCACCTCAAAAAGGCGAACACTGTTTCGTGATGTAGTT  
GTCAATGGGTTTACAGACATGTTTTCCAGTTCAATTAGGTCTGTTAATTTGCTCGCGGAGGGAAGCTCT  
TTTATTTGGGTCAATCGAAGACAGCACAAATTGAAACTTTTAGCATTGTTCTCGGAAAATAGTCAGTTCT  
TAACTTTTCAAGAGTGGTGC

>Negative Sample 263

TTCATTGGAATAATCCCGTGCAGCCTTCAGGCGCCGCTAAGGATGGGGATGAAGCAGGTAAACCAGCTCC  
CAAACTCGCATCTTCTGCCACGTCTTCCGTATGGGCGCTTGGCTCAAACACAAATTTCTGGTTTGA  
TGTGCACCCCATATTTGGATTTTGAAGTTCAACTGAGTCTAGCATTAATACAAGAGCCAATAATAGCA  
TTGGTATGGCTGAGGAAGAGAAGCAGGAGCCAGAGAGCAAGAGGTCGATCATATTAATGAAGAGGCAAA  
TCTGAACGATGTATTTGTGG

>Negative Sample 264

CAGATCTATTAATCAGACAATGCATAAGATACTAATTTCTGGAGAGCCATATACTTATAGATATTA  
TAAAAATTCGTAATTTTAAGAATCTGCCATTTGAGGGATGCATATTTAATTTCTGGGAGAACTGTATA  
TTTATGGTTGATCTTTGGGGACAGTTAGCTATTTCTTCTTTACATTATAGATGTCACATAGACTTCCT  
TCCTTTTTACGGAATAAGCCCACTGAAATTTTAAGGAAGCTCCAGCTCATTATGCTCTCGTTCTTCTGT  
TCTGAGTTTCGAGAAATACT

>Negative Sample 265

GGTTGTAGCAGTGTGTTGTCTCTTTTGCAACACTCTTGGCCTACCAGTAACATACCTTGTTCGTTCCCA  
AGAGCTGCTGCTCCACATTCCCTTTAAGTCGACTGTGTACGGAGAATGATTTAATTGCTGGAGATCTTT  
TTACTATGACTAGTAGATCTAGGTATAACAAAGGCATCATCGTCGTATTCTCTCTGTATCTGGGT  
GTAAATTTTAATTGGAAATCTGTGCCGTCACCTAGTTTGTCTCTTGAATAATTTCCCTTTTCAAATCA  
AATACTGTCAGGCCGGTACC

>Negative Sample 266

CCCTTACCAGATGAGGAATATGAAAGAGGAAAGGTCGACGAGCTGAGCGCCCTGAAGGACTTCCGTGTAA  
GAATCCTACCCGTTTTAGGTACTATGCCAAGTTTGTGGATTGACCATCACTACGTGGATTTTATCTAA  
TATATCCGATAAACCTCTAGAACCTGTTGAGGGTAAGAATAGAATTAAGGTATACGATGGTATATATCAA  
TCGTTGGCAGGTCAAATGAGCAGAGTCGGTATACCGAGCCAAAGAATCCCATTGGCTTTGAAGGATGTTA  
GTTACCTTGTCGAAGAGGTG

>Negative Sample 267

TATCAATCTAATTAGACCGCTCCCAATAGTCACTGTACTAGTATCAGATGACAAAACCTCGTAAGGTTTTA  
GTCAGTAATGAGGTAGTTTTTCGAGAATTTCCCATGGTTATTTACTTGAGCATAATATGACCAAGTCTGTA  
CCAATTGAGCACCAAATCCTCTTTGGAAGAACACTATTAGAGGTTGGTAATCTTTGGAGAGAGTTTCATC  
TTCGACTGCACTGATTATACTTTCTAGTGTCTTAATGTACCGTCTTCGAACTCTTTCCCTGGGTGTAC  
TTCTCCCTTCTCTGGTCGCG

>Negative Sample 268

TACTGCATATAAAGGGCAGTGACGAGCAGCATTAAATGGAGTGGTCTTGTGAAAGTAAGGTAAGG  
CTTCTAGTTATGAAACTGGAGGTGTTAGCTGGAATAAAAATTGCACATCCTTTACCAAACCCTTTGAAA  
GTAGTTATTGTTGTCCAACCGAGGATGACTATGAAATGATTCAAGACAAATACGGTAGTCATAAACTGA  
GACAGCACTGAACGCCCTTAAACTGGTAACAGATGAAATAAAGAGGAAGAAAGTATTAAGATGCACCA  
AAGGCATATTTAAGCACCAT

>Negative Sample 269

ATAAAATATCTGGAAGAACCAGTGTATTAGCATCAAGAGATAAAACGAATAGTTTTCGGTATAATATCCA  
AAGAGATGACGACTTGTTGATACGATTGTTTGTATGAACAAAGAAGCCGTTGAATCAGTCTTACTTCTTTG  
ACCAATAAATCCGGTATTACTAAAACACTGTTGTCTGGAAGTATCTTGTAGTAAATCTTCGTGTACAT  
TATATACCGTTTTGTTTTAGGTGTTGTAAGTAGAAATCCAACAGTCATGTAATAAATATTCTCATTAGA  
AATGCCGCCTAATTTACATC

>Negative Sample 270

GTCCGTAAAGAAAAAGTACTTAAAATGGGTAGGTTAGTTATGTAGGGAAAGATGTATGTAAGGATATGGC  
TTAACAAAGCTGTAAATGAAAAGAATATAATCGCTATTTTTATATTATTCAAATCTTTTTTTGTATTA  
TAGTTTAGATTTTGCCTGCGATAGTTTACAGCGCGTTATCCAATACAATGACGTTTCTGGTCGTATCA  
ATTGTTTGA AAAACGACAACCGAGCCTTGCTTCCAAGCTTTAACCTTTAGAGTATCACCTGGGAAAACAA  
CATTGGTAAATCTCACTTTC

>Negative Sample 271

TTACTAGCCTTGTCTGGGTTGTCATCTCTATTACATGGGGTGGTATCTGTATTTGTCACATTCGTTTCA  
GAAAGGCATTGGCCGCCCAAGGAAGAGGCTTGGATGAATTGTCTTTCAAGTCTCTACCGGTGTTTGGGG  
TTCCTACTGGGGTTATTTATGGTTATTATTATGTTTCATTGCCCAATTCTACGTTGCTGTATTCCCCGTG  
GGAGATTCTCCAAGTGCAGGAAGGTTTCTTCGAAGCTTATCTATCCTTCCCCTTGTATGGTTATGTACA  
TCGGACACAAGATCTATAAG

>Negative Sample 272

GCTGGCGATTTCCATTAGAAGAACGAATGTTTATGAGGAGCAATCGTTGGGACTATACGATAGTGACAA  
GATGACGAAAATATCACCCACGAAGACGATATAAAGGAAACAGACCATGATGGCGAATCCGAAGAGCGAG  
ACACTGTATCTACAAAGTCCAAGCCGAAGAAACAGTCCCCAAAATCGTTTGTGGTGCTCATTGAGGAG



GCAACTCTCTTTTGATTTATGGTACCTATTCCTTGGATTATTTATAATATGCATATGCGAGGGCAGAAAA  
ATCGAAGACGTTAATAAACC

>Negative Sample 273

CTACGGCATTCTGTTGAAAGTTGCCGAAAAACCCCAAAAAGCATAAAAAAAGAGCGGGGGGAAGAA  
AAAAAGATTCTTTCTATCTTTTCCTTCCCCGGCCTATTCGGGTACTCGCTTCCGGGTCCGCTGTCGTTT  
ATAATGATTAGTGCAGAGAGCTTTCTTCTTAGTTTTTCATGTGGTAAAGGCAATGCCATTTAGAAGGA  
TACTACGTGGGGTTCAAACCGTGAATACGTTGTCTATCGTGTATGTATGTTCTGAGTTTCTTTTTGTC  
ATTCTACTAGTTTATGGACT

>Negative Sample 274

CGACGCCGGCAAGGAAATATTTCAAACCTTCAATAAGTGAAGCGCAAGATTCTCCTACATCTGCCCTTC  
GCCCCGATGGCAATGAGGATCCCACATATCAATACAACGTACAATTTCATTTTCCAGGACCAATAACACCT  
ACAACACCCAGGTCTAAGAATGCAGAAATGTTTCCATCCCCCAGCCCCATTGGTTTCTCCCACAGCGG  
TTATCGAGGAAGAGAATGACGATTCCGTACGGGAGTTTTACGCACGCTAAAATCAAGACTCAACTGCGC  
AATGGTTAAGCTATCAAAGG

>Negative Sample 275

CTTATTTAAATTTTGTAACAAATAAAGAAAAAATTCCTACGAGGTGCGGACTTCAAGTTACATACATTA  
CCTACAGAAGCAAATTTAAAGTATGAGCCGGAGCGGATGACAGTTTTGTGTTCTGTGTCCTATTCTTT  
TGGATGACCAAACCTGTCCAATATCTGTATGATGACAGCATTATTCCTGAATTTGAAGCAACATCTTCATA  
TGCAACAAAGCAGTCAAAGTGTGGGCGGAAAATGTCTTTGCAAATGGAGCCTGACCTCCTTTTTCAAGAG  
GCCATTAGACGGATGCGACA

>Negative Sample 276

TTTGCCTGACCGATCCTTATACGTGTTTGTCTCTGATGTTTTCCATTGATGATGTTTATTTTGATTT  
TCATTATCAATGCTTCCATGGCTTATCAGACAGGTACAGCAATGAATTTGGCTCGTGATCTGGGCCACG  
TCTTGCATATATGCAGTTGGATTTGATCATAAAATGCTTTGGGTGCATCATCATATTTCTTTTGGGTT  
CCCATGGTAGGCCATTTATTGGTGCCTAATGGGGGGGTTGGTTTACGATGTCTGTATTTATCAGGGTC  
ATGAATCTCCAGTCAACTGG

>Negative Sample 277

GGATATATGTTTGAAGTTTTCCATATCTACACCCATATATAAGGGAAGCACAGAGTATGAGTTCAGTTCC  
ATAGGTTTCGATAATGTAGTGTGTGGAGGCAAAGTCATACCATTCTTCTTTATTAATCGACAAATGCCA  
ATAACTGGGGTTCGCATTCATTAATAGATCGGAATCCTAATGCATGCACGTAAATACATAATTCCTT  
GCTCTCGCTGTCTGTTCTGGTGTGAAGTAAGCTGGTTCTTTGGTGATGATTAGTTCTAAATGAATTTT  
TCACTCAAGTCCAATAGTAT

>Negative Sample 278

ATTTATCAATTCTCAACAAGGATCAAAGATCCAAGAATCTACCAAGAATTTGGTCATGGGTGCTGTTAGG  
CAACATTTAGACCAGAATTTTTGAACAGAATTTCTAGTATAGTCATTTTCAACAAGCTATCTAGAAAAG  
CTATTCATAAGATCGTGGATATTCGTTTGAAGGAAATTGAAGAGAGATTCGAGCAAATGATAAACATTA  
CAAGTTGAATTTAACTCAAGAGGCCAAGGACTTCTTGCCAAATATGGTTATTCGATGATATGGGTGCA  
CGTCCACTGAACAGGTTAAT

>Negative Sample 279

ATGATTCTCGCTTTGGGCGACTTCCTGACTAAACAGGAAGACAAAGCATGCGAGAGGCCCTGGGTTCAAT  
TCCCAGCTCGCCCCCTTATTTCTTTTTTTGGACCCAAAGCACTAGCTTAGGCTGTCCATCTTTGTTCTT  
GATTCTAAAGATCACAGTAGAATAATGGTTTATTTCTTAGAGTTCTACAAGTTTTAGCGTACTACTGAAC  
AATGAATGTCCTGATTTTTTAAACTCGCGCATATTTGGAGGCCATATCGTGCCACCAACTTTACTACAG  
TCAAACACCTGTGCCAATT

>Negative Sample 280

AAATATTAGCAATCGCAAAAGTATTAACCTAAGCTAGAGAACCTTCACTAGAGAAGCTCTACCTAAAGGTA  
TAGAACAGGAAAAAGTGTTTTTATTTTGGCGGACTTCGTGGAAGATTGCCTTCCATCAATAATAAGCGTA  
GTCCATAGGTACGATCATTTCTTTTTAACCGTTAAGCAAGCGACAAGATGTATTTTGTACCAGCGAA  
TGCTCTTATTTATCTTCTGCGCCTTTCCAATAATCTAATTATCAATGCTACGAATGATTATAGTTTTAAC  
TAGATGAACGAAATTTCTAG

>Negative Sample 281

CTTTGGTTTTTCTTGGGCTTTATGCAATTTCTTTCAACTTTACCGTTAACTTTTATAGGCAGGCCTTCA  
ACAAGATTTGATGTATCAGACCGATTCTCCGAGGAACCATTTTCGTAATCCTGTTCTTCTTCATCCCAGG  
ATGAGCCTTTTGCCTATATATGGTATTTTCATCCATATCTCCGGTGCATTTTGAAAACATTGCCTTC  
TAACAAGGAATCTTCGTGCTTTCTTTCTTTGCAAGTCTTTCTCTGAATGCGAAATTGAGATCTATTTCTC  
TTAGCCATTATTACTATGAT

>Negative Sample 282

TCTGGCAGCACAGCTGGGACATACTACCTTCGAACATCTCTTTGGCTTTGTTTTATTTTCATTTTTAAAA  
TGACCGTTCTTTTCGATATAAAAAGAAAACATAATAACGAGGGAAATTGTTACCGCCCCAGAATCATAT  
CTATGATCTTAATGATGATTGCTTTTGGGTACTTTTCAATCAAATTATCTACTGATGGCACCATAAAAACA  
ATTTATAAAATAAAGGCTACAAACGGCCTTTGTTAATTTTCTATAATTAATAAGGAATTAGACTTTGGG  
ATCTCATCTTGGCTTTCTGT

>Negative Sample 283

ATACAAAATGTTTGGTGGACGGTTTGTATAGTGTTCAAAACACCACGAAAAGACTTCATTCTTGCAT  
TCTTTTTTCTACAAGATGAGTCTATACATCTGAAACTGCGACGCCATTTTTTCCGCTGTTCCGGGGCATT  
TTGGCCAAATCCTCGAAAGAAAATAAAACGTCAAAGTAAAAAAGGTGGGCTAGACGAAACGTTATTATAC  
GTCATAATTGTAGCCGTGATGAGTGGGTGGAACCTGTATAAATAAACAAGTTCTTACTTATCATATTCT  
CGCATGCAATGAAATTCTCC

>Negative Sample 284

CCGTTCTTTCAAGGAACCAAGATTGGTTATTGTTACCGACCCAAGATTAGACGCTCAGGCCATTAAGGAA  
GCTTCTTACGTTAACATTCCAGTCATTGCTTTGACTGATTTGGACTCCCCATCTGAATTTGTTGATGTCG  
CCATCCCATGTAACAACAGAGGTAAGCACTCCATCGGTTTAACTGTTGACTTGTGGCTAGAGAAGTTTT  
GAGACTAAGAGGTGCTTTGGTCGACAGAACTCAACCATGGTCCATCATGCCAGATTTGTACTTCTACAGA  
AACCAGAAGAAGTTGAGCA

>Negative Sample 285

AAGTTAAATTTATGGGCAGCAGCCATTTAGGATTGGAACAAGTGCTATCAACGATGCATCCAAAGAATC  
GTTTAAAATCTTGAAAATGAAGCTTTATGACGGAGTTATAGAGGATTCGCTAATTCCTAACGTGAATCCT  
ATGGGACAACCCAGAGTGGTTACTAAAGTGATCAATTCTCAAACCTGGTGAAGAGAGTTTCAGGGAAAAGA  
TGCCATTTTCTGATAAGGAAGAAAGTATAACGAGTAACGAGCTTTTTCGAAAAGATGAACAAGTTGGAGGG  
GAAAATCATGGCAAATGATA

>Negative Sample 286

AAACGAACTATCCTCGTTGCTATAGTGTCTTCTGCACTTATCGCGTAGACTTTCTATTGGCACTCTGTCA  
TGGCATTAAATCTTGACACATTCTTAATTCTTCTTGCAAAGAAGGTACTCTTCATGCAAATGATGAC  
TTTGGAGTGAATTGACTAATCCTGAGTCGTTCCAGAACTTTTTAAGGCGTTCGTTTCATGATTTATTAT  
GTCATCCAACCGTCTCATATTAGGTTTCGAATTTGTTACAAATTTCTCGCCTTGATAACCTCTCCAGGTCT  
TCTTTGTTGCATCCAGGTAC

>Negative Sample 287

AGTAGCCGATGCCAAGTTCGATTGGCACTTTAATGACGCTGATCTGCCTGTCGATACCTGGCGTGTATG  
ATGTAATCAGAAATCCTAGACTTCCATAAGATTGGTGGCAGTGTGACAGATTGATATATCTGCCACGT  
TTGATGACCAAGTTGCTGCAGCCACCGCTGCCGCGGCGCAGGCACAGGCTCAGGCTCAGGCTCAAGTTCA  
GTTAAACATGGCTGCGCATTTCGATAATGGCGCTGGCACTACTGGAATGATCACTCAGATATAGCTGGT  
GGAAACAAAGTCAGCGATCA

>Negative Sample 288

TTGACTGTTCAAGAAATCTCTACCATGATTAGATGGGGTTTGAAGCCATACATTTTTGTCTTGAATAACA  
ACGGTTACACCATTGAAAATTGATTCACGGTCTCATGCCGAATATAATGAAATTCAAGTTGGGACCA  
CTTGGCCTTATTGCCAACTTTTGGTGCTAGAAACTACGAAACCCACAGAGTTGCTACCACTGGTGAATGG  
GAAAAGTTGACTCAAGACAAGGACTTCCAAGACAACCTAAGATTAGAATGATTGAAGTTATGTTGCCAG  
TCTTTGATGCTCCACAAAAC

>Negative Sample 289

TATACAGCTGTAAACTTCTTTCTCGTCTACATCATGGTAACGATTGTTCAATCTTTACTTCGTGTCTTT  
TTTTTTTTCTATGACTTTCTATTCCAACCTATGTGAAGACTAAAATTCACCTTAGTAAACGTAAAGACA  
ATGACGATAGGTGCCTAAATCCAATGAAAAGAGCACAAACAGTTTCCATATAATTAGGAGCAGTCTACAA

TCAAGCAGTAAATTTTGGTATCATAAACGACCCGCTGAGACCTTCCATTGGGTCAGGTCGAGAAGTGT  
GTTACTCGAAAATCAGATCA

>Negative Sample 290

TCTGGGAATTTCTTCCCAAATTGTATCTCTCAATACGCATCAACCCATGTCAATTAACACGCTGTATAG  
AGACTAGGCAGATCTGACGATCACCTAGCGACTCTCTCCACCGTTTGACGAGGCCATTTACAAAAACATA  
ACGAACGACAAGCCTACTCGAATTCGTTTCCAAACTCTTTTCGAACTTGTCTTCAACTGCTTTCGCATGA  
AGTACCTCCCAACTACTTTTCTCACACTTGTACTCCATGACTAAACCCCCCTCCATTACAAACTAAA  
ATCTTACTTTTATTTTCTTT

>Negative Sample 291

GATATAAATTTGGCACTATTTATAAATTTTTGAAGAAAAAATTCACTTTGATTCTCTAATCACCAATA  
GTCAACAGCATTTCCTCAATGACCAGTTTATCAAGACTCTGGTTGATACAACCAATGGTAAGCCGGTCG  
TCATGAGTTGAATCCGAAGTTATATGATATCATTGAACTAACGCAATTGATCATCCCATCAAAGCAGGTT  
CTGAGATTTGCCACCCCGTGGGAATCCTCCACGAATTTACACAACAAATTCAGGATGAGCTAAAGGCTC  
TTCACATTGCACAGCTAAAA

>Negative Sample 292

GGTCTTGGACTTGTTATGAAACTTCCGTTTCCCTGTGCGAAGTCTTGCTCACTTTCTTGCCCCAACCTCA  
ATCAGTTTCCAGCATCCTTCTCTCTTTCTTGTCAGCATTCATCATCGGATGTCATGTTATGTTAGATGG  
AGATCTATGGATAAACGAAATATAAACCTTAAATGAAAAAACCGTCGACTTAACTCCTCTATATTATGT  
AAAGGCGAAATGTTATTTGTGCCTTTGAAAAGTGGAGGTCTTGTTGCTTCTCCTTCGACGATAATCGAT  
TTCGGTGACTAGTTAGTAGA

>Negative Sample 293

ATTTTTGTCAACCTTTTCTTAGTTTTACATTGGCAGGTACAGCATCTAATTACTGGGCGTACCTCAGCG  
ATACCACCAAATTTGCTTATCAACTTGTACATCTGTGAAGGAGTCTCCTTATTCTATGTCGATTTGAT  
TATATTGCAAGGTATTGGTATGTTCCCGTTAAGTTGTTATTAGTTGGTAGTTTGATCGGCTTTCCTCTA  
GTGAAAATCAAGGCTAAGACACCTAGGCAACGGAATGAACTTTACAATCCACCGATATTTAACTTTGGAC  
TACAATTACCACAGCCAATT

>Negative Sample 294

ATCGTTAGCGTTCTTTCTACTTGTAATATATACGTAAAATTTATATATAACAATTTTATATGTGTCATTA  
AACGGAAGACGTTGTTGCTATCACAGTGGATTGTGTTATTTGGGTATTTGGAATATTACAGTGACTTCTT  
GCAGCGTTGTTAGTTTTTGCCATGTTCTGCAAGTACAAGGTTGAAGATGTGGTCGAGACTTTGATAGTAT  
CCTTAAACAATTCATTTTTTTATTTTACTGGGTAACGACCTGGTGTTCCTTCTAGTCTCACCGCTAGT  
GGCTTCTTCTTTGCTGACTC

>Negative Sample 295

GTGCTTCCAAATCTAATTCACTGATTACATCAACTGATCCTGTGCGAAGATCACATCAGTAAGTACTCTTC  
ATCAGGCACCCCTGAAAATATTACAGGTGAGGCAGACGACGAAGACGAAGACATAATCAGAACTCTTAC  
GGGCAAATGATCAAAAACAATCCAACAGGCCACATTTGGCGAAGGGTGAATCGTACCAGTCCGCAGAAC  
AGGAAATAGATCATACGGCGCCTGAAAATCAGAGAAAAGACAAGAAAGAAGCGGTAGATCCTTTGATAG  
ACAAAATCTTCGGCTGAGT

>Negative Sample 296

GTCTGAAATATCTTAGATAAGTTAATCTCCAGTAGCTTTGTTATAGATTCAAGCAAGTTTTCCATTTGAT  
TACAGTCTCTTTTAAACAGCTCGACGTTTGCCTATCATTCTTACTGTTTTTTGGCAGAACGGTTTAGATT  
GGTAGACTGCGAGGAGACCTTATGTAACCTCATCTTGTAACAAACGTCAAAGTACCTGAATAAGGTAGCCA  
TACTCTTCTAAATGCCTTTTCCACTGCGGTATCAGGCCACCAATTCAGTAAAGTTAACATTTGATGAGA  
GATTAGCCTTAATATCTTTT

>Negative Sample 297

GATAAAATGAAGAATGACTACTTGGCACCTGCTTACGAATACTTGAGAAACAACATCAAGAGTGACCAAG  
TTATCATCATCCATGACGCTTTCCAACCATAACAATTATTGGGATGACTTCATGACTGAAAACGATGGCTA  
CTGGGGTGTCACTATCGACCATCATCACTACCAAGTCTTTGCTTCTGATCAATTGGAAAGATCCATTGAT  
GAACATATTAAGTAGCTTGTGAATGGGGTACCGGAGTTTTGAATGAATCCCACTGGACTGTTTGTGGTG  
AGTTTGCTGCCGCTTTGACT

>Negative Sample 298

TCTATTCAGCCTAATTTATCGGCAGCAAGAATTCGTTTGAAAAGGGACCTTGATTGCTGGACCTCCCAC  
CAACAGTGACTTTGAATGTAATAACATCACCAGATAGTGCGGATAGATCACAATCGCCGAAATTGGAGGT  
AATTGTTAGGCCTGATGAAGGATATTATAATTATGGATCTATTAATTTCAATTTGGATTTAACGAAGTT  
TATCCGATTGAACCACCAAAAAGTTGTATGTTTGAAGAAGATCTTTCATCCAAATATCGATTTAAAGGGGA  
ACGTTTGCCTAAATATTCTT

>Negative Sample 299

ACTCAACATATATAATTGTCAATACTTTAGGAAGCTACTATTTAAGATCAGGTACGTAGAAGCAGACGAA  
CAGATTCGAGTTTCGATCTCCTTTCTGTATTGATTGGTTAGGTTACATCTCGGTGGAAGGCTGTCGTAT  
CTCAGAATGAGATACGTCAGTATGACAATACATCATCCTAAAAGTTCATAAAACACACATGAAACAACCT  
TATAAGAAAACGAACAGAGTGAGTAACATGAGATAAAACTCCGCCTTCCTTGGCTGACCCACCAACAT  
ATAAATGCCTGAACAATTA

>Negative Sample 300

TAATTGTGAAAGATAACATACATGGTTATTTGGTCAACAAAATAGTATTTTTCTTAATGAATTTGAGGCA  
GAAAAAGGGGTGTGTATATTTTGTCTGCTGTGGCACCAGCGATAAAGACAACACTACATACATGATGAGGAA  
CTAAACGAGGAGGGAATCCATTACTCTCAAGTTCTCAAGGATTTTGTCTCCAACGAATTAACAGAAGA  
GACAGGCCAAAAAAATTCGGATTTCCTTAGTCGAAGTAATAGATGGAAGTCATGATGAAGATTTGAAGAC  
TTCCTTGATAGTTTGGACAG

>Negative Sample 301

AGATACACAAGAGGAGATTAAGCGTGAATTGGATAAAGTCTCGAGAATGATTCAAAAAGCTGAAAAAAGC  
CTAGGATTATCGCAAGAGGAAGTCATCGCATTATTTGAGAAGTGTAGGAATAAATATAAAGAAGGTCAAA  
AGAAGTACATGGAGATAGACGAAGCACTGAACAGGTTACATAATTCCTCAAAGCTCGTGATCAAACTA  
TAAAAATGCGGAAAAAAGGGACTTGTTTTGATGCAGATATGGATTTTCGCGCATCATTGAAAGTAAGGAAG  
TTCTCGGAAACCTTTCCTT

>Negative Sample 302

TGAAAACCCTGACGGTACATTTAGCGTAATAGATCCAGATTTCGACAGATTCTTTTGGTGATGGAATGGGC  
TCTGCAAAGGATAAACCATACCGTTGTGAAGTTTGTGGTAAGAGATATAAGAAGTTGAACGGTTTAAAT  
ATCACAGGGGCCACTCCACTACTAAGATATAATTGTTTCTTTACTGAATTGATTTAGTATGCTATTTAG  
ATACTAATTCTACCGTTACCGACTCATGCATCGAGCGGCCGCTCTTCTCTTGTGTTGGGCGCAATTTA  
TGTGATCATCTTTGAACGAA

>Negative Sample 303

GTTATGGAATTGGTATACCATTGACACCTGCTTCATTGCCAGATCTTGGAGAAATGACACCAAAGGAAAA  
TTTGCTGGTTCTTGCATCGGCTGTTTTGCGCTTGTGGTGGTAGCTCAATGGCTTACTCGTTTTTCAAGGC  
AATTTGACGTAGAGCTATTA AAAAGACAGAAAATAAAGCATTAGCTAGTTACTCGCCAGAGGAGTACGT  
TGTCAAATGTGGAGAAGAGGATGCTAAATCTGATATAGAAGA ACTACAAGGCTTTTACAACGAACCAAGC  
TGGAAAACAACCTTTAATTTT

>Negative Sample 304

GTAGTAGACCTTTTCAAAAATGAAAAAGTTGTTGACGCCGCTTTAATCGAAGAAACGTTACTTTATGCAA  
TGATAGATGAATTTGAAACTAATGTTGAAGACGACTCGGCTTTACCGATTGCCGTGGAGGTCATCAACAT  
ATATAACGACTGTTTCAATTTAAATTATAATAAGGTAGAAAAATTGATTTGGAATGGCAAGAAAAGCAG  
AGA ACTAAAAAATCAAAAAGAGTTGTGCATATTGAGGGTGATGATGATGAAGACGATGAAGATGTAGAGG  
ACTATGATGACGAAGATGAA

>Negative Sample 305

CGTAAGCACAAACGTCCTATTGATCGTTGACGAAATTCAAACCGGTATCGGTAGAACCGGTGAGTTGCTTT  
GCTACGACCACTACAAGGCAGAGGCCAAGCCTGATATTGTTTTGTTAGGTAAGGCTCTCTCAGGTGGTGT  
TCTTCCCGTCTCATGTGTTCTGTCTTCTCACGACATCATGTCTTGCTTTACCCAGGATCTCACGGTTCT  
ACTTTTCGGCGGTAATCCTTTGGCTTCCC GCGTTGCCATCGCCGCCCTCGAGGTCATCCGCGACGAGAAGC  
TGTGCCAAAGAGCCGCCAA

>Negative Sample 306

TCGCTAGTTGTTTTTCAATGGGGGCCTGATAAGTAGCATAAGCCTTGCTGGGTAACTACACTATTCAGT  
CTAGAATTAATACAGAATTAGAGGCCCTTCGGGTTTTCTTACCATCTTGGAGTTACATGGTTTGCCTTCT  
GTGGTGTGTTTGCAGGTTTGATTTCTGTGTCATGCTTAGCTTGGTCTGGCTTAGAATGGTGTATTTCCGAT

AATGGCACGTCCTATGGAGGTGGAATCGATGATAAATTCTTAGGCTACCAAGCCGGTGTATTTACTGATG  
CAGATCTAGACGATGAAACT

>Negative Sample 307

TAGAATAGCACGGCATAAATATATATTTTTGTGCTGTCTTTTTGGGAAGGGTAGTTTGACAACCCATGTAC  
ATTAACATAAAAAGAGCTTTATCATTAAACGGACGAAGAAAGAATGTGTATCGCGTATTTTTAGACTATCG  
ATAATCTTTTTTAAAGTTATGGTAGATAGAAGATGGAATCAGTTACGAAGTGATGAGTTCCCATACATTC  
CAGCCTGTTTACATTAGCTAATTTAAAAAATAAATAATTAGAATATTACGTGATGACTCAGTTTAA  
ACGGTACTCTGTAACACATC

>Negative Sample 308

TTTGTATGGTACAAGAAGTAGCACTAGTGTGGCACCTAAGTTGACGAATTCTCCCACGAAATCAAAAACA  
AATTTCAACATCAAGAAGTGCATCTTACCTAGGTCCGTCGTTACCACATATAAATTACCATCTCCAGTGC  
ACGAAACGATAGACGATATATCCAAAAAATCATAATCCTGCTAATTTGTTGAAGTTTGAGAAAAACTA  
TCACTTCTTGCAACCTATTCAATTGTCCACAAATAGTAAGACACGGATCTCAAAATCACTAGACGAATTA  
TGCGGAGTGCAGCTGACATC

>Negative Sample 309

TGTTTTTAATTTGGGGTATTATTGCCGCCTTACTGGTAGGATTTACTATCAAGAATGTGTCTCCATCAGT  
GTTTTTGTCTTTTCTATGGTAGCATTCAATGTGGGCTCAATAATGGCAAGTGTACACCGGTTCCACGAG  
ACATACTTTCGTACTCAGTTAGGAACGATGATAATTTAAGTTTTGGGATGGATCTTTCATTTCTGCTT  
CTTCCATTATCTTTAGTGATAATTTACCGATGGAGTACCAAGGCATGGCTGGGTCATTGGTGAATACTGT  
TGTCATTTACTCCATGTCCT

>Negative Sample 310

AAGTCTGATAATTCGATTCCTATCAAATCTGCACTGAACTGTTGATGAATGAGAATAGATTAAACAAAC  
TAAAGACAAAATTTTGACGTATCAGAAAAAAGTTCATGAATATCGTAAAAAATTTGAAGAAAACCATGC  
GAAGCTAAACGAGCTTTATAATAGAAATAGAGATCATTTCCTCCAAAAGAGCTTTTGTTACAAAATTC  
ATATCTGATCAAATAAACAATGATATTGACAGTTTAGCTGGATTAAGTTAACATTATTGATTTACATG  
ATATCTTCAAAAAGCAAATA

>Negative Sample 311

GTGCATACGTTAGTCTGAACGGTGTATGGTACAACATTGTTGATCAAGTCGATTGGCGTAACGATGTAGC  
CAAAATTTCTCGAGGACAAAGTGGAGAGATTACCTGGCTCGTACTACAAGATAAATGAGTCCATGATCAAG  
TTCCACACTGAAAATGCGGAAGATCAAGATCGTGTAGCTAGTGTATCGGTGATGCCATCACACATATCA  
ATACTGTTTTTGACCACAGAGGTATTCAATGCCTACGTTTACAAAACGTTGTTTCCGTACAACAAGTGGG  
ACTTTCTTATCGGCAGCTC

>Negative Sample 312

CCACTAAAGGTAAAAACACAGTAAGCAATAAGTGGAAATGAACTTTGAACACGGAGCTGCAATATTATGA  
TGAAGATGAAGACCTTAGAAGAAAAAGACAGTCAGAAATATCAAGATTGATCGATGCGTATGGTGGAGAC  
CTTGAATTTTACGGCGACACCGATGAAGAAAACGACATTCAGTTGAGAATTGCACTCTTAGAATCACAGG  
AGGCGCAAGCACGGAATCAAGCTGAAGCGGGGAGCCTGTCCGAGATGATGAAGATGAGCAGTTAAGAAG  
GGCGCTGGAGGAATCTCAAC

>Negative Sample 313

CGCTTTCTTCTTTTTAACTAAGCCAACCTTTGTACATACCATTCAAGTGTGTTAGCATGGTAAACATTTCA  
AGAGCAGGACAAAATTTCTACGTCATCGAGGACGTTTGATTTGGAAGTGGTACTGCGTTCAAATAGAGGTT  
CTACCCTTTTGCCAACATCAGTAAGGAAGAGCAGCAATTATTGGAACAATTCCTAAAGTCTAAAAACCT  
AAGGGTGAAGAATGAAGATAGAGAGGTACAAGAAAGGTTACAAACCGCTTTAGGTTTCAGACAGTGACGAA  
GAGGATATTAATATGGGTTT

>Negative Sample 314

TCATTGAACGCATGCAAAAACCTAGAGCCAAGCCTTTCTATTCTTTTCTTGTATTTTTATATTCGTTAGA  
GTTTTGTGGTGTCTTTAACTTAATAAACTTTTCGAGAAAAGTGTCAAGTTTCCCAGATTTTTAAGATCC  
TTATAACCTGTAAAAAATAAATAAATAAATAAATAAATAAATAAATAAATAAATAAATAAATAAATAAATAA  
GTTGAAAAGCACTTTAATATAGGTTTTTAGTTTCGGGTAAGAAGATGTGTCAAAGGTCTCGAAAAGGAAA  
CATTAGGGCAAATACGTAAA

>Negative Sample 315

ATCGGCATAACGACAGAAAGACCGCAGATATCCAACAGTATAATTGAGTGCAATTCAGGAACCTTTGATTC  
AAAAGCCCATCAGTTTGCCTAATTTTAGAAACTTGGAGAAAATTAATCAGGTCAAGATTAATGATCTATA  
CACTGAAGAATTTCTTAAGGAAGGTAATGAAATTAATCATAAATCATAAATTATATTTAAAATAATAAT  
TACTCGGCCGGACCCCGAAGGAGTACCCAAATATTTACTTGTTTATAATTTATTATTGAAAATGTTTTA  
TTCTATATTGGTAGAGTTAA

>Negative Sample 316

TTATTTTTGGGTATGTCGTCTTTTGGAAAGCTTAAAAAGTACAAGCTAAATTTTGCTTCTTCAAATCCT  
TTCTGCTTAATAGCTTCATACCGAAGTGTTCCGGTGTAGAACTAACGGTCCTTGCTGGATCCTTGACTCT  
TAAACATGTGTGATTAAGCAGAAGGGTTGGATCATTTCGAGGCTTTCTCAATCTGAATTGGATAGCGTGTA  
CTATCAGTGGACATTGTTAGTTTGTAGCTGGTGGCGTATCTGGTCTGAAGTGTCAAAAAAAGGCATGGA  
AATGTTATTCCGATTTTTTT

>Negative Sample 317

ATGTACGAATTAGATCTTTTTAATACCTTACAAAAGGATGTCGAAAAGGCCTTGAAACAGGATAGTAATG  
ATACGTCAGATTCACCTCAAGATGACCAAGTGGGTAAATCTCAGGCACAGGCGGTAACGCTATAGAAAT  
TTCAGGTTTGCAAATAAAAAAAGTTGATAGAGAGGTTTTTTTATATTTAGATATATGCATTCATAATTC  
GATATATACATGCATGCATATCTCGAGTACAATATTACCATTGTTGTAATTACTTGTTAAATATCGCCTC  
TTCTATTCATGTTTCAAAGG

>Negative Sample 318

GTCACTCTACTTGCTTCCGCATCGATCAAACCGTCAACGGATAAAAGCTTGCCTCATCTTCCTCGACA  
TCAGATTTCTCGCTAGCTGCTCTCTTTTTCGACATCTTTCCTCGGTAGTTTTGTTGTTCTTAGCCATCA  
TTGACCTAGTTATGTTAGAACAGATTTAATACAGTACCTTTCTTCGCTAGGATCTATATGCGAATATATC  
ACATATGTAATTTATAAGCTCATCGCAAAACCAAAAAAAAAAAAAAAAAATTTTCAATAATTTTCACTAATCTT  
CAAAAACAAATGGGGTAACC

>Negative Sample 319

AGATCGTCTCACGTACATCGTATCTGCTCGAGTGAAATCACTGTATGGTAAAAATGTATTATGCATCTCT  
TGTTAGCATTAATGAGCGTAAAGCCGCATTTGTGTAGGTGGACTATCATTGATAAGGAATTCAACTTGA  
TTTGAGTCATATTCTCCGAATGATTTCTGGTTTGTAGTTTTAAGTTTTCCCTTTTGCCCCGCTAGGATCTA  
GTTTGTCTATTCAAATTACAGTGCATGAAAGTTAACTTCGAATTGATAGGGATGCGTCGCTACGCTCAG  
GGACAGCTCATAAACACAAG

>Negative Sample 320

GGCAAAGACAAGGAAAGAATTAATTTAAGGAAGAAAATATCTGATAACTTTGAAAGGCGCTGGAGCTACG  
ATAAAATGAAAAAGGAATTAACAAATATTGTTTACAAAAACAAGGTAACAATGTTGTAAACATCTT  
CCCCTTAGTCGAAAAATATACAGTGAGCGCAGAAAATACACATGATGTTATATATTGGAGTTCTGTCATC  
ATGAGAAATTCATGTCGAAAAAATGAGATCTTAGGTGTGCGTCAGTGTGCCAATTTTTCGTGCGGAAAAT  
GGGAAGATTTTCCAAGACAA

>Negative Sample 321

TCTGAATATTTCTGAGCTCCACTTATCAGCTATCACAGTCGCATTGAGTGTGATTAATTTTTCGGTATAT  
TGATACTATTTCAATTTTTATTTGCCATTATCTAAAATCTTCGTCAATTTTTTTATGAGCAACGTATCCCT  
AATCCCTTTTTTACAAAAGTCCAAAATAGAAAAAAACTATTACGGATGCAGTGATCTCTAATTAGGGAT  
ACTTTTCTTGTAAATTTGGTTTATCGTACGGTAAGAATGACCGAATGAGTGTGGTTTTGATCCGAACCG  
TAAAGAAATACTGGTAGAAG

>Negative Sample 322

TTCTTCTTTTGGTTTTTTTTTCGCTACTTTCCTTAGCTTTTCTTCTTCAATAAGATTTGATCTATTGACT  
CAATATAGTTTACAAAAAATCACCATTTTTGGTCTTCTTTGCTTCGTTAAGTGTAGCTTCCACATTATT  
AAATAGTTCTACCCTTGTCTTGGCCAGTCTGTTTAGTATTTGTTATCTCGTGCTCCGCATTCCATTTTT  
CTACATTGTCTTAGAGACTTAAATGATACTTACCAGGATTCATATACCTGTTTTTTCTCAAGTTATGCC  
ATGGTGTATCAAGATGGTG

>Negative Sample 323

TCTTACTTCAAATGAAAATAATATTCAGTTCGAGGCATGAAGTGGAAGATAATCTCCAGAAACAGCAATTT  
GAAAGGATGAAGTGTGAGTTTCTATTGGAACGTCAAAGTTTGAAGGATCAATTGCGAAAGCGAGAGAATA  
AAATTGTTAAATATAAGCAGAAAATTTGAAAAGAACAAAGAAATTAACAATCTAGCAAAAAGTACTTAA

TCAACATGCAATATCTGATACCTCTCAAATAGATAGTTTCAGTAGCTCGGTAAAGAAAACGCCTTCGTGC  
ACTACAACGCCCAAGAAAT

>Negative Sample 324

TTCTGTATTTACTTGCATGTTACGTTGAGTCTCATTGGAGGTTTGCATCATATGTTTAGGTTTTTTTGGGA  
AACGTGGACGGCTCATAGTGATTGGTAAATGGGAGTTACGAATAAACGTATCTTAAAGGGAGCGGTATGT  
AAAATGGATAGATGATCATGAATACAGTACGAGGTGTAAGAATGATGGGACTGAGAGGGCAATTATCAT  
CCCTCAGAATCAACATCACAAACATATATAAAGCTCCCAATTCTGCCCAAAGTTTTGTCCCTAGGCATT  
TTAATCTTTGTATCTGTGC

>Negative Sample 325

TGAAGGAATTCGAGGGTAAAACCTTTGGTTGACACTACTAAAGATTTTGAATTGGAAGAAACAGACGAAGA  
AAAAGCTGAAAGAGAGAAGGAGATCAAAGAATACGAACCATTGACCAAGGCCTTGAAGGATATCTTGGGT  
GACCAAGTGGAGAAGGTTGTTGTTTCTTACAAATTGCTAGATGCTCCAGCTGCCATCAGAAGTGGTCAAT  
TCGGCTGGTCTGCTAACATGGAAAGAATCATGAAGGCTCAAGCCTTGAGAGACTCTTCCATGTCTCCTA  
CATGTCTTCCAAGAAGACTT

>Negative Sample 326

AATGAATGTATGGATAAATTACTACAAGACTCTATGATGAAAGTAGCAATAACCCCAAAGACTATGAAGA  
AATATCTTCTGAATATGAGGAAATTCACAGATTGGACAATGAAAAAGAAGTGCAATATAAGTCTATCAC  
GGAAAAAATTTACATTTACAAAAGCATGTTTCGTAAATTAGAAAACGACTACACATCTTAAATAGAGAG  
CATGTGACAATTGCGAACGAGTTAGTGAAAAATCGGCTTAATATCGAGTCTGTATTAATGAAAATAATG  
GTTACAAACTTCAAATTTTA

>Negative Sample 327

AGGAAAAGATTTCCGAATAGAAAGTTTTATATGATGGGATTTTCGTTAGGCGCATCTATAATGACAAATT  
ACTTGGGAGAAGAGTCAGATCGTACTAAAATCGAATGTGCTATTTCCGTGAGTAATCCATTTGACCTGTA  
CAACTCTGCATATTTATTAACAGTACACCAATGGGGTCACGATTTTATTCACCTGCTTTGGGTCACAAC  
TTACTACGCATGGTTCGAAACCATCTCTACTCTGGAAGAAAACCCTGATTTCAAAGATGTTATCGAGA  
AGCATTAAAAAAGATTTCGC

>Negative Sample 328

AGCCAAACAGTGATAAAGACTATTGTTATGATGGGAAGGGAACCGTAATAGCGAAAAACAACGCTAACAG  
CGGTGACGTTGCATTTTGCCAGACCGTGCTTCCGGGCAACGAAGCTATGCTGATCCCAACCTTAGTCGGC  
TCTGGGTCAAAGCAAACGCTGGCTGTGCCTGGTACAGACTACTGGGCCTCCAGCGCGTCGATTACTACG  
TAAATGCTCCCGGTGTAAGCGTAGAGGATGCATGCCAGTGGGGTAGTAGTGCAAATCCACAGGGGAACTG  
GGCCCCATTTGTAGCTGGTT

>Negative Sample 329

AATTGTTAGCAGTATCCATGAAAGCATTGAGAACGATTCGGCCCCTAAGTCAGTTAAAGACTATTGGGAA  
CACCCCCAGGCTTACAAACCAGGTGTACCGCTGGTAGCCTTCAAATTGTCCAAGAAATTCACGAAGAAT  
ATCCAGAAGTGCCACAAGCAATCCTTTCTCTTACTGAGAGGTAGGGGTTGGATAATACCAAATTACCC  
ACTACCAAAGGCAACGGATGGATCCGATGAGAAGGAGGTATTAAGAGTGGTTTTTCAGATCGGAGATGAAG  
TTGGATTTAGCACAGTTGTT

>Negative Sample 330

GTGGTTTGAAAAGACCCATACTGGTAAAGCACAAAGAGAGATAAGAAGGGATTGGGTAATGCTCCTGGCGG  
GAATGATGGCGAAGCATGGTGGGAAAGGCTATTTGATGGACATCTGAAGAACCTGGATGTAAGCACTGAT  
TCGAATAATGGCAGTATTAATTTACTCCAAAATGAGGCAGTTGCTACTGCTGTATCGAAAAGTAGCTCA  
CCTCTATACAGGTGGTTTGTAAGGGGAGAAGGGCTGAAAGGAACCATACTAATCTTGGTAAAAAGGAGG  
AAGCCAGCTTTGTTGTATCT

>Negative Sample 331

CAAAAAAAGCGATGGTTGCCAAAATAACTGTTGATAGCTTAGTTGCGAATGCGGTATTAGGTTTAAAGTA  
CGTAGTCAAAGCATTGACGTGTAATAATTTTCTCAGTTATTGGTGCAAATATAAATTCCTGAAACTC  
CAAATATTCAGGAATTCATGGTAAAAATCTTCAAGTATAGAGCTCTTTGGATTTAATAAATGATATAATA  
CAAAATCTAAAACGGGTCCACAATATAAGGTCAATAACATCGCAACACATTTTCGTTAAGTCTTTCACGAA  
CTGGCTGAATTGCCAAGGGT

>Negative Sample 332

CATTTCAATATGATCTTTCATATCTCTATCTTACAAAAATGCTTTAGAAGCTCTTGGTATTTAAGCCTT  
TGTGCTTCCTCTCGTTTTCTCTTCGGTATGGTCTTCGCATATATAGAATAGTGAGCTATCATTAATAATAGC  
AAAACGATCTTAACGTTTGCAAAAATGAAGTCAATATGTACTGACTGCCATACTGTAGTGTGTCTTTGTAA  
GTTTAATATTTCCGCACTGTTTAAGCACCATACAGAAAATTCATTATCGTCATTAGTTGCTTAATTTTA  
TTGAATGCGTAGGATAGTTC

>Negative Sample 333

ATTTCTTGAAAAAGTGCAACACAAGATCGGCTTTACCGATGAAGAAAAGGAGAACATCTTACTCTGGACC  
AACACAAATTTCCAGTTTCAGGGCTTATTATCGGACCAAAAACACCTTCAAAGATGTGAGTAAACATTCTT  
TACTCTTTGGTAGAATTTTACCCGAGGAGTCTAAATTGTTCAAAGAATTAATCGTCTAGAAAACGTACA  
AACATCTTCATTGGAGGATTTTATGGATGATGAAAACGCGACTGACAGACCAATGGACGATGAGCAAGAT  
CTAGGTATGGCGATAGAACA

>Negative Sample 334

CTACTCTGTAGTATCCCCGTGAGGGTCCACAGCACCTTGGTAGGGGGTCTTGGGCTCGTCTATGTGAAT  
ATCTTGGAAGTCTTTTTTGTATTTCATTTTCTGCTAAATTTCTTTGGTTCCATTGAACTCGCTCTTCT  
GGTGTCTCTTGGCCAACATGTCTTGCTCATGTTTCAGTGACAGTGTGTCTTTTGGAAAGGAAGGTACTCG  
ATGTTCCAATTATCTCCCCCTCTCTTTTGTATTATCTAGTCCCGGTATATTCCTTTTATGTGATGTCAA  
TTTGGCATTTTTCTGCGTAT

>Negative Sample 335

CGCGTATAATGTTGTGTACATTAAGAATTGAATAAAAAATTTTGGATTCCTAAAACCAGTGCATTCAGCG  
AACCAAGGGCAATGATGATCCATTTTCAATATGCAAAACATCGCATGATGAACAATGATGACAGCGATCGG  
GCTTCCAAACATGGCATACTTGGCACACCCGAAATCTTCCATCATGTTTTAAGGTCAAACACCTTTTTGA  
CATATACTCCGGAGGAAGTTCAAGTCCATTTTCCGCTGCCTTTAAATCGTGGACTAACAAATCAGGGAAA  
TCTAGAGGAGAACCGGGACC

>Negative Sample 336

GTACCAAAACGCAATCATTCCATCACTGTACAAGAAGACTAATGCGGTGATATTAECTTACGATATAACA  
AATGCGAAGTCTTCCAAAGCTGTATGGAGCGGTGGATAGTTCAGGCGTTGGAAAACCTTTTCTTCCAGG  
ATTTGTTAAAAGCAAGATTTTTTCTGGTGGGTAACAAGATTGACCTTTATAAGGAAAGGCAGGTAACCCA  
TTATGATGTGGTGCAAATGGTTCAGGAAATGCAACTGAAACATGGTATTAATAATTCGGGAAACTTTGAA  
GTAAGCTGTAAATGGGTCAA

>Negative Sample 337

AACTTCCATTCCGGGTGATACCTGCAATATGAGGAAGAAAAAAGATAAATTTTTTCTTCTTAAAGTATAAA  
AGGCGGACATATTTGATTTAAATGCAGAAGTTTTCTCTCAGTGGTTATGTTTTACATATGATAGAAAAA  
ATGAAGCAATAGCAAAGTATCGTAGTGCGAACCAGTCTCGTAACTTTGATAAGTTTATCAAAGGCGTTAA  
CATTTTGTTCGTAATAGTACCTTAAACACATGACGAAGATGAAAATTAACATGAATTCAAGGAAAAATG  
GTAAATGACGAGAAAAAAGC

>Negative Sample 338

CCAAATTCAGTAAAGGGATTGCGAGATCCAAAAAAAAGATAAGAGGAAGCGTAGGAAAGGAGAAGCCAA  
GACTAATTTGCCAATGTTTGGCGACCAGGATGATGAACGACCTCAGACCGTTAGAGAACGCCATGGCGTA  
TTCAGTAAAGAGTTTATTAGTGATTGAGAAGATGACGAGGATTTGATGAACCCTATATTTTTTAAAAACG  
AAACATATATGAGATGGTTACTAGATAAAAACAATGGTCAGTTGACCGAGGATAGATATATCCAGTTTGC  
CAAATTTGCCGCGGAAAGGA

>Negative Sample 339

GGCTTGACTTCTGAATTTGGAAATGACCTCGAAAGTTTATCAAATGTGGCCACAGTGGAAAGCTTTTTT  
ACTTCAATCTCATCTTCTGTGATACTGTCTATTTTGCCGCGCTTTTTTGGAGGGGGAAAAGGCATCATGGC  
CTGATAAGTCGTCACCTTCTCTATCATGTATGTATGTTTCTTGTCTTTTCATTAACAGTAAAGTTATC  
ACCACTTCCCTTTTTTGTGGAATAAACACCTTTTCTCCTCACTCGATTAATTCCAGACCAGGCCCAACC  
ATCTCTGTCTACGCAGGTCA

>Negative Sample 340

GGAGTCTGAAAAAGGGTGGCAATGTCTTCTTGAAAACGACAACGGGAGATTTTGTGAAATTGGGAGTTAA  
ATTAACTTCAGGGACACAGGCGATATTGGAGAACACCGAGGAACTATTCGGTGGTGTGGTTCCAATGGC  
AGGGTGTACGATGCATCGAAATTTGGCTCCGCTGATGGTGCAGACAGTGATACTGCAGCTGTATTAGACT



TGGATACTTTATTTCGAGGAGGATCAGTTAGTTGGTAGTAAATATTCCAGGATAAGAGATCATGAGCCCAC  
GGCAGTAGTCATCGATATGT

>Negative Sample 341

GTTGTTGCTGATAATTTGAATTTGGTTCAGACAAAAAGGTTATCGTTGCCTTGAAAGACGATGTCTCTC  
TATCGAAAGTGAAATCCTTTAAACAGCCAAGCAAAGGAGTCTTGATGCCAAGTGCTTCCCTCCAAGATTT  
TTATGGCTAATTCTTATTTTCAAGGTTTTAAAGTTGTATTCCGAGTGTATTATATAGTTGTTTCCCTTCC  
GGAAGTTGTGTAATATATAGTTTTGAATATATATAATGGTGTAAATAGAAATGCCAAATAGTACGTAGT  
AATATTATTTAAATTGCATG

>Negative Sample 342

AATCAGTTCAATTATCTATTTGCAGCCATGGCATATGTTGACAAGTTTTATTTCAGTATATTTTATTGAGT  
CCTTCTTACATCAATGTTTTGAATATCTATGCATTTTGTAAATGTCCACGACTTATCATGGGGTACAAAGG  
GTGCAATGGCAAATCCGCTGGGTAAGATTAATACTACAGAAGATGGTACGTTCAAATGGAAGTTCTGGT  
CTCTAGTTCAGAGATTCAAGCAAACACTACGATAAATATTTGAAAGTTTTAAATGACTTCGATCCAAAATCA  
GAATCTCGGCCTACTGAGCC

>Negative Sample 343

AAACAGTACTTGGTGTCTCGAGCGTTCCTCGCTTGACATAATGATTAAGCAGGGTCTAGAGACTGGGCA  
GGTGTATTTGGAATGCAGAAATTGAAATGAAAAGAATGAAATAAAAAATAAAAATCCACGAATTGATTAAG  
GAACTTATCAAATAATAGAGATCGGTAAAAAGATAGGAATCTAATAAGTGGAAAACACTCACTTGAATAATA  
AAAGAGTTTTTCTCGATAAGAAAACACAATCACTTTTACGTTGAACCCCTTTGGTAGTAACTTTTCTGA  
GCTTAAAACCACTCCTGAGC

>Negative Sample 344

CTCGGAAAACCTGGTGGATTTTGTATGATGTTAACATGGTCGATAAGACCAGACTGTTTATTTTTTTTATTT  
TTCAGTTTCATCATTACTATAACCGTTTATGGTATAAATTAGAAAAGTTAAAGCAGCATGTTTTTCATTTGA  
AACAAATACTAATGCAATAATAGGTACACCATCTACTACATAATTAATTGATAGTTTCCTTTTCCGTTAA  
GTGCATGCATAGGACGCCATAATTTTTTAAAGTTAAAAAAGCATGTATTTACCTATTCGGGAAATTTACA  
TGACATGGATGCCATAAGGA

>Negative Sample 345

CTATGATCGAGATGAATATTAAGTCAAGTCGTTAAAACCTGCGTACCTGTTACTGAATCCGAAAAGAAT  
ATTGATATTGAAAAGAAATCTGAAATCAAAGTGGTACTAGCCAGATGGTGTAAATTAGAATTAGGATA  
TTAATATCCATTTGGAGTTATGAATAAAGATTCTATAACCTTTGCGAATTTGAAAGAGACTATCTTTGA  
TGAACCCATCGGATTCAATGTCACGACCTTCATTAACCTGCTGGGCCATTCGCGGATCCTGCACCAAGGGT  
CCGGTGGTTGTTGTTTCAGCA

>Negative Sample 346

TTCAGCCGATTGCAAATATCTTAAAGGATTTTCCCAAAAAAATTTATTTTGGTCGGTGATTCTGGTGA  
ACATGACTTAGAAGCGTATAACCACTACGGCTTTACAATTTCCGAACCAGATTCTGGCTATTTATATAAGA  
TGTTGCTCTAATCCATGAGTGATGTCCCATCGCATGATGAAGAAGTTATGAATGAAGTGAACAATATCA  
TCGAATTACAACAACGGCCCATGCAAATGACCAAGTCTACCGTACGTACCAGGAGAAGACCACCACCACC  
TCCATTCTTCCACTCAA

>Negative Sample 347

CTTATGCGAGGGAATCGGGAAGATTGGCTTTGAAGTGTTTTTAGCCTTTTGTTCCTTAGTATGATCTTGA  
TTATTGAGCGGTTCAATTCAGTGGAAAAGGACTGCTCTATAGTGTTTTAAAGTTTTACAGAAATATAGTGA  
TCCTATGAATGTCATTTTTTTGTTTACCTTTAGAAATGCGGAACCATTGGCATTTTTTTTTCTTTATTTAC  
TAATTTACCTAGAAAATCCAAATGGCACAGGGCGAGCGAATTTTTTTTTCCCTCTTTAATGAGCGAAATC  
GAAGATTTTCGGTAATGTTG

>Negative Sample 348

GCAAGTTTCAGTTTCACTCAAACTTCTCCATGGAAAATATTAAGAGCGAGTTCCAATCCTTGCAATCT  
AAATTAGCAACCCTTCGCACCCCGCAAGAATTTTTCAATTTCAAGAAAATTTCCAAACCTCAAACTTTG  
GGGAAGTTCAATCCAGAGTGGCGTATAACCTGAAGTACTTTTCCAGTAACTATGGTTTGATTATTGGTTG  
TTTGAGCATTACACATTATTAACAAACTTGTGCTACTCTTTGTTATTGTTCTAGTCGTAGCTGGTATT  
GTTGGTATAAACAACCTAA

>Negative Sample 349

TTCATTGAAATAGAAAGACATTTACAAAGTAGACGGGGATATTTAGCCCCACTCATATAAATTATGCATT  
ATAACTTTTATAAAAAAAAAAAGAAATCACACTTAAATAAATGTCTTAATTGCACATTCCATGTTTCAGATAT  
ACACTATCTTACCTTTTGAATAGGAATGATGGAAAAAAAAATTATGCTTCCAATCGGATTTGAACCGATGA  
TCTCCACATTACTAGTGTGGCGCCTTACCAACTTGGCCATAGAAGCCCGTTATTACGGTCTGTGATCCAG  
CAAATGTCAGATATAACGAA

>Negative Sample 350

CCATTCTAAAATGGTTGCTGAAATTGATATGAAGGAAGCTTTGGCTTCTGGTCAATTCAGGGCTTTAACA  
AGAAAAGAGATTGAATTACATTGCGCCATGTTGGGGTTGGATTGAGAATTAGTCTCACATTCAAGAATTA  
GAGGTTTATCGGGTGGGCAAAAGGTTAAATTGGTACTCGCTGCCTGCACGTGGCAAAGACCCCATTTGAT  
TGTTTTAGATGAACCTACGAATTACTTGGACAGAGATTCATTGGGTGCTCTTTCAAAGCATTAAAAGCT  
TTTGAAGGTGGTGTCAATTAT

>Negative Sample 351

CAGATTCTAAGACACCTTGAAATTTTAATTCGTCGTTTTGTTTTACTAATTTGATCAAGTTCCTTGTCTAG  
CAATTCCTGTACAATGGACATCAAGTCTGTAAACGACCCGATTCCCATTGTTTTTGGAGTTCCTTGTCTGT  
GTAAATAATGCGCCTATTCCTTTGACATCATCTGGCTATGTAAGGTTTTAGCATTGTCCGATAGCTGTA  
ACCCATTTTCTATCATTCCACTCATATTCAGGATATTGGCGCTGTAAATTCTTCACTTGATTAAGATTTT  
CTGTAATGATCTCATCTCAC

>Negative Sample 352

AGAGATTCTGTGAAACTACCGATGTTTGATCTGTTTCTGCTTGGCTGCGCTCCTGACGGTCCATAGCCT  
CGTTATTCCTCAATTTTCAAGAGAATCTACGTGAAAATCTGGCATGGGTCCATACCTGTAGAAAATGCACC  
CAGCGGACCTTCGAATAGGATTTCACTGACCATCCAGTGATTTGTCACTCTCATAGAGTCCCTTTGTT  
GTAGAGGGCGCCACAAAGGCGCCTGTAATCAAGACAATAATGGAAAGGCCTGAAAAGGGATTGCCTAGTA  
GTATTGTCAATGAGGGCGCC

>Negative Sample 353

CGTCTCTTTAGTCTGTCTTTCATTGCCATTACTCCACTACTTGCCTGCTGGTGGCGGCGTTGGCGTGCTGG  
AGGTGTTGAAACTGTTTCGACGTTTTACTTCGACCGAGACTTGCCCTGAATTCTTGGCCTGCTGAAGGTCT  
AGTCGGCCGTGATGAAGCTCTTCTCGGTGTCGCGCTAGAGGAGCTTGTATGATTATTGTATATATCTTGA  
AACGATTTACTCGCAGGCGTGTACTCCGGTGTGTTCCCGTTTTGAAGAAGGTGTACCCATAGGATCTTCTG  
AAGAAGCCTTCTTCTGTTA

>Negative Sample 354

AAACAAAAACATTACATGGACAGCGGCTTAGTGATATTCGATAAACAAAAACACTTTTTCTGTCTACCAA  
TCGCAATAATGCTGCAATTTTCGCCTATCCAAGAGTTTTTCCATGGTGATAAGGAATGGTTTTGGCTTAG  
TTTTGTTTTATTTCCAAAAAAGAGTTTTACTTTTTATCCAATAGAGGCTTCGAATGTAGGAAGATTAGAGAAG  
CCGGAGACTCTAGAAAGCAGTACAATCTGTTCTACCCAGCTATCTCACACGGACGTGTACGGTAATCTTT  
TGTGGTTGAATGGCGGATTA

>Negative Sample 355

CCAATTCTGTTGTTTGCAGACATTCATTAGACCAAGGTATTACTGACGGGCTATATGCGGTTAGCCGGTC  
ATTGTAGTTTCACTTCTAAAGTGTACAGTAACGTTTTGAAAGTTTCTTTCTCAAATTGTCTATCGTACT  
AACATTGCATCAACAAATCGTGTTCGAACCGCCAAACTCTCACTTCTGCGGTATGGTTTTTTTAGCTTG  
GTGTCATAAACTTGTCCATTAGACAAGCAAGGTCATTGCGGATTAGCTAAATATGGGAAATAAAACAAA  
TTTTTAGGGCTAGGGCAATT

>Negative Sample 356

CGCTGGTCATACCGTCAATCTGCTCCAGCTGAAACTGTTATTTGTGATTACTTCTACACTTCCAAAAAG  
CCACTATCAACAATTTGTTTCGAAGGTACTATTGTTCGATGTCGGTCCAAAACATTATGCAGGTATTGATA  
TGTTACATCGTTACTTGCACGTCCTACCATGAGTATGGATGGATATGTTGGCGAGTACGCGGAAACTCT  
TGAAGAAGTTGTGGACTACACCCAGAACAATGCTACTTACGCAGTTAGAAACACCGACAACACTATCTTTAC  
TATCTCGCTGACGTTTACAG

>Negative Sample 357

AGGGTACGATACATTGGTGGATGCTTACAGGAGCTATTCOAAGCCAGTTTTTTTTTTCAGAATTTGGATGC  
AATAAAGTATTGCCAAGGCAATTCCAGGAAATAGGTTATTTGTTTTCTGAGGAGATGTATTCAAGTATTCT  
GTGGAGGTCTGGTTTACGAATTTTACAGGAGGATAATAATTATGGGTTAGTTGAATATCAAGAAGATGA

TTCAGTACAGCTCTTAGCAGATTTTGAGAAGCTTAAATCGCACTACCAAAACATTGAGTTTCCTTCTATG  
AAGACTTTAAAGGAACTGT

>Negative Sample 358

ATAAAAGACGATTTTTTCAGAAATAAAGTCAAACCTCACCTTCCAAACCTATTAGCTGCCCCAGCATCAAAA  
GGATAAAGATCGACATTAGGGACTTGAAGATGGATCCGATTTTAAAATCGACACCTGGGGACGATATAACA  
ATACGTGTGCATCTCAAAACACCTTTGTGGTGTAGCTACAGATCTAACTTTGAGGTGTATAGGCAACAGC  
TCAATTTTACATGGCGACGATAACAACGGATGCAACCCCAAACCTAAAGGCAATTTGTATTGCCATGTGCT  
GCAGGCATGTCTGTGACTAC

>Negative Sample 359

TACTATCGAACCATAGAAACCCATATATTCCCCAATATTAATAATTCTACTGAGAAATGGGTGAATTTTG  
AAATAATTGTTGGGATTCCATCGTTGATAAAGGCTATAATATTAGGTATACAGAATGTACTAGAAGTTCT  
CCTCGATGATATAGGAATCCCCATAATGGAATCTATATTTCTATGTACCAATATTACGATTATTCCTCAT  
TCCATTTTCATATGTTTCATTATCCTATTACATTATCGATCCTTGCATTTACAGCTTCCTCTAACTTCGGTG  
ACAGCTTCTATAATAACTTA

>Negative Sample 360

CACGTGAATATGTCTATTTTATGTAAACTATAACAGCTGGTACTGCCCGTACATATGCTTAAATTAATA  
GCTATTGACGAAGGCCATTTTCTCGTAGAATATCAGGGTAACATATGGAATAATCATTTTTCTCTGTCT  
ATAAGTAGTAAGACTATTGCTTCTGATCCTTCTGTCAATCGCCTGTCTCCAGTTTTATTTCTTGTACCT  
AGAGAAACATACGCTGGAGTTCCTGTACTATCAAAGTTGTTTCGGTCCCGCCATTTCCGACTAGCTCT  
ATAGCTAATGGTTGAGACTC

>Negative Sample 361

AATCGAGCTTCGGAAGAATAAGGGCTTAGTACGAGGTTTGACCAGTTCAATTATTGGAAATCCAGGCCAA  
GTCGGTACATAAAGTTGGCCCGAAGAATTCACAGTTAACTCAAGGAAGTTAATTGGGGTATCATCTTTA  
TTAGCTTTTTTGGCGTATAGCTCACCAAGCTCTTCGTATACTGGGGCCAGAGTTTTACAATGTTGGCACC  
AAGAAGTGTAGATTTTTATCATTGTGTAAGAATCATTCTATTGCAGATATCGAAGTACTGCTCAATCGA  
CTTGACCATCGTGACAGCTT

>Negative Sample 362

CAGGTGCCGAAGCTATCAAGCAAATAAATATATCTGAGGAGCTCAAGGAAAAGGGGAACGTTTAAACAAC  
ACCAAACGATCCGTTATTACACGTTGAGGTGAGTAATGAGGATAACTCGCTGCACCTTTATATTGTACAAT  
AAAACGAATATCATAATTCCAGGAAATTGTACATTTGAATTTTCTAGCCAAATCTCCGAGGTATTAGTA  
TCAAAATGGGACCGCATGAGATAGGCATAAAGGGTCAGAAAGAGCTATGGTTTTTTCCATCATTACCTAC  
TCCTCTCTCCAATTACACAA

>Negative Sample 363

ATCATTTAGTGAATTCATATTTTATATGATATATAGAATAAGCAACATCCCATGAATCAAGCTGATAAT  
CCGTTTTGGCAACTGATTACTTCCCAAAGACTCCTTATATTAGGATTGTCTAGACACCCCGGTATTACTC  
GAGCCCTAATAACAACAGTAAAAGTTTGTAAATATATAGAATTAATTGGTCACAATTGTTTGATGCTCCCC  
TTTCAATTAACGAATATCTATTGACTGGTATTTATATTACTATTATATTATCATATAAGACGTGACAAGA  
TGACATAAAGACTAAGAAAC

>Negative Sample 364

CTCATGACTAGATAGTTTTATAACCAAATACATCATGCATCTTTTTTTTTTTCCTTATAGTTTGTGTCATCA  
ACATGTTTTTGGCCGTATTAATACACAATAATCTATCCTCTCAGGCAGGGAGAAGAAAACCTAAATATACA  
TAGCACCCCTCACACAGGATGTCAAACCTATCGTCTTATCCTCATGCCGCCGATTTTATAAATATGGAAGA  
ACCGCCAAATCTAAAGAGTTTTTCGATGATCTTTGTGCCGTCCCTAATTTACTCAAAGACGTTTTCCA  
AACTCTCGAAGATCGACGCA

>Negative Sample 365

TGGCGTTAGAGAGTGCGCCCTACATACTTTGAAAAGAGGTTACCACCCTAGGAGGTGGCGAAGTGCAT  
TTGGTTGTTGATTCTTTGATTGCGCAACCTATAACTATGCATGAAATAGATAGGCCATAATTTTCATCGA  
TTACCGGTGTAGCATACTCTACCAGAGTAAGTCCGTCGCTTGTGAATAGAATGATCGATGGTGCTAAGAA  
GGTATTGAAAATCTGCAATGCGAAGTTAACATAACGGCAGATGTCTGGAGAGGTGAAAATTCAGGGAAAG  
AGTCCAGGCTGGGGTATTAC

>Negative Sample 366

CTAAGATAATCCTGAGCATCAGGATGCCAGCAGTTTAGCAATTTGTGCTCTTGACCTCCTATTACTCTAT  
TTTTAAGCACGATATCAAAGAAGTATTTAATTCGACGAAACTCATATTCTCCACACAGTGCAGGAAAGG  
TTTGGACTTGACAAGACTCTTAAATCCTCGTCCGGAAGCGAACCTGTCTCCACTCAAACATCCAGATAG  
TGATTGACGTTATCAATTGTAATCGCTTTTGAGCTAGGTTTCAGCCCTTCTTTTAGCAATTTCTCCACAA  
GAAGAGAAGAAAGATTCCCA

>Negative Sample 367

TTAGTGGACACGTTTTTCAAAGGAGAACCAAATCTCTAATACGAACTGGGGTCAACTTCATAAACTCTT  
TAGAATTTGATTGATTTACCATGGTCGACACAGTCAACGGTGTGCTAAAGAAGGGTTCATATGCGGTAT  
AACTGTAGTAGACCCAGAATTTTCGCTGTTTCTCCTCGATTTAATGGGCAAAGGGGAAGAAGTTGCTGTC  
TCCATTTCAACATCAAAGTAGTGAATCCAAAATGAAACCTTTGAATTCTAATGCCAGAATGCTATATCT  
GATGATTAATAATAGCCTAT

>Negative Sample 368

TTCGGTTATCCTTTTGAATATATTAATTGCTTTGTATTGACTGCGTACCAAAAAGTTATTGACAATGCA  
GATGACGAGTACATGGCTTTGATGTCACAAAAGACGTTGAGATACATTAGAGCACCTGATGAAGATGTCT  
ATGTTTCTCCATTGAACTTAATTGAAGTGTTCATGACACCTATCTTTCGTATTCTTCCACCGAAGCGTGC  
TAAAGATTTGAGCTATACTGTAATGACAATAGTGTACAGCCATTTTTGTTGCTTATTCTGTAAAGAA  
ACTCGGGAGGCTAGAAGGAT

>Negative Sample 369

TGGATTTTACATCTTATGTTGGAGCCGCTTCAGTTCCTTCGGTTTGATTCTTTTAGGCGCTACTCTTGG  
TAGATTGAAAATTGGAAAATTATACCCTGGTTTCTGGAAATCCGCAGTGGTATTAGTCTTCTCAGACAA  
TGTATCATGCCGATCTTTGGTGTCTTGTGGTGTGACCGTCTAGTGAAAGCGGGATGGCTAAATTGGGAAA  
ACGACAAGATGTTATTGTTTGTACCGCCATTACTTGGAACTTACCAACAATGACCACCTTAATCTACTT  
CACTGCAAGTTATACCCCTG

>Negative Sample 370

GCATGGTGGTATTGCTTGCTGTATTAAGTTAGTAATCTCCTTAAACGCGCATTGAGCACAGACTTTCTGG  
TAGACCCAATCTTATCTATTTACGAAAACAAGAGTGTATAAGAGTGTATAAGTTATTTTTTGCATTTATT  
CTTTTGTGGTAGGGGGGTTTCTTAGCCGCTCTTTTTGACTCAAATTTCTTTGATGTCTAGTGATAGTG  
CACTTCCCATGTGCGCAACCTGTGTTTTTTGTACTCCGTAGTTTAAATGCAAGGGCTCGATATGCCCTTT  
TTCCTTTTTCTACTTTGTAC

>Negative Sample 371

TGTTCCACAGGAACACTTTGGGTAACCTGCTATACCATTTTTGATTAAATGCTCTTTTTGAATATATTTGT  
CTTGATCAATCTGATTGTTTCTGGAGAAGGGTAAATTTTAATTTGGGATGTTTACTTGAAGATTCTT  
TAGTGTAGGAACATCAACATGCTCAATCTCAATCGTTAGCACATCACATTTTTCAGCTAGTTTTTTCGATA  
TCAAGAGGATTGGAAAAGGAGCCATTAACGTGGTCATTGGAGTTGCTTATTTGTTTGGCAGGAGAATTTT  
CAGCATCTAGTATTACCGTC

>Negative Sample 372

TGCTATATCGAAACCAAAAAGAATATTGCAGACGTAATGACCAAACCTCTTCCGATAAAAACATTCAAAC  
TATTAACAAACAATGGATTCAATTAGATCTATTACATTATGGGTGGTATGTTGGAATAAAAATCCACTAT  
CGTCTATCAACTAATAGTTATATTATCAATATATTATCATATACGGTGTAAAGATGATGACATAAGTTAT  
GAGAAGCTGTCATCGAAGTTAGAGGAAGCTGAAGTGCAAGGATTGATAATGTAATAGGATAATGAAACAT  
ATAAACGGAATGAGGAATA

>Negative Sample 373

CAGATTGGGATTTGTCAACCTTGAATATCCCGTTGGATAAAGCTATGAACTTACTTACTGCTTTCAAAAT  
ACATTAGATATATTTGCTAAATGGTCTAATGATAACAACAAGCAGTTAAGAATTATTATGGCTCGCTCT  
TATACATTTGTTATCAACATCGCCCTGGAAAGCATATATAGAGCTGTTTTGGAAAAAGTAATCAAATATA  
GAACCGAGGTGCGAAAACACATGGTTACAACAACCTCCAAGACGAATTGAATGGGTCTTATTCGCTCACTGA  
CAATGTAAATACTCCAATCG

>Negative Sample 374

TTTATCAAGGAATTTGCTGAGAAAAACGCTTAATATCAGCGGAATATGCCTGTAATTTGGTTCAAAGAAA  
AACTTTTTCAAGTCATATGTAAGTTTTAAATAAATCAGTTTACGAACATGCACAAGAATAACTTCTCTTC  
TTTTTCTTGAAATAAAGGCCGAATTATACGATATGATATGAGACGTTCTAATTACAATACGATACCGTGA

GATAAAAATAGCGATATCCTCGTACTCAAAGAAGTCTAATTGTTTTAGCCCGTTGATCAAAAAAATAAAA  
TGTATTTTTATTTTTTTGTC

>Negative Sample 375

TTGAGCACAACATCAAATGTACGCAAGCTTATCTGAATACAAAAATATACCAAGAGGGTTTGTGAGAACA  
GTTTGTGGACTTATTGGGCGATTATTTTGTCTGTACTGTAAAAACATTGCATTTCTGAACTTGTAACA  
CCGGTTATTATCTCTTTACGCCGTTACATCAAGACTTCAACTAATGTCAAACCTAACAAACGTTTATCAA  
CTGTTGTAGAAAAATTGAACCAAAACAGCACATTCATCCAAGAAAAGAGATCAGATGTTGAATTTGGGCC  
AACAAACAAATCTGAAGTTT

>Negative Sample 376

GGACGAATCATCGATGTGACCACTGGTAAAGCTCTTCTTTTCAAGAGTTCGTCTAATACCTCACTGGCCG  
GCAAGAGACAGGAAGAAGAGGAAGGTGAATTACATAAATGGGGTGTGTTTGTACAGCACCAAAGCTCAAG  
ACATAACTCTGGGCTTCTTCATCCGCCAATTCTTCGAGAATTAGCGGGTTCGTTAACACCAGATAGCAGT  
GTCGCCGAGGAAAGAAAGGGGAATCCTCTCGCACATCTGGTACAAGGCCAAAAATCTTACCAAAGATTC  
CTACCGGTGCCGAATTAAGG

>Negative Sample 377

TACAGAAGCCCACAAGAGCATAGTCATAAAGAAAATGCGCTATACCTAATCTCTGGCCAATGGTCAGGTG  
TTTCAACAATTATAAAAAAAGACTCGCAAGTTTCACATCAGTTTTACGATTCATCGGAAACTCCTACTGA  
ACATTTATTAGTTAAGCCAATCGAAGAACAACATCCTCTGGAAAGTAGGAGGGCATGGAAGGATGTGGCA  
GAAGCAATCAGACAAGGAAATATTAGTATGATAAAAAAGACTAAGGAAGAACTAGAAAATAAGCAAAGAG  
CCTTGAGAGAACAAGAACGC

>Negative Sample 378

AGAAACATTAAAAAAATATGCTTTTATACATTGATCAAGCTTAAAAATTGGACGCAACCCGGAATCGAAC  
CGATGACCTCTTCCTTGCAAGGGAAGCGCGCTACCAACTGCGCCATGTGCCCTGATGACTGTTGAAACTG  
TTGTATCTCAAATGAGATATGTCAGTATGACAATACGTCATCCTGAACGTTCAAAAACACATATGAAA  
CAACCTTATAACAAAGCGAACAACATGAGACAAAACCCGTCCTTCTTAGCTGAACTACCCAAAAGTATA  
AATGCTGAACAATTAGTTT

>Negative Sample 379

TCGAGGCTGTATTCAAATGGCTTGATGCGCTGTGTGTAGATTTTTTTTTCATAATAAAGGAGAAGGTCCCC  
TCTTGCAGAATTGAAAAATGAGTATTACCAAAATATATTGCTGATCCCAGCTTTTTATGATAAAAGTGTC  
TCCGAATTGAAGGATGAAGTTCAGCGATTGATTCCCCTATATGAAGAGTATTTGAGATGGTTTTATCTGA  
AGAAAACCTCCGATTACTTTTACGAATAAATCCGCTGGAACAATATCTCGAAAAAAGTCGCTAGTAGCTAA  
CATTGTAAAAGAGCCTAAGG

>Negative Sample 380

ATAAATTCCTTTATTGTACGGATATTCTGCATTACAAATGAGTCTTCTGCTTTATGCGGATCGTCAGCTT  
ATATTGCCTTCGTACAGAAAATGAAAATCACTACTGGAAACGGGTGAGCGGATGTATGAGTGTATAGTA  
TACACCCGGTTTTTTTTTACCCTTTCTAAGACCGGAGCTGGCGACAGTAAGTGATAAGCGGCCGTTGGCGG  
CCGTGGGTGAGTTATGCATGGGAACCAGCATGAGCCAGCGATGTTCACTATAAAGAGATTAATGTAGAA  
AGTGCTGAGAGACCGATCGA

>Negative Sample 381

TGTAAGTATGACGACGAAAACGAAAAGACTAATAGTTTCATATAATACTAAACGATTTCAATTTTCGTTT  
TATATCCTTCCTATTACATAAATTTATTTTCGCTATGCCAATAATGAGTGGATGTATAGTTGATATCTGTT  
TCGATAATTTTAAAGTAGATAGTAAAATCTTACTGACATGAATAATCCGTCCAAAACCTAGATTACTGTAT  
ACAAGCATATTTAAAAAATAATGAAACTATGATCAAAAAACTGTGCTACTACAGCGGTGTTGTTATCCG  
ATACAACCGGATATTTTTCT

>Negative Sample 382

TGCTAGATCCATCAGACACGTTAACTTTATGTAAGAGATTATATAGATTATGTGTATCGAGAAGCAAA  
TTGATTTATAATTAGAGGGAATGGAATTGATGTTTAACTGCTTACTATATTTTATCTTTGATAATTG  
CGCAGAAAGTAATATATCCGGTATTTGAAAATAGGAAATTTAAAGAAATCCCGTCACGCCTGGAATGAGG  
GGTGAAACCTTGACTGATATTATTTCTTTTCTGGACATAGTGTCTGAACCAAATGCAAATTGCACTGC  
ATTGCACCAAATTGATGGTT

>Negative Sample 383

ACAATTAGGGGACTTTAAAACCGATACTTGATATATGAGCACAGTCAAGGGGCCGGTTCTTGAGATTTTA  
ATGGAAAAGAGGAAAGTTGCACATACAGGTCTGCTTTTCTTTGCTTGCTCCAGACAACGATACTTAGAAC  
TAAAACATATTTCTAGAACACTTTTCTCCTTCATTCAAAAAGAAAAGTGGCCTTGCAATGACTCCAAAAA  
GAGCGCTAATATCTCTTACTTCATACCACGGTCCCTTCTATAAAGATGGTGCGAAAACAGGCGTTTTTGT  
AGTTGAGATTTTGCGGTCGT

>Negative Sample 384

CTTCAGGATCAGCAAAGATTTTCAACTACTTTGTTAACGTTGTTTCTATGTTTCGGAATCTTGAGTTGGAT  
CACCATTTTAATTGTTTACATCTACTTCGATAAAGCCTGCCGTGCTCAAGGGATTGACAAATCAAATTT  
GCTTATGTCGCTCCTGGCCAACGTTATGGTGCTTATTTTGTCTTATTCTTCTGCATTTTGATTGCTTTAA  
TCAAAAACCTTCACTGTTTTCTAGGTCATAAATTTGATTATAAAACATTCATCACCGGGTATATTGGCCT  
GCCTGTCTATATCATTCTT

>Negative Sample 385

TCCCAAAAGATAAGCTTATTATTGTACAATCTTGAGATTCTGCCTTTTCAAGATCAGATTCTGGTCSA  
GTTTACGCTGCAAGGTTGCCAAAGCGGATTTGTTCTTCTTAATTAATCAGCGGTTTACCGTCTTGGGA  
GTTTACGATTTTGCCTCAAATCTCTAACCTGTTTGGAGATACTTTGCTTGTGGATTTTTTCTTATAAAGT  
TCAAACCTGGACTTATTGAGATCTCGAAACTTGATGGTTTTGATTTCTCTTTCGCACTCAATCAATTGAG  
TCCTGAGAGTATGTCTTTGG

>Negative Sample 386

TCCCTATTATTTTCTTCCCATCCAATCACTGATAGTTACTACCAGTATCCTCTTCCCAGTAATAATAAC  
ACCATCAATTATTTACCATCAGTAGATGTGCAGTATCCTTTGAATGTGAGCCCCCTCAACGAGCCATC  
CGGCCTCTGAGGTAATCATATCGTCTTTTCTCCGAGGTCCATGCCAAGTACTTCTTCAAATATAAAGA  
TTCTGCCGACTTTCAAGCACGGACAACCTATGAACAAATACAATATTAGACCAAGCAATATCAATGTCAAT  
ACTAGTAATATCAATAACCA

>Negative Sample 387

TTGGAACTTTTTGTCTATGATTTGTTTTTTTCAATTTATTTTTTCAATTTATTTTTTCAATTTATTTTCA  
TTTAGTTAACATTATTTATGCAGTTATTTTTTTTTTTTCCCACCTTCATGGCCTCGTTTATGTCTTTTATCA  
ATATATTTTTTACGTTTATAAGTCATTTACTCGACTTTTTTTTACCTTTGATATGCAATCATATTATTCTT  
CCCTCCATTATGGCTAAATAAATGATAATTATAATCTATAGTTTTTCAAGCGTTCATATTTTGACAGATAA  
GATTATGCAACAACCTTGAA

>Negative Sample 388

GGCTTTCGTTCACTGACGAGTACGGTGACCGGTTGAGATGTTGCCATCATTAGTGGATTTTCGCATTTTG  
AACTAAATTTACTGGAAGCGTTAATTTTGGAGTCTTTTGGTGACTCCTATTGGATTCTGGTGGTCTGAAC  
ATTGAAGCCATTATCCTGTGTATATAATTGGTATTTTGTAGATATGATAACAGTGCCTGCTATGCTAATC  
AGGTAATACTTGCTACTAGTAAATGTCTAATTTTTTGGAGCGAACGAATTTTCATGCAAATTAGAAGGTAG  
CCAACATATAAATATATGAA

>Negative Sample 389

GATATCATTTTTAAAGACGCAGTTAACAGCGCACCTTCTAATTCTCTACTAAAGGCTACTGTCGAACCAG  
CATCCACGTCGACAATTGCTCAAAGAATAATCAGATCTCATAGAAGCAACGCTTCCCCAGAAAAAGAACT  
TCATGAAAACAAGCCGAGAAGCACGGAAAAACAGGAACAAAGGGAAATTAGAAGCGATACCAAGGTCAAG  
CAGCTCTCGTCAAATAATAGAGCAGCTGAAACCCAAATTCGGTTTTTGAACAAGAATTTTCCAGTGAGG  
ATGAAGATGAAGAATACGTT

>Negative Sample 390

CAAGTCTTTTATGGTATATTGACGCTTCTAGTTGTGGTCTTTTCTGGCTGGCTGACCTACTATCACGTTT  
ATGATTCATTTGCAAAGAAAAATCTTTTTATTACTATGGTTATGGGCATGATTCCTTTTGTCAATGGGTT  
CATTTGCTGGCAACTAGATATTCACCTGTGTTCTTTTTGGATCTATATCCGGAGAACATATTTGGCCCTG  
CCATTAGGTGTTCTATTGGAAGTGCATGCTTGGTGGCATCTTTTACCCTGACTGGTGTCTATATCTTCG  
TCGTGTATTTGCAATATTTG

>Negative Sample 391

AAAGAGTTGATCGATTTGGTATTTCCATGGCTGTCTTATTTGAAGCAGGATATGCTTCTTATTGATAGGA  
CGAATTACAAGCTTTATTCTCTGTGAACATTTGAATTTATGGGCAGGGTTGCCATTCAGGATCTCCG  
ATATCTGAGTCAACATCCCTTATTACTACCCAATATCGTAACATTCATTTCAAATTTATTCTGAGTTA

TTCCAAAACGAAGAGTTTAAAGGAATCGGTTCAATTAATAAAATTCAAACAATAATGCCCTGAACAATGTTA  
CAGGAATAGAAACCCAATTT

>Negative Sample 392

CAGAACTTCTTATTTCAGTGGTCCTCCCTATCTAGTGCTACTGCACAATCGGAAGACCGAAATAATACGCT  
TGACAGCAGAGTACTTGTCTTAGGAGCAACGAATTTGCCATGGGCGATTGATGATGCAGCAAGAAGACGA  
TTTTACGGAACACTATACATTCCTTTACCAGATTATGAACTAGACTATATCATTGAAAGAGATTAATGG  
CCAAGCAGAAAAATAGCCTGCAAGATTTAGACTATGAATTAATAACAGAAATGACCGAGGGGTTTTCTGG  
TTCTGATCTTACGTCATTAG

>Negative Sample 393

AAAAATTATCATGGAACATTTACTGATAACGAAGAACAATTCTCAACAGCAGAAGGACTATTCACACGTG  
CCATGCAAATTTTTTAAGATGGGCAATTGCCAAGCTGGCTCGTCTTGTCCCTTTTCCCATTCCCCAGATA  
TTATCAGTTCTGCGAATAATTTACCTTGCAAGTATTCGCAAAGGGTAACTGTAAATTCGGTAACAAGTG  
TGTTAATGCTCATGTGCTGCCAAATGGGTTCAAGATGAACAGTAAAGAACCTATTGACATCACTCCCCCT  
TCACAAAACAACACTACTTATC

>Negative Sample 394

ACAATATTTGCTATACTGGTCATCTAGAATAAAAAATACTGCGTTGTAGTGCTGAGTGATAGAACTTTTTAA  
ATCATATTATGTTATATAACAAAGAGCAGGGAACAAGCGGCGCTAGTAGCTCTGGTCGTAGAACGAAATT  
CCACTTCGATCGTTTTGTACAAATGGTTCTGTTTCATTGCCGCTAATCCAATTATTGCTGTTTCAGTAGCC  
AGTATCCCGAAATCTGGTGTACGCCAGATTTAAAAAGAGCAGATATTCTTGAACAGAAGATCAAAAGCT  
TAAATAGTGCGCTGAGTCCA

>Negative Sample 395

GAAATTGCACTTTTCGGGCCCAACTATCATCTGAGGAACAGAACCTAAAATACCATAGACAAATGGGCTAA  
TAGCCAAAGAATATAGTCCGCATAAAGGTGGGACATGTGCAATTGAAGTTGTGTACGATAGCGCAAGTGG  
TATCTGAAATGACGCTACTGAGATACCTGCGATTACGTCGCCCCACAGTTTATTGAAAGTGTACTCAGGA  
AGCCATGAAAAGCAGGGCAGGTAATAAGGTAAAGTTTCAAACACTGTATTCTCATCAACGCTATCATTAT  
TGTTTCGTATTACTTGTATTA

>Negative Sample 396

AGTTCTCTTCTCAATGGTAACAGAATCCATACTACCCTCTGCAATTGGTGGAAAAGCTGATGCCCTAATA  
ATCAACAGTTTTTTTTCTGCCTGGCATTCTATTGTAGAAATAATGTTACCTGCATAAATTGGCCTTATAA  
AGGTCTTAGGATCTTTGATTACAGTAACCTCACAAACAGGTTGGACGTCCAAGAGCGCACCCACCCGAGG  
TAAAACACTTTTTCCAACAGAGGAGTTTGAGACAACAAAATGTGAATAGTCGCCGCCTTTTAATAGTTTC  
ACTAATAACGGAGTTAGTTG

>Negative Sample 397

CAAGACTCGTTGGCCATACACCCCTATATAATCCCCTGAGACCGCCTTCGAGTCTGTAAGTTTCGCTTAG  
TAATTGCCAGATCCCCGGAGGCTTTGATATACTTTTTGCCTTTGAGCGGTTAAACTGCTCAAATTTGCT  
GTCTGAATCGATAGTCTTTGTTTGTATCAAGTCCAACGGGTAAGTAGCCACCACACTACAACCACACACA  
ATGCACCACTGAATAGTCTTTGGGTGTTTCGTTAGTTGTTCTTGTCCATTATTGCCATTACATGGAATAA  
CTTTTTCTTACAAGCTTCGT

>Negative Sample 398

AACAGCTTGTCCAGATCCCGAAAGAAGGTTTTTGATATAGTTAAATCGCCCCAAAATATCTTTTAAAAA  
TCAATGTAAGTATCTTTATAAAATCTGAACAATTCAAGGCTCTTGAAAGATTGGTTACTGAACCTAA  
ATTATTGGTTATTTTAGAAAAGTGTAACATTGTGATTTTGATACTGTCCAAATTTTAAAGGAGGAAATT  
ATGCATTTTTTTGAGGTTTTGGAACTCTACCCGGTGCATCAAGAATACTCCAAACTGTCTCATCAAAGG  
CAAAAGAGCAAGTAACAAAT

>Negative Sample 399

TTTAAAGTCGCACCTGTAATAACTTGACAGTACATAGGAAGGTATGAAAAATCGGGCAATCTCCCTCTA  
AATTATACTGTTTTGTTTCAGAATTTAAAATATAAGTATCTGTTGGTTTTATCATTGGTGGGCACCTCACT  
GTTATTAATACAGTCCATATTATTTTCGAGCGCTTGTGAGTGATTTCAGATAATAATTATAGAGATTCTCT  
CTAGTGGTGAATCTCTGAAGATCTTGCATGGATTGTAGTCGATTTTTTCGTTCCAATTATCGGCCAATT  
CACTCAACTCACTCCATTTG

>Negative Sample 400

ATTTTGTGGCTAAAGAGGTAACCTATGTAGAGTTGCTTGGGATGAGCTTCCTTCTCTGTTGTTACTTCAGT  
TTGATCTGAAACTTAAAAAACGAAATTTAAAAGGAAGACAACGGTGAGAACAAGAAATGAATGAATCAAG  
AAGTCACGATCAAGTATGTAGGTAAGATCAGGGGGGAGTATGTACGTAACCAAAAAGATTGGGAAAGA  
GTTTATATATGAATCATGCCTACGATCGTACCTTCTTGGCTTCCCAAGAAAATTTTTCATCTCTCGAAC  
TTCTCGAGAGATTGCGAACG

>Negative Sample 401

TTGAAAGTTTGGTTGGATATACACCTTTTAGTGGTTCTTCTACTAATGAACTTACGAGAATTTAAGATA  
TTGGAAAAAACTTTAAGAAGGCCCGTACTGAGGATAGAAGAGCAGCATTCTCAGATAGAACCTGGGAT  
TTAATTACAAGACTAATAGCTGACCCCATCAACAGAGTACGATCTTTTGAGCAAGTTCGCAAAATGTCTT  
ATTTTCGAGAGATCAATTTTGAACCCTAAGAACAAGTTCTCCACCATTTATTCTCAATTAGATGATGA  
AACGGATGCAGGTTATTTCG

>Negative Sample 402

GAATTTCTAGTATAATCTGTATACATAATATTATAGGCTTTACCAACAATGGAATTTTCGACAATTATCAT  
ATTATTCACCAATTAATCACAAGTTGGTAATGAGTTTGATAACAAGTTACTTTCTTAACAACGTTAGTAT  
CGTCAAAACACTCGGTTTTACTCGAGCTTGTAGCACATAATACCGTGTAGAGTTCTGTATTGTTCTTCT  
TAGTGCTTGTATATGCTCATCCCGACCTTCCATTTTTTTTTTCTTGAATCAGTACATAGCAGGTATGAG  
TTGTTAGAGCTGTTACAAGT

>Negative Sample 403

AGAGGACGACGACTTCCCAAGAAAGAAAAATCGAAAAACAGCAAACATGATGATGGTTCTACTGGATTT  
TCTGCTGCAGTAAATGCTATTTTATCATCACATCTGAAAGCATAACGACAGGAAGGACCCCATCATGGCTA  
GAAACAAAAAGGTGCTGAAGCAAAGTGAGTCAGAAAAGCTAGAATACAAGGCCAAAAAAGCATTGTTGGC  
AGAAAAAAGATTATTAGGTAAAGCCAGAAAGACGGATATTATTCCAATTGCTTCCGGAGAAGACAGG  
TCAGAAAATATTAGAAAAGT

>Negative Sample 404

CGGAAAAGAAAACAGCAAGATAGTGACGATGGTGGGGATACTATACTGGAAAGACCGTTGATTTTTAGTG  
CTAGAGGCACGCATGCTAATTATGCATCCGCTGGGCAGCATGCTCATGACATTCCTTTTTTTTCATGCC  
TTTGAGTGATTTTACCGATCGTGGTCCCCTGTGGGATCCATCTTTGAACTTTTACTCCTATACTTTTGAT  
GGTAAAACGTGACACCCTCCTCAGAGAGAGAAGAATCTCTCGGTTTGGATTGGTTGCATTTTCAAGGTG  
GATGGGGTGATCAACAACCTA

>Negative Sample 405

AACTGTCTCTTTTCGAGAAAAAGAAAGAGAAAAGAAATGGTCTCTAGCGGGATCGAACCCTGATCCCCGC  
GTTATTAGCACGGTGCCTTAACCAACTGGGCCAAGAGACCATTATATTGTTAAAGATGTTGTATCTCAA  
ATGGGATACGTCAGTATGACAATACTTCATCCTAAACGTTTCATAAAACACATATGAAACAACCTTTATAAC  
AAAACGAACAACATGAGGTAACCCGGCCCTCCCCTAGCTGAACAACCTCAAACGTATAAATGCCTGAACA  
ATTAGTTTATAGATCCGAGTTT

>Negative Sample 406

CTCTAGCATGGAAGTTGGTACTAAATAAGAAGGATATGCGGATGAATTTTTTTTCGAATACTAACGCCAC  
ACACATTCAGTCGAAATAGCCAAGGATATGTTACAGGATACACTTTTAACTCCAATCGACCTATATGAT  
GTGCATGGTCTGTGATACCAATGAAGGCCTAGAAATAGCCAATGCATTGGTAGACGTCGTAAGTAAGT  
ATGATCACAATATGAAGTTGGAGGCTTGAATATTTTGTGCGATGTATCTAAGTTCGTTTTCTCCCTGAA  
ACATTGCAATCATAAAATGT
